# Supplementary material for: Tyrosine Kinase Inhibitor Independent Gene Expression Signature in CML Offers New Targets for LSPC Eradication Therapy
Source: Cancers (Basel). 2022 Oct 26;14(21):5253. doi: 10.3390/cancers14215253 (PMC9655972; doi:10.3390/cancers14215253)
Supplement: Supplementary file 1 [file cancers-14-05253-s001.zip › Tables.xlsx]

## Sheet: Table S1 - CML patients
Patient	Gender	Age	Disease	BCR-ABL1 > 10%	Additional information	Experiments
CML1	M	61	CML-CP	No	ELN failure. Used from frozen	GO
CML2	F	27	CML-CP	Yes	ELN failure. Intolerant to IM and NIL, Used from frozen	GO, CsA, CD33 expression after IM
CML3	n/a	n/a	CML-CP	n/a	Used from frozen	GO
CML4	M	63	CML-CP	n/a	Change to bosutinib after 3 months, Used from frozen	GO, CsA
CML5	M	45	CML-CP	No	Used fresh	TKIi-remove because of low quality
CML6	M	63	CML-CP	Yes	ELN failure. Used fresh	TKIi
CML7	M	43	CML-CP	n/a	Used fresh	TKIi
CML8	M	56	CML-CP	n/a	Used fresh	TKIi
CML9	F	63	CML-CP	Yes	Patient changed to dasatinib. Used fresh.	TKIi
CML10	M	60	CML-CP	No	Used fresh	TKIi
CML11	n/a	n/a	CML-CP	n/a	Used fresh	TKIi
CML12	F	30	CML-CP	n/a	Used from frozen	GO, CsA, CD33 expression after IM
CML13	M	69	CML-CP	n/a	Used fresh	GO, CD33 expression after IM

## Sheet: Table S2 - nCML patients
Patient	Gender	Age	Disease	Additional information	Experiments
nCML1	F	n/a	Erwing sarcoma	Used from frozen	GO
nCML2	M	65	Diffuse large B-cell lymphoma	Used from frozen	GO, CD33 expression after IM, CsA
nCML3	M	48	Lymphoma	Used from frozen	GO
nCML4	M	34	Allogenic donor	Used fresh	TKIi
nCML5	F	28	Allogenic donor	Used fresh	TKIi
nCML6	M	49	Lymphoma	Used fresh	GO
nCML7	M	20	Allogenic donor	Used fresh	GO
nCML8	F	53	Myeloma/plasmablastic lymphoma	Used fresh	GO, CD33 expression after IM
nCML9	M	35	Lymphoma	Used fresh	CsA
nCML10	M	68	Lymphoma	Used fresh	CD33 expression after IM, CsA
nCML11	M	56	Myeloma	Used fresh	GO
nCML12	M	n/a	Lymphoma	Used fresh	GO
nCML13	F	n/a	Myeloma	Used fresh	GO, CD33 expression after IM
nCML14	M	54	Myeloma	Used fresh	GO
nCML15	n/a	n/a	n/a	Used fresh	GO
nCML16	F	n/a	Lymphoma	Used fresh	GO
nCML17	F	61	Diffuse large B-cell lymphoma	Used fresh	GO
nCML18	n/a	n/a	n/a	Used fresh	CsA-72h CsA only

## Sheet: Table S3 - tkii_genes_with_FC
hgnc_symbol	logFC_TKID	logFC_CMLD1	Analysed by qPCR
ICOS	0.214486	1.94835	FALSE
ASAP2	0.0373907	1.93858	TRUE
PPIF	0.143998	1.78098	TRUE
ESAM	-0.0376914	1.68178	TRUE
CD33	0.0972427	1.61232	TRUE
RAB31	0.164249	1.38839	FALSE
ZMAT3	-0.0738974	1.32587	TRUE
BCL2L11	0.143121	1.15913	FALSE
AQP3	0.0983589	1.15602	FALSE
UBASH3B	0.125389	1.15581	TRUE
ACER3	-0.0527237	1.11799	FALSE
ARHGAP10	-0.107267	1.0914	FALSE
MSANTD3-TMEFF1	0.00579812	0.974209	FALSE
EGFL6	-0.035599	0.955022	FALSE
ATG4D	-0.0807544	0.930121	FALSE
NT5DC3	-0.110522	0.922785	FALSE
IGFBP2	0.10338	0.884192	TRUE
PPP1R14A	-0.165262	0.877536	FALSE
CPNE5	-0.0864504	0.822903	FALSE
GMPR	-0.00925248	0.818863	TRUE
ADNP2	-0.170728	0.813568	FALSE
METTL7B	-0.103146	0.737987	FALSE
GRB10	0.0659726	0.709557	TRUE
PTPN7	-0.0706982	0.700999	TRUE
ARL6IP6	-0.0325454	0.697447	FALSE
RBM38	-0.0208059	0.682265	FALSE
C11orf24	0.051728	0.597162	FALSE
UBL4A	-0.0259356	0.582523	FALSE
STK39	-0.0805553	0.561813	FALSE
COPS9	-0.036048	0.548287	FALSE
BAX	0.0257625	0.544236	FALSE
EPN2	-0.00336974	0.538359	FALSE
NCLN	0.00338272	0.503157	FALSE
PGP	-0.0297279	0.494296	FALSE
SLC39A3	-0.0566527	0.487636	FALSE
RCOR2	-0.013656	0.482754	FALSE
PHLDA3	0.0201833	0.481952	FALSE
HNRNPF	-0.0875922	0.474893	FALSE
FDXR	0.00166798	0.468427	FALSE
TSKU	-0.0621144	0.466703	FALSE
SPCS1	-0.0755402	0.453965	FALSE
PAQR4	-0.100811	0.446769	FALSE
TTC38	-0.0828685	0.439049	FALSE
PLD6	0.0327614	0.433802	FALSE
AK2	0.000190991	0.416378	FALSE
RDH13	-0.0550115	0.404441	FALSE
SYP	-0.0222595	0.393993	FALSE
SEC61A1	0.0328799	0.386509	FALSE
MRPL12	-0.0486491	0.384709	FALSE
RPS6KA1	0.0786623	0.378371	FALSE
CHST2	0.109682	0.374396	TRUE
PDXP	-0.0247634	0.37289	FALSE
BAG1	-0.0771428	0.370064	FALSE
AVL9	0.025277	0.368446	FALSE
HS2ST1	-0.0593394	0.365135	FALSE
INA	-0.0055388	0.364411	FALSE
DUSP23	-0.0573841	0.359268	FALSE
EPHX1	0.091583	0.353338	FALSE
PREB	0.0340346	0.330161	FALSE
IRAK1	0.0162512	0.330129	FALSE
PUSL1	-0.0355142	0.325126	FALSE
PDE11A	0.00963669	0.323055	FALSE
TPRA1	-0.0385582	0.321056	FALSE
NOMO1	-0.0252572	0.27891	FALSE
CARD9	0.0558991	0.240517	FALSE
MBNL1	0.0683662	-0.277096	FALSE
NSUN3	-0.0777538	-0.31793	FALSE
DDX59	0.0285108	-0.328471	FALSE
PGBD4	-0.0511036	-0.339978	FALSE
RNF38	-0.0994422	-0.361609	FALSE
NKAPL	-0.0317673	-0.36749	FALSE
OR52N2	0.0355852	-0.368157	FALSE
INO80B-WBP1	-0.0101897	-0.372219	FALSE
TMEM234	0.000558262	-0.383715	FALSE
RAG1	0.0141302	-0.384685	FALSE
FAM160A2	0.00334961	-0.385139	FALSE
ZFC3H1	0.0739225	-0.385224	FALSE
UBR2	-0.0599138	-0.388017	FALSE
DHRS12	-0.0361574	-0.389404	FALSE
PNPLA6	0.0632476	-0.393896	FALSE
RGP1	0.0437529	-0.398116	FALSE
MOSMO	-0.0176392	-0.398223	FALSE
NDFIP1	0.000985434	-0.399151	FALSE
WASL	0.0176933	-0.41439	FALSE
BCLAF3	-0.114988	-0.416271	FALSE
CD59	0.0125881	-0.417652	FALSE
DYRK1B	-0.0377201	-0.418219	FALSE
ZNF189	-0.0346753	-0.425385	FALSE
FAM184A	0.0686962	-0.426526	FALSE
CWF19L2	0.0860309	-0.440838	FALSE
MPHOSPH8	-0.00580112	-0.443292	FALSE
TNNT3	0.0898769	-0.452602	FALSE
RSBN1	-0.0511381	-0.454166	FALSE
SETX	1.63152e-05	-0.459384	FALSE
LEKR1	0.024093	-0.460157	FALSE
PPP2R5C	0.0103043	-0.460365	FALSE
HOXB5	-0.0488394	-0.461656	FALSE
CTC1	-0.0462502	-0.47426	FALSE
TNRC6B	0.0176533	-0.475127	FALSE
SCN3A	0.118839	-0.480311	FALSE
FOXO1	-0.00338141	-0.482109	FALSE
PHC3	-0.0281539	-0.489811	FALSE
MYLIP	0.0125148	-0.493967	FALSE
ANKRD12	0.0675903	-0.508534	FALSE
GLIPR1L2	-0.0565956	-0.51649	FALSE
TBCEL	-0.0317599	-0.519074	FALSE
ULK1	0.0976521	-0.52294	FALSE
ZKSCAN1	0.0403817	-0.525468	FALSE
SPTBN1	0.107624	-0.53262	FALSE
IDNK	0.033295	-0.533272	TRUE
PRDM2	0.0344418	-0.538174	FALSE
HOXB4	-0.0368629	-0.543963	FALSE
SLC5A5	-0.021995	-0.545574	FALSE
TPK1	-0.106103	-0.558338	FALSE
KDM4C	0.0237795	-0.564001	FALSE
JMJD1C	-0.0810554	-0.573241	FALSE
MED7	-0.0243546	-0.573372	FALSE
FBXO15	0.0611394	-0.57466	FALSE
NKX2-3	0.0876585	-0.580524	FALSE
TMEM208	0.053442	-0.593881	FALSE
FAM133A	0.0168902	-0.595767	FALSE
RCBTB2	0.000775729	-0.596989	FALSE
TCEAL2	0.0421102	-0.607998	FALSE
PPP2R3A	-0.0506669	-0.616527	FALSE
KIAA1109	-0.0219841	-0.617548	FALSE
CEACAM21	0.087752	-0.617891	FALSE
KIZ	-0.0858521	-0.623267	FALSE
PLSCR4	0.0369519	-0.624222	FALSE
SPATA45	0.0346393	-0.624636	FALSE
GNA12	0.0815135	-0.625234	FALSE
SGCB	0.0164769	-0.641473	FALSE
VIP	-0.0917629	-0.647783	FALSE
BMP4	0.0625163	-0.647879	FALSE
GIMAP4	0.0657892	-0.658196	FALSE
PLCL2	0.0840192	-0.694091	FALSE
CES4A	-0.00862603	-0.721271	FALSE
OR13C9	0.0111152	-0.728181	FALSE
FGF20	0.0385804	-0.734356	FALSE
CLNK	0.0205992	-0.734775	FALSE
C1orf21	-0.00537902	-0.738471	FALSE
LARGE1	0.0548477	-0.741436	FALSE
SMAD1	-0.0783861	-0.743903	FALSE
SCAPER	0.0945273	-0.745336	FALSE
ANKAR	-0.0585544	-0.747365	FALSE
UBQLNL	-0.0739296	-0.74781	TRUE
GPRASP1	-0.102892	-0.749697	FALSE
SEPTIN14	-0.0235615	-0.755733	FALSE
PM20D1	-0.0255881	-0.758773	FALSE
ZSCAN16	0.132732	-0.760558	FALSE
AP1G2	-0.0772941	-0.772275	FALSE
KBTBD3	0.109491	-0.773481	FALSE
CCDC159	0.0323818	-0.782783	TRUE
DNAH10	0.0656472	-0.791145	TRUE
DST	-0.0642366	-0.799227	FALSE
TMEM50B	0.0450171	-0.799725	FALSE
DEPP1	0.0867528	-0.815492	FALSE
RASSF9	-0.0231474	-0.827334	TRUE
NMRK1	-0.0386833	-0.839436	FALSE
SLCO1B3	0.081526	-0.846373	FALSE
ITPR3	0.0603775	-0.846692	FALSE
IQCA1	-0.00870696	-0.855115	FALSE
SPATA7	0.0712456	-0.880893	FALSE
OR13C3	0.103325	-0.908861	FALSE
DENND11	0.00124193	-0.91033	FALSE
NAP1L2	-0.0589528	-0.916295	FALSE
PRDM16	0.0277138	-0.93148	FALSE
L3MBTL4	-0.058287	-0.934788	FALSE
SOCS3	0.108212	-0.948015	FALSE
MCOLN3	0.0729029	-0.972976	FALSE
CLIP4	0.00209897	-0.976949	FALSE
ZNF862	0.0708665	-0.985964	FALSE
ANOS1	0.0804028	-0.997852	FALSE
MMP28	-0.103651	-1.0058	FALSE
NSUN7	0.0432771	-1.01776	FALSE
SLC6A16	0.107186	-1.02295	FALSE
DUSP18	0.0907839	-1.04101	TRUE
FLNB	-0.0550076	-1.04145	FALSE
ABCA5	0.0231506	-1.06108	FALSE
ARHGEF17	0.0787414	-1.0911	FALSE
TBC1D12	0.0222317	-1.09669	FALSE
MIR99A	0.0518552	-1.11608	FALSE
TTC12	-0.0269387	-1.129	FALSE
ABCA10	0.00495797	-1.14125	FALSE
GUCY1A1	0.00447764	-1.17524	FALSE
BMP6	0.0351034	-1.17528	TRUE
EMP1	0.00239914	-1.22554	FALSE
HOXB3	-0.0528814	-1.25956	FALSE
HLA-DMB	0.028677	-1.28171	FALSE
SGIP1	-0.159104	-1.29091	FALSE
ERG	-0.0621051	-1.29782	TRUE
ZDBF2	-0.0476658	-1.30553	FALSE
ACSS3	0.0828589	-1.31774	FALSE
PRSS2	0.0768219	-1.32522	FALSE
RNF180	0.00618482	-1.33278	TRUE
GIPC2	-0.0181827	-1.37214	TRUE
OR2L3	0.0046672	-1.39284	FALSE
GPR162	-0.0649112	-1.42774	FALSE
MIR21	0.158176	-1.52492	TRUE
PLA2R1	-0.0987639	-1.53625	FALSE
MIRLET7C	0.165453	-1.55576	FALSE
MIR10A	-0.0555764	-1.5639	TRUE
CFI	-0.0908909	-1.60188	FALSE
GPRIN3	-0.0958084	-1.61207	FALSE
DLK1	0.0753954	-1.61292	FALSE
SETBP1	-0.0205266	-1.64501	FALSE
HOXA3	0.0185276	-1.68803	FALSE
PIK3C2B	-0.140587	-1.70347	FALSE
COBLL1	-0.0486199	-1.76318	FALSE
CDH2	-0.0210732	-1.78889	TRUE
OR2L13	-0.0218205	-1.78902	FALSE
SYT1	-0.021105	-1.8926	FALSE
GPR146	-0.180299	-1.90408	FALSE
HOXA6	-0.1025	-1.94687	FALSE
TMEM71	0.216014	-1.96704	FALSE
OR2L2	-0.0106505	-2.00565	FALSE
PGM5	-0.128716	-2.0128	TRUE
OR2AK2	-0.0945839	-2.03773	FALSE
ZNF385D	-0.0882274	-2.066	FALSE
OR2L5	-0.0630166	-2.17662	FALSE
OR2L8	-0.0245661	-2.18665	FALSE
ADAM28	0.141535	-2.25806	FALSE
TCTEX1D1	0.055661	-2.26606	FALSE
HOXA4	0.0441157	-2.28954	FALSE
PLAG1	-0.104214	-2.47956	TRUE
ABI3BP	-0.109419	-2.54462	FALSE
CHRDL1	0.0954621	-3.13259	FALSE
CDH9	0.140662	-4.54763	FALSE

## Sheet: Table S4 - SummaRNAseq DE genes
Treatment	Number of DE genes	Number of DE TKIi genes
GO+IM	3789	57
GO	1268	19
CsA	695	9
IM	1118	17

## Sheet: Table S5 - RNAseq_Combo_DEG
geneid	logFC	logCPM	F	PValue	FDR	hgnc_symbol	chromosome_name	description	gene_biotype
ENSG00000106366	4.48107	3.48212	355.344	6.42377e-10	8.69971e-06	SERPINE1	7	serpin family E member 1 [Source:HGNC Symbol;Acc:HGNC:8583]	protein_coding
ENSG00000010278	3.55592	8.51616	253.489	4.0904e-09	2.6403e-05	CD9	12	CD9 molecule [Source:HGNC Symbol;Acc:HGNC:1709]	protein_coding
ENSG00000173083	3.27975	6.86329	237.365	5.8487e-09	2.6403e-05	HPSE	4	heparanase [Source:HGNC Symbol;Acc:HGNC:5164]	protein_coding
ENSG00000160013	3.27152	4.31855	213.827	1.03021e-08	3.48803e-05	PTGIR	19	prostaglandin I2 receptor [Source:HGNC Symbol;Acc:HGNC:9602]	protein_coding
ENSG00000085733	3.78666	5.8371	187.267	2.10595e-08	4.16906e-05	CTTN	11	cortactin [Source:HGNC Symbol;Acc:HGNC:3338]	protein_coding
ENSG00000088053	3.1571	5.7656	169.766	3.56267e-08	4.16906e-05	GP6	19	glycoprotein VI platelet [Source:HGNC Symbol;Acc:HGNC:14388]	protein_coding
ENSG00000101162	4.14747	7.40106	170.954	3.4324e-08	4.16906e-05	TUBB1	20	tubulin beta 1 class VI [Source:HGNC Symbol;Acc:HGNC:16257]	protein_coding
ENSG00000154146	2.98718	5.43181	172.915	3.22929e-08	4.16906e-05	NRGN	11	neurogranin [Source:HGNC Symbol;Acc:HGNC:8000]	protein_coding
ENSG00000163737	3.47508	10.2289	166.111	4.0019e-08	4.16906e-05	PF4	4	platelet factor 4 [Source:HGNC Symbol;Acc:HGNC:8861]	protein_coding
ENSG00000168497	2.80806	8.2466	193.616	1.76027e-08	4.16906e-05	CAVIN2	2	caveolae associated protein 2 [Source:HGNC Symbol;Acc:HGNC:10690]	protein_coding
ENSG00000169756	2.40797	8.51739	173.504	3.17104e-08	4.16906e-05	LIMS1	2	LIM zinc finger domain containing 1 [Source:HGNC Symbol;Acc:HGNC:6616]	protein_coding
ENSG00000180573	3.26172	6.93662	177.208	2.83196e-08	4.16906e-05	H2AC6	6	H2A clustered histone 6 [Source:HGNC Symbol;Acc:HGNC:4733]	protein_coding
ENSG00000187513	3.84093	3.45964	168.229	3.74008e-08	4.16906e-05	GJA4	1	gap junction protein alpha 4 [Source:HGNC Symbol;Acc:HGNC:4278]	protein_coding
ENSG00000119862	4.02186	6.54755	153.949	5.99925e-08	5.56041e-05	LGALSL	2	galectin like [Source:HGNC Symbol;Acc:HGNC:25012]	protein_coding
ENSG00000185052	2.01747	5.71325	153.191	6.15862e-08	5.56041e-05	SLC24A3	20	solute carrier family 24 member 3 [Source:HGNC Symbol;Acc:HGNC:10977]	protein_coding
ENSG00000107796	2.40923	4.05725	143.433	8.7288e-08	5.62925e-05	ACTA2	10	actin alpha 2, smooth muscle [Source:HGNC Symbol;Acc:HGNC:130]	protein_coding
ENSG00000128294	2.04206	7.59499	145.753	8.01859e-08	5.62925e-05	TPST2	22	tyrosylprotein sulfotransferase 2 [Source:HGNC Symbol;Acc:HGNC:12021]	protein_coding
ENSG00000138735	2.71958	5.03763	148.376	7.29564e-08	5.62925e-05	PDE5A	4	phosphodiesterase 5A [Source:HGNC Symbol;Acc:HGNC:8784]	protein_coding
ENSG00000143409	2.42974	5.76802	145.291	8.15426e-08	5.62925e-05	MINDY1	1	MINDY lysine 48 deubiquitinase 1 [Source:HGNC Symbol;Acc:HGNC:25648]	protein_coding
ENSG00000147443	2.21245	5.35912	144.378	8.43098e-08	5.62925e-05	DOK2	8	docking protein 2 [Source:HGNC Symbol;Acc:HGNC:2991]	protein_coding
ENSG00000197959	2.73416	5.32847	143.88	8.58635e-08	5.62925e-05	DNM3	1	dynamin 3 [Source:HGNC Symbol;Acc:HGNC:29125]	protein_coding
ENSG00000169224	1.96582	8.15526	140.642	9.68404e-08	5.96141e-05	GCSAML	1	germinal center associated signaling and motility like [Source:HGNC Symbol;Acc:HGNC:29583]	protein_coding
ENSG00000108839	3.26739	6.0237	133.925	1.25345e-07	6.06267e-05	ALOX12	17	arachidonate 12-lipoxygenase, 12S type [Source:HGNC Symbol;Acc:HGNC:429]	protein_coding
ENSG00000130513	4.50586	3.21615	135.14	1.19523e-07	6.06267e-05	GDF15	19	growth differentiation factor 15 [Source:HGNC Symbol;Acc:HGNC:30142]	protein_coding
ENSG00000149781	1.82953	9.0566	134.779	1.21221e-07	6.06267e-05	FERMT3	11	fermitin family member 3 [Source:HGNC Symbol;Acc:HGNC:23151]	protein_coding
ENSG00000150637	3.63523	4.87088	136.648	1.12735e-07	6.06267e-05	CD226	18	CD226 molecule [Source:HGNC Symbol;Acc:HGNC:16961]	protein_coding
ENSG00000169704	2.81042	6.82083	138.115	1.06566e-07	6.06267e-05	GP9	3	glycoprotein IX platelet [Source:HGNC Symbol;Acc:HGNC:4444]	protein_coding
ENSG00000198948	2.83429	4.56189	137.057	1.10976e-07	6.06267e-05	MFAP3L	4	microfibril associated protein 3 like [Source:HGNC Symbol;Acc:HGNC:29083]	protein_coding
ENSG00000137672	2.705	4.64115	132.975	1.30125e-07	6.07684e-05	TRPC6	11	transient receptor potential cation channel subfamily C member 6 [Source:HGNC Symbol;Acc:HGNC:12338]	protein_coding
ENSG00000124491	3.98198	9.30872	127.954	1.59282e-07	6.82696e-05	F13A1	6	coagulation factor XIII A chain [Source:HGNC Symbol;Acc:HGNC:3531]	protein_coding
ENSG00000127824	2.58619	7.32772	126.677	1.67886e-07	6.82696e-05	TUBA4A	2	tubulin alpha 4a [Source:HGNC Symbol;Acc:HGNC:12407]	protein_coding
ENSG00000145632	3.17208	4.40146	127.063	1.65228e-07	6.82696e-05	PLK2	5	polo like kinase 2 [Source:HGNC Symbol;Acc:HGNC:19699]	protein_coding
ENSG00000155366	2.68728	5.50309	128.698	1.54514e-07	6.82696e-05	RHOC	1	ras homolog family member C [Source:HGNC Symbol;Acc:HGNC:669]	protein_coding
ENSG00000174175	3.65411	7.47108	126.178	1.71392e-07	6.82696e-05	SELP	1	selectin P [Source:HGNC Symbol;Acc:HGNC:10721]	protein_coding
ENSG00000135679	2.1611	6.52489	124.422	1.84441e-07	7.13679e-05	MDM2	12	MDM2 proto-oncogene [Source:HGNC Symbol;Acc:HGNC:6973]	protein_coding
ENSG00000185245	2.90079	6.95045	122.335	2.01504e-07	7.58047e-05	GP1BA	17	glycoprotein Ib platelet subunit alpha [Source:HGNC Symbol;Acc:HGNC:4439]	protein_coding
ENSG00000139211	3.3178	3.57055	120.357	2.19416e-07	7.91822e-05	AMIGO2	12	adhesion molecule with Ig like domain 2 [Source:HGNC Symbol;Acc:HGNC:24073]	protein_coding
ENSG00000186834	1.98671	5.13811	120.069	2.22175e-07	7.91822e-05	HEXIM1	17	HEXIM P-TEFb complex subunit 1 [Source:HGNC Symbol;Acc:HGNC:24953]	protein_coding
ENSG00000130066	2.6049	9.07485	119.25	2.30252e-07	7.99566e-05	SAT1	X	spermidine/spermine N1-acetyltransferase 1 [Source:HGNC Symbol;Acc:HGNC:10540]	protein_coding
ENSG00000080546	1.69605	6.38551	117.343	2.5044e-07	8.20875e-05	SESN1	6	sestrin 1 [Source:HGNC Symbol;Acc:HGNC:21595]	protein_coding
ENSG00000138678	1.71906	5.84807	117.718	2.46312e-07	8.20875e-05	GPAT3	4	glycerol-3-phosphate acyltransferase 3 [Source:HGNC Symbol;Acc:HGNC:28157]	protein_coding
ENSG00000170476	-3.57312	5.62631	116.975	2.54572e-07	8.20875e-05	MZB1	5	marginal zone B and B1 cell specific protein [Source:HGNC Symbol;Acc:HGNC:30125]	protein_coding
ENSG00000112679	1.78796	6.09651	114.953	2.78755e-07	8.63209e-05	DUSP22	6	dual specificity phosphatase 22 [Source:HGNC Symbol;Acc:HGNC:16077]	protein_coding
ENSG00000160145	2.8604	6.34791	114.324	2.86823e-07	8.63209e-05	KALRN	3	kalirin RhoGEF kinase [Source:HGNC Symbol;Acc:HGNC:4814]	protein_coding
ENSG00000163464	3.40583	2.29821	114.349	2.86499e-07	8.63209e-05	CXCR1	2	C-X-C motif chemokine receptor 1 [Source:HGNC Symbol;Acc:HGNC:6026]	protein_coding
ENSG00000111644	2.68555	5.27467	112.967	3.05185e-07	8.98505e-05	ACRBP	12	acrosin binding protein [Source:HGNC Symbol;Acc:HGNC:17195]	protein_coding
ENSG00000113924	4.40693	4.34059	111.213	3.31005e-07	9.53788e-05	HGD	3	homogentisate 1,2-dioxygenase [Source:HGNC Symbol;Acc:HGNC:4892]	protein_coding
ENSG00000133317	2.96394	3.80925	106.207	4.20128e-07	0.000118537	LGALS12	11	galectin 12 [Source:HGNC Symbol;Acc:HGNC:15788]	protein_coding
ENSG00000196352	1.51048	7.71086	105.782	4.28908e-07	0.000118545	CD55	1	CD55 molecule (Cromer blood group) [Source:HGNC Symbol;Acc:HGNC:2665]	protein_coding
ENSG00000182747	2.91786	2.32399	104.929	4.47217e-07	0.000121133	SLC35D3	6	solute carrier family 35 member D3 [Source:HGNC Symbol;Acc:HGNC:15621]	protein_coding
ENSG00000153815	1.91471	4.04728	104.467	4.57528e-07	0.000121496	CMIP	16	c-Maf inducing protein [Source:HGNC Symbol;Acc:HGNC:24319]	protein_coding
ENSG00000166123	-1.89504	6.09825	103.525	4.79389e-07	0.000124853	GPT2	16	glutamic--pyruvic transaminase 2 [Source:HGNC Symbol;Acc:HGNC:18062]	protein_coding
ENSG00000157514	2.3479	5.84758	102.898	4.94646e-07	0.000126396	TSC22D3	X	TSC22 domain family member 3 [Source:HGNC Symbol;Acc:HGNC:3051]	protein_coding
ENSG00000110218	1.88148	4.8771	101.173	5.39609e-07	0.000128958	PANX1	11	pannexin 1 [Source:HGNC Symbol;Acc:HGNC:8599]	protein_coding
ENSG00000142669	1.97496	9.79174	100.906	5.46991e-07	0.000128958	SH3BGRL3	1	SH3 domain binding glutamate rich protein like 3 [Source:HGNC Symbol;Acc:HGNC:15568]	protein_coding
ENSG00000143622	2.04393	5.87644	101.828	5.21997e-07	0.000128958	RIT1	1	Ras like without CAAX 1 [Source:HGNC Symbol;Acc:HGNC:10023]	protein_coding
ENSG00000154217	1.9845	6.0822	101.561	5.29083e-07	0.000128958	PITPNC1	17	phosphatidylinositol transfer protein cytoplasmic 1 [Source:HGNC Symbol;Acc:HGNC:21045]	protein_coding
ENSG00000176783	1.80909	8.06109	100.717	5.52283e-07	0.000128958	RUFY1	5	RUN and FYVE domain containing 1 [Source:HGNC Symbol;Acc:HGNC:19760]	protein_coding
ENSG00000088726	4.66168	4.33159	98.4331	6.21329e-07	0.00014162	TMEM40	3	transmembrane protein 40 [Source:HGNC Symbol;Acc:HGNC:25620]	protein_coding
ENSG00000099785	2.36807	5.99697	98.246	6.27424e-07	0.00014162	MARCHF2	19	membrane associated ring-CH-type finger 2 [Source:HGNC Symbol;Acc:HGNC:28038]	protein_coding
ENSG00000160789	2.05312	8.34134	96.8951	6.73567e-07	0.000149543	LMNA	1	lamin A/C [Source:HGNC Symbol;Acc:HGNC:6636]	protein_coding
ENSG00000011105	4.06855	2.32345	96.1453	7.00901e-07	0.000153102	TSPAN9	12	tetraspanin 9 [Source:HGNC Symbol;Acc:HGNC:21640]	protein_coding
ENSG00000146592	2.662	2.08686	95.6207	7.20801e-07	0.000154949	CREB5	7	cAMP responsive element binding protein 5 [Source:HGNC Symbol;Acc:HGNC:16844]	protein_coding
ENSG00000047648	3.00222	4.90739	94.9325	7.47924e-07	0.000158268	ARHGAP6	X	Rho GTPase activating protein 6 [Source:HGNC Symbol;Acc:HGNC:676]	protein_coding
ENSG00000124762	5.19559	8.41056	93.4883	8.08842e-07	0.00016109	CDKN1A	6	cyclin dependent kinase inhibitor 1A [Source:HGNC Symbol;Acc:HGNC:1784]	protein_coding
ENSG00000161513	2.24851	5.22552	93.7844	7.95889e-07	0.00016109	FDXR	17	ferredoxin reductase [Source:HGNC Symbol;Acc:HGNC:3642]	protein_coding
ENSG00000164220	2.19496	4.5192	93.6349	8.02398e-07	0.00016109	F2RL2	5	coagulation factor II thrombin receptor like 2 [Source:HGNC Symbol;Acc:HGNC:3539]	protein_coding
ENSG00000188822	2.14866	4.2711	93.7672	7.96638e-07	0.00016109	CNR2	1	cannabinoid receptor 2 [Source:HGNC Symbol;Acc:HGNC:2160]	protein_coding
ENSG00000070190	3.32231	6.41943	92.6422	8.47245e-07	0.000166293	DAPP1	4	dual adaptor of phosphotyrosine and 3-phosphoinositides 1 [Source:HGNC Symbol;Acc:HGNC:16500]	protein_coding
ENSG00000197747	1.38547	7.26432	92.0608	8.74877e-07	0.000169264	S100A10	1	S100 calcium binding protein A10 [Source:HGNC Symbol;Acc:HGNC:10487]	protein_coding
ENSG00000134574	1.31487	6.72536	91.6624	8.94427e-07	0.000170609	DDB2	11	damage specific DNA binding protein 2 [Source:HGNC Symbol;Acc:HGNC:2718]	protein_coding
ENSG00000159339	2.43228	5.06997	90.849	9.35957e-07	0.000176051	PADI4	1	peptidyl arginine deiminase 4 [Source:HGNC Symbol;Acc:HGNC:18368]	protein_coding
ENSG00000023909	1.68319	6.37547	89.8077	9.92479e-07	0.000178068	GCLM	1	glutamate-cysteine ligase modifier subunit [Source:HGNC Symbol;Acc:HGNC:4312]	protein_coding
ENSG00000127314	1.99907	8.91006	89.7481	9.95834e-07	0.000178068	RAP1B	12	RAP1B, member of RAS oncogene family [Source:HGNC Symbol;Acc:HGNC:9857]	protein_coding
ENSG00000165702	1.81582	7.60002	89.8319	9.9112e-07	0.000178068	GFI1B	9	growth factor independent 1B transcriptional repressor [Source:HGNC Symbol;Acc:HGNC:4238]	protein_coding
ENSG00000179163	2.56967	7.29414	89.6872	9.99274e-07	0.000178068	FUCA1	1	alpha-L-fucosidase 1 [Source:HGNC Symbol;Acc:HGNC:4006]	protein_coding
ENSG00000198873	2.43688	1.62594	88.9288	1.04333e-06	0.000183504	GRK5	10	G protein-coupled receptor kinase 5 [Source:HGNC Symbol;Acc:HGNC:4544]	protein_coding
ENSG00000006652	1.39993	6.27863	86.7805	1.18111e-06	0.000197372	IFRD1	7	interferon related developmental regulator 1 [Source:HGNC Symbol;Acc:HGNC:5456]	protein_coding
ENSG00000076248	-1.52977	6.9138	86.5797	1.19504e-06	0.000197372	UNG	12	uracil DNA glycosylase [Source:HGNC Symbol;Acc:HGNC:12572]	protein_coding
ENSG00000081377	2.37722	3.09762	86.834	1.17742e-06	0.000197372	CDC14B	9	cell division cycle 14B [Source:HGNC Symbol;Acc:HGNC:1719]	protein_coding
ENSG00000129355	2.8568	6.41657	86.7274	1.18477e-06	0.000197372	CDKN2D	19	cyclin dependent kinase inhibitor 2D [Source:HGNC Symbol;Acc:HGNC:1790]	protein_coding
ENSG00000144354	-1.88098	7.47505	86.854	1.17605e-06	0.000197372	CDCA7	2	cell division cycle associated 7 [Source:HGNC Symbol;Acc:HGNC:14628]	protein_coding
ENSG00000110934	1.49021	8.22477	85.6998	1.25845e-06	0.00020534	BIN2	12	bridging integrator 2 [Source:HGNC Symbol;Acc:HGNC:1053]	protein_coding
ENSG00000176697	4.09339	4.3558	84.5859	1.34449e-06	0.000216768	BDNF	11	brain derived neurotrophic factor [Source:HGNC Symbol;Acc:HGNC:1033]	protein_coding
ENSG00000125726	5.12204	2.91228	83.9964	1.39282e-06	0.000221917	CD70	19	CD70 molecule [Source:HGNC Symbol;Acc:HGNC:11937]	protein_coding
ENSG00000102468	3.4605	2.70667	83.2473	1.45721e-06	0.000229477	HTR2A	13	5-hydroxytryptamine receptor 2A [Source:HGNC Symbol;Acc:HGNC:5293]	protein_coding
ENSG00000167671	1.97724	4.13241	82.8263	1.49494e-06	0.000232712	UBXN6	19	UBX domain protein 6 [Source:HGNC Symbol;Acc:HGNC:14928]	protein_coding
ENSG00000091317	1.34691	8.33013	82.1678	1.55627e-06	0.00023314	CMTM6	3	CKLF like MARVEL transmembrane domain containing 6 [Source:HGNC Symbol;Acc:HGNC:19177]	protein_coding
ENSG00000131236	1.33468	8.26381	81.8826	1.58376e-06	0.00023314	CAP1	1	cyclase associated actin cytoskeleton regulatory protein 1 [Source:HGNC Symbol;Acc:HGNC:20040]	protein_coding
ENSG00000138207	-5.77797	1.26445	81.9171	1.5804e-06	0.00023314	RBP4	10	retinol binding protein 4 [Source:HGNC Symbol;Acc:HGNC:9922]	protein_coding
ENSG00000163736	5.19436	10.94	82.3015	1.54359e-06	0.00023314	PPBP	4	pro-platelet basic protein [Source:HGNC Symbol;Acc:HGNC:9240]	protein_coding
ENSG00000165929	2.34178	5.21709	82.4222	1.53223e-06	0.00023314	TC2N	14	tandem C2 domains, nuclear [Source:HGNC Symbol;Acc:HGNC:19859]	protein_coding
ENSG00000019102	2.95739	1.79476	80.9605	1.6766e-06	0.000239855	VSIG2	11	V-set and immunoglobulin domain containing 2 [Source:HGNC Symbol;Acc:HGNC:17149]	protein_coding
ENSG00000069966	2.42034	6.67961	80.9039	1.68251e-06	0.000239855	GNB5	15	G protein subunit beta 5 [Source:HGNC Symbol;Acc:HGNC:4401]	protein_coding
ENSG00000082074	1.7475	7.32122	81.2426	1.64753e-06	0.000239855	FYB1	5	FYN binding protein 1 [Source:HGNC Symbol;Acc:HGNC:4036]	protein_coding
ENSG00000171502	2.45634	4.4842	80.015	1.77852e-06	0.000250901	COL24A1	1	collagen type XXIV alpha 1 chain [Source:HGNC Symbol;Acc:HGNC:20821]	protein_coding
ENSG00000148908	2.46407	6.26451	79.2406	1.86746e-06	0.000260392	RGS10	10	regulator of G protein signaling 10 [Source:HGNC Symbol;Acc:HGNC:9992]	protein_coding
ENSG00000198814	1.39214	5.96018	79.0993	1.88425e-06	0.000260392	GK	X	glycerol kinase [Source:HGNC Symbol;Acc:HGNC:4289]	protein_coding
ENSG00000100311	4.38621	1.90757	78.3322	1.97854e-06	0.000267743	PDGFB	22	platelet derived growth factor subunit B [Source:HGNC Symbol;Acc:HGNC:8800]	protein_coding
ENSG00000135218	3.1561	8.89669	78.4286	1.96639e-06	0.000267743	CD36	7	CD36 molecule [Source:HGNC Symbol;Acc:HGNC:1663]	protein_coding
ENSG00000146376	2.40538	6.46871	78.189	1.99675e-06	0.000267743	ARHGAP18	6	Rho GTPase activating protein 18 [Source:HGNC Symbol;Acc:HGNC:21035]	protein_coding
ENSG00000122786	3.58418	6.21781	77.9346	2.0296e-06	0.000269479	CALD1	7	caldesmon 1 [Source:HGNC Symbol;Acc:HGNC:1441]	protein_coding
ENSG00000170989	2.61119	3.44657	77.1108	2.14039e-06	0.00028143	S1PR1	1	sphingosine-1-phosphate receptor 1 [Source:HGNC Symbol;Acc:HGNC:3165]	protein_coding
ENSG00000173210	3.62039	3.98757	76.8904	2.17123e-06	0.00028274	ABLIM3	5	actin binding LIM protein family member 3 [Source:HGNC Symbol;Acc:HGNC:29132]	protein_coding
ENSG00000119801	1.65987	6.96996	76.2688	2.26107e-06	0.000291635	YPEL5	2	yippee like 5 [Source:HGNC Symbol;Acc:HGNC:18329]	protein_coding
ENSG00000149564	2.40412	6.54618	75.9419	2.31007e-06	0.000295144	ESAM	11	endothelial cell adhesion molecule [Source:HGNC Symbol;Acc:HGNC:17474]	protein_coding
ENSG00000100234	1.40969	7.68093	75.0802	2.44534e-06	0.00030064	TIMP3	22	TIMP metallopeptidase inhibitor 3 [Source:HGNC Symbol;Acc:HGNC:11822]	protein_coding
ENSG00000110315	1.30419	5.97956	75.2488	2.41814e-06	0.00030064	RNF141	11	ring finger protein 141 [Source:HGNC Symbol;Acc:HGNC:21159]	protein_coding
ENSG00000155158	1.72858	4.28892	75.5138	2.37613e-06	0.00030064	TTC39B	9	tetratricopeptide repeat domain 39B [Source:HGNC Symbol;Acc:HGNC:23704]	protein_coding
ENSG00000165233	2.10713	6.45276	74.9652	2.46408e-06	0.00030064	CARD19	9	caspase recruitment domain family member 19 [Source:HGNC Symbol;Acc:HGNC:28148]	protein_coding
ENSG00000182732	2.78564	5.29371	75.2241	2.42211e-06	0.00030064	RGS6	14	regulator of G protein signaling 6 [Source:HGNC Symbol;Acc:HGNC:10002]	protein_coding
ENSG00000124635	2.39311	2.51208	74.7443	2.50056e-06	0.000301436	H2BC11	6	H2B clustered histone 11 [Source:HGNC Symbol;Acc:HGNC:4761]	protein_coding
ENSG00000144677	1.58255	6.41849	74.6572	2.51512e-06	0.000301436	CTDSPL	3	CTD small phosphatase like [Source:HGNC Symbol;Acc:HGNC:16890]	protein_coding
ENSG00000092470	-1.42726	5.11637	74.1732	2.59789e-06	0.000306083	WDR76	15	WD repeat domain 76 [Source:HGNC Symbol;Acc:HGNC:25773]	protein_coding
ENSG00000100592	1.90309	6.56695	74.1662	2.5991e-06	0.000306083	DAAM1	14	dishevelled associated activator of morphogenesis 1 [Source:HGNC Symbol;Acc:HGNC:18142]	protein_coding
ENSG00000107833	-2.83767	3.86634	74.034	2.62227e-06	0.00030615	NPM3	10	nucleophosmin/nucleoplasmin 3 [Source:HGNC Symbol;Acc:HGNC:7931]	protein_coding
ENSG00000128266	3.09333	4.01527	73.5835	2.70309e-06	0.000312889	GNAZ	22	G protein subunit alpha z [Source:HGNC Symbol;Acc:HGNC:4395]	protein_coding
ENSG00000105223	1.80633	8.06465	73.3257	2.75064e-06	0.000313512	PLD3	19	phospholipase D family member 3 [Source:HGNC Symbol;Acc:HGNC:17158]	protein_coding
ENSG00000130830	1.21334	8.52176	73.3036	2.75477e-06	0.000313512	MPP1	X	membrane palmitoylated protein 1 [Source:HGNC Symbol;Acc:HGNC:7219]	protein_coding
ENSG00000105419	4.43243	0.083234	72.278	2.95434e-06	0.000325289	MEIS3	19	Meis homeobox 3 [Source:HGNC Symbol;Acc:HGNC:29537]	protein_coding
ENSG00000125952	1.22776	8.26503	72.3137	2.94711e-06	0.000325289	MAX	14	MYC associated factor X [Source:HGNC Symbol;Acc:HGNC:6913]	protein_coding
ENSG00000136603	2.72582	4.27156	72.3657	2.93663e-06	0.000325289	SKIL	3	SKI like proto-oncogene [Source:HGNC Symbol;Acc:HGNC:10897]	protein_coding
ENSG00000256235	2.01211	7.01797	72.4786	2.91401e-06	0.000325289	SMIM3	5	small integral membrane protein 3 [Source:HGNC Symbol;Acc:HGNC:30248]	protein_coding
ENSG00000155099	1.97624	5.68741	71.9509	3.02154e-06	0.000327366	PIP4P2	8	phosphatidylinositol-4,5-bisphosphate 4-phosphatase 2 [Source:HGNC Symbol;Acc:HGNC:25452]	protein_coding
ENSG00000162511	1.54243	9.7361	71.968	3.018e-06	0.000327366	LAPTM5	1	lysosomal protein transmembrane 5 [Source:HGNC Symbol;Acc:HGNC:29612]	protein_coding
ENSG00000065534	3.46386	6.497	71.7257	3.06885e-06	0.000329853	MYLK	3	myosin light chain kinase [Source:HGNC Symbol;Acc:HGNC:7590]	protein_coding
ENSG00000120594	1.88803	6.37955	71.5149	3.11394e-06	0.000331248	PLXDC2	10	plexin domain containing 2 [Source:HGNC Symbol;Acc:HGNC:21013]	protein_coding
ENSG00000162645	2.36352	4.27982	71.4329	3.13168e-06	0.000331248	GBP2	1	guanylate binding protein 2 [Source:HGNC Symbol;Acc:HGNC:4183]	protein_coding
ENSG00000172572	2.14433	4.47303	71.325	3.15521e-06	0.000331248	PDE3A	12	phosphodiesterase 3A [Source:HGNC Symbol;Acc:HGNC:8778]	protein_coding
ENSG00000116717	2.186	6.60396	70.8703	3.25668e-06	0.000339271	GADD45A	1	growth arrest and DNA damage inducible alpha [Source:HGNC Symbol;Acc:HGNC:4095]	protein_coding
ENSG00000164116	1.65552	6.68058	70.5639	3.32723e-06	0.000343974	GUCY1A1	4	guanylate cyclase 1 soluble subunit alpha 1 [Source:HGNC Symbol;Acc:HGNC:4685]	protein_coding
ENSG00000162614	3.72089	4.28014	70.4288	3.35892e-06	0.00034462	NEXN	1	nexilin F-actin binding protein [Source:HGNC Symbol;Acc:HGNC:29557]	protein_coding
ENSG00000125657	3.87407	2.73922	70.1573	3.42365e-06	0.000346019	TNFSF9	19	TNF superfamily member 9 [Source:HGNC Symbol;Acc:HGNC:11939]	protein_coding
ENSG00000162722	1.43055	6.94595	70.2011	3.41309e-06	0.000346019	TRIM58	1	tripartite motif containing 58 [Source:HGNC Symbol;Acc:HGNC:24150]	protein_coding
ENSG00000120885	2.01089	9.6583	69.677	3.54179e-06	0.000355307	CLU	8	clusterin [Source:HGNC Symbol;Acc:HGNC:2095]	protein_coding
ENSG00000131669	1.59656	5.96772	68.7926	3.77216e-06	0.000375635	NINJ1	9	ninjurin 1 [Source:HGNC Symbol;Acc:HGNC:7824]	protein_coding
ENSG00000135604	2.95955	6.37925	68.6739	3.8044e-06	0.000376081	STX11	6	syntaxin 11 [Source:HGNC Symbol;Acc:HGNC:11429]	protein_coding
ENSG00000101605	2.50976	3.75853	68.168	3.94548e-06	0.000382127	MYOM1	18	myomesin 1 [Source:HGNC Symbol;Acc:HGNC:7613]	protein_coding
ENSG00000185088	2.13063	8.50276	68.1514	3.95021e-06	0.000382127	RPS27L	15	ribosomal protein S27 like [Source:HGNC Symbol;Acc:HGNC:18476]	protein_coding
ENSG00000185630	1.66454	4.74934	68.3413	3.89649e-06	0.000382127	PBX1	1	PBX homeobox 1 [Source:HGNC Symbol;Acc:HGNC:8632]	protein_coding
ENSG00000108846	3.55925	4.51119	67.9238	4.0158e-06	0.000385716	ABCC3	17	ATP binding cassette subfamily C member 3 [Source:HGNC Symbol;Acc:HGNC:54]	protein_coding
ENSG00000185650	2.09358	4.86875	67.4172	4.16643e-06	0.000397366	ZFP36L1	14	ZFP36 ring finger protein like 1 [Source:HGNC Symbol;Acc:HGNC:1107]	protein_coding
ENSG00000164543	1.48705	6.23112	66.8762	4.33466e-06	0.00041052	STK17A	7	serine/threonine kinase 17a [Source:HGNC Symbol;Acc:HGNC:11395]	protein_coding
ENSG00000134548	2.82662	4.67308	66.6239	4.41584e-06	0.000412439	SPX	12	spexin hormone [Source:HGNC Symbol;Acc:HGNC:28139]	protein_coding
ENSG00000138798	3.21839	2.88684	66.704	4.38985e-06	0.000412439	EGF	4	epidermal growth factor [Source:HGNC Symbol;Acc:HGNC:3229]	protein_coding
ENSG00000184182	2.24645	6.04938	66.5124	4.45226e-06	0.000412993	UBE2F	2	ubiquitin conjugating enzyme E2 F (putative) [Source:HGNC Symbol;Acc:HGNC:12480]	protein_coding
ENSG00000171867	1.70834	7.27002	66.064	4.60247e-06	0.000424022	PRNP	20	prion protein [Source:HGNC Symbol;Acc:HGNC:9449]	protein_coding
ENSG00000132970	2.53176	2.23174	65.8421	4.67901e-06	0.000428161	WASF3	13	WASP family member 3 [Source:HGNC Symbol;Acc:HGNC:12734]	protein_coding
ENSG00000139970	2.27895	4.66251	65.6285	4.75407e-06	0.00043211	RTN1	14	reticulon 1 [Source:HGNC Symbol;Acc:HGNC:10467]	protein_coding
ENSG00000177508	4.91742	1.89396	65.5076	4.7972e-06	0.000433123	IRX3	16	iroquois homeobox 3 [Source:HGNC Symbol;Acc:HGNC:14360]	protein_coding
ENSG00000184500	2.02224	6.4393	65.1162	4.94e-06	0.000443062	PROS1	3	protein S [Source:HGNC Symbol;Acc:HGNC:9456]	protein_coding
ENSG00000085840	-1.47413	5.73448	64.8561	5.0377e-06	0.000445918	ORC1	1	origin recognition complex subunit 1 [Source:HGNC Symbol;Acc:HGNC:8487]	protein_coding
ENSG00000213316	2.31821	6.71983	64.8594	5.03644e-06	0.000445918	LTC4S	5	leukotriene C4 synthase [Source:HGNC Symbol;Acc:HGNC:6719]	protein_coding
ENSG00000145335	2.73065	7.63457	64.7392	5.08233e-06	0.000446948	SNCA	4	synuclein alpha [Source:HGNC Symbol;Acc:HGNC:11138]	protein_coding
ENSG00000205038	3.45896	4.56802	64.6498	5.11675e-06	0.000447072	PKHD1L1	8	PKHD1 like 1 [Source:HGNC Symbol;Acc:HGNC:20313]	protein_coding
ENSG00000136960	2.58525	7.08454	64.4566	5.19216e-06	0.000450752	ENPP2	8	ectonucleotide pyrophosphatase/phosphodiesterase 2 [Source:HGNC Symbol;Acc:HGNC:3357]	protein_coding
ENSG00000146859	1.48618	4.39268	64.3317	5.24158e-06	0.000452145	TMEM140	7	transmembrane protein 140 [Source:HGNC Symbol;Acc:HGNC:21870]	protein_coding
ENSG00000072952	3.46712	3.62317	64.1499	5.31453e-06	0.000455536	IRAG1	11	inositol 1,4,5-triphosphate receptor associated 1 [Source:HGNC Symbol;Acc:HGNC:7237]	protein_coding
ENSG00000100243	1.05176	7.50613	64.0246	5.3655e-06	0.000457013	CYB5R3	22	cytochrome b5 reductase 3 [Source:HGNC Symbol;Acc:HGNC:2873]	protein_coding
ENSG00000159348	1.2272	5.80849	63.6385	5.52622e-06	0.00046776	CYB5R1	1	cytochrome b5 reductase 1 [Source:HGNC Symbol;Acc:HGNC:13397]	protein_coding
ENSG00000026025	1.18445	8.06694	63.4534	5.6053e-06	0.000471507	VIM	10	vimentin [Source:HGNC Symbol;Acc:HGNC:12692]	protein_coding
ENSG00000137801	3.38512	9.87964	63.3167	5.66452e-06	0.000473032	THBS1	15	thrombospondin 1 [Source:HGNC Symbol;Acc:HGNC:11785]	protein_coding
ENSG00000163536	2.55009	4.69721	63.2509	5.69329e-06	0.000473032	SERPINI1	3	serpin family I member 1 [Source:HGNC Symbol;Acc:HGNC:8943]	protein_coding
ENSG00000115310	2.16012	8.36194	63.1081	5.75638e-06	0.000475357	RTN4	2	reticulon 4 [Source:HGNC Symbol;Acc:HGNC:14085]	protein_coding
ENSG00000101439	1.56345	6.88584	62.8008	5.89485e-06	0.000480928	CST3	20	cystatin C [Source:HGNC Symbol;Acc:HGNC:2475]	protein_coding
ENSG00000168411	-1.39249	6.57317	62.83	5.88149e-06	0.000480928	RFWD3	16	ring finger and WD repeat domain 3 [Source:HGNC Symbol;Acc:HGNC:25539]	protein_coding
ENSG00000115956	1.85124	10.3774	62.7189	5.93241e-06	0.000481094	PLEK	2	pleckstrin [Source:HGNC Symbol;Acc:HGNC:9070]	protein_coding
ENSG00000059728	1.77917	6.14731	62.2883	6.13464e-06	0.000483032	MXD1	2	MAX dimerization protein 1 [Source:HGNC Symbol;Acc:HGNC:6761]	protein_coding
ENSG00000100532	1.47	4.80824	62.4373	6.06374e-06	0.000483032	CGRRF1	14	cell growth regulator with ring finger domain 1 [Source:HGNC Symbol;Acc:HGNC:15528]	protein_coding
ENSG00000101000	2.6103	1.63247	62.3423	6.10883e-06	0.000483032	PROCR	20	protein C receptor [Source:HGNC Symbol;Acc:HGNC:9452]	protein_coding
ENSG00000109929	1.06794	6.93788	62.5121	6.02853e-06	0.000483032	SC5D	11	sterol-C5-desaturase [Source:HGNC Symbol;Acc:HGNC:10547]	protein_coding
ENSG00000173588	-1.16729	4.91785	62.5584	6.00683e-06	0.000483032	CEP83	12	centrosomal protein 83 [Source:HGNC Symbol;Acc:HGNC:17966]	protein_coding
ENSG00000115129	1.34297	4.42025	62.076	6.23732e-06	0.000488278	TP53I3	2	tumor protein p53 inducible protein 3 [Source:HGNC Symbol;Acc:HGNC:19373]	protein_coding
ENSG00000122643	1.66863	6.91699	61.8386	6.35452e-06	0.000494593	NT5C3A	7	5'-nucleotidase, cytosolic IIIA [Source:HGNC Symbol;Acc:HGNC:17820]	protein_coding
ENSG00000091972	2.25301	3.63772	61.5951	6.47746e-06	0.000498433	CD200	3	CD200 molecule [Source:HGNC Symbol;Acc:HGNC:7203]	protein_coding
ENSG00000113719	-1.64766	5.87831	61.6357	6.45676e-06	0.000498433	ERGIC1	5	endoplasmic reticulum-golgi intermediate compartment 1 [Source:HGNC Symbol;Acc:HGNC:29205]	protein_coding
ENSG00000064225	1.86926	6.02648	61.3821	6.58727e-06	0.000504019	ST3GAL6	3	ST3 beta-galactoside alpha-2,3-sialyltransferase 6 [Source:HGNC Symbol;Acc:HGNC:18080]	protein_coding
ENSG00000225528	2.64215	1.79789	61.0395	6.7686e-06	0.000514984		22	novel protein similar to translation machinery associated 7 homolog (S. cerevisiae) TMA7	protein_coding
ENSG00000150681	2.44024	7.54458	60.8552	6.86854e-06	0.000519668	RGS18	1	regulator of G protein signaling 18 [Source:HGNC Symbol;Acc:HGNC:14261]	protein_coding
ENSG00000030582	1.47281	8.68764	60.6156	7.00111e-06	0.000524833	GRN	17	granulin precursor [Source:HGNC Symbol;Acc:HGNC:4601]	protein_coding
ENSG00000196586	3.45602	2.05006	60.592	7.01431e-06	0.000524833	MYO6	6	myosin VI [Source:HGNC Symbol;Acc:HGNC:7605]	protein_coding
ENSG00000065833	2.39951	4.39832	59.8354	7.45404e-06	0.000543184	ME1	6	malic enzyme 1 [Source:HGNC Symbol;Acc:HGNC:6983]	protein_coding
ENSG00000100350	-1.22467	6.16848	59.9164	7.40547e-06	0.000543184	FOXRED2	22	FAD dependent oxidoreductase domain containing 2 [Source:HGNC Symbol;Acc:HGNC:26264]	protein_coding
ENSG00000163637	4.43818	2.39896	59.8254	7.4601e-06	0.000543184	PRICKLE2	3	prickle planar cell polarity protein 2 [Source:HGNC Symbol;Acc:HGNC:20340]	protein_coding
ENSG00000176463	1.04711	6.14818	59.9633	7.37751e-06	0.000543184	SLCO3A1	15	solute carrier organic anion transporter family member 3A1 [Source:HGNC Symbol;Acc:HGNC:10952]	protein_coding
ENSG00000271503	3.61301	4.64246	60.0744	7.31175e-06	0.000543184	CCL5	17	C-C motif chemokine ligand 5 [Source:HGNC Symbol;Acc:HGNC:10632]	protein_coding
ENSG00000182557	-2.59737	6.00943	59.7	7.53618e-06	0.000545789	SPNS3	17	sphingolipid transporter 3 (putative) [Source:HGNC Symbol;Acc:HGNC:28433]	protein_coding
ENSG00000164171	1.95443	4.12906	59.5391	7.63509e-06	0.000550011	ITGA2	5	integrin subunit alpha 2 [Source:HGNC Symbol;Acc:HGNC:6137]	protein_coding
ENSG00000143226	1.42997	6.53598	59.4305	7.7027e-06	0.000551945	FCGR2A	1	Fc fragment of IgG receptor IIa [Source:HGNC Symbol;Acc:HGNC:3616]	protein_coding
ENSG00000030066	-1.0385	7.1658	59.27	7.80399e-06	0.00055626	NUP160	11	nucleoporin 160 [Source:HGNC Symbol;Acc:HGNC:18017]	protein_coding
ENSG00000092531	1.4855	6.85508	58.922	8.02894e-06	0.000564439	SNAP23	15	synaptosome associated protein 23 [Source:HGNC Symbol;Acc:HGNC:11131]	protein_coding
ENSG00000125630	-1.48684	6.16786	58.928	8.02501e-06	0.000564439	POLR1B	2	RNA polymerase I subunit B [Source:HGNC Symbol;Acc:HGNC:20454]	protein_coding
ENSG00000127533	1.69746	5.35078	58.8995	8.04376e-06	0.000564439	F2RL3	19	F2R like thrombin or trypsin receptor 3 [Source:HGNC Symbol;Acc:HGNC:3540]	protein_coding
ENSG00000161921	4.17269	0.711201	58.7232	8.16088e-06	0.000569705	CXCL16	17	C-X-C motif chemokine ligand 16 [Source:HGNC Symbol;Acc:HGNC:16642]	protein_coding
ENSG00000180596	3.96491	3.69296	58.6117	8.23598e-06	0.000572	H2BC4	6	H2B clustered histone 4 [Source:HGNC Symbol;Acc:HGNC:4757]	protein_coding
ENSG00000166091	2.11874	6.36595	58.3502	8.41537e-06	0.000581476	CMTM5	14	CKLF like MARVEL transmembrane domain containing 5 [Source:HGNC Symbol;Acc:HGNC:19176]	protein_coding
ENSG00000110013	1.89905	3.85751	58.2623	8.47669e-06	0.00058274	SIAE	11	sialic acid acetylesterase [Source:HGNC Symbol;Acc:HGNC:18187]	protein_coding
ENSG00000138722	2.15261	8.11003	57.9633	8.68929e-06	0.000594339	MMRN1	4	multimerin 1 [Source:HGNC Symbol;Acc:HGNC:7178]	protein_coding
ENSG00000132274	1.52849	6.83049	57.8472	8.7735e-06	0.000597083	TRIM22	11	tripartite motif containing 22 [Source:HGNC Symbol;Acc:HGNC:16379]	protein_coding
ENSG00000100298	4.24643	2.93509	57.7817	8.82149e-06	0.000597347	APOBEC3H	22	apolipoprotein B mRNA editing enzyme catalytic subunit 3H [Source:HGNC Symbol;Acc:HGNC:24100]	protein_coding
ENSG00000043462	1.12159	7.46648	57.4278	9.0859e-06	0.000612191	LCP2	5	lymphocyte cytosolic protein 2 [Source:HGNC Symbol;Acc:HGNC:6529]	protein_coding
ENSG00000120057	-3.78364	0.730363	57.0227	9.40014e-06	0.000624767	SFRP5	10	secreted frizzled related protein 5 [Source:HGNC Symbol;Acc:HGNC:10779]	protein_coding
ENSG00000164512	3.96821	1.20574	57.0091	9.41095e-06	0.000624767	ANKRD55	5	ankyrin repeat domain 55 [Source:HGNC Symbol;Acc:HGNC:25681]	protein_coding
ENSG00000184574	1.819	5.94912	57.0899	9.34715e-06	0.000624767	LPAR5	12	lysophosphatidic acid receptor 5 [Source:HGNC Symbol;Acc:HGNC:13307]	protein_coding
ENSG00000059804	2.26796	8.25391	56.8921	9.50415e-06	0.000627876	SLC2A3	12	solute carrier family 2 member 3 [Source:HGNC Symbol;Acc:HGNC:11007]	protein_coding
ENSG00000105668	4.75715	-0.16272	56.7625	9.60871e-06	0.000631703	UPK1A	19	uroplakin 1A [Source:HGNC Symbol;Acc:HGNC:12577]	protein_coding
ENSG00000017260	1.52588	8.3741	56.3532	9.94793e-06	0.000644617	ATP2C1	3	ATPase secretory pathway Ca2+ transporting 1 [Source:HGNC Symbol;Acc:HGNC:13211]	protein_coding
ENSG00000060982	-1.49559	7.39462	56.3559	9.94569e-06	0.000644617	BCAT1	12	branched chain amino acid transaminase 1 [Source:HGNC Symbol;Acc:HGNC:976]	protein_coding
ENSG00000158457	2.04841	6.40153	56.4016	9.90709e-06	0.000644617	TSPAN33	7	tetraspanin 33 [Source:HGNC Symbol;Acc:HGNC:28743]	protein_coding
ENSG00000183813	3.3847	2.85414	56.1779	1.00976e-05	0.000651196	CCR4	3	C-C motif chemokine receptor 4 [Source:HGNC Symbol;Acc:HGNC:1605]	protein_coding
ENSG00000064601	1.35941	8.85576	55.9291	1.03144e-05	0.000653191	CTSA	20	cathepsin A [Source:HGNC Symbol;Acc:HGNC:9251]	protein_coding
ENSG00000102265	1.4819	7.81725	55.8972	1.03426e-05	0.000653191	TIMP1	X	TIMP metallopeptidase inhibitor 1 [Source:HGNC Symbol;Acc:HGNC:11820]	protein_coding
ENSG00000136492	-1.50689	4.88994	55.8668	1.03696e-05	0.000653191	BRIP1	17	BRCA1 interacting protein C-terminal helicase 1 [Source:HGNC Symbol;Acc:HGNC:20473]	protein_coding
ENSG00000186532	-1.23688	4.88915	55.8757	1.03617e-05	0.000653191	SMYD4	17	SET and MYND domain containing 4 [Source:HGNC Symbol;Acc:HGNC:21067]	protein_coding
ENSG00000196923	1.06474	5.69298	56.0207	1.0234e-05	0.000653191	PDLIM7	5	PDZ and LIM domain 7 [Source:HGNC Symbol;Acc:HGNC:22958]	protein_coding
ENSG00000136754	1.48631	7.50273	55.7707	1.04554e-05	0.000655543	ABI1	10	abl interactor 1 [Source:HGNC Symbol;Acc:HGNC:11320]	protein_coding
ENSG00000175538	1.39536	5.89689	55.6703	1.05459e-05	0.00065619	KCNE3	11	potassium voltage-gated channel subfamily E regulatory subunit 3 [Source:HGNC Symbol;Acc:HGNC:6243]	protein_coding
ENSG00000197329	1.16109	4.89084	55.6519	1.05626e-05	0.00065619	PELI1	2	pellino E3 ubiquitin protein ligase 1 [Source:HGNC Symbol;Acc:HGNC:8827]	protein_coding
ENSG00000162777	1.39546	5.1156	55.5415	1.06634e-05	0.000659426	DENND2D	1	DENN domain containing 2D [Source:HGNC Symbol;Acc:HGNC:26192]	protein_coding
ENSG00000111371	-1.25408	6.99273	55.1125	1.10658e-05	0.0006812	SLC38A1	12	solute carrier family 38 member 1 [Source:HGNC Symbol;Acc:HGNC:13447]	protein_coding
ENSG00000000971	1.86713	6.24249	54.8403	1.13304e-05	0.000694293	CFH	1	complement factor H [Source:HGNC Symbol;Acc:HGNC:4883]	protein_coding
ENSG00000162852	1.85324	7.31867	54.7892	1.1381e-05	0.000694293	CNST	1	consortin, connexin sorting protein [Source:HGNC Symbol;Acc:HGNC:26486]	protein_coding
ENSG00000108641	-1.65439	2.74548	54.4703	1.17022e-05	0.000710687	B9D1	17	B9 domain containing 1 [Source:HGNC Symbol;Acc:HGNC:24123]	protein_coding
ENSG00000104267	3.05096	7.20487	54.2064	1.19762e-05	0.000722184	CA2	8	carbonic anhydrase 2 [Source:HGNC Symbol;Acc:HGNC:1373]	protein_coding
ENSG00000106565	3.58794	3.91752	54.1351	1.20515e-05	0.000722184	TMEM176B	7	transmembrane protein 176B [Source:HGNC Symbol;Acc:HGNC:29596]	protein_coding
ENSG00000121964	1.36654	5.28703	54.1424	1.20438e-05	0.000722184	GTDC1	2	glycosyltransferase like domain containing 1 [Source:HGNC Symbol;Acc:HGNC:20887]	protein_coding
ENSG00000088826	2.26558	4.96985	54.0089	1.21861e-05	0.000727032	SMOX	20	spermine oxidase [Source:HGNC Symbol;Acc:HGNC:15862]	protein_coding
ENSG00000135318	5.72784	0.3709	53.7727	1.24429e-05	0.0007391	NT5E	6	5'-nucleotidase ecto [Source:HGNC Symbol;Acc:HGNC:8021]	protein_coding
ENSG00000198586	1.23928	6.69932	53.6603	1.25674e-05	0.000743233	TLK1	2	tousled like kinase 1 [Source:HGNC Symbol;Acc:HGNC:11841]	protein_coding
ENSG00000204428	1.93319	3.02813	53.5055	1.27412e-05	0.000750235	LY6G5C	6	lymphocyte antigen 6 family member G5C [Source:HGNC Symbol;Acc:HGNC:13932]	protein_coding
ENSG00000143333	2.28869	2.8855	53.3597	1.29075e-05	0.000756734	RGS16	1	regulator of G protein signaling 16 [Source:HGNC Symbol;Acc:HGNC:9997]	protein_coding
ENSG00000151023	5.88369	0.907253	53.1216	1.31846e-05	0.000766348	ENKUR	10	enkurin, TRPC channel interacting protein [Source:HGNC Symbol;Acc:HGNC:28388]	protein_coding
ENSG00000197461	4.25413	1.9415	53.1651	1.31334e-05	0.000766348	PDGFA	7	platelet derived growth factor subunit A [Source:HGNC Symbol;Acc:HGNC:8799]	protein_coding
ENSG00000166035	2.80961	1.94279	52.9216	1.34228e-05	0.000776857	LIPC	15	lipase C, hepatic type [Source:HGNC Symbol;Acc:HGNC:6619]	protein_coding
ENSG00000082516	-1.4653	5.46128	52.6395	1.37673e-05	0.000788965	GEMIN5	5	gem nuclear organelle associated protein 5 [Source:HGNC Symbol;Acc:HGNC:20043]	protein_coding
ENSG00000101460	1.57438	2.51533	52.561	1.3865e-05	0.000788965	MAP1LC3A	20	microtubule associated protein 1 light chain 3 alpha [Source:HGNC Symbol;Acc:HGNC:6838]	protein_coding
ENSG00000131370	3.84774	4.55884	52.5899	1.3829e-05	0.000788965	SH3BP5	3	SH3 domain binding protein 5 [Source:HGNC Symbol;Acc:HGNC:10827]	protein_coding
ENSG00000143179	-1.05144	6.51542	52.6476	1.37573e-05	0.000788965	UCK2	1	uridine-cytidine kinase 2 [Source:HGNC Symbol;Acc:HGNC:12562]	protein_coding
ENSG00000041353	1.78065	7.6068	52.496	1.39466e-05	0.000790287	RAB27B	18	RAB27B, member RAS oncogene family [Source:HGNC Symbol;Acc:HGNC:9767]	protein_coding
ENSG00000123213	-1.22973	5.85287	52.3919	1.40784e-05	0.000794433	NLN	5	neurolysin [Source:HGNC Symbol;Acc:HGNC:16058]	protein_coding
ENSG00000136156	1.21727	9.29222	52.3304	1.41569e-05	0.000795549	ITM2B	13	integral membrane protein 2B [Source:HGNC Symbol;Acc:HGNC:6174]	protein_coding
ENSG00000127920	4.49053	5.62197	52.2823	1.42187e-05	0.000795716	GNG11	7	G protein subunit gamma 11 [Source:HGNC Symbol;Acc:HGNC:4403]	protein_coding
ENSG00000147650	2.06995	5.55053	52.2021	1.43223e-05	0.00079822	LRP12	8	LDL receptor related protein 12 [Source:HGNC Symbol;Acc:HGNC:31708]	protein_coding
ENSG00000127249	2.78759	2.46623	51.7326	1.49478e-05	0.000829664	ATP13A4	3	ATPase 13A4 [Source:HGNC Symbol;Acc:HGNC:25422]	protein_coding
ENSG00000115318	1.76825	5.04946	51.2637	1.56047e-05	0.000861285	LOXL3	2	lysyl oxidase like 3 [Source:HGNC Symbol;Acc:HGNC:13869]	protein_coding
ENSG00000185532	1.74267	3.7887	51.2359	1.56447e-05	0.000861285	PRKG1	10	protein kinase cGMP-dependent 1 [Source:HGNC Symbol;Acc:HGNC:9414]	protein_coding
ENSG00000005469	2.61969	5.5948	51.174	1.57341e-05	0.000862702	CROT	7	carnitine O-octanoyltransferase [Source:HGNC Symbol;Acc:HGNC:2366]	protein_coding
ENSG00000078902	0.955929	6.1923	50.8403	1.62272e-05	0.000871254	TOLLIP	11	toll interacting protein [Source:HGNC Symbol;Acc:HGNC:16476]	protein_coding
ENSG00000126091	-1.51896	4.28694	50.8609	1.61962e-05	0.000871254	ST3GAL3	1	ST3 beta-galactoside alpha-2,3-sialyltransferase 3 [Source:HGNC Symbol;Acc:HGNC:10866]	protein_coding
ENSG00000138166	2.6766	2.18297	50.8436	1.62223e-05	0.000871254	DUSP5	10	dual specificity phosphatase 5 [Source:HGNC Symbol;Acc:HGNC:3071]	protein_coding
ENSG00000153714	4.30185	1.51338	50.723	1.64048e-05	0.000871254	LURAP1L	9	leucine rich adaptor protein 1 like [Source:HGNC Symbol;Acc:HGNC:31452]	protein_coding
ENSG00000182253	3.55891	1.41167	50.7702	1.63331e-05	0.000871254	SYNM	15	synemin [Source:HGNC Symbol;Acc:HGNC:24466]	protein_coding
ENSG00000196188	-5.93675	-0.391954	50.7955	1.62948e-05	0.000871254	CTSE	1	cathepsin E [Source:HGNC Symbol;Acc:HGNC:2530]	protein_coding
ENSG00000228672	-2.27305	3.16988	50.8454	1.62196e-05	0.000871254	PROB1	5	proline rich basic protein 1 [Source:HGNC Symbol;Acc:HGNC:41906]	protein_coding
ENSG00000278828	2.80151	4.163	50.7557	1.63551e-05	0.000871254	H3C10	6	H3 clustered histone 10 [Source:HGNC Symbol;Acc:HGNC:4775]	protein_coding
ENSG00000180354	1.46038	6.15228	50.5559	1.66618e-05	0.000881449	MTURN	7	maturin, neural progenitor differentiation regulator homolog [Source:HGNC Symbol;Acc:HGNC:25457]	protein_coding
ENSG00000135709	2.51728	4.15655	49.881	1.7749e-05	0.000935312	KIAA0513	16	KIAA0513 [Source:HGNC Symbol;Acc:HGNC:29058]	protein_coding
ENSG00000137507	2.89737	5.17673	49.5383	1.83331e-05	0.000962346	LRRC32	11	leucine rich repeat containing 32 [Source:HGNC Symbol;Acc:HGNC:4161]	protein_coding
ENSG00000072042	1.24673	7.4929	49.4337	1.85157e-05	0.000965561	RDH11	14	retinol dehydrogenase 11 [Source:HGNC Symbol;Acc:HGNC:17964]	protein_coding
ENSG00000164362	-5.69658	0.251518	49.4217	1.85369e-05	0.000965561	TERT	5	telomerase reverse transcriptase [Source:HGNC Symbol;Acc:HGNC:11730]	protein_coding
ENSG00000168386	1.75421	4.27617	49.3315	1.86964e-05	0.000970137	FILIP1L	3	filamin A interacting protein 1 like [Source:HGNC Symbol;Acc:HGNC:24589]	protein_coding
ENSG00000167513	-1.68075	5.94528	49.291	1.87685e-05	0.000970157	CDT1	16	chromatin licensing and DNA replication factor 1 [Source:HGNC Symbol;Acc:HGNC:24576]	protein_coding
ENSG00000162599	-1.03044	5.41835	49.1706	1.8985e-05	0.000977619	NFIA	1	nuclear factor I A [Source:HGNC Symbol;Acc:HGNC:7784]	protein_coding
ENSG00000167996	2.16498	9.54213	49.0088	1.92804e-05	0.000989072	FTH1	11	ferritin heavy chain 1 [Source:HGNC Symbol;Acc:HGNC:3976]	protein_coding
ENSG00000167641	2.74233	4.26404	48.8938	1.94937e-05	0.00099624	PPP1R14A	19	protein phosphatase 1 regulatory inhibitor subunit 14A [Source:HGNC Symbol;Acc:HGNC:14871]	protein_coding
ENSG00000110660	-1.08959	5.39363	48.8246	1.96234e-05	0.000999095	SLC35F2	11	solute carrier family 35 member F2 [Source:HGNC Symbol;Acc:HGNC:23615]	protein_coding
ENSG00000003436	1.42644	5.51614	48.3945	2.04526e-05	0.00100227	TFPI	2	tissue factor pathway inhibitor [Source:HGNC Symbol;Acc:HGNC:11760]	protein_coding
ENSG00000074416	1.45263	6.58265	48.3395	2.05616e-05	0.00100227	MGLL	3	monoglyceride lipase [Source:HGNC Symbol;Acc:HGNC:17038]	protein_coding
ENSG00000100473	1.56332	5.94497	48.5142	2.02177e-05	0.00100227	COCH	14	cochlin [Source:HGNC Symbol;Acc:HGNC:2180]	protein_coding
ENSG00000103522	3.15697	4.48195	48.7315	1.97995e-05	0.00100227	IL21R	16	interleukin 21 receptor [Source:HGNC Symbol;Acc:HGNC:6006]	protein_coding
ENSG00000113389	-1.37573	4.67862	48.2962	2.06478e-05	0.00100227	NPR3	5	natriuretic peptide receptor 3 [Source:HGNC Symbol;Acc:HGNC:7945]	protein_coding
ENSG00000118515	2.33881	4.17721	48.592	2.00669e-05	0.00100227	SGK1	6	serum/glucocorticoid regulated kinase 1 [Source:HGNC Symbol;Acc:HGNC:10810]	protein_coding
ENSG00000135334	1.09337	5.66273	48.4341	2.03746e-05	0.00100227	AKIRIN2	6	akirin 2 [Source:HGNC Symbol;Acc:HGNC:21407]	protein_coding
ENSG00000158869	2.04756	7.96743	48.2991	2.06422e-05	0.00100227	FCER1G	1	Fc fragment of IgE receptor Ig [Source:HGNC Symbol;Acc:HGNC:3611]	protein_coding
ENSG00000165682	4.24898	6.35543	48.3405	2.05595e-05	0.00100227	CLEC1B	12	C-type lectin domain family 1 member B [Source:HGNC Symbol;Acc:HGNC:24356]	protein_coding
ENSG00000204642	2.08376	3.73173	48.3421	2.05565e-05	0.00100227	HLA-F	6	major histocompatibility complex, class I, F [Source:HGNC Symbol;Acc:HGNC:4963]	protein_coding
ENSG00000205542	2.04699	12.5773	48.6854	1.98874e-05	0.00100227	TMSB4X	X	thymosin beta 4 X-linked [Source:HGNC Symbol;Acc:HGNC:11881]	protein_coding
ENSG00000236320	2.53883	1.51401	48.4314	2.038e-05	0.00100227	SLFN14	17	schlafen family member 14 [Source:HGNC Symbol;Acc:HGNC:32689]	protein_coding
ENSG00000266074	-1.80259	3.3873	48.6292	1.99951e-05	0.00100227	BAHCC1	17	BAH domain and coiled-coil containing 1 [Source:HGNC Symbol;Acc:HGNC:29279]	protein_coding
ENSG00000184113	5.28686	4.68207	48.2336	2.07735e-05	0.00100477	CLDN5	22	claudin 5 [Source:HGNC Symbol;Acc:HGNC:2047]	protein_coding
ENSG00000153064	1.54289	4.92995	48.1357	2.09714e-05	0.00101073	BANK1	4	B cell scaffold protein with ankyrin repeats 1 [Source:HGNC Symbol;Acc:HGNC:18233]	protein_coding
ENSG00000213625	0.999973	6.8085	48.0227	2.12028e-05	0.00101826	LEPROT	1	leptin receptor overlapping transcript [Source:HGNC Symbol;Acc:HGNC:29477]	protein_coding
ENSG00000135929	3.23749	2.87721	47.9717	2.13082e-05	0.00101971	CYP27A1	2	cytochrome P450 family 27 subfamily A member 1 [Source:HGNC Symbol;Acc:HGNC:2605]	protein_coding
ENSG00000148019	-1.26963	5.16525	47.9004	2.14567e-05	0.0010232	CEP78	9	centrosomal protein 78 [Source:HGNC Symbol;Acc:HGNC:25740]	protein_coding
ENSG00000147100	-4.46528	0.697122	47.668	2.19488e-05	0.00104299	SLC16A2	X	solute carrier family 16 member 2 [Source:HGNC Symbol;Acc:HGNC:10923]	protein_coding
ENSG00000140749	2.68165	2.93141	47.5407	2.22241e-05	0.00105238	IGSF6	16	immunoglobulin superfamily member 6 [Source:HGNC Symbol;Acc:HGNC:5953]	protein_coding
ENSG00000027869	2.63459	3.23095	47.2	2.2981e-05	0.00108066	SH2D2A	1	SH2 domain containing 2A [Source:HGNC Symbol;Acc:HGNC:10821]	protein_coding
ENSG00000119630	4.20763	2.05365	47.2246	2.29254e-05	0.00108066	PGF	14	placental growth factor [Source:HGNC Symbol;Acc:HGNC:8893]	protein_coding
ENSG00000150938	1.43381	4.59041	47.0422	2.3342e-05	0.00109384	CRIM1	2	cysteine rich transmembrane BMP regulator 1 [Source:HGNC Symbol;Acc:HGNC:2359]	protein_coding
ENSG00000170142	-1.16661	4.93438	46.8399	2.38144e-05	0.00110873	UBE2E1	3	ubiquitin conjugating enzyme E2 E1 [Source:HGNC Symbol;Acc:HGNC:12477]	protein_coding
ENSG00000204424	4.01343	2.39752	46.836	2.38235e-05	0.00110873	LY6G6F	6	lymphocyte antigen 6 family member G6F [Source:HGNC Symbol;Acc:HGNC:13933]	protein_coding
ENSG00000168754	-4.66117	2.536	46.79	2.39326e-05	0.00111	FAM178B	2	family with sequence similarity 178 member B [Source:HGNC Symbol;Acc:HGNC:28036]	protein_coding
ENSG00000167460	1.45429	9.8301	46.6878	2.4177e-05	0.0011175	TPM4	19	tropomyosin 4 [Source:HGNC Symbol;Acc:HGNC:12013]	protein_coding
ENSG00000111679	1.80971	9.01964	46.3905	2.49046e-05	0.00114425	PTPN6	12	protein tyrosine phosphatase non-receptor type 6 [Source:HGNC Symbol;Acc:HGNC:9658]	protein_coding
ENSG00000203685	3.88285	1.71923	46.3825	2.49245e-05	0.00114425	STUM	1	stum, mechanosensory transduction mediator homolog [Source:HGNC Symbol;Acc:HGNC:30491]	protein_coding
ENSG00000085514	2.62322	4.7143	46.317	2.50884e-05	0.00114788	PILRA	7	paired immunoglobin like type 2 receptor alpha [Source:HGNC Symbol;Acc:HGNC:20396]	protein_coding
ENSG00000119408	0.988262	6.25343	46.2728	2.51998e-05	0.00114909	NEK6	9	NIMA related kinase 6 [Source:HGNC Symbol;Acc:HGNC:7749]	protein_coding
ENSG00000134590	1.2819	4.98818	46.134	2.55531e-05	0.0011613	RTL8C	X	retrotransposon Gag like 8C [Source:HGNC Symbol;Acc:HGNC:2569]	protein_coding
ENSG00000085999	-1.77989	5.39349	46.0987	2.56439e-05	0.00116152	RAD54L	1	RAD54 like [Source:HGNC Symbol;Acc:HGNC:9826]	protein_coding
ENSG00000101335	3.22419	2.63259	45.969	2.59808e-05	0.00117286	MYL9	20	myosin light chain 9 [Source:HGNC Symbol;Acc:HGNC:15754]	protein_coding
ENSG00000165821	2.36633	3.47558	45.9076	2.61423e-05	0.00117623	SALL2	14	spalt like transcription factor 2 [Source:HGNC Symbol;Acc:HGNC:10526]	protein_coding
ENSG00000011600	1.38593	6.97357	45.829	2.63504e-05	0.00118167	TYROBP	19	transmembrane immune signaling adaptor TYROBP [Source:HGNC Symbol;Acc:HGNC:12449]	protein_coding
ENSG00000026103	1.69223	4.97351	45.6036	2.69585e-05	0.00119704	FAS	10	Fas cell surface death receptor [Source:HGNC Symbol;Acc:HGNC:11920]	protein_coding
ENSG00000123610	4.30245	3.10212	45.6338	2.68759e-05	0.00119704	TNFAIP6	2	TNF alpha induced protein 6 [Source:HGNC Symbol;Acc:HGNC:11898]	protein_coding
ENSG00000206052	3.02205	2.51509	45.6535	2.68225e-05	0.00119704	DOK6	18	docking protein 6 [Source:HGNC Symbol;Acc:HGNC:28301]	protein_coding
ENSG00000163092	2.36824	3.02181	45.5421	2.71273e-05	0.00120061	XIRP2	2	xin actin binding repeat containing 2 [Source:HGNC Symbol;Acc:HGNC:14303]	protein_coding
ENSG00000061676	2.6441	4.29133	45.5063	2.72261e-05	0.00120105	NCKAP1	2	NCK associated protein 1 [Source:HGNC Symbol;Acc:HGNC:7666]	protein_coding
ENSG00000256043	1.65321	4.11088	45.4425	2.74032e-05	0.00120494	CTSO	4	cathepsin O [Source:HGNC Symbol;Acc:HGNC:2542]	protein_coding
ENSG00000104490	-3.65992	2.87491	45.1952	2.8103e-05	0.00123171	NCALD	8	neurocalcin delta [Source:HGNC Symbol;Acc:HGNC:7655]	protein_coding
ENSG00000134108	1.08657	8.11319	45.1594	2.82058e-05	0.00123223	ARL8B	3	ADP ribosylation factor like GTPase 8B [Source:HGNC Symbol;Acc:HGNC:25564]	protein_coding
ENSG00000166974	1.62508	8.5754	44.9888	2.87029e-05	0.00124591	MAPRE2	18	microtubule associated protein RP/EB family member 2 [Source:HGNC Symbol;Acc:HGNC:6891]	protein_coding
ENSG00000198346	-1.45623	4.17312	44.9972	2.86781e-05	0.00124591	ZNF813	19	zinc finger protein 813 [Source:HGNC Symbol;Acc:HGNC:33257]	protein_coding
ENSG00000203710	2.10744	5.52481	44.8702	2.90545e-05	0.00125714	CR1	1	complement C3b/C4b receptor 1 (Knops blood group) [Source:HGNC Symbol;Acc:HGNC:2334]	protein_coding
ENSG00000125744	1.84693	4.16439	44.8153	2.92189e-05	0.00126023	RTN2	19	reticulon 2 [Source:HGNC Symbol;Acc:HGNC:10468]	protein_coding
ENSG00000159189	4.21733	1.24602	44.744	2.94342e-05	0.00126549	C1QC	1	complement C1q C chain [Source:HGNC Symbol;Acc:HGNC:1245]	protein_coding
ENSG00000082781	2.80149	4.9793	44.6011	2.98711e-05	0.00127207	ITGB5	3	integrin subunit beta 5 [Source:HGNC Symbol;Acc:HGNC:6160]	protein_coding
ENSG00000112972	-1.327	8.64262	44.5882	2.9911e-05	0.00127207	HMGCS1	5	3-hydroxy-3-methylglutaryl-CoA synthase 1 [Source:HGNC Symbol;Acc:HGNC:5007]	protein_coding
ENSG00000130751	-2.00253	1.92081	44.5714	2.99631e-05	0.00127207	NPAS1	19	neuronal PAS domain protein 1 [Source:HGNC Symbol;Acc:HGNC:7894]	protein_coding
ENSG00000277632	5.68741	2.56506	44.6216	2.9808e-05	0.00127207	CCL3	17	C-C motif chemokine ligand 3 [Source:HGNC Symbol;Acc:HGNC:10627]	protein_coding
ENSG00000092445	-1.23713	3.69057	44.4985	3.01897e-05	0.00127768	TYRO3	15	TYRO3 protein tyrosine kinase [Source:HGNC Symbol;Acc:HGNC:12446]	protein_coding
ENSG00000076944	0.975345	6.46177	44.3874	3.05392e-05	0.00128577	STXBP2	19	syntaxin binding protein 2 [Source:HGNC Symbol;Acc:HGNC:11445]	protein_coding
ENSG00000263264	-1.62953	3.31593	44.3775	3.05706e-05	0.00128577		19	novel protein	protein_coding
ENSG00000104738	-1.74064	8.3192	44.2323	3.10349e-05	0.00130125	MCM4	8	minichromosome maintenance complex component 4 [Source:HGNC Symbol;Acc:HGNC:6947]	protein_coding
ENSG00000134955	2.72485	1.59534	44.1239	3.1387e-05	0.00131196	SLC37A2	11	solute carrier family 37 member 2 [Source:HGNC Symbol;Acc:HGNC:20644]	protein_coding
ENSG00000174132	1.27437	3.37208	44.055	3.16134e-05	0.00131735	FAM174A	5	family with sequence similarity 174 member A [Source:HGNC Symbol;Acc:HGNC:24943]	protein_coding
ENSG00000136231	2.02897	3.03952	43.9633	3.19172e-05	0.00132593	IGF2BP3	7	insulin like growth factor 2 mRNA binding protein 3 [Source:HGNC Symbol;Acc:HGNC:28868]	protein_coding
ENSG00000198885	-1.67124	4.66426	43.6106	3.31196e-05	0.00137168	ITPRIPL1	2	ITPRIP like 1 [Source:HGNC Symbol;Acc:HGNC:29371]	protein_coding
ENSG00000187741	-1.35311	5.54402	43.4295	3.37576e-05	0.00139384	FANCA	16	FA complementation group A [Source:HGNC Symbol;Acc:HGNC:3582]	protein_coding
ENSG00000166197	-1.26028	7.7655	43.0619	3.50974e-05	0.00144286	NOLC1	10	nucleolar and coiled-body phosphoprotein 1 [Source:HGNC Symbol;Acc:HGNC:15608]	protein_coding
ENSG00000183255	1.12067	8.77894	43.0458	3.51578e-05	0.00144286	PTTG1IP	21	PTTG1 interacting protein [Source:HGNC Symbol;Acc:HGNC:13524]	protein_coding
ENSG00000110799	2.28226	7.1911	42.9776	3.54137e-05	0.00144897	VWF	12	von Willebrand factor [Source:HGNC Symbol;Acc:HGNC:12726]	protein_coding
ENSG00000142207	-1.24661	4.90349	42.9177	3.56403e-05	0.00144948	URB1	21	URB1 ribosome biogenesis homolog [Source:HGNC Symbol;Acc:HGNC:17344]	protein_coding
ENSG00000149177	1.95061	4.63176	42.9376	3.55648e-05	0.00144948	PTPRJ	11	protein tyrosine phosphatase receptor type J [Source:HGNC Symbol;Acc:HGNC:9673]	protein_coding
ENSG00000168671	-4.39223	3.19977	42.8862	3.57601e-05	0.00145	UGT3A2	5	UDP glycosyltransferase family 3 member A2 [Source:HGNC Symbol;Acc:HGNC:27266]	protein_coding
ENSG00000183019	3.87214	4.37788	42.7664	3.62205e-05	0.00146428	MCEMP1	19	mast cell expressed membrane protein 1 [Source:HGNC Symbol;Acc:HGNC:27291]	protein_coding
ENSG00000131100	1.20758	7.28057	42.7029	3.6467e-05	0.00146986	ATP6V1E1	22	ATPase H+ transporting V1 subunit E1 [Source:HGNC Symbol;Acc:HGNC:857]	protein_coding
ENSG00000213085	3.12425	1.80611	42.5989	3.68753e-05	0.00148191	CFAP45	1	cilia and flagella associated protein 45 [Source:HGNC Symbol;Acc:HGNC:17229]	protein_coding
ENSG00000196562	3.17949	3.9838	42.5448	3.70901e-05	0.00148613	SULF2	20	sulfatase 2 [Source:HGNC Symbol;Acc:HGNC:20392]	protein_coding
ENSG00000101017	2.08287	3.81272	42.4604	3.74278e-05	0.00148891	CD40	20	CD40 molecule [Source:HGNC Symbol;Acc:HGNC:11919]	protein_coding
ENSG00000121594	3.23968	0.888018	42.4451	3.74894e-05	0.00148891	CD80	3	CD80 molecule [Source:HGNC Symbol;Acc:HGNC:1700]	protein_coding
ENSG00000139174	1.92912	3.75251	42.4928	3.72977e-05	0.00148891	PRICKLE1	12	prickle planar cell polarity protein 1 [Source:HGNC Symbol;Acc:HGNC:17019]	protein_coding
ENSG00000140479	3.52499	5.10089	42.2152	3.84297e-05	0.00152179	PCSK6	15	proprotein convertase subtilisin/kexin type 6 [Source:HGNC Symbol;Acc:HGNC:8569]	protein_coding
ENSG00000091127	-1.27929	5.37173	42.1091	3.88731e-05	0.00152416	PUS7	7	pseudouridine synthase 7 [Source:HGNC Symbol;Acc:HGNC:26033]	protein_coding
ENSG00000112576	1.64457	8.98081	42.0993	3.89141e-05	0.00152416	CCND3	6	cyclin D3 [Source:HGNC Symbol;Acc:HGNC:1585]	protein_coding
ENSG00000156642	1.08169	5.95932	42.1559	3.86767e-05	0.00152416	NPTN	15	neuroplastin [Source:HGNC Symbol;Acc:HGNC:17867]	protein_coding
ENSG00000171476	2.32631	5.32071	42.0932	3.89396e-05	0.00152416	HOPX	4	HOP homeobox [Source:HGNC Symbol;Acc:HGNC:24961]	protein_coding
ENSG00000183166	-1.56752	3.55558	41.8885	3.98138e-05	0.00154942	CALN1	7	calneuron 1 [Source:HGNC Symbol;Acc:HGNC:13248]	protein_coding
ENSG00000204977	1.46543	6.75799	41.913	3.9708e-05	0.00154942	TRIM13	13	tripartite motif containing 13 [Source:HGNC Symbol;Acc:HGNC:9976]	protein_coding
ENSG00000141232	1.70077	4.07357	41.8447	4.0004e-05	0.00155047	TOB1	17	transducer of ERBB2, 1 [Source:HGNC Symbol;Acc:HGNC:11979]	protein_coding
ENSG00000161911	4.41392	4.642	41.8296	4.00698e-05	0.00155047	TREML1	6	triggering receptor expressed on myeloid cells like 1 [Source:HGNC Symbol;Acc:HGNC:20434]	protein_coding
ENSG00000130768	-1.99592	3.41489	41.7993	4.02022e-05	0.00155116	SMPDL3B	1	sphingomyelin phosphodiesterase acid like 3B [Source:HGNC Symbol;Acc:HGNC:21416]	protein_coding
ENSG00000129173	-1.91229	4.69362	41.7477	4.04288e-05	0.00155547	E2F8	11	E2F transcription factor 8 [Source:HGNC Symbol;Acc:HGNC:24727]	protein_coding
ENSG00000080839	-1.04877	5.80286	41.6209	4.09915e-05	0.00157266	RBL1	20	RB transcriptional corepressor like 1 [Source:HGNC Symbol;Acc:HGNC:9893]	protein_coding
ENSG00000166482	-3.00438	4.49114	41.5709	4.12161e-05	0.00157317	MFAP4	17	microfibril associated protein 4 [Source:HGNC Symbol;Acc:HGNC:7035]	protein_coding
ENSG00000185633	-4.89377	0.984247	41.5662	4.12373e-05	0.00157317	NDUFA4L2	12	NDUFA4 mitochondrial complex associated like 2 [Source:HGNC Symbol;Acc:HGNC:29836]	protein_coding
ENSG00000140350	-1.08638	6.89109	41.3778	4.20974e-05	0.00159254	ANP32A	15	acidic nuclear phosphoprotein 32 family member A [Source:HGNC Symbol;Acc:HGNC:13233]	protein_coding
ENSG00000188211	-1.79445	4.63669	41.4157	4.19226e-05	0.00159254	NCR3LG1	11	natural killer cell cytotoxicity receptor 3 ligand 1 [Source:HGNC Symbol;Acc:HGNC:42400]	protein_coding
ENSG00000253729	-1.19867	7.57461	41.3777	4.20978e-05	0.00159254	PRKDC	8	protein kinase, DNA-activated, catalytic subunit [Source:HGNC Symbol;Acc:HGNC:9413]	protein_coding
ENSG00000115165	1.26298	4.3018	41.3035	4.24421e-05	0.00160109	CYTIP	2	cytohesin 1 interacting protein [Source:HGNC Symbol;Acc:HGNC:9506]	protein_coding
ENSG00000114529	2.2123	2.13551	41.1776	4.30342e-05	0.00160998	C3orf52	3	chromosome 3 open reading frame 52 [Source:HGNC Symbol;Acc:HGNC:26255]	protein_coding
ENSG00000140525	-1.23897	7.18204	41.2016	4.29208e-05	0.00160998	FANCI	15	FA complementation group I [Source:HGNC Symbol;Acc:HGNC:25568]	protein_coding
ENSG00000237649	-1.58816	6.61785	41.189	4.29804e-05	0.00160998	KIFC1	6	kinesin family member C1 [Source:HGNC Symbol;Acc:HGNC:6389]	protein_coding
ENSG00000130529	1.92232	1.93437	41.1322	4.32503e-05	0.00161361	TRPM4	19	transient receptor potential cation channel subfamily M member 4 [Source:HGNC Symbol;Acc:HGNC:17993]	protein_coding
ENSG00000108468	-1.10043	5.15878	40.9171	4.42903e-05	0.00164787	CBX1	17	chromobox 1 [Source:HGNC Symbol;Acc:HGNC:1551]	protein_coding
ENSG00000148346	2.85792	3.79377	40.739	4.5174e-05	0.00167156	LCN2	9	lipocalin 2 [Source:HGNC Symbol;Acc:HGNC:6526]	protein_coding
ENSG00000167565	1.24021	3.6083	40.7565	4.50862e-05	0.00167156	SERTAD3	19	SERTA domain containing 3 [Source:HGNC Symbol;Acc:HGNC:17931]	protein_coding
ENSG00000139278	1.43735	4.52802	40.6303	4.57234e-05	0.00168728	GLIPR1	12	GLI pathogenesis related 1 [Source:HGNC Symbol;Acc:HGNC:17001]	protein_coding
ENSG00000100714	-1.47671	7.7655	40.5081	4.63511e-05	0.00168973	MTHFD1	14	methylenetetrahydrofolate dehydrogenase, cyclohydrolase and formyltetrahydrofolate synthetase 1 [Source:HGNC Symbol;Acc:HGNC:7432]	protein_coding
ENSG00000102245	3.77849	2.58426	40.5088	4.63475e-05	0.00168973	CD40LG	X	CD40 ligand [Source:HGNC Symbol;Acc:HGNC:11935]	protein_coding
ENSG00000106211	1.44612	6.47259	40.496	4.64137e-05	0.00168973	HSPB1	7	heat shock protein family B (small) member 1 [Source:HGNC Symbol;Acc:HGNC:5246]	protein_coding
ENSG00000123240	1.40523	5.41037	40.5146	4.6317e-05	0.00168973	OPTN	10	optineurin [Source:HGNC Symbol;Acc:HGNC:17142]	protein_coding
ENSG00000250722	-2.0708	2.59471	40.5387	4.6193e-05	0.00168973	SELENOP	5	selenoprotein P [Source:HGNC Symbol;Acc:HGNC:10751]	protein_coding
ENSG00000136404	2.66678	5.93371	40.3712	4.70655e-05	0.00170887	TM6SF1	15	transmembrane 6 superfamily member 1 [Source:HGNC Symbol;Acc:HGNC:11860]	protein_coding
ENSG00000153107	-1.38631	5.60865	40.2625	4.76425e-05	0.00172519	ANAPC1	2	anaphase promoting complex subunit 1 [Source:HGNC Symbol;Acc:HGNC:19988]	protein_coding
ENSG00000102393	1.41422	7.06108	39.9624	4.92786e-05	0.00177614	GLA	X	galactosidase alpha [Source:HGNC Symbol;Acc:HGNC:4296]	protein_coding
ENSG00000150867	1.34123	7.23334	39.9329	4.94428e-05	0.00177614	PIP4K2A	10	phosphatidylinositol-5-phosphate 4-kinase type 2 alpha [Source:HGNC Symbol;Acc:HGNC:8997]	protein_coding
ENSG00000167721	-1.0919	6.47277	39.9457	4.93715e-05	0.00177614	TSR1	17	TSR1 ribosome maturation factor [Source:HGNC Symbol;Acc:HGNC:25542]	protein_coding
ENSG00000179222	-1.44103	7.70325	39.9019	4.96161e-05	0.00177765	MAGED1	X	MAGE family member D1 [Source:HGNC Symbol;Acc:HGNC:6813]	protein_coding
ENSG00000094916	-1.12838	7.82212	39.7711	5.0356e-05	0.00179466	CBX5	12	chromobox 5 [Source:HGNC Symbol;Acc:HGNC:1555]	protein_coding
ENSG00000136997	-1.60029	8.33778	39.7934	5.02284e-05	0.00179466	MYC	8	MYC proto-oncogene, bHLH transcription factor [Source:HGNC Symbol;Acc:HGNC:7553]	protein_coding
ENSG00000133101	2.09406	6.39321	39.7296	5.0593e-05	0.00179837	CCNA1	13	cyclin A1 [Source:HGNC Symbol;Acc:HGNC:1577]	protein_coding
ENSG00000087589	1.96691	4.46829	39.655	5.1023e-05	0.00180867	CASS4	20	Cas scaffold protein family member 4 [Source:HGNC Symbol;Acc:HGNC:15878]	protein_coding
ENSG00000158517	3.40314	4.07318	39.6332	5.11498e-05	0.00180867	NCF1	7	neutrophil cytosolic factor 1 [Source:HGNC Symbol;Acc:HGNC:7660]	protein_coding
ENSG00000166510	2.94528	2.34848	39.5424	5.16804e-05	0.00182268	CCDC68	18	coiled-coil domain containing 68 [Source:HGNC Symbol;Acc:HGNC:24350]	protein_coding
ENSG00000101546	-1.36226	4.24157	39.3657	5.27321e-05	0.00185403	RBFA	18	ribosome binding factor A [Source:HGNC Symbol;Acc:HGNC:26120]	protein_coding
ENSG00000129757	2.48119	2.68509	39.3473	5.28431e-05	0.00185403	CDKN1C	11	cyclin dependent kinase inhibitor 1C [Source:HGNC Symbol;Acc:HGNC:1786]	protein_coding
ENSG00000106344	-0.809425	5.94901	39.2948	5.31611e-05	0.00186036	RBM28	7	RNA binding motif protein 28 [Source:HGNC Symbol;Acc:HGNC:21863]	protein_coding
ENSG00000250641	3.16545	1.88324	39.226	5.35814e-05	0.00187024	LY6G6F-LY6G6D	6	LY6G6F-LY6G6D readthrough [Source:HGNC Symbol;Acc:HGNC:38821]	protein_coding
ENSG00000111554	1.31726	5.93762	39.0334	5.47786e-05	0.00190711	MDM1	12	Mdm1 nuclear protein [Source:HGNC Symbol;Acc:HGNC:29917]	protein_coding
ENSG00000058804	-1.15457	6.59629	39.0099	5.49269e-05	0.00190737	NDC1	1	NDC1 transmembrane nucleoporin [Source:HGNC Symbol;Acc:HGNC:25525]	protein_coding
ENSG00000120915	1.72911	2.40148	38.9702	5.51783e-05	0.0019112	EPHX2	8	epoxide hydrolase 2 [Source:HGNC Symbol;Acc:HGNC:3402]	protein_coding
ENSG00000126860	1.77192	3.93894	38.9254	5.54637e-05	0.00191619	EVI2A	17	ecotropic viral integration site 2A [Source:HGNC Symbol;Acc:HGNC:3499]	protein_coding
ENSG00000112033	1.66284	3.86207	38.8833	5.57338e-05	0.00192062	PPARD	6	peroxisome proliferator activated receptor delta [Source:HGNC Symbol;Acc:HGNC:9235]	protein_coding
ENSG00000135838	1.95232	5.55253	38.7913	5.63283e-05	0.00193328	NPL	1	N-acetylneuraminate pyruvate lyase [Source:HGNC Symbol;Acc:HGNC:16781]	protein_coding
ENSG00000278619	-1.51474	3.96052	38.7824	5.63869e-05	0.00193328	MRM1	17	mitochondrial rRNA methyltransferase 1 [Source:HGNC Symbol;Acc:HGNC:26202]	protein_coding
ENSG00000141569	-1.55318	5.43492	38.6689	5.71318e-05	0.00194406	TRIM65	17	tripartite motif containing 65 [Source:HGNC Symbol;Acc:HGNC:27316]	protein_coding
ENSG00000148834	1.14017	8.45216	38.67	5.71248e-05	0.00194406	GSTO1	10	glutathione S-transferase omega 1 [Source:HGNC Symbol;Acc:HGNC:13312]	protein_coding
ENSG00000150630	2.99657	2.45676	38.6718	5.71126e-05	0.00194406	VEGFC	4	vascular endothelial growth factor C [Source:HGNC Symbol;Acc:HGNC:12682]	protein_coding
ENSG00000197019	1.78324	3.70352	38.6443	5.72953e-05	0.00194474	SERTAD1	19	SERTA domain containing 1 [Source:HGNC Symbol;Acc:HGNC:17932]	protein_coding
ENSG00000164463	1.11063	5.23959	38.5036	5.82384e-05	0.00197181	CREBRF	5	CREB3 regulatory factor [Source:HGNC Symbol;Acc:HGNC:24050]	protein_coding
ENSG00000164649	-0.874002	6.36309	38.3701	5.91502e-05	0.00199768	CDCA7L	7	cell division cycle associated 7 like [Source:HGNC Symbol;Acc:HGNC:30777]	protein_coding
ENSG00000133800	6.40668	-0.555826	47.471	5.94164e-05	0.00200168	LYVE1	11	lymphatic vessel endothelial hyaluronan receptor 1 [Source:HGNC Symbol;Acc:HGNC:14687]	protein_coding
ENSG00000116830	-0.916205	6.23703	38.2954	5.96677e-05	0.0020035	TTF2	1	transcription termination factor 2 [Source:HGNC Symbol;Acc:HGNC:12398]	protein_coding
ENSG00000180198	-1.38416	6.41113	38.2813	5.97663e-05	0.0020035	RCC1	1	regulator of chromosome condensation 1 [Source:HGNC Symbol;Acc:HGNC:1913]	protein_coding
ENSG00000139197	-1.2462	4.69096	38.1931	6.03857e-05	0.0020149	PEX5	12	peroxisomal biogenesis factor 5 [Source:HGNC Symbol;Acc:HGNC:9719]	protein_coding
ENSG00000261371	1.52458	8.6293	38.1905	6.04038e-05	0.0020149	PECAM1	17	platelet and endothelial cell adhesion molecule 1 [Source:HGNC Symbol;Acc:HGNC:8823]	protein_coding
ENSG00000140941	1.0553	7.56547	38.1522	6.06755e-05	0.00201701	MAP1LC3B	16	microtubule associated protein 1 light chain 3 beta [Source:HGNC Symbol;Acc:HGNC:13352]	protein_coding
ENSG00000162894	3.03921	0.629635	38.1396	6.07649e-05	0.00201701	FCMR	1	Fc fragment of IgM receptor [Source:HGNC Symbol;Acc:HGNC:14315]	protein_coding
ENSG00000171051	2.80338	3.38552	38.1027	6.10278e-05	0.00202078	FPR1	19	formyl peptide receptor 1 [Source:HGNC Symbol;Acc:HGNC:3826]	protein_coding
ENSG00000002933	2.94915	1.96627	38.0605	6.13309e-05	0.00202586	TMEM176A	7	transmembrane protein 176A [Source:HGNC Symbol;Acc:HGNC:24930]	protein_coding
ENSG00000104870	1.89229	6.01698	38.0122	6.16796e-05	0.00202953	FCGRT	19	Fc fragment of IgG receptor and transporter [Source:HGNC Symbol;Acc:HGNC:3621]	protein_coding
ENSG00000116151	-1.4786	2.81511	38.0036	6.17416e-05	0.00202953	MORN1	1	MORN repeat containing 1 [Source:HGNC Symbol;Acc:HGNC:25852]	protein_coding
ENSG00000170892	1.03953	5.59316	37.9222	6.23355e-05	0.00204409	TSEN34	19	tRNA splicing endonuclease subunit 34 [Source:HGNC Symbol;Acc:HGNC:15506]	protein_coding
ENSG00000105499	4.73355	3.23761	37.8994	6.25024e-05	0.00204461	PLA2G4C	19	phospholipase A2 group IVC [Source:HGNC Symbol;Acc:HGNC:9037]	protein_coding
ENSG00000013573	-1.70949	5.7842	37.7563	6.35655e-05	0.00205458	DDX11	12	DEAD/H-box helicase 11 [Source:HGNC Symbol;Acc:HGNC:2736]	protein_coding
ENSG00000108448	1.70365	2.78822	37.797	6.32613e-05	0.00205458	TRIM16L	17	tripartite motif containing 16 like [Source:HGNC Symbol;Acc:HGNC:32670]	protein_coding
ENSG00000152932	2.30937	2.31917	37.7587	6.3548e-05	0.00205458	RAB3C	5	RAB3C, member RAS oncogene family [Source:HGNC Symbol;Acc:HGNC:30269]	protein_coding
ENSG00000178573	2.38165	1.92288	37.7613	6.35284e-05	0.00205458	MAF	16	MAF bZIP transcription factor [Source:HGNC Symbol;Acc:HGNC:6776]	protein_coding
ENSG00000185869	-1.15825	3.5855	37.8121	6.31485e-05	0.00205458	ZNF829	19	zinc finger protein 829 [Source:HGNC Symbol;Acc:HGNC:34032]	protein_coding
ENSG00000119866	-0.989177	6.01275	37.7167	6.38637e-05	0.0020593	BCL11A	2	BAF chromatin remodeling complex subunit BCL11A [Source:HGNC Symbol;Acc:HGNC:13221]	protein_coding
ENSG00000081138	-5.80111	1.09764	37.5391	6.52207e-05	0.00208814	CDH7	18	cadherin 7 [Source:HGNC Symbol;Acc:HGNC:1766]	protein_coding
ENSG00000090674	1.57075	4.69979	37.5549	6.50982e-05	0.00208814	MCOLN1	19	mucolipin 1 [Source:HGNC Symbol;Acc:HGNC:13356]	protein_coding
ENSG00000162437	-1.19643	4.96934	37.5454	6.51722e-05	0.00208814	RAVER2	1	ribonucleoprotein, PTB binding 2 [Source:HGNC Symbol;Acc:HGNC:25577]	protein_coding
ENSG00000067836	1.15733	4.58986	37.4392	6.59988e-05	0.00210807	ROGDI	16	rogdi atypical leucine zipper [Source:HGNC Symbol;Acc:HGNC:29478]	protein_coding
ENSG00000125485	-1.432	3.98152	37.3476	6.67214e-05	0.00212281	DDX31	9	DEAD-box helicase 31 [Source:HGNC Symbol;Acc:HGNC:16715]	protein_coding
ENSG00000172878	-1.53663	4.08289	37.3282	6.68761e-05	0.00212281	METAP1D	2	methionyl aminopeptidase type 1D, mitochondrial [Source:HGNC Symbol;Acc:HGNC:32583]	protein_coding
ENSG00000181804	1.65643	4.80292	37.3214	6.69305e-05	0.00212281	SLC9A9	3	solute carrier family 9 member A9 [Source:HGNC Symbol;Acc:HGNC:20653]	protein_coding
ENSG00000127252	2.29339	0.31079	37.2851	6.72202e-05	0.00212702	PLAAT1	3	phospholipase A and acyltransferase 1 [Source:HGNC Symbol;Acc:HGNC:14922]	protein_coding
ENSG00000103175	2.9071	3.69116	37.1617	6.8218e-05	0.00215356	WFDC1	16	WAP four-disulfide core domain 1 [Source:HGNC Symbol;Acc:HGNC:15466]	protein_coding
ENSG00000115232	-1.02702	8.53953	37.0811	6.88788e-05	0.00216603	ITGA4	2	integrin subunit alpha 4 [Source:HGNC Symbol;Acc:HGNC:6140]	protein_coding
ENSG00000166508	-1.1322	8.76417	37.0746	6.89328e-05	0.00216603	MCM7	7	minichromosome maintenance complex component 7 [Source:HGNC Symbol;Acc:HGNC:6950]	protein_coding
ENSG00000204592	2.05937	9.00673	37.0336	6.9272e-05	0.00217165	HLA-E	6	major histocompatibility complex, class I, E [Source:HGNC Symbol;Acc:HGNC:4962]	protein_coding
ENSG00000133315	-1.64281	4.52579	36.9954	6.95898e-05	0.00217657	MACROD1	11	mono-ADP ribosylhydrolase 1 [Source:HGNC Symbol;Acc:HGNC:29598]	protein_coding
ENSG00000007129	2.72113	2.52313	36.9022	7.0373e-05	0.00219016	CEACAM21	19	CEA cell adhesion molecule 21 [Source:HGNC Symbol;Acc:HGNC:28834]	protein_coding
ENSG00000131781	1.32362	4.05451	36.8891	7.04844e-05	0.00219016	FMO5	1	flavin containing dimethylaniline monoxygenase 5 [Source:HGNC Symbol;Acc:HGNC:3773]	protein_coding
ENSG00000168672	-2.02598	2.79965	36.8861	7.05096e-05	0.00219016	LRATD2	8	LRAT domain containing 2 [Source:HGNC Symbol;Acc:HGNC:24166]	protein_coding
ENSG00000128050	-1.30866	8.38541	36.8347	7.09469e-05	0.0021987	PAICS	4	phosphoribosylaminoimidazole carboxylase and phosphoribosylaminoimidazolesuccinocarboxamide synthase [Source:HGNC Symbol;Acc:HGNC:8587]	protein_coding
ENSG00000166333	1.75071	4.30504	36.7568	7.16161e-05	0.00221438	ILK	11	integrin linked kinase [Source:HGNC Symbol;Acc:HGNC:6040]	protein_coding
ENSG00000101464	-0.895725	5.63598	36.7003	7.21055e-05	0.00222443	PIGU	20	phosphatidylinositol glycan anchor biosynthesis class U [Source:HGNC Symbol;Acc:HGNC:15791]	protein_coding
ENSG00000119900	1.62202	6.17527	36.667	7.2396e-05	0.00222832	OGFRL1	6	opioid growth factor receptor like 1 [Source:HGNC Symbol;Acc:HGNC:21378]	protein_coding
ENSG00000145936	2.34798	1.99032	36.5964	7.30168e-05	0.00224233	KCNMB1	5	potassium calcium-activated channel subfamily M regulatory beta subunit 1 [Source:HGNC Symbol;Acc:HGNC:6285]	protein_coding
ENSG00000087076	1.61601	2.55679	36.5644	7.32997e-05	0.00224592	HSD17B14	19	hydroxysteroid 17-beta dehydrogenase 14 [Source:HGNC Symbol;Acc:HGNC:23238]	protein_coding
ENSG00000116977	0.96472	7.36874	36.5372	7.35415e-05	0.00224825	LGALS8	1	galectin 8 [Source:HGNC Symbol;Acc:HGNC:6569]	protein_coding
ENSG00000113070	2.53409	2.2274	36.5172	7.37202e-05	0.00224863	HBEGF	5	heparin binding EGF like growth factor [Source:HGNC Symbol;Acc:HGNC:3059]	protein_coding
ENSG00000023902	1.61173	5.52159	36.3842	7.49193e-05	0.00226186	PLEKHO1	1	pleckstrin homology domain containing O1 [Source:HGNC Symbol;Acc:HGNC:24310]	protein_coding
ENSG00000103202	-0.910338	7.09439	36.4021	7.47567e-05	0.00226186	NME4	16	NME/NM23 nucleoside diphosphate kinase 4 [Source:HGNC Symbol;Acc:HGNC:7852]	protein_coding
ENSG00000143545	1.01206	3.72103	36.3766	7.49891e-05	0.00226186	RAB13	1	RAB13, member RAS oncogene family [Source:HGNC Symbol;Acc:HGNC:9762]	protein_coding
ENSG00000172986	-3.10756	2.32804	36.4168	7.46238e-05	0.00226186	GXYLT2	3	glucoside xylosyltransferase 2 [Source:HGNC Symbol;Acc:HGNC:33383]	protein_coding
ENSG00000198626	3.43509	2.2329	36.4187	7.46068e-05	0.00226186	RYR2	1	ryanodine receptor 2 [Source:HGNC Symbol;Acc:HGNC:10484]	protein_coding
ENSG00000111696	-1.45895	3.33894	36.2885	7.57968e-05	0.00228115	NT5DC3	12	5'-nucleotidase domain containing 3 [Source:HGNC Symbol;Acc:HGNC:30826]	protein_coding
ENSG00000160117	-1.84095	5.19349	36.2302	7.63372e-05	0.00229232	ANKLE1	19	ankyrin repeat and LEM domain containing 1 [Source:HGNC Symbol;Acc:HGNC:26812]	protein_coding
ENSG00000114013	3.12402	2.56513	36.2085	7.65399e-05	0.00229332	CD86	3	CD86 molecule [Source:HGNC Symbol;Acc:HGNC:1705]	protein_coding
ENSG00000168461	1.49216	7.15724	36.1888	7.67239e-05	0.00229376	RAB31	18	RAB31, member RAS oncogene family [Source:HGNC Symbol;Acc:HGNC:9771]	protein_coding
ENSG00000198452	2.18323	3.22018	35.9738	7.87687e-05	0.0023497	OR14L1P	1	olfactory receptor family 14 subfamily L member 1 pseudogene [Source:HGNC Symbol;Acc:HGNC:15023]	protein_coding
ENSG00000107815	-1.12396	4.41534	35.9054	7.94323e-05	0.00236344	TWNK	10	twinkle mtDNA helicase [Source:HGNC Symbol;Acc:HGNC:1160]	protein_coding
ENSG00000127564	-1.82029	5.38665	35.8905	7.95782e-05	0.00236344	PKMYT1	16	protein kinase, membrane associated tyrosine/threonine 1 [Source:HGNC Symbol;Acc:HGNC:29650]	protein_coding
ENSG00000147872	3.00167	10.1664	35.8505	7.99701e-05	0.00236988	PLIN2	9	perilipin 2 [Source:HGNC Symbol;Acc:HGNC:248]	protein_coding
ENSG00000135632	-1.31445	4.55521	35.8071	8.03989e-05	0.00237738	SMYD5	2	SMYD family member 5 [Source:HGNC Symbol;Acc:HGNC:16258]	protein_coding
ENSG00000085741	3.33242	2.22587	35.7485	8.09806e-05	0.00238937	WNT11	11	Wnt family member 11 [Source:HGNC Symbol;Acc:HGNC:12776]	protein_coding
ENSG00000164163	-1.01523	7.34743	35.7127	8.13384e-05	0.00239471	ABCE1	4	ATP binding cassette subfamily E member 1 [Source:HGNC Symbol;Acc:HGNC:69]	protein_coding
ENSG00000137473	4.98284	1.69291	35.4014	8.45333e-05	0.00248337	TTC29	4	tetratricopeptide repeat domain 29 [Source:HGNC Symbol;Acc:HGNC:29936]	protein_coding
ENSG00000274750	2.26364	1.95409	35.3247	8.53426e-05	0.00250172	H3C6	6	H3 clustered histone 6 [Source:HGNC Symbol;Acc:HGNC:4769]	protein_coding
ENSG00000131711	4.2732	2.43047	35.2994	8.5612e-05	0.0025042	MAP1B	5	microtubule associated protein 1B [Source:HGNC Symbol;Acc:HGNC:6836]	protein_coding
ENSG00000049540	-3.51573	1.06348	35.1045	8.77185e-05	0.00253786	ELN	7	elastin [Source:HGNC Symbol;Acc:HGNC:3327]	protein_coding
ENSG00000113361	3.34627	1.9124	35.1345	8.73903e-05	0.00253786	CDH6	5	cadherin 6 [Source:HGNC Symbol;Acc:HGNC:1765]	protein_coding
ENSG00000115325	0.879741	6.08565	35.149	8.72321e-05	0.00253786	DOK1	2	docking protein 1 [Source:HGNC Symbol;Acc:HGNC:2990]	protein_coding
ENSG00000135045	-1.01341	4.67371	35.0891	8.78873e-05	0.00253786	C9orf40	9	chromosome 9 open reading frame 40 [Source:HGNC Symbol;Acc:HGNC:23433]	protein_coding
ENSG00000149823	-1.19768	5.69171	35.1339	8.7396e-05	0.00253786	VPS51	11	VPS51 subunit of GARP complex [Source:HGNC Symbol;Acc:HGNC:1172]	protein_coding
ENSG00000227191	2.07883	4.73676	35.0903	8.78741e-05	0.00253786	TRGC2	7	T cell receptor gamma constant 2 [Source:HGNC Symbol;Acc:HGNC:12276]	TR_C_gene
ENSG00000114541	1.99708	6.22764	35.0319	8.85179e-05	0.00255063	FRMD4B	3	FERM domain containing 4B [Source:HGNC Symbol;Acc:HGNC:24886]	protein_coding
ENSG00000073111	-1.41306	7.36541	34.9981	8.88934e-05	0.00255602	MCM2	3	minichromosome maintenance complex component 2 [Source:HGNC Symbol;Acc:HGNC:6944]	protein_coding
ENSG00000101444	-0.912536	7.0012	34.9719	8.91862e-05	0.002559	AHCY	20	adenosylhomocysteinase [Source:HGNC Symbol;Acc:HGNC:343]	protein_coding
ENSG00000143995	1.0845	5.99366	34.892	9.00849e-05	0.00257932	MEIS1	2	Meis homeobox 1 [Source:HGNC Symbol;Acc:HGNC:7000]	protein_coding
ENSG00000077585	1.37591	3.51084	34.8719	9.03117e-05	0.00258036	GPR137B	1	G protein-coupled receptor 137B [Source:HGNC Symbol;Acc:HGNC:11862]	protein_coding
ENSG00000103811	2.23222	2.97902	34.7994	9.11392e-05	0.00259306	CTSH	15	cathepsin H [Source:HGNC Symbol;Acc:HGNC:2535]	protein_coding
ENSG00000180871	1.94123	4.50485	34.816	9.09486e-05	0.00259306	CXCR2	2	C-X-C motif chemokine receptor 2 [Source:HGNC Symbol;Acc:HGNC:6027]	protein_coding
ENSG00000070540	1.9922	5.71209	34.7541	9.16601e-05	0.00260242	WIPI1	17	WD repeat domain, phosphoinositide interacting 1 [Source:HGNC Symbol;Acc:HGNC:25471]	protein_coding
ENSG00000179165	4.75053	0.289086	34.6816	9.25023e-05	0.00262083	PXT1	6	peroxisomal testis enriched protein 1 [Source:HGNC Symbol;Acc:HGNC:18312]	protein_coding
ENSG00000148180	1.54675	8.03001	34.6633	9.27154e-05	0.00262139	GSN	9	gelsolin [Source:HGNC Symbol;Acc:HGNC:4620]	protein_coding
ENSG00000130958	1.51199	3.65305	34.5974	9.34911e-05	0.00263781	SLC35D2	9	solute carrier family 35 member D2 [Source:HGNC Symbol;Acc:HGNC:20799]	protein_coding
ENSG00000111897	0.781115	7.28199	34.5456	9.41057e-05	0.00264963	SERINC1	6	serine incorporator 1 [Source:HGNC Symbol;Acc:HGNC:13464]	protein_coding
ENSG00000116062	-1.31054	7.31956	34.5188	9.44247e-05	0.0026531	MSH6	2	mutS homolog 6 [Source:HGNC Symbol;Acc:HGNC:7329]	protein_coding
ENSG00000128000	-1.92447	3.34601	34.396	9.59074e-05	0.00268362	ZNF780B	19	zinc finger protein 780B [Source:HGNC Symbol;Acc:HGNC:33109]	protein_coding
ENSG00000204323	1.61166	2.04413	34.4082	9.57589e-05	0.00268362	SMIM5	17	small integral membrane protein 5 [Source:HGNC Symbol;Acc:HGNC:40030]	protein_coding
ENSG00000140416	2.21763	7.07964	34.3085	9.69797e-05	0.00270246	TPM1	15	tropomyosin 1 [Source:HGNC Symbol;Acc:HGNC:12010]	protein_coding
ENSG00000158406	3.10484	2.35214	34.3209	9.6827e-05	0.00270246	H4C8	6	H4 clustered histone 8 [Source:HGNC Symbol;Acc:HGNC:4788]	protein_coding
ENSG00000084734	4.73316	2.27941	34.29	9.72074e-05	0.00270324	GCKR	2	glucokinase regulator [Source:HGNC Symbol;Acc:HGNC:4196]	protein_coding
ENSG00000126458	2.33274	3.92972	34.2344	9.78988e-05	0.00271689	RRAS	19	RAS related [Source:HGNC Symbol;Acc:HGNC:10447]	protein_coding
ENSG00000049323	2.13846	8.11476	34.1379	9.91113e-05	0.00272909	LTBP1	2	latent transforming growth factor beta binding protein 1 [Source:HGNC Symbol;Acc:HGNC:6714]	protein_coding
ENSG00000104951	4.51931	1.55517	34.137	9.91227e-05	0.00272909	IL4I1	19	interleukin 4 induced 1 [Source:HGNC Symbol;Acc:HGNC:19094]	protein_coding
ENSG00000134668	5.57891	-0.439565	34.1353	9.91443e-05	0.00272909	SPOCD1	1	SPOC domain containing 1 [Source:HGNC Symbol;Acc:HGNC:26338]	protein_coding
ENSG00000160193	-1.13229	4.25167	34.1572	9.8868e-05	0.00272909	WDR4	21	WD repeat domain 4 [Source:HGNC Symbol;Acc:HGNC:12756]	protein_coding
ENSG00000148600	3.2548	4.71677	34.0899	9.97208e-05	0.00273939	CDHR1	10	cadherin related family member 1 [Source:HGNC Symbol;Acc:HGNC:14550]	protein_coding
ENSG00000101608	2.27831	9.46165	34.0493	0.000100241	0.0027481	MYL12A	18	myosin light chain 12A [Source:HGNC Symbol;Acc:HGNC:16701]	protein_coding
ENSG00000100285	-1.56217	3.69175	34.0097	0.00010075	0.00275092	NEFH	22	neurofilament heavy [Source:HGNC Symbol;Acc:HGNC:7737]	protein_coding
ENSG00000117155	1.36429	6.31381	34.0111	0.000100732	0.00275092	SSX2IP	1	SSX family member 2 interacting protein [Source:HGNC Symbol;Acc:HGNC:16509]	protein_coding
ENSG00000133606	0.788185	7.61874	33.9158	0.00010197	0.00277306	MKRN1	7	makorin ring finger protein 1 [Source:HGNC Symbol;Acc:HGNC:7112]	protein_coding
ENSG00000204410	-1.72928	2.9336	33.9188	0.000101931	0.00277306	MSH5	6	mutS homolog 5 [Source:HGNC Symbol;Acc:HGNC:7328]	protein_coding
ENSG00000059573	-1.0305	7.63757	33.8383	0.000102991	0.00279207	ALDH18A1	10	aldehyde dehydrogenase 18 family member A1 [Source:HGNC Symbol;Acc:HGNC:9722]	protein_coding
ENSG00000151320	-4.63767	0.176012	33.8159	0.000103288	0.00279207	AKAP6	14	A-kinase anchoring protein 6 [Source:HGNC Symbol;Acc:HGNC:376]	protein_coding
ENSG00000171611	5.22743	1.91277	33.8258	0.000103157	0.00279207	PTCRA	6	pre T cell antigen receptor alpha [Source:HGNC Symbol;Acc:HGNC:21290]	protein_coding
ENSG00000110628	1.33064	4.11301	33.7826	0.000103731	0.00279847	SLC22A18	11	solute carrier family 22 member 18 [Source:HGNC Symbol;Acc:HGNC:10964]	protein_coding
ENSG00000125266	2.52832	0.64396	33.7336	0.000104389	0.00280563	EFNB2	13	ephrin B2 [Source:HGNC Symbol;Acc:HGNC:3227]	protein_coding
ENSG00000198838	-1.38561	4.00159	33.7319	0.000104411	0.00280563	RYR3	15	ryanodine receptor 3 [Source:HGNC Symbol;Acc:HGNC:10485]	protein_coding
ENSG00000071575	-2.38089	2.89327	33.7005	0.000104835	0.00280671	TRIB2	2	tribbles pseudokinase 2 [Source:HGNC Symbol;Acc:HGNC:30809]	protein_coding
ENSG00000160957	-1.93582	5.59685	33.6982	0.000104866	0.00280671	RECQL4	8	RecQ like helicase 4 [Source:HGNC Symbol;Acc:HGNC:9949]	protein_coding
ENSG00000146670	-0.875664	6.34405	33.6166	0.000105977	0.00282176	CDCA5	11	cell division cycle associated 5 [Source:HGNC Symbol;Acc:HGNC:14626]	protein_coding
ENSG00000152689	1.28406	6.28019	33.611	0.000106053	0.00282176	RASGRP3	2	RAS guanyl releasing protein 3 [Source:HGNC Symbol;Acc:HGNC:14545]	protein_coding
ENSG00000213160	-1.41695	5.09593	33.6115	0.000106047	0.00282176	KLHL23	2	kelch like family member 23 [Source:HGNC Symbol;Acc:HGNC:27506]	protein_coding
ENSG00000197903	1.89414	5.12205	33.5223	0.000107278	0.00284876	H2BC12	6	H2B clustered histone 12 [Source:HGNC Symbol;Acc:HGNC:13954]	protein_coding
ENSG00000102316	1.17394	7.69318	33.4228	0.000108671	0.00287541	MAGED2	X	MAGE family member D2 [Source:HGNC Symbol;Acc:HGNC:16353]	protein_coding
ENSG00000155307	2.11093	7.6342	33.4203	0.000108706	0.00287541	SAMSN1	21	SAM domain, SH3 domain and nuclear localization signals 1 [Source:HGNC Symbol;Acc:HGNC:10528]	protein_coding
ENSG00000064652	1.61696	2.23631	33.379	0.000109291	0.00288523	SNX24	5	sorting nexin 24 [Source:HGNC Symbol;Acc:HGNC:21533]	protein_coding
ENSG00000185614	1.57958	6.20698	33.354	0.000109647	0.002889	INKA1	3	inka box actin regulator 1 [Source:HGNC Symbol;Acc:HGNC:32480]	protein_coding
ENSG00000108387	2.68995	2.29511	33.2345	0.000111366	0.00291726	SEPTIN4	17	septin 4 [Source:HGNC Symbol;Acc:HGNC:9165]	protein_coding
ENSG00000158796	1.24534	5.58242	33.2392	0.000111297	0.00291726	DEDD	1	death effector domain containing [Source:HGNC Symbol;Acc:HGNC:2755]	protein_coding
ENSG00000169313	3.03918	0.577841	33.2536	0.000111089	0.00291726	P2RY12	3	purinergic receptor P2Y12 [Source:HGNC Symbol;Acc:HGNC:18124]	protein_coding
ENSG00000145022	0.917549	5.66158	33.2117	0.000111697	0.00292029	TCTA	3	T cell leukemia translocation altered [Source:HGNC Symbol;Acc:HGNC:11692]	protein_coding
ENSG00000145246	1.10964	6.32867	33.1577	0.000112487	0.00292964	ATP10D	4	ATPase phospholipid transporting 10D (putative) [Source:HGNC Symbol;Acc:HGNC:13549]	protein_coding
ENSG00000166501	0.872121	7.93218	33.1697	0.000112311	0.00292964	PRKCB	16	protein kinase C beta [Source:HGNC Symbol;Acc:HGNC:9395]	protein_coding
ENSG00000144824	-1.92419	2.40484	32.9984	0.000114857	0.00298561	PHLDB2	3	pleckstrin homology like domain family B member 2 [Source:HGNC Symbol;Acc:HGNC:29573]	protein_coding
ENSG00000100600	3.51107	5.64498	32.9089	0.000116214	0.0030151	LGMN	14	legumain [Source:HGNC Symbol;Acc:HGNC:9472]	protein_coding
ENSG00000257017	2.82281	3.1565	32.8707	0.000116799	0.00301871	HP	16	haptoglobin [Source:HGNC Symbol;Acc:HGNC:5141]	protein_coding
ENSG00000276043	-2.03554	6.38313	32.8721	0.000116778	0.00301871	UHRF1	19	ubiquitin like with PHD and ring finger domains 1 [Source:HGNC Symbol;Acc:HGNC:12556]	protein_coding
ENSG00000110031	1.61742	6.58551	32.7911	0.00011803	0.0030387	LPXN	11	leupaxin [Source:HGNC Symbol;Acc:HGNC:14061]	protein_coding
ENSG00000137331	1.90142	2.18067	32.7855	0.000118116	0.0030387	IER3	6	immediate early response 3 [Source:HGNC Symbol;Acc:HGNC:5392]	protein_coding
ENSG00000139679	1.84986	3.83158	32.7772	0.000118245	0.0030387	LPAR6	13	lysophosphatidic acid receptor 6 [Source:HGNC Symbol;Acc:HGNC:15520]	protein_coding
ENSG00000100351	2.03859	5.87234	32.7459	0.000118734	0.00304024	GRAP2	22	GRB2 related adaptor protein 2 [Source:HGNC Symbol;Acc:HGNC:4563]	protein_coding
ENSG00000109272	5.1237	2.1879	32.7446	0.000118754	0.00304024	PF4V1	4	platelet factor 4 variant 1 [Source:HGNC Symbol;Acc:HGNC:8862]	protein_coding
ENSG00000142961	1.84027	4.91931	32.644	0.000120343	0.00306931	MOB3C	1	MOB kinase activator 3C [Source:HGNC Symbol;Acc:HGNC:29800]	protein_coding
ENSG00000159450	3.2984	0.784957	32.6471	0.000120294	0.00306931	TCHH	1	trichohyalin [Source:HGNC Symbol;Acc:HGNC:11791]	protein_coding
ENSG00000099282	2.55018	4.41792	32.5977	0.000121082	0.00308235	TSPAN15	10	tetraspanin 15 [Source:HGNC Symbol;Acc:HGNC:23298]	protein_coding
ENSG00000106785	-1.33608	6.27361	32.5678	0.000121562	0.00308876	TRIM14	9	tripartite motif containing 14 [Source:HGNC Symbol;Acc:HGNC:16283]	protein_coding
ENSG00000160714	0.793557	5.39895	32.3679	0.00012483	0.00316588	UBE2Q1	1	ubiquitin conjugating enzyme E2 Q1 [Source:HGNC Symbol;Acc:HGNC:15698]	protein_coding
ENSG00000010404	1.28094	4.31865	32.2848	0.00012622	0.00317141	IDS	X	iduronate 2-sulfatase [Source:HGNC Symbol;Acc:HGNC:5389]	protein_coding
ENSG00000130222	2.63744	1.49256	32.3028	0.000125918	0.00317141	GADD45G	9	growth arrest and DNA damage inducible gamma [Source:HGNC Symbol;Acc:HGNC:4097]	protein_coding
ENSG00000132780	-1.02243	7.88911	32.2852	0.000126213	0.00317141	NASP	1	nuclear autoantigenic sperm protein [Source:HGNC Symbol;Acc:HGNC:7644]	protein_coding
ENSG00000164087	-1.05594	5.34525	32.3158	0.000125699	0.00317141	POC1A	3	POC1 centriolar protein A [Source:HGNC Symbol;Acc:HGNC:24488]	protein_coding
ENSG00000188313	1.71522	7.24497	32.2963	0.000126026	0.00317141	PLSCR1	3	phospholipid scramblase 1 [Source:HGNC Symbol;Acc:HGNC:9092]	protein_coding
ENSG00000173898	-2.34369	1.61727	32.143	0.000128632	0.00322291	SPTBN2	11	spectrin beta, non-erythrocytic 2 [Source:HGNC Symbol;Acc:HGNC:11276]	protein_coding
ENSG00000205846	5.77443	-0.707411	32.1365	0.000128745	0.00322291	CLEC6A	12	C-type lectin domain containing 6A [Source:HGNC Symbol;Acc:HGNC:14556]	protein_coding
ENSG00000128245	1.34573	8.2458	32.1164	0.000129091	0.00322561	YWHAH	22	tyrosine 3-monooxygenase/tryptophan 5-monooxygenase activation protein eta [Source:HGNC Symbol;Acc:HGNC:12853]	protein_coding
ENSG00000165169	1.83414	5.52177	32.0757	0.000129796	0.00323726	DYNLT3	X	dynein light chain Tctex-type 3 [Source:HGNC Symbol;Acc:HGNC:11694]	protein_coding
ENSG00000110090	-0.88288	6.07473	31.9993	0.000131134	0.00326461	CPT1A	11	carnitine palmitoyltransferase 1A [Source:HGNC Symbol;Acc:HGNC:2328]	protein_coding
ENSG00000137124	-0.93735	5.90878	31.9779	0.00013151	0.00326796	ALDH1B1	9	aldehyde dehydrogenase 1 family member B1 [Source:HGNC Symbol;Acc:HGNC:407]	protein_coding
ENSG00000107745	1.11331	6.9699	31.9488	0.000132026	0.00326924	MICU1	10	mitochondrial calcium uptake 1 [Source:HGNC Symbol;Acc:HGNC:1530]	protein_coding
ENSG00000187699	1.55949	6.1613	31.9477	0.000132044	0.00326924	C2orf88	2	chromosome 2 open reading frame 88 [Source:HGNC Symbol;Acc:HGNC:28191]	protein_coding
ENSG00000172667	2.04967	5.75734	31.8982	0.000132926	0.00328507	ZMAT3	3	zinc finger matrin-type 3 [Source:HGNC Symbol;Acc:HGNC:29983]	protein_coding
ENSG00000119782	2.53925	3.58106	31.8584	0.000133641	0.00329672	FKBP1B	2	FKBP prolyl isomerase 1B [Source:HGNC Symbol;Acc:HGNC:3712]	protein_coding
ENSG00000177192	-1.08654	4.61893	31.7941	0.000134804	0.00331936	PUS1	12	pseudouridine synthase 1 [Source:HGNC Symbol;Acc:HGNC:15508]	protein_coding
ENSG00000169508	1.62245	5.90748	31.7477	0.00013565	0.00333414	GPR183	13	G protein-coupled receptor 183 [Source:HGNC Symbol;Acc:HGNC:3128]	protein_coding
ENSG00000067177	-1.62838	3.58157	31.6959	0.000136603	0.00334791	PHKA1	X	phosphorylase kinase regulatory subunit alpha 1 [Source:HGNC Symbol;Acc:HGNC:8925]	protein_coding
ENSG00000109099	1.32781	5.63528	31.6428	0.000137588	0.00334791	PMP22	17	peripheral myelin protein 22 [Source:HGNC Symbol;Acc:HGNC:9118]	protein_coding
ENSG00000115226	5.74398	-0.845067	31.6759	0.000136974	0.00334791	FNDC4	2	fibronectin type III domain containing 4 [Source:HGNC Symbol;Acc:HGNC:20239]	protein_coding
ENSG00000128815	-1.07782	4.9796	31.6381	0.000137676	0.00334791	WDFY4	10	WDFY family member 4 [Source:HGNC Symbol;Acc:HGNC:29323]	protein_coding
ENSG00000129636	1.20661	7.00795	31.636	0.000137715	0.00334791	ITFG1	16	integrin alpha FG-GAP repeat containing 1 [Source:HGNC Symbol;Acc:HGNC:30697]	protein_coding
ENSG00000135069	-2.27846	6.65368	31.6102	0.000138198	0.00334791	PSAT1	9	phosphoserine aminotransferase 1 [Source:HGNC Symbol;Acc:HGNC:19129]	protein_coding
ENSG00000136238	0.952414	7.99751	31.5975	0.000138435	0.00334791	RAC1	7	Rac family small GTPase 1 [Source:HGNC Symbol;Acc:HGNC:9801]	protein_coding
ENSG00000137502	2.37606	1.56016	31.6585	0.000137296	0.00334791	RAB30	11	RAB30, member RAS oncogene family [Source:HGNC Symbol;Acc:HGNC:9770]	protein_coding
ENSG00000185222	1.36785	6.67513	31.5993	0.000138402	0.00334791	TCEAL9	X	transcription elongation factor A like 9 [Source:HGNC Symbol;Acc:HGNC:30084]	protein_coding
ENSG00000101057	-1.35394	7.52627	31.5632	0.000139079	0.00335749	MYBL2	20	MYB proto-oncogene like 2 [Source:HGNC Symbol;Acc:HGNC:7548]	protein_coding
ENSG00000212747	2.17508	2.25599	31.5471	0.000139385	0.00335888	RTL8B	X	retrotransposon Gag like 8B [Source:HGNC Symbol;Acc:HGNC:33156]	protein_coding
ENSG00000175854	1.0932	4.74461	31.5178	0.00013994	0.00336627	SWI5	9	SWI5 homologous recombination repair protein [Source:HGNC Symbol;Acc:HGNC:31412]	protein_coding
ENSG00000139826	0.842977	5.26409	31.4385	0.000141455	0.00339067	ABHD13	13	abhydrolase domain containing 13 [Source:HGNC Symbol;Acc:HGNC:20293]	protein_coding
ENSG00000188916	3.26518	1.74565	31.4483	0.000141267	0.00339067	INSYN2A	10	inhibitory synaptic factor 2A [Source:HGNC Symbol;Acc:HGNC:33859]	protein_coding
ENSG00000103356	-1.45651	4.70263	31.4032	0.000142138	0.00340101	EARS2	16	glutamyl-tRNA synthetase 2, mitochondrial [Source:HGNC Symbol;Acc:HGNC:29419]	protein_coding
ENSG00000028839	1.31678	5.25665	31.2492	0.000145154	0.00346096	TBPL1	6	TATA-box binding protein like 1 [Source:HGNC Symbol;Acc:HGNC:11589]	protein_coding
ENSG00000126524	1.66913	6.20467	31.2539	0.000145062	0.00346096	SBDS	7	SBDS ribosome maturation factor [Source:HGNC Symbol;Acc:HGNC:19440]	protein_coding
ENSG00000126500	-3.52317	0.00435513	31.2227	0.000145681	0.00346741	FLRT1	11	fibronectin leucine rich transmembrane protein 1 [Source:HGNC Symbol;Acc:HGNC:3760]	protein_coding
ENSG00000095970	4.49758	1.99402	31.1894	0.000146346	0.00347713	TREM2	6	triggering receptor expressed on myeloid cells 2 [Source:HGNC Symbol;Acc:HGNC:17761]	protein_coding
ENSG00000133872	1.01471	8.83749	31.1341	0.000147458	0.00349742	SARAF	8	store-operated calcium entry associated regulatory factor [Source:HGNC Symbol;Acc:HGNC:28789]	protein_coding
ENSG00000132768	-0.782707	5.26028	31.0636	0.000148892	0.00352526	DPH2	1	diphthamide biosynthesis 2 [Source:HGNC Symbol;Acc:HGNC:3004]	protein_coding
ENSG00000103316	2.50538	2.87061	31.0475	0.000149221	0.00352686	CRYM	16	crystallin mu [Source:HGNC Symbol;Acc:HGNC:2418]	protein_coding
ENSG00000092841	1.73912	9.78465	30.9193	0.000151876	0.00357714	MYL6	12	myosin light chain 6 [Source:HGNC Symbol;Acc:HGNC:7587]	protein_coding
ENSG00000105610	-1.38743	6.3627	30.929	0.000151673	0.00357714	KLF1	19	Kruppel like factor 1 [Source:HGNC Symbol;Acc:HGNC:6345]	protein_coding
ENSG00000120279	1.77414	4.70662	30.9034	0.000152209	0.00357875	MYCT1	6	MYC target 1 [Source:HGNC Symbol;Acc:HGNC:23172]	protein_coding
ENSG00000046889	-8.25391	0.848292	37.2246	0.000153172	0.00359516	PREX2	8	phosphatidylinositol-3,4,5-trisphosphate dependent Rac exchange factor 2 [Source:HGNC Symbol;Acc:HGNC:22950]	protein_coding
ENSG00000168229	5.26162	1.65608	30.8112	0.000154157	0.00361203	PTGDR	14	prostaglandin D2 receptor [Source:HGNC Symbol;Acc:HGNC:9591]	protein_coding
ENSG00000132382	-2.24437	5.6455	30.7661	0.000155123	0.00362837	MYBBP1A	17	MYB binding protein 1a [Source:HGNC Symbol;Acc:HGNC:7546]	protein_coding
ENSG00000138002	-1.25796	4.99893	30.716	0.000156202	0.00364731	IFT172	2	intraflagellar transport 172 [Source:HGNC Symbol;Acc:HGNC:30391]	protein_coding
ENSG00000111907	-2.10655	0.936046	30.6414	0.000157825	0.00367887	TPD52L1	6	TPD52 like 1 [Source:HGNC Symbol;Acc:HGNC:12006]	protein_coding
ENSG00000167414	3.29813	-0.68943	30.6239	0.000158206	0.00368143	GNG8	19	G protein subunit gamma 8 [Source:HGNC Symbol;Acc:HGNC:19664]	protein_coding
ENSG00000166938	-0.747992	6.34873	30.5502	0.000159835	0.00371294	DIS3L	15	DIS3 like exosome 3'-5' exoribonuclease [Source:HGNC Symbol;Acc:HGNC:28698]	protein_coding
ENSG00000059377	1.25238	7.55524	30.517	0.000160576	0.00372377	TBXAS1	7	thromboxane A synthase 1 [Source:HGNC Symbol;Acc:HGNC:11609]	protein_coding
ENSG00000157873	1.03356	5.47223	30.5	0.000160955	0.00372618	TNFRSF14	1	TNF receptor superfamily member 14 [Source:HGNC Symbol;Acc:HGNC:11912]	protein_coding
ENSG00000183690	1.28693	5.01325	30.412	0.000162942	0.00376573	EFHC2	X	EF-hand domain containing 2 [Source:HGNC Symbol;Acc:HGNC:26233]	protein_coding
ENSG00000076382	-0.903161	6.81302	30.3566	0.000164207	0.00378851	SPAG5	17	sperm associated antigen 5 [Source:HGNC Symbol;Acc:HGNC:13452]	protein_coding
ENSG00000142046	1.85583	3.90204	30.3011	0.000165486	0.00381153	TMEM91	19	transmembrane protein 91 [Source:HGNC Symbol;Acc:HGNC:32393]	protein_coding
ENSG00000143476	-1.60742	6.77236	30.267	0.000166275	0.00381673	DTL	1	denticleless E3 ubiquitin protein ligase homolog [Source:HGNC Symbol;Acc:HGNC:30288]	protein_coding
ENSG00000143801	1.34702	4.31097	30.2757	0.000166074	0.00381673	PSEN2	1	presenilin 2 [Source:HGNC Symbol;Acc:HGNC:9509]	protein_coding
ENSG00000135404	1.21004	10.614	30.1856	0.000168185	0.00385402	CD63	12	CD63 molecule [Source:HGNC Symbol;Acc:HGNC:1692]	protein_coding
ENSG00000113140	1.40409	7.53919	30.082	0.000170648	0.00388402	SPARC	5	secreted protein acidic and cysteine rich [Source:HGNC Symbol;Acc:HGNC:11219]	protein_coding
ENSG00000148484	1.81493	8.57356	30.0704	0.000170928	0.00388402	RSU1	10	Ras suppressor protein 1 [Source:HGNC Symbol;Acc:HGNC:10464]	protein_coding
ENSG00000168769	1.09912	7.42062	30.0858	0.000170558	0.00388402	TET2	4	tet methylcytosine dioxygenase 2 [Source:HGNC Symbol;Acc:HGNC:25941]	protein_coding
ENSG00000170340	0.956854	6.7	30.1028	0.00017015	0.00388402	B3GNT2	2	UDP-GlcNAc:betaGal beta-1,3-N-acetylglucosaminyltransferase 2 [Source:HGNC Symbol;Acc:HGNC:15629]	protein_coding
ENSG00000198842	2.81331	0.39107	30.0952	0.000170333	0.00388402	DUSP27	1	dual specificity phosphatase 27, atypical [Source:HGNC Symbol;Acc:HGNC:25034]	protein_coding
ENSG00000276180	1.89638	4.03198	30.0308	0.000171883	0.00389919	H4C9	6	H4 clustered histone 9 [Source:HGNC Symbol;Acc:HGNC:4793]	protein_coding
ENSG00000126246	1.62653	2.93689	30.0172	0.000172213	0.00390013	IGFLR1	19	IGF like family receptor 1 [Source:HGNC Symbol;Acc:HGNC:23620]	protein_coding
ENSG00000116741	2.89401	5.19482	29.9511	0.000173825	0.00393007	RGS2	1	regulator of G protein signaling 2 [Source:HGNC Symbol;Acc:HGNC:9998]	protein_coding
ENSG00000125734	1.39151	6.653	29.93	0.000174344	0.00393307	GPR108	19	G protein-coupled receptor 108 [Source:HGNC Symbol;Acc:HGNC:17829]	protein_coding
ENSG00000197006	2.0736	8.08436	29.9221	0.000174538	0.00393307	METTL9	16	methyltransferase like 9 [Source:HGNC Symbol;Acc:HGNC:24586]	protein_coding
ENSG00000069956	0.931302	5.96144	29.9053	0.000174952	0.00393584	MAPK6	15	mitogen-activated protein kinase 6 [Source:HGNC Symbol;Acc:HGNC:6879]	protein_coding
ENSG00000125898	1.35138	4.15538	29.8685	0.000175866	0.00394702	FAM110A	20	family with sequence similarity 110 member A [Source:HGNC Symbol;Acc:HGNC:16188]	protein_coding
ENSG00000133193	1.12412	5.78311	29.8618	0.000176032	0.00394702	FAM104A	17	family with sequence similarity 104 member A [Source:HGNC Symbol;Acc:HGNC:25918]	protein_coding
ENSG00000102096	1.21086	6.5409	29.8418	0.000176532	0.00395169	PIM2	X	Pim-2 proto-oncogene, serine/threonine kinase [Source:HGNC Symbol;Acc:HGNC:8987]	protein_coding
ENSG00000115520	1.60034	5.51175	29.7592	0.000178609	0.00399159	COQ10B	2	coenzyme Q10B [Source:HGNC Symbol;Acc:HGNC:25819]	protein_coding
ENSG00000141098	-0.781499	4.73405	29.6861	0.00018047	0.00402654	GFOD2	16	glucose-fructose oxidoreductase domain containing 2 [Source:HGNC Symbol;Acc:HGNC:28159]	protein_coding
ENSG00000023445	3.14109	4.52901	29.6506	0.000181383	0.00404024	BIRC3	11	baculoviral IAP repeat containing 3 [Source:HGNC Symbol;Acc:HGNC:591]	protein_coding
ENSG00000120049	1.74026	1.84105	29.6282	0.000181963	0.0040465	KCNIP2	10	potassium voltage-gated channel interacting protein 2 [Source:HGNC Symbol;Acc:HGNC:15522]	protein_coding
ENSG00000100336	0.733606	5.62263	29.5901	0.000182951	0.00405517	APOL4	22	apolipoprotein L4 [Source:HGNC Symbol;Acc:HGNC:14867]	protein_coding
ENSG00000198843	1.14049	7.95104	29.5967	0.000182779	0.00405517	SELENOT	3	selenoprotein T [Source:HGNC Symbol;Acc:HGNC:18136]	protein_coding
ENSG00000077782	-3.12837	4.06119	29.5647	0.000183615	0.00406324	FGFR1	8	fibroblast growth factor receptor 1 [Source:HGNC Symbol;Acc:HGNC:3688]	protein_coding
ENSG00000101290	0.80331	6.24281	29.5382	0.00018431	0.00407196	CDS2	20	CDP-diacylglycerol synthase 2 [Source:HGNC Symbol;Acc:HGNC:1801]	protein_coding
ENSG00000107438	1.2565	8.39836	29.5184	0.000184831	0.00407681	PDLIM1	10	PDZ and LIM domain 1 [Source:HGNC Symbol;Acc:HGNC:2067]	protein_coding
ENSG00000156398	-1.42069	4.86361	29.4472	0.00018672	0.00411179	SFXN2	10	sideroflexin 2 [Source:HGNC Symbol;Acc:HGNC:16086]	protein_coding
ENSG00000111726	1.75287	7.48716	29.4286	0.000187215	0.004116	CMAS	12	cytidine monophosphate N-acetylneuraminic acid synthetase [Source:HGNC Symbol;Acc:HGNC:18290]	protein_coding
ENSG00000140022	1.14902	5.67028	29.4074	0.000187785	0.00412183	STON2	14	stonin 2 [Source:HGNC Symbol;Acc:HGNC:30652]	protein_coding
ENSG00000067606	1.52601	1.8232	29.357	0.000189145	0.00414496	PRKCZ	1	protein kinase C zeta [Source:HGNC Symbol;Acc:HGNC:9412]	protein_coding
ENSG00000133321	1.38088	2.73701	29.3102	0.000190416	0.00416609	PLAAT4	11	phospholipase A and acyltransferase 4 [Source:HGNC Symbol;Acc:HGNC:9869]	protein_coding
ENSG00000163606	1.49003	3.3475	29.2751	0.000191378	0.00418038	CD200R1	3	CD200 receptor 1 [Source:HGNC Symbol;Acc:HGNC:24235]	protein_coding
ENSG00000068796	1.07804	7.42992	29.1719	0.000194238	0.00419686	KIF2A	5	kinesin family member 2A [Source:HGNC Symbol;Acc:HGNC:6318]	protein_coding
ENSG00000104695	1.04104	4.05327	29.2027	0.000193379	0.00419686	PPP2CB	8	protein phosphatase 2 catalytic subunit beta [Source:HGNC Symbol;Acc:HGNC:9300]	protein_coding
ENSG00000121966	1.26493	7.93551	29.1757	0.000194132	0.00419686	CXCR4	2	C-X-C motif chemokine receptor 4 [Source:HGNC Symbol;Acc:HGNC:2561]	protein_coding
ENSG00000135070	1.52055	6.79121	29.1696	0.000194302	0.00419686	ISCA1	9	iron-sulfur cluster assembly 1 [Source:HGNC Symbol;Acc:HGNC:28660]	protein_coding
ENSG00000138095	-1.08633	7.80197	29.1863	0.000193837	0.00419686	LRPPRC	2	leucine rich pentatricopeptide repeat containing [Source:HGNC Symbol;Acc:HGNC:15714]	protein_coding
ENSG00000150556	3.61604	0.786214	29.1954	0.000193582	0.00419686	LYPD6B	2	LY6/PLAUR domain containing 6B [Source:HGNC Symbol;Acc:HGNC:27018]	protein_coding
ENSG00000173638	-1.94974	5.54801	29.2187	0.000192935	0.00419686	SLC19A1	21	solute carrier family 19 member 1 [Source:HGNC Symbol;Acc:HGNC:10937]	protein_coding
ENSG00000120800	-1.5335	4.62911	29.1513	0.000194816	0.00420127	UTP20	12	UTP20 small subunit processome component [Source:HGNC Symbol;Acc:HGNC:17897]	protein_coding
ENSG00000173230	0.875944	7.57957	29.1273	0.000195489	0.00420908	GOLGB1	3	golgin B1 [Source:HGNC Symbol;Acc:HGNC:4429]	protein_coding
ENSG00000104763	1.38825	8.56172	29.0729	0.000197029	0.00423549	ASAH1	8	N-acylsphingosine amidohydrolase 1 [Source:HGNC Symbol;Acc:HGNC:735]	protein_coding
ENSG00000115641	0.942847	6.37449	29.0286	0.000198295	0.00425596	FHL2	2	four and a half LIM domains 2 [Source:HGNC Symbol;Acc:HGNC:3703]	protein_coding
ENSG00000166927	1.36928	3.42137	29.0017	0.000199065	0.00426571	MS4A7	11	membrane spanning 4-domains A7 [Source:HGNC Symbol;Acc:HGNC:13378]	protein_coding
ENSG00000267534	1.57489	1.64118	28.9699	0.000199985	0.00427866	S1PR2	19	sphingosine-1-phosphate receptor 2 [Source:HGNC Symbol;Acc:HGNC:3169]	protein_coding
ENSG00000121236	-1.4346	4.67982	28.9173	0.000201512	0.00430454	TRIM6	11	tripartite motif containing 6 [Source:HGNC Symbol;Acc:HGNC:16277]	protein_coding
ENSG00000176533	0.883737	3.82257	28.9049	0.000201874	0.00430549	GNG7	19	G protein subunit gamma 7 [Source:HGNC Symbol;Acc:HGNC:4410]	protein_coding
ENSG00000108622	1.5644	6.0571	28.8309	0.000204052	0.0043451	ICAM2	17	intercellular adhesion molecule 2 [Source:HGNC Symbol;Acc:HGNC:5345]	protein_coding
ENSG00000154188	1.13245	6.10742	28.8098	0.00020468	0.00435162	ANGPT1	8	angiopoietin 1 [Source:HGNC Symbol;Acc:HGNC:484]	protein_coding
ENSG00000112697	1.10486	7.39095	28.7846	0.00020543	0.00436071	TMEM30A	6	transmembrane protein 30A [Source:HGNC Symbol;Acc:HGNC:16667]	protein_coding
ENSG00000269335	1.02875	3.30912	28.7297	0.000207076	0.00438878	IKBKG	X	inhibitor of nuclear factor kappa B kinase regulatory subunit gamma [Source:HGNC Symbol;Acc:HGNC:5961]	protein_coding
ENSG00000131016	1.63143	6.20511	28.6914	0.000208234	0.0043927	AKAP12	6	A-kinase anchoring protein 12 [Source:HGNC Symbol;Acc:HGNC:370]	protein_coding
ENSG00000149948	-2.00084	2.28957	28.7053	0.000207814	0.0043927	HMGA2	12	high mobility group AT-hook 2 [Source:HGNC Symbol;Acc:HGNC:5009]	protein_coding
ENSG00000221968	1.1163	5.06829	28.6973	0.000208056	0.0043927	FADS3	11	fatty acid desaturase 3 [Source:HGNC Symbol;Acc:HGNC:3576]	protein_coding
ENSG00000140497	0.689107	8.04632	28.6309	0.00021008	0.00442476	SCAMP2	15	secretory carrier membrane protein 2 [Source:HGNC Symbol;Acc:HGNC:10564]	protein_coding
ENSG00000164687	-1.06955	5.63271	28.5932	0.00021124	0.00444226	FABP5	8	fatty acid binding protein 5 [Source:HGNC Symbol;Acc:HGNC:3560]	protein_coding
ENSG00000163735	2.82563	0.639038	28.5545	0.000212439	0.00446057	CXCL5	4	C-X-C motif chemokine ligand 5 [Source:HGNC Symbol;Acc:HGNC:10642]	protein_coding
ENSG00000115561	0.72507	5.63489	28.5279	0.000213265	0.00446407	CHMP3	2	charged multivesicular body protein 3 [Source:HGNC Symbol;Acc:HGNC:29865]	protein_coding
ENSG00000220008	-1.58429	5.1271	28.5331	0.000213104	0.00446407	LINGO3	19	leucine rich repeat and Ig domain containing 3 [Source:HGNC Symbol;Acc:HGNC:21206]	protein_coding
ENSG00000196305	-1.36434	8.67916	28.4686	0.000215125	0.00449605	IARS1	9	isoleucyl-tRNA synthetase 1 [Source:HGNC Symbol;Acc:HGNC:5330]	protein_coding
ENSG00000171159	0.839256	5.28183	28.3751	0.0002181	0.00455119	C9orf16	9	chromosome 9 open reading frame 16 [Source:HGNC Symbol;Acc:HGNC:17823]	protein_coding
ENSG00000093217	-1.42974	2.89425	28.323	0.000219773	0.00457906	XYLB	3	xylulokinase [Source:HGNC Symbol;Acc:HGNC:12839]	protein_coding
ENSG00000083799	0.779984	6.23722	28.2121	0.000223394	0.00461612	CYLD	16	CYLD lysine 63 deubiquitinase [Source:HGNC Symbol;Acc:HGNC:2584]	protein_coding
ENSG00000087237	2.78244	1.41206	28.2025	0.000223712	0.00461612	CETP	16	cholesteryl ester transfer protein [Source:HGNC Symbol;Acc:HGNC:1869]	protein_coding
ENSG00000163629	-1.90589	3.90072	28.1958	0.000223934	0.00461612	PTPN13	4	protein tyrosine phosphatase non-receptor type 13 [Source:HGNC Symbol;Acc:HGNC:9646]	protein_coding
ENSG00000172824	1.91819	1.12141	28.1957	0.000223938	0.00461612	CES4A	16	carboxylesterase 4A [Source:HGNC Symbol;Acc:HGNC:26741]	protein_coding
ENSG00000176046	5.0522	0.823344	28.2196	0.000223149	0.00461612	NUPR1	16	nuclear protein 1, transcriptional regulator [Source:HGNC Symbol;Acc:HGNC:29990]	protein_coding
ENSG00000186480	1.10804	10.0554	28.2269	0.000222909	0.00461612	INSIG1	7	insulin induced gene 1 [Source:HGNC Symbol;Acc:HGNC:6083]	protein_coding
ENSG00000196684	-1.22249	7.85598	28.2461	0.000222276	0.00461612	HSH2D	19	hematopoietic SH2 domain containing [Source:HGNC Symbol;Acc:HGNC:24920]	protein_coding
ENSG00000091039	0.704435	7.21558	28.1603	0.000225109	0.0046332	OSBPL8	12	oxysterol binding protein like 8 [Source:HGNC Symbol;Acc:HGNC:16396]	protein_coding
ENSG00000138439	-1.50695	4.08996	28.0467	0.000228926	0.00469207	FAM117B	2	family with sequence similarity 117 member B [Source:HGNC Symbol;Acc:HGNC:14440]	protein_coding
ENSG00000154229	3.22702	2.3432	28.0503	0.000228804	0.00469207	PRKCA	17	protein kinase C alpha [Source:HGNC Symbol;Acc:HGNC:9393]	protein_coding
ENSG00000164045	-1.75098	4.9599	28.0443	0.000229008	0.00469207	CDC25A	3	cell division cycle 25A [Source:HGNC Symbol;Acc:HGNC:1725]	protein_coding
ENSG00000153767	0.905279	5.07821	28.0175	0.000229919	0.00470362	GTF2E1	3	general transcription factor IIE subunit 1 [Source:HGNC Symbol;Acc:HGNC:4650]	protein_coding
ENSG00000130635	-1.78947	3.86685	27.9755	0.000231356	0.00472587	COL5A1	9	collagen type V alpha 1 chain [Source:HGNC Symbol;Acc:HGNC:2209]	protein_coding
ENSG00000118965	-1.07783	4.30363	27.9479	0.000232308	0.00473817	WDR35	2	WD repeat domain 35 [Source:HGNC Symbol;Acc:HGNC:29250]	protein_coding
ENSG00000140931	0.758268	6.5044	27.9052	0.000233784	0.00474831	CMTM3	16	CKLF like MARVEL transmembrane domain containing 3 [Source:HGNC Symbol;Acc:HGNC:19174]	protein_coding
ENSG00000160551	0.979823	5.45692	27.9232	0.00023316	0.00474831	TAOK1	17	TAO kinase 1 [Source:HGNC Symbol;Acc:HGNC:29259]	protein_coding
ENSG00000164904	-1.08727	4.19403	27.9032	0.000233857	0.00474831	ALDH7A1	5	aldehyde dehydrogenase 7 family member A1 [Source:HGNC Symbol;Acc:HGNC:877]	protein_coding
ENSG00000183850	-1.36627	3.53413	27.8896	0.000234327	0.00475074	ZNF730	19	zinc finger protein 730 [Source:HGNC Symbol;Acc:HGNC:32470]	protein_coding
ENSG00000135338	1.41983	3.48273	27.866	0.000235153	0.00476036	LCA5	6	lebercilin LCA5 [Source:HGNC Symbol;Acc:HGNC:31923]	protein_coding
ENSG00000100403	-1.10931	3.70191	27.8513	0.000235669	0.00476367	ZC3H7B	22	zinc finger CCCH-type containing 7B [Source:HGNC Symbol;Acc:HGNC:30869]	protein_coding
ENSG00000141504	1.16594	4.62784	27.8365	0.00023619	0.00476709	SAT2	17	spermidine/spermine N1-acetyltransferase family member 2 [Source:HGNC Symbol;Acc:HGNC:23160]	protein_coding
ENSG00000111602	-1.49086	7.00851	27.815	0.000236948	0.00477528	TIMELESS	12	timeless circadian regulator [Source:HGNC Symbol;Acc:HGNC:11813]	protein_coding
ENSG00000184226	1.2849	3.43507	27.7706	0.000238523	0.00479988	PCDH9	13	protocadherin 9 [Source:HGNC Symbol;Acc:HGNC:8661]	protein_coding
ENSG00000167705	0.908978	4.45507	27.76	0.000238901	0.00480035	RILP	17	Rab interacting lysosomal protein [Source:HGNC Symbol;Acc:HGNC:30266]	protein_coding
ENSG00000128973	-1.09567	3.94639	27.7081	0.00024076	0.00483053	CLN6	15	CLN6 transmembrane ER protein [Source:HGNC Symbol;Acc:HGNC:2077]	protein_coding
ENSG00000099940	0.821481	5.91204	27.643	0.000243117	0.00486342	SNAP29	22	synaptosome associated protein 29 [Source:HGNC Symbol;Acc:HGNC:11133]	protein_coding
ENSG00000169247	2.2954	0.743619	27.6491	0.000242895	0.00486342	SH3TC2	5	SH3 domain and tetratricopeptide repeats 2 [Source:HGNC Symbol;Acc:HGNC:29427]	protein_coding
ENSG00000112877	-1.21087	3.72026	27.6311	0.000243549	0.00486488	CEP72	5	centrosomal protein 72 [Source:HGNC Symbol;Acc:HGNC:25547]	protein_coding
ENSG00000081087	1.18948	5.80703	27.6163	0.00024409	0.00486566	OSTM1	6	osteoclastogenesis associated transmembrane protein 1 [Source:HGNC Symbol;Acc:HGNC:21652]	protein_coding
ENSG00000138061	2.43835	6.61977	27.6104	0.000244307	0.00486566	CYP1B1	2	cytochrome P450 family 1 subfamily B member 1 [Source:HGNC Symbol;Acc:HGNC:2597]	protein_coding
ENSG00000065150	-1.25867	7.38605	27.5028	0.000248286	0.00490166	IPO5	13	importin 5 [Source:HGNC Symbol;Acc:HGNC:6402]	protein_coding
ENSG00000143479	-1.50545	4.11324	27.5072	0.000248121	0.00490166	DYRK3	1	dual specificity tyrosine phosphorylation regulated kinase 3 [Source:HGNC Symbol;Acc:HGNC:3094]	protein_coding
ENSG00000165392	-1.35496	5.3566	27.5282	0.000247341	0.00490166	WRN	8	WRN RecQ like helicase [Source:HGNC Symbol;Acc:HGNC:12791]	protein_coding
ENSG00000181631	2.13261	3.23366	27.516	0.000247794	0.00490166	P2RY13	3	purinergic receptor P2Y13 [Source:HGNC Symbol;Acc:HGNC:4537]	protein_coding
ENSG00000184992	-0.764804	6.10784	27.5504	0.000246517	0.00490166	BRI3BP	12	BRI3 binding protein [Source:HGNC Symbol;Acc:HGNC:14251]	protein_coding
ENSG00000186088	1.29602	5.1664	27.5403	0.000246889	0.00490166	GSAP	7	gamma-secretase activating protein [Source:HGNC Symbol;Acc:HGNC:28042]	protein_coding
ENSG00000073536	-1.09632	3.95939	27.4528	0.00025016	0.00493146	NLE1	17	notchless homolog 1 [Source:HGNC Symbol;Acc:HGNC:19889]	protein_coding
ENSG00000061918	1.65018	7.34005	27.4142	0.000251617	0.00494459	GUCY1B1	4	guanylate cyclase 1 soluble subunit beta 1 [Source:HGNC Symbol;Acc:HGNC:4687]	protein_coding
ENSG00000169490	0.88301	5.79701	27.4062	0.000251921	0.00494459	TM2D2	8	TM2 domain containing 2 [Source:HGNC Symbol;Acc:HGNC:24127]	protein_coding
ENSG00000211688	2.57783	1.54021	27.4249	0.000251211	0.00494459	TRGJP2	7	T cell receptor gamma joining P2 [Source:HGNC Symbol;Acc:HGNC:12281]	TR_J_gene
ENSG00000082512	-0.777232	4.77865	27.3257	0.000255	0.00499779	TRAF5	1	TNF receptor associated factor 5 [Source:HGNC Symbol;Acc:HGNC:12035]	protein_coding
ENSG00000122140	-0.849187	5.91104	27.2909	0.000256343	0.00501684	MRPS2	9	mitochondrial ribosomal protein S2 [Source:HGNC Symbol;Acc:HGNC:14495]	protein_coding
ENSG00000104814	-0.969024	5.23158	27.2686	0.00025721	0.0050193	MAP4K1	19	mitogen-activated protein kinase kinase kinase kinase 1 [Source:HGNC Symbol;Acc:HGNC:6863]	protein_coding
ENSG00000155858	-1.59991	2.7881	27.2721	0.000257077	0.0050193	LSM11	5	LSM11, U7 small nuclear RNA associated [Source:HGNC Symbol;Acc:HGNC:30860]	protein_coding
ENSG00000173391	4.55299	2.181	27.2451	0.000258126	0.00502992	OLR1	12	oxidized low density lipoprotein receptor 1 [Source:HGNC Symbol;Acc:HGNC:8133]	protein_coding
ENSG00000198805	0.764251	6.95898	27.1957	0.000260066	0.00506046	PNP	14	purine nucleoside phosphorylase [Source:HGNC Symbol;Acc:HGNC:7892]	protein_coding
ENSG00000197405	3.38229	2.88288	27.1763	0.000260831	0.00506805	C5AR1	19	complement C5a receptor 1 [Source:HGNC Symbol;Acc:HGNC:1338]	protein_coding
ENSG00000125037	1.72411	7.29032	27.1245	0.00026289	0.00509744	EMC3	3	ER membrane protein complex subunit 3 [Source:HGNC Symbol;Acc:HGNC:23999]	protein_coding
ENSG00000259207	3.28822	7.31922	27.1194	0.000263096	0.00509744	ITGB3	17	integrin subunit beta 3 [Source:HGNC Symbol;Acc:HGNC:6156]	protein_coding
ENSG00000178921	-2.38119	6.63354	27.0804	0.000264658	0.00512038	PFAS	17	phosphoribosylformylglycinamidine synthase [Source:HGNC Symbol;Acc:HGNC:8863]	protein_coding
ENSG00000100362	4.06476	1.18433	27.0151	0.000267302	0.00516415	PVALB	22	parvalbumin [Source:HGNC Symbol;Acc:HGNC:9704]	protein_coding
ENSG00000152061	1.05063	5.93046	26.8964	0.000272186	0.0052401	RABGAP1L	1	RAB GTPase activating protein 1 like [Source:HGNC Symbol;Acc:HGNC:24663]	protein_coding
ENSG00000183018	-2.93802	4.06094	26.8914	0.000272394	0.0052401	SPNS2	17	sphingolipid transporter 2 [Source:HGNC Symbol;Acc:HGNC:26992]	protein_coding
ENSG00000223496	-0.749125	5.76548	26.8953	0.000272233	0.0052401	EXOSC6	16	exosome component 6 [Source:HGNC Symbol;Acc:HGNC:19055]	protein_coding
ENSG00000151967	2.70413	4.38945	26.8601	0.000273703	0.00525781	SCHIP1	3	schwannomin interacting protein 1 [Source:HGNC Symbol;Acc:HGNC:15678]	protein_coding
ENSG00000139926	-1.98725	3.04819	26.827	0.00027509	0.00527698	FRMD6	14	FERM domain containing 6 [Source:HGNC Symbol;Acc:HGNC:19839]	protein_coding
ENSG00000101868	-1.11531	5.49329	26.7921	0.000276565	0.00529098	POLA1	X	DNA polymerase alpha 1, catalytic subunit [Source:HGNC Symbol;Acc:HGNC:9173]	protein_coding
ENSG00000132326	-1.28471	3.22302	26.7913	0.000276602	0.00529098	PER2	2	period circadian regulator 2 [Source:HGNC Symbol;Acc:HGNC:8846]	protein_coding
ENSG00000146070	3.79988	4.39144	26.7621	0.000277842	0.00530721	PLA2G7	6	phospholipase A2 group VII [Source:HGNC Symbol;Acc:HGNC:9040]	protein_coding
ENSG00000103642	0.953766	5.13503	26.6945	0.000280738	0.00535066	LACTB	15	lactamase beta [Source:HGNC Symbol;Acc:HGNC:16468]	protein_coding
ENSG00000132846	-0.98655	4.51442	26.6723	0.000281697	0.00535066	ZBED3	5	zinc finger BED-type containing 3 [Source:HGNC Symbol;Acc:HGNC:20711]	protein_coding
ENSG00000137409	0.74452	6.74499	26.6821	0.000281277	0.00535066	MTCH1	6	mitochondrial carrier 1 [Source:HGNC Symbol;Acc:HGNC:17586]	protein_coding
ENSG00000143416	-3.82767	1.14684	26.6731	0.000281662	0.00535066	SELENBP1	1	selenium binding protein 1 [Source:HGNC Symbol;Acc:HGNC:10719]	protein_coding
ENSG00000011198	0.865659	5.08148	26.66	0.000282233	0.00535333	ABHD5	3	abhydrolase domain containing 5, lysophosphatidic acid acyltransferase [Source:HGNC Symbol;Acc:HGNC:21396]	protein_coding
ENSG00000103423	-0.933572	6.5545	26.586	0.000285465	0.00539951	DNAJA3	16	DnaJ heat shock protein family (Hsp40) member A3 [Source:HGNC Symbol;Acc:HGNC:11808]	protein_coding
ENSG00000186638	-1.64282	3.89037	26.5917	0.000285217	0.00539951	KIF24	9	kinesin family member 24 [Source:HGNC Symbol;Acc:HGNC:19916]	protein_coding
ENSG00000121989	1.66638	2.40128	26.5345	0.000287741	0.00543497	ACVR2A	2	activin A receptor type 2A [Source:HGNC Symbol;Acc:HGNC:173]	protein_coding
ENSG00000011426	-0.935936	6.30653	26.5155	0.000288588	0.00544339	ANLN	7	anillin actin binding protein [Source:HGNC Symbol;Acc:HGNC:14082]	protein_coding
ENSG00000110811	-1.17643	2.91961	26.49	0.000289729	0.00544971	P3H3	12	prolyl 3-hydroxylase 3 [Source:HGNC Symbol;Acc:HGNC:19318]	protein_coding
ENSG00000186871	-1.6919	4.10303	26.4947	0.000289517	0.00544971	ERCC6L	X	ERCC excision repair 6 like, spindle assembly checkpoint helicase [Source:HGNC Symbol;Acc:HGNC:20794]	protein_coding
ENSG00000007062	-1.08421	4.8696	26.4753	0.000290387	0.00545453	PROM1	4	prominin 1 [Source:HGNC Symbol;Acc:HGNC:9454]	protein_coding
ENSG00000183597	1.3377	5.86132	26.4267	0.000292577	0.00548804	TANGO2	22	transport and golgi organization 2 homolog [Source:HGNC Symbol;Acc:HGNC:25439]	protein_coding
ENSG00000100906	1.75667	7.04531	26.3809	0.000294661	0.00551666	NFKBIA	14	NFKB inhibitor alpha [Source:HGNC Symbol;Acc:HGNC:7797]	protein_coding
ENSG00000122679	3.65897	1.88098	26.3753	0.000294917	0.00551666	RAMP3	7	receptor activity modifying protein 3 [Source:HGNC Symbol;Acc:HGNC:9845]	protein_coding
ENSG00000100711	1.42671	5.63952	26.3633	0.000295463	0.00551924	ZFYVE21	14	zinc finger FYVE-type containing 21 [Source:HGNC Symbol;Acc:HGNC:20760]	protein_coding
ENSG00000149269	-0.719057	5.80174	26.3394	0.000296561	0.00553213	PAK1	11	p21 (RAC1) activated kinase 1 [Source:HGNC Symbol;Acc:HGNC:8590]	protein_coding
ENSG00000160014	0.825922	7.2376	26.3131	0.000297777	0.00553955	CALM3	19	calmodulin 3 [Source:HGNC Symbol;Acc:HGNC:1449]	protein_coding
ENSG00000164134	-1.0557	6.36195	26.3131	0.000297776	0.00553955	NAA15	4	N-alpha-acetyltransferase 15, NatA auxiliary subunit [Source:HGNC Symbol;Acc:HGNC:30782]	protein_coding
ENSG00000189292	1.91087	1.19688	26.3038	0.000298208	0.00553996	ALKAL2	2	ALK and LTK ligand 2 [Source:HGNC Symbol;Acc:HGNC:27683]	protein_coding
ENSG00000100554	1.65939	6.48085	26.1894	0.000303558	0.00563163	ATP6V1D	14	ATPase H+ transporting V1 subunit D [Source:HGNC Symbol;Acc:HGNC:13527]	protein_coding
ENSG00000118513	-0.913096	8.59738	26.1699	0.000304484	0.00564109	MYB	6	MYB proto-oncogene, transcription factor [Source:HGNC Symbol;Acc:HGNC:7545]	protein_coding
ENSG00000134072	2.12529	3.92627	26.1449	0.000305675	0.0056554	CAMK1	3	calcium/calmodulin dependent protein kinase I [Source:HGNC Symbol;Acc:HGNC:1459]	protein_coding
ENSG00000168118	1.2978	6.74347	26.1004	0.000307804	0.00568702	RAB4A	1	RAB4A, member RAS oncogene family [Source:HGNC Symbol;Acc:HGNC:9781]	protein_coding
ENSG00000132256	1.01097	6.18526	26.0812	0.000308729	0.0056886	TRIM5	11	tripartite motif containing 5 [Source:HGNC Symbol;Acc:HGNC:16276]	protein_coding
ENSG00000203485	0.985049	4.10956	26.0861	0.000308494	0.0056886	INF2	14	inverted formin 2 [Source:HGNC Symbol;Acc:HGNC:23791]	protein_coding
ENSG00000114626	0.936374	5.10445	26.0471	0.00031038	0.00569576	ABTB1	3	ankyrin repeat and BTB domain containing 1 [Source:HGNC Symbol;Acc:HGNC:18275]	protein_coding
ENSG00000135148	0.71106	6.36495	26.0532	0.000310086	0.00569576	TRAFD1	12	TRAF-type zinc finger domain containing 1 [Source:HGNC Symbol;Acc:HGNC:24808]	protein_coding
ENSG00000173706	1.81242	4.39795	26.0605	0.000309732	0.00569576	HEG1	3	heart development protein with EGF like domains 1 [Source:HGNC Symbol;Acc:HGNC:29227]	protein_coding
ENSG00000144867	-1.0388	7.10279	26.0342	0.000311004	0.0056995	SRPRB	3	SRP receptor subunit beta [Source:HGNC Symbol;Acc:HGNC:24085]	protein_coding
ENSG00000106868	0.978072	7.15758	25.9948	0.000312929	0.00571158	SUSD1	9	sushi domain containing 1 [Source:HGNC Symbol;Acc:HGNC:25413]	protein_coding
ENSG00000172731	-1.58452	3.07223	26.0011	0.000312623	0.00571158	LRRC20	10	leucine rich repeat containing 20 [Source:HGNC Symbol;Acc:HGNC:23421]	protein_coding
ENSG00000174307	2.67483	4.87095	26.0039	0.000312486	0.00571158	PHLDA3	1	pleckstrin homology like domain family A member 3 [Source:HGNC Symbol;Acc:HGNC:8934]	protein_coding
ENSG00000054356	3.34291	0.426254	25.9684	0.000314227	0.00571985	PTPRN	2	protein tyrosine phosphatase receptor type N [Source:HGNC Symbol;Acc:HGNC:9676]	protein_coding
ENSG00000117586	2.44905	3.76116	25.97	0.000314149	0.00571985	TNFSF4	1	TNF superfamily member 4 [Source:HGNC Symbol;Acc:HGNC:11934]	protein_coding
ENSG00000137575	2.17725	9.50967	25.9526	0.00031501	0.00572239	SDCBP	8	syndecan binding protein [Source:HGNC Symbol;Acc:HGNC:10662]	protein_coding
ENSG00000149925	1.04278	5.80631	25.945	0.000315385	0.00572239	ALDOA	16	aldolase, fructose-bisphosphate A [Source:HGNC Symbol;Acc:HGNC:414]	protein_coding
ENSG00000177697	0.902801	6.68629	25.9321	0.000316021	0.00572239	CD151	11	CD151 molecule (Raph blood group) [Source:HGNC Symbol;Acc:HGNC:1630]	protein_coding
ENSG00000179041	-1.27336	4.23929	25.9314	0.000316056	0.00572239	RRS1	8	ribosome biogenesis regulator 1 homolog [Source:HGNC Symbol;Acc:HGNC:17083]	protein_coding
ENSG00000101187	-1.77246	4.85467	25.9127	0.000316987	0.00573158	SLCO4A1	20	solute carrier organic anion transporter family member 4A1 [Source:HGNC Symbol;Acc:HGNC:10953]	protein_coding
ENSG00000010810	1.18751	6.24482	25.8691	0.000319165	0.0057414	FYN	6	FYN proto-oncogene, Src family tyrosine kinase [Source:HGNC Symbol;Acc:HGNC:4037]	protein_coding
ENSG00000081985	-2.52893	1.50343	25.8679	0.000319226	0.0057414	IL12RB2	1	interleukin 12 receptor subunit beta 2 [Source:HGNC Symbol;Acc:HGNC:5972]	protein_coding
ENSG00000135678	4.33402	4.38875	25.8831	0.000318465	0.0057414	CPM	12	carboxypeptidase M [Source:HGNC Symbol;Acc:HGNC:2311]	protein_coding
ENSG00000137700	-1.08626	5.68377	25.8902	0.000318108	0.0057414	SLC37A4	11	solute carrier family 37 member 4 [Source:HGNC Symbol;Acc:HGNC:4061]	protein_coding
ENSG00000121766	1.0092	6.28171	25.8539	0.000319928	0.0057464	ZCCHC17	1	zinc finger CCHC-type containing 17 [Source:HGNC Symbol;Acc:HGNC:30246]	protein_coding
ENSG00000197622	0.798053	5.48998	25.8437	0.000320442	0.005748	CDC42SE1	1	CDC42 small effector 1 [Source:HGNC Symbol;Acc:HGNC:17719]	protein_coding
ENSG00000163257	-0.815368	5.171	25.8274	0.000321267	0.00575519	DCAF16	4	DDB1 and CUL4 associated factor 16 [Source:HGNC Symbol;Acc:HGNC:25987]	protein_coding
ENSG00000115241	-0.933619	7.31676	25.7884	0.000323246	0.00577742	PPM1G	2	protein phosphatase, Mg2+/Mn2+ dependent 1G [Source:HGNC Symbol;Acc:HGNC:9278]	protein_coding
ENSG00000134461	-1.22666	3.02859	25.7861	0.000323362	0.00577742	ANKRD16	10	ankyrin repeat domain 16 [Source:HGNC Symbol;Acc:HGNC:23471]	protein_coding
ENSG00000001497	-0.802451	6.26675	25.7631	0.000324538	0.00578318	LAS1L	X	LAS1 like ribosome biogenesis factor [Source:HGNC Symbol;Acc:HGNC:25726]	protein_coding
ENSG00000270647	-1.70998	5.21138	25.7639	0.000324495	0.00578318	TAF15	17	TATA-box binding protein associated factor 15 [Source:HGNC Symbol;Acc:HGNC:11547]	protein_coding
ENSG00000103184	4.05715	0.873681	25.6735	0.000329158	0.00585781	SEC14L5	16	SEC14 like lipid binding 5 [Source:HGNC Symbol;Acc:HGNC:29032]	protein_coding
ENSG00000083454	-1.1698	3.56341	25.6532	0.000330217	0.00586894	P2RX5	17	purinergic receptor P2X 5 [Source:HGNC Symbol;Acc:HGNC:8536]	protein_coding
ENSG00000071859	0.828993	5.75175	25.5653	0.000334845	0.00592642	FAM50A	X	family with sequence similarity 50 member A [Source:HGNC Symbol;Acc:HGNC:18786]	protein_coding
ENSG00000132386	2.00206	3.00454	25.553	0.000335501	0.00592642	SERPINF1	17	serpin family F member 1 [Source:HGNC Symbol;Acc:HGNC:8824]	protein_coding
ENSG00000136279	0.846351	7.40851	25.5422	0.000336077	0.00592642	DBNL	7	drebrin like [Source:HGNC Symbol;Acc:HGNC:2696]	protein_coding
ENSG00000136630	1.68207	2.30777	25.5425	0.00033606	0.00592642	HLX	1	H2.0 like homeobox [Source:HGNC Symbol;Acc:HGNC:4978]	protein_coding
ENSG00000140379	1.76765	4.0417	25.5771	0.000334219	0.00592642	BCL2A1	15	BCL2 related protein A1 [Source:HGNC Symbol;Acc:HGNC:991]	protein_coding
ENSG00000163898	2.07775	1.40173	25.5516	0.000335575	0.00592642	LIPH	3	lipase H [Source:HGNC Symbol;Acc:HGNC:18483]	protein_coding
ENSG00000122042	0.903927	4.32554	25.5338	0.000336523	0.00592657	UBL3	13	ubiquitin like 3 [Source:HGNC Symbol;Acc:HGNC:12504]	protein_coding
ENSG00000011143	-0.871085	5.25646	25.4863	0.000339074	0.00593176	MKS1	17	MKS transition zone complex subunit 1 [Source:HGNC Symbol;Acc:HGNC:7121]	protein_coding
ENSG00000070047	-1.31482	5.46788	25.4713	0.000339884	0.00593176	PHRF1	11	PHD and ring finger domains 1 [Source:HGNC Symbol;Acc:HGNC:24351]	protein_coding
ENSG00000078237	2.0215	1.34189	25.4975	0.00033847	0.00593176	TIGAR	12	TP53 induced glycolysis regulatory phosphatase [Source:HGNC Symbol;Acc:HGNC:1185]	protein_coding
ENSG00000121152	-0.965308	6.31739	25.4964	0.000338527	0.00593176	NCAPH	2	non-SMC condensin I complex subunit H [Source:HGNC Symbol;Acc:HGNC:1112]	protein_coding
ENSG00000166965	-1.11816	4.71089	25.4778	0.000339528	0.00593176	RCCD1	15	RCC1 domain containing 1 [Source:HGNC Symbol;Acc:HGNC:30457]	protein_coding
ENSG00000167670	-1.67199	5.95081	25.479	0.000339467	0.00593176	CHAF1A	19	chromatin assembly factor 1 subunit A [Source:HGNC Symbol;Acc:HGNC:1910]	protein_coding
ENSG00000175395	0.888596	4.22565	25.4714	0.000339877	0.00593176	ZNF25	10	zinc finger protein 25 [Source:HGNC Symbol;Acc:HGNC:13043]	protein_coding
ENSG00000158106	-1.35294	3.74366	25.4549	0.000340771	0.00593959	RHPN1	8	rhophilin Rho GTPase binding protein 1 [Source:HGNC Symbol;Acc:HGNC:19973]	protein_coding
ENSG00000128059	-0.927301	5.85731	25.4444	0.000341337	0.0059418	PPAT	4	phosphoribosyl pyrophosphate amidotransferase [Source:HGNC Symbol;Acc:HGNC:9238]	protein_coding
ENSG00000181374	8.18723	0.932233	25.3929	0.000344148	0.00598306	CCL13	17	C-C motif chemokine ligand 13 [Source:HGNC Symbol;Acc:HGNC:10611]	protein_coding
ENSG00000109586	-0.67014	6.05527	25.3367	0.000347247	0.00602919	GALNT7	4	polypeptide N-acetylgalactosaminyltransferase 7 [Source:HGNC Symbol;Acc:HGNC:4129]	protein_coding
ENSG00000025708	1.38669	5.14962	25.286	0.000350069	0.00604925	TYMP	22	thymidine phosphorylase [Source:HGNC Symbol;Acc:HGNC:3148]	protein_coding
ENSG00000144681	1.34184	3.71665	25.2839	0.000350189	0.00604925	STAC	3	SH3 and cysteine rich domain [Source:HGNC Symbol;Acc:HGNC:11353]	protein_coding
ENSG00000146918	-0.891232	6.81104	25.3051	0.000349005	0.00604925	NCAPG2	7	non-SMC condensin II complex subunit G2 [Source:HGNC Symbol;Acc:HGNC:21904]	protein_coding
ENSG00000165490	-0.965006	4.97252	25.2857	0.000350086	0.00604925	DDIAS	11	DNA damage induced apoptosis suppressor [Source:HGNC Symbol;Acc:HGNC:26351]	protein_coding
ENSG00000149136	-0.77543	6.4973	25.2613	0.000351456	0.00606339	SSRP1	11	structure specific recognition protein 1 [Source:HGNC Symbol;Acc:HGNC:11327]	protein_coding
ENSG00000123892	0.999965	5.60317	25.2074	0.000354502	0.00610818	RAB38	11	RAB38, member RAS oncogene family [Source:HGNC Symbol;Acc:HGNC:9776]	protein_coding
ENSG00000132199	-0.833896	6.42511	25.1911	0.000355427	0.00611632	ENOSF1	18	enolase superfamily member 1 [Source:HGNC Symbol;Acc:HGNC:30365]	protein_coding
ENSG00000014138	-1.03296	3.98406	25.1662	0.000356849	0.00613301	POLA2	11	DNA polymerase alpha 2, accessory subunit [Source:HGNC Symbol;Acc:HGNC:30073]	protein_coding
ENSG00000160208	-0.868182	6.41142	25.0717	0.000362304	0.00621887	RRP1B	21	ribosomal RNA processing 1B [Source:HGNC Symbol;Acc:HGNC:23818]	protein_coding
ENSG00000163781	-0.993581	6.775	25.0445	0.000363895	0.00623826	TOPBP1	3	DNA topoisomerase II binding protein 1 [Source:HGNC Symbol;Acc:HGNC:17008]	protein_coding
ENSG00000183077	-1.05256	3.7989	25.0186	0.000365416	0.00625642	AFMID	17	arylformamidase [Source:HGNC Symbol;Acc:HGNC:20910]	protein_coding
ENSG00000010318	-0.762535	5.07195	25.0069	0.000366106	0.00626032	PHF7	3	PHD finger protein 7 [Source:HGNC Symbol;Acc:HGNC:18458]	protein_coding
ENSG00000115828	2.79502	4.78973	24.996	0.000366746	0.00626336	QPCT	2	glutaminyl-peptide cyclotransferase [Source:HGNC Symbol;Acc:HGNC:9753]	protein_coding
ENSG00000163818	-1.06802	4.88833	24.9774	0.000367851	0.00626975	LZTFL1	3	leucine zipper transcription factor like 1 [Source:HGNC Symbol;Acc:HGNC:6741]	protein_coding
ENSG00000244405	-1.53116	4.32961	24.9741	0.000368046	0.00626975	ETV5	3	ETS variant transcription factor 5 [Source:HGNC Symbol;Acc:HGNC:3494]	protein_coding
ENSG00000138069	0.863093	7.88306	24.9515	0.000369391	0.00628475	RAB1A	2	RAB1A, member RAS oncogene family [Source:HGNC Symbol;Acc:HGNC:9758]	protein_coding
ENSG00000174233	1.98522	6.26934	24.9004	0.000372446	0.00632085	ADCY6	12	adenylate cyclase 6 [Source:HGNC Symbol;Acc:HGNC:237]	protein_coding
ENSG00000186591	0.960208	6.01884	24.9046	0.000372195	0.00632085	UBE2H	7	ubiquitin conjugating enzyme E2 H [Source:HGNC Symbol;Acc:HGNC:12484]	protein_coding
ENSG00000100100	1.53869	3.42552	24.8411	0.000376037	0.00635789	PIK3IP1	22	phosphoinositide-3-kinase interacting protein 1 [Source:HGNC Symbol;Acc:HGNC:24942]	protein_coding
ENSG00000166848	0.966615	7.37252	24.8476	0.000375641	0.00635789	TERF2IP	16	TERF2 interacting protein [Source:HGNC Symbol;Acc:HGNC:19246]	protein_coding
ENSG00000186577	1.35769	5.16738	24.846	0.000375742	0.00635789	SMIM29	6	small integral membrane protein 29 [Source:HGNC Symbol;Acc:HGNC:1340]	protein_coding
ENSG00000106852	-7.36697	-0.175705	29.2183	0.000377783	0.0063773	LHX6	9	LIM homeobox 6 [Source:HGNC Symbol;Acc:HGNC:21735]	protein_coding
ENSG00000112367	1.02812	5.7483	24.8021	0.000378422	0.0063773	FIG4	6	FIG4 phosphoinositide 5-phosphatase [Source:HGNC Symbol;Acc:HGNC:16873]	protein_coding
ENSG00000162616	1.18021	4.77477	24.7992	0.000378598	0.0063773	DNAJB4	1	DnaJ heat shock protein family (Hsp40) member B4 [Source:HGNC Symbol;Acc:HGNC:14886]	protein_coding
ENSG00000198554	-0.746417	5.92885	24.7641	0.000380759	0.00640574	WDHD1	14	WD repeat and HMG-box DNA binding protein 1 [Source:HGNC Symbol;Acc:HGNC:23170]	protein_coding
ENSG00000106263	-0.907755	8.52517	24.7253	0.000383162	0.00643019	EIF3B	7	eukaryotic translation initiation factor 3 subunit B [Source:HGNC Symbol;Acc:HGNC:3280]	protein_coding
ENSG00000197415	3.66548	0.642163	24.732	0.000382748	0.00643019	VEPH1	3	ventricular zone expressed PH domain containing 1 [Source:HGNC Symbol;Acc:HGNC:25735]	protein_coding
ENSG00000012817	-2.31384	4.83084	24.6589	0.000387326	0.00649202	KDM5D	Y	lysine demethylase 5D [Source:HGNC Symbol;Acc:HGNC:11115]	protein_coding
ENSG00000143546	2.47423	6.01014	24.6194	0.000389825	0.00652583	S100A8	1	S100 calcium binding protein A8 [Source:HGNC Symbol;Acc:HGNC:10498]	protein_coding
ENSG00000080345	-0.981279	7.23491	24.5798	0.000392344	0.00654408	RIF1	2	replication timing regulatory factor 1 [Source:HGNC Symbol;Acc:HGNC:23207]	protein_coding
ENSG00000140534	-1.83643	4.98086	24.572	0.000392848	0.00654408	TICRR	15	TOPBP1 interacting checkpoint and replication regulator [Source:HGNC Symbol;Acc:HGNC:28704]	protein_coding
ENSG00000140682	1.98258	3.7326	24.5769	0.000392532	0.00654408	TGFB1I1	16	transforming growth factor beta 1 induced transcript 1 [Source:HGNC Symbol;Acc:HGNC:11767]	protein_coding
ENSG00000211899	-1.31315	4.2797	24.5877	0.000391843	0.00654408	IGHM	14	immunoglobulin heavy constant mu [Source:HGNC Symbol;Acc:HGNC:5541]	IG_C_gene
ENSG00000122512	-1.0509	4.43039	24.5446	0.000394608	0.00655888	PMS2	7	PMS1 homolog 2, mismatch repair system component [Source:HGNC Symbol;Acc:HGNC:9122]	protein_coding
ENSG00000196363	-1.08476	5.71878	24.5431	0.000394705	0.00655888	WDR5	9	WD repeat domain 5 [Source:HGNC Symbol;Acc:HGNC:12757]	protein_coding
ENSG00000186204	3.07554	2.38251	24.5116	0.000396737	0.00658457	CYP4F12	19	cytochrome P450 family 4 subfamily F member 12 [Source:HGNC Symbol;Acc:HGNC:18857]	protein_coding
ENSG00000125166	-0.751594	7.48938	24.4778	0.00039894	0.00660495	GOT2	16	glutamic-oxaloacetic transaminase 2 [Source:HGNC Symbol;Acc:HGNC:4433]	protein_coding
ENSG00000163734	3.58011	4.55799	24.4819	0.000398672	0.00660495	CXCL3	4	C-X-C motif chemokine ligand 3 [Source:HGNC Symbol;Acc:HGNC:4604]	protein_coding
ENSG00000174944	2.24793	2.51601	24.4608	0.000400051	0.00661525	P2RY14	3	purinergic receptor P2Y14 [Source:HGNC Symbol;Acc:HGNC:16442]	protein_coding
ENSG00000206531	2.87063	2.13943	24.4274	0.000402244	0.0066434	CD200R1L	3	CD200 receptor 1 like [Source:HGNC Symbol;Acc:HGNC:24665]	protein_coding
ENSG00000018189	-0.755213	4.64722	24.3835	0.00040515	0.00668325	RUFY3	4	RUN and FYVE domain containing 3 [Source:HGNC Symbol;Acc:HGNC:30285]	protein_coding
ENSG00000164117	1.36086	4.06888	24.3739	0.000405784	0.00668556	FBXO8	4	F-box protein 8 [Source:HGNC Symbol;Acc:HGNC:13587]	protein_coding
ENSG00000007264	-1.01978	5.24267	24.3574	0.000406889	0.00668749	MATK	19	megakaryocyte-associated tyrosine kinase [Source:HGNC Symbol;Acc:HGNC:6906]	protein_coding
ENSG00000104055	2.25703	1.95488	24.3607	0.000406669	0.00668749	TGM5	15	transglutaminase 5 [Source:HGNC Symbol;Acc:HGNC:11781]	protein_coding
ENSG00000160214	-0.855093	5.81096	24.3361	0.000408315	0.0067028	RRP1	21	ribosomal RNA processing 1 [Source:HGNC Symbol;Acc:HGNC:18785]	protein_coding
ENSG00000065615	0.798745	6.27414	24.3084	0.000410177	0.00672521	CYB5R4	6	cytochrome b5 reductase 4 [Source:HGNC Symbol;Acc:HGNC:20147]	protein_coding
ENSG00000107404	-1.31188	3.02102	24.2606	0.000413415	0.00675662	DVL1	1	dishevelled segment polarity protein 1 [Source:HGNC Symbol;Acc:HGNC:3084]	protein_coding
ENSG00000119138	1.67473	1.8966	24.2351	0.000415151	0.00675662	KLF9	9	Kruppel like factor 9 [Source:HGNC Symbol;Acc:HGNC:1123]	protein_coding
ENSG00000132749	-1.14311	4.86185	24.2288	0.000415585	0.00675662	TESMIN	11	testis expressed metallothionein like protein [Source:HGNC Symbol;Acc:HGNC:7446]	protein_coding
ENSG00000141510	-1.28249	6.19032	24.2301	0.000415493	0.00675662	TP53	17	tumor protein p53 [Source:HGNC Symbol;Acc:HGNC:11998]	protein_coding
ENSG00000164733	1.39052	9.1043	24.2304	0.000415478	0.00675662	CTSB	8	cathepsin B [Source:HGNC Symbol;Acc:HGNC:2527]	protein_coding
ENSG00000170891	1.41994	8.25256	24.2322	0.000415349	0.00675662	CYTL1	4	cytokine like 1 [Source:HGNC Symbol;Acc:HGNC:24435]	protein_coding
ENSG00000186603	-2.62716	3.32807	24.2579	0.000413597	0.00675662	HPDL	1	4-hydroxyphenylpyruvate dioxygenase like [Source:HGNC Symbol;Acc:HGNC:28242]	protein_coding
ENSG00000179593	4.16858	-0.787776	24.2128	0.000416684	0.00675826	ALOX15B	17	arachidonate 15-lipoxygenase type B [Source:HGNC Symbol;Acc:HGNC:434]	protein_coding
ENSG00000267060	2.13509	2.76646	24.2198	0.000416201	0.00675826	PTGES3L	17	prostaglandin E synthase 3 like [Source:HGNC Symbol;Acc:HGNC:43943]	protein_coding
ENSG00000151413	-0.963519	3.99305	24.1745	0.000419321	0.0067929	NUBPL	14	nucleotide binding protein like [Source:HGNC Symbol;Acc:HGNC:20278]	protein_coding
ENSG00000196975	1.13294	6.69621	24.155	0.000420675	0.00680669	ANXA4	2	annexin A4 [Source:HGNC Symbol;Acc:HGNC:542]	protein_coding
ENSG00000046604	-1.2355	5.23353	24.1169	0.000423332	0.00680995	DSG2	18	desmoglein 2 [Source:HGNC Symbol;Acc:HGNC:3049]	protein_coding
ENSG00000105516	-1.43455	3.34633	24.1381	0.000421849	0.00680995	DBP	19	D-box binding PAR bZIP transcription factor [Source:HGNC Symbol;Acc:HGNC:2697]	protein_coding
ENSG00000143353	1.52297	5.37522	24.1161	0.00042339	0.00680995	LYPLAL1	1	lysophospholipase like 1 [Source:HGNC Symbol;Acc:HGNC:20440]	protein_coding
ENSG00000177272	3.27532	0.726898	24.1245	0.000422799	0.00680995	KCNA3	1	potassium voltage-gated channel subfamily A member 3 [Source:HGNC Symbol;Acc:HGNC:6221]	protein_coding
ENSG00000184117	-0.742814	6.16154	24.1298	0.000422426	0.00680995	NIPSNAP1	22	nipsnap homolog 1 [Source:HGNC Symbol;Acc:HGNC:7827]	protein_coding
ENSG00000101361	-0.795053	7.96979	24.0845	0.000425606	0.00682127	NOP56	20	NOP56 ribonucleoprotein [Source:HGNC Symbol;Acc:HGNC:15911]	protein_coding
ENSG00000109685	-1.00277	7.14216	24.088	0.00042536	0.00682127	NSD2	4	nuclear receptor binding SET domain protein 2 [Source:HGNC Symbol;Acc:HGNC:12766]	protein_coding
ENSG00000159388	2.13541	6.32051	24.0913	0.000425131	0.00682127	BTG2	1	BTG anti-proliferation factor 2 [Source:HGNC Symbol;Acc:HGNC:1131]	protein_coding
ENSG00000135476	-1.28359	4.95281	24.0678	0.000426785	0.00683208	ESPL1	12	extra spindle pole bodies like 1, separase [Source:HGNC Symbol;Acc:HGNC:16856]	protein_coding
ENSG00000084733	0.715068	8.40944	24.0483	0.000428166	0.0068461	RAB10	2	RAB10, member RAS oncogene family [Source:HGNC Symbol;Acc:HGNC:9759]	protein_coding
ENSG00000162129	-0.920245	5.40308	24.0292	0.000429521	0.00685968	CLPB	11	caseinolytic mitochondrial matrix peptidase chaperone subunit B [Source:HGNC Symbol;Acc:HGNC:30664]	protein_coding
ENSG00000171401	-4.28847	-0.553959	24.0132	0.000430663	0.00686981	KRT13	17	keratin 13 [Source:HGNC Symbol;Acc:HGNC:6415]	protein_coding
ENSG00000265190	4.81924	-0.696626	23.9966	0.00043185	0.00688065	ANXA8	10	annexin A8 [Source:HGNC Symbol;Acc:HGNC:546]	protein_coding
ENSG00000029153	-0.845996	4.81778	23.9562	0.000434754	0.00691066	ARNTL2	12	aryl hydrocarbon receptor nuclear translocator like 2 [Source:HGNC Symbol;Acc:HGNC:18984]	protein_coding
ENSG00000178105	-1.18407	5.50943	23.9608	0.000434421	0.00691066	DDX10	11	DEAD-box helicase 10 [Source:HGNC Symbol;Acc:HGNC:2735]	protein_coding
ENSG00000123178	1.52298	4.55212	23.9368	0.000436163	0.0069168	SPRYD7	13	SPRY domain containing 7 [Source:HGNC Symbol;Acc:HGNC:14297]	protein_coding
ENSG00000134352	1.47529	5.31012	23.9414	0.000435827	0.0069168	IL6ST	5	interleukin 6 signal transducer [Source:HGNC Symbol;Acc:HGNC:6021]	protein_coding
ENSG00000275302	4.95438	0.885674	23.9295	0.000436687	0.00691702	CCL4	17	C-C motif chemokine ligand 4 [Source:HGNC Symbol;Acc:HGNC:10630]	protein_coding
ENSG00000148925	0.824521	5.76992	23.9189	0.000437456	0.0069211	BTBD10	11	BTB domain containing 10 [Source:HGNC Symbol;Acc:HGNC:21445]	protein_coding
ENSG00000137947	0.920821	6.29252	23.9048	0.000438484	0.00692121	GTF2B	1	general transcription factor IIB [Source:HGNC Symbol;Acc:HGNC:4648]	protein_coding
ENSG00000147416	1.55892	8.11532	23.9114	0.000438006	0.00692121	ATP6V1B2	8	ATPase H+ transporting V1 subunit B2 [Source:HGNC Symbol;Acc:HGNC:854]	protein_coding
ENSG00000164181	1.89052	5.89009	23.8455	0.000442838	0.00698178	ELOVL7	5	ELOVL fatty acid elongase 7 [Source:HGNC Symbol;Acc:HGNC:26292]	protein_coding
ENSG00000178860	5.19642	1.40887	23.8308	0.000443925	0.00699078	MSC	8	musculin [Source:HGNC Symbol;Acc:HGNC:7321]	protein_coding
ENSG00000178202	-1.26364	5.60613	23.8066	0.000445716	0.00701084	POGLUT3	11	protein O-glucosyltransferase 3 [Source:HGNC Symbol;Acc:HGNC:28496]	protein_coding
ENSG00000039068	-3.37677	4.14175	23.773	0.000448229	0.00704219	CDH1	16	cadherin 1 [Source:HGNC Symbol;Acc:HGNC:1748]	protein_coding
ENSG00000131080	2.68804	4.57823	23.7584	0.000449319	0.00704465	EDA2R	X	ectodysplasin A2 receptor [Source:HGNC Symbol;Acc:HGNC:17756]	protein_coding
ENSG00000181788	0.687469	6.80956	23.757	0.000449426	0.00704465	SIAH2	3	siah E3 ubiquitin protein ligase 2 [Source:HGNC Symbol;Acc:HGNC:10858]	protein_coding
ENSG00000100842	7.30741	-1.56414	27.8238	0.000450871	0.00705119	EFS	14	embryonal Fyn-associated substrate [Source:HGNC Symbol;Acc:HGNC:16898]	protein_coding
ENSG00000185379	-1.02498	5.10676	23.7376	0.000450885	0.00705119	RAD51D	17	RAD51 paralog D [Source:HGNC Symbol;Acc:HGNC:9823]	protein_coding
ENSG00000087269	-0.940623	5.77334	23.7081	0.000453117	0.00706978	NOP14	4	NOP14 nucleolar protein [Source:HGNC Symbol;Acc:HGNC:16821]	protein_coding
ENSG00000185219	-1.0451	4.68439	23.713	0.000452742	0.00706978	ZNF445	3	zinc finger protein 445 [Source:HGNC Symbol;Acc:HGNC:21018]	protein_coding
ENSG00000148498	2.19525	0.701699	23.6815	0.00045514	0.00709302	PARD3	10	par-3 family cell polarity regulator [Source:HGNC Symbol;Acc:HGNC:16051]	protein_coding
ENSG00000155846	-1.77295	3.78494	23.6747	0.000455654	0.00709302	PPARGC1B	5	PPARG coactivator 1 beta [Source:HGNC Symbol;Acc:HGNC:30022]	protein_coding
ENSG00000005486	1.26793	7.41009	23.6383	0.000458445	0.00712009	RHBDD2	7	rhomboid domain containing 2 [Source:HGNC Symbol;Acc:HGNC:23082]	protein_coding
ENSG00000168765	1.04182	5.10217	23.6399	0.000458319	0.00712009	GSTM4	1	glutathione S-transferase mu 4 [Source:HGNC Symbol;Acc:HGNC:4636]	protein_coding
ENSG00000221829	-0.832394	5.79311	23.6285	0.000459198	0.00712362	FANCG	9	FA complementation group G [Source:HGNC Symbol;Acc:HGNC:3588]	protein_coding
ENSG00000159346	1.01858	7.45907	23.6177	0.000460033	0.00712841	ADIPOR1	1	adiponectin receptor 1 [Source:HGNC Symbol;Acc:HGNC:24040]	protein_coding
ENSG00000086200	-0.784197	5.77227	23.5858	0.000462505	0.00715851	IPO11	5	importin 11 [Source:HGNC Symbol;Acc:HGNC:20628]	protein_coding
ENSG00000053371	-0.796156	6.25703	23.5782	0.000463096	0.00715949	AKR7A2	1	aldo-keto reductase family 7 member A2 [Source:HGNC Symbol;Acc:HGNC:389]	protein_coding
ENSG00000124731	3.11343	0.725584	23.5683	0.000463865	0.0071632	TREM1	6	triggering receptor expressed on myeloid cells 1 [Source:HGNC Symbol;Acc:HGNC:17760]	protein_coding
ENSG00000101928	0.989016	4.28109	23.5219	0.000467495	0.00717375	MOSPD1	X	motile sperm domain containing 1 [Source:HGNC Symbol;Acc:HGNC:25235]	protein_coding
ENSG00000154760	-1.68629	5.39468	23.519	0.000467726	0.00717375	SLFN13	17	schlafen family member 13 [Source:HGNC Symbol;Acc:HGNC:26481]	protein_coding
ENSG00000164924	0.799038	9.65525	23.5302	0.000466842	0.00717375	YWHAZ	8	tyrosine 3-monooxygenase/tryptophan 5-monooxygenase activation protein zeta [Source:HGNC Symbol;Acc:HGNC:12855]	protein_coding
ENSG00000169764	0.864019	8.40411	23.5408	0.000466009	0.00717375	UGP2	2	UDP-glucose pyrophosphorylase 2 [Source:HGNC Symbol;Acc:HGNC:12527]	protein_coding
ENSG00000184602	2.26617	4.82919	23.5306	0.000466816	0.00717375	SNN	16	stannin [Source:HGNC Symbol;Acc:HGNC:11149]	protein_coding
ENSG00000198417	1.91268	1.33428	23.5394	0.000466121	0.00717375	MT1F	16	metallothionein 1F [Source:HGNC Symbol;Acc:HGNC:7398]	protein_coding
ENSG00000176973	1.07885	3.53994	23.5093	0.000468492	0.00717735	FAM89B	11	family with sequence similarity 89 member B [Source:HGNC Symbol;Acc:HGNC:16708]	protein_coding
ENSG00000178952	-0.678266	8.24428	23.4621	0.000472231	0.00721832	TUFM	16	Tu translation elongation factor, mitochondrial [Source:HGNC Symbol;Acc:HGNC:12420]	protein_coding
ENSG00000204420	2.0015	7.84242	23.4676	0.000471792	0.00721832	MPIG6B	6	megakaryocyte and platelet inhibitory receptor G6b [Source:HGNC Symbol;Acc:HGNC:13937]	protein_coding
ENSG00000168310	1.10956	5.15022	23.4052	0.000476783	0.00727968	IRF2	4	interferon regulatory factor 2 [Source:HGNC Symbol;Acc:HGNC:6117]	protein_coding
ENSG00000143507	0.718158	5.95265	23.3913	0.000477909	0.00728865	DUSP10	1	dual specificity phosphatase 10 [Source:HGNC Symbol;Acc:HGNC:3065]	protein_coding
ENSG00000176171	0.923552	5.12226	23.3725	0.000479426	0.00730356	BNIP3	10	BCL2 interacting protein 3 [Source:HGNC Symbol;Acc:HGNC:1084]	protein_coding
ENSG00000115942	-1.15101	5.56214	23.3201	0.000483692	0.00736027	ORC2	2	origin recognition complex subunit 2 [Source:HGNC Symbol;Acc:HGNC:8488]	protein_coding
ENSG00000072501	-1.16154	7.9497	23.3004	0.000485309	0.00736832	SMC1A	X	structural maintenance of chromosomes 1A [Source:HGNC Symbol;Acc:HGNC:11111]	protein_coding
ENSG00000186074	1.30236	5.94639	23.3007	0.000485286	0.00736832	CD300LF	17	CD300 molecule like family member f [Source:HGNC Symbol;Acc:HGNC:29883]	protein_coding
ENSG00000186431	2.92952	3.51351	23.2619	0.000488492	0.00740834	FCAR	19	Fc fragment of IgA receptor [Source:HGNC Symbol;Acc:HGNC:3608]	protein_coding
ENSG00000118263	1.29958	4.44251	23.239	0.000490392	0.00742053	KLF7	2	Kruppel like factor 7 [Source:HGNC Symbol;Acc:HGNC:6350]	protein_coding
ENSG00000143387	1.94749	1.14324	23.2435	0.000490016	0.00742053	CTSK	1	cathepsin K [Source:HGNC Symbol;Acc:HGNC:2536]	protein_coding
ENSG00000109103	1.21932	4.7329	23.221	0.000491889	0.00742701	UNC119	17	unc-119 lipid binding chaperone [Source:HGNC Symbol;Acc:HGNC:12565]	protein_coding
ENSG00000129625	0.700057	7.16448	23.2141	0.000492465	0.00742701	REEP5	5	receptor accessory protein 5 [Source:HGNC Symbol;Acc:HGNC:30077]	protein_coding
ENSG00000198176	-0.703918	8.18311	23.2181	0.000492136	0.00742701	TFDP1	13	transcription factor Dp-1 [Source:HGNC Symbol;Acc:HGNC:11749]	protein_coding
ENSG00000205436	1.59586	1.52291	23.1284	0.000499702	0.00752777	EXOC3L4	14	exocyst complex component 3 like 4 [Source:HGNC Symbol;Acc:HGNC:20120]	protein_coding
ENSG00000121570	-1.01368	5.74869	23.1208	0.000500343	0.00752905	DPPA4	3	developmental pluripotency associated 4 [Source:HGNC Symbol;Acc:HGNC:19200]	protein_coding
ENSG00000113569	-1.60463	6.01858	23.0935	0.000502676	0.00753131	NUP155	5	nucleoporin 155 [Source:HGNC Symbol;Acc:HGNC:8063]	protein_coding
ENSG00000182093	1.24043	6.02205	23.093	0.000502718	0.00753131	GET1	21	guided entry of tail-anchored proteins factor 1 [Source:HGNC Symbol;Acc:HGNC:12790]	protein_coding
ENSG00000184203	0.717438	5.94119	23.0989	0.000502215	0.00753131	PPP1R2	3	protein phosphatase 1 regulatory inhibitor subunit 2 [Source:HGNC Symbol;Acc:HGNC:9288]	protein_coding
ENSG00000228474	1.25112	8.02627	23.1067	0.000501551	0.00753131	OST4	2	oligosaccharyltransferase complex subunit 4, non-catalytic [Source:HGNC Symbol;Acc:HGNC:32483]	protein_coding
ENSG00000115841	1.1469	3.55663	23.0715	0.000504568	0.00755067	RMDN2	2	regulator of microtubule dynamics 2 [Source:HGNC Symbol;Acc:HGNC:26567]	protein_coding
ENSG00000119285	-1.65253	6.06999	23.0554	0.000505953	0.00756305	HEATR1	1	HEAT repeat containing 1 [Source:HGNC Symbol;Acc:HGNC:25517]	protein_coding
ENSG00000105173	-0.904182	3.98252	22.9999	0.000510778	0.00760212	CCNE1	19	cyclin E1 [Source:HGNC Symbol;Acc:HGNC:1589]	protein_coding
ENSG00000105327	1.81509	3.73247	22.9995	0.000510812	0.00760212	BBC3	19	BCL2 binding component 3 [Source:HGNC Symbol;Acc:HGNC:17868]	protein_coding
ENSG00000107317	2.39561	1.41929	23.0023	0.000510566	0.00760212	PTGDS	9	prostaglandin D2 synthase [Source:HGNC Symbol;Acc:HGNC:9592]	protein_coding
ENSG00000162704	1.53592	9.11236	23.0113	0.000509778	0.00760212	ARPC5	1	actin related protein 2/3 complex subunit 5 [Source:HGNC Symbol;Acc:HGNC:708]	protein_coding
ENSG00000109466	1.14503	5.0063	22.9578	0.000514464	0.00764806	KLHL2	4	kelch like family member 2 [Source:HGNC Symbol;Acc:HGNC:6353]	protein_coding
ENSG00000101844	1.43764	4.85573	22.914	0.000518342	0.00768883	ATG4A	X	autophagy related 4A cysteine peptidase [Source:HGNC Symbol;Acc:HGNC:16489]	protein_coding
ENSG00000145604	-1.03541	6.08103	22.9178	0.000518006	0.00768883	SKP2	5	S-phase kinase associated protein 2 [Source:HGNC Symbol;Acc:HGNC:10901]	protein_coding
ENSG00000167110	0.788542	4.25225	22.8966	0.000519885	0.00770328	GOLGA2	9	golgin A2 [Source:HGNC Symbol;Acc:HGNC:4425]	protein_coding
ENSG00000173559	1.21985	5.35919	22.8716	0.000522122	0.00772309	NABP1	2	nucleic acid binding protein 1 [Source:HGNC Symbol;Acc:HGNC:26232]	protein_coding
ENSG00000204427	1.0277	3.31012	22.8689	0.000522362	0.00772309	ABHD16A	6	abhydrolase domain containing 16A, phospholipase [Source:HGNC Symbol;Acc:HGNC:13921]	protein_coding
ENSG00000128322	-2.4891	7.47744	22.8446	0.000524547	0.00773191	IGLL1	22	immunoglobulin lambda like polypeptide 1 [Source:HGNC Symbol;Acc:HGNC:5870]	protein_coding
ENSG00000138346	-1.04778	4.69941	22.8433	0.000524671	0.00773191	DNA2	10	DNA replication helicase/nuclease 2 [Source:HGNC Symbol;Acc:HGNC:2939]	protein_coding
ENSG00000156970	-0.959459	6.38072	22.8486	0.000524193	0.00773191	BUB1B	15	BUB1 mitotic checkpoint serine/threonine kinase B [Source:HGNC Symbol;Acc:HGNC:1149]	protein_coding
ENSG00000185760	-1.71289	4.77124	22.8253	0.000526296	0.00774742	KCNQ5	6	potassium voltage-gated channel subfamily Q member 5 [Source:HGNC Symbol;Acc:HGNC:6299]	protein_coding
ENSG00000198752	1.24767	2.98786	22.7901	0.000529486	0.00778592	CDC42BPB	14	CDC42 binding protein kinase beta [Source:HGNC Symbol;Acc:HGNC:1738]	protein_coding
ENSG00000146909	-0.834831	4.42158	22.7483	0.000533316	0.00783373	NOM1	7	nucleolar protein with MIF4G domain 1 [Source:HGNC Symbol;Acc:HGNC:13244]	protein_coding
ENSG00000181894	-1.17105	3.90845	22.6662	0.000540915	0.00793675	ZNF329	19	zinc finger protein 329 [Source:HGNC Symbol;Acc:HGNC:14209]	protein_coding
ENSG00000175348	1.42224	6.57502	22.6512	0.000542318	0.00794872	TMEM9B	11	TMEM9 domain family member B [Source:HGNC Symbol;Acc:HGNC:1168]	protein_coding
ENSG00000100889	-1.1487	5.86001	22.6277	0.000544525	0.00797244	PCK2	14	phosphoenolpyruvate carboxykinase 2, mitochondrial [Source:HGNC Symbol;Acc:HGNC:8725]	protein_coding
ENSG00000106327	-1.36834	6.55784	22.5794	0.000549099	0.00803072	TFR2	7	transferrin receptor 2 [Source:HGNC Symbol;Acc:HGNC:11762]	protein_coding
ENSG00000052802	1.51086	8.6997	22.5152	0.000555244	0.00807699	MSMO1	4	methylsterol monooxygenase 1 [Source:HGNC Symbol;Acc:HGNC:10545]	protein_coding
ENSG00000075702	-2.29046	5.1185	22.5233	0.000554467	0.00807699	WDR62	19	WD repeat domain 62 [Source:HGNC Symbol;Acc:HGNC:24502]	protein_coding
ENSG00000108576	2.99716	1.43631	22.5211	0.000554672	0.00807699	SLC6A4	17	solute carrier family 6 member 4 [Source:HGNC Symbol;Acc:HGNC:11050]	protein_coding
ENSG00000126005	0.856691	3.36066	22.5241	0.000554386	0.00807699	MMP24OS	20	MMP24 opposite strand [Source:HGNC Symbol;Acc:HGNC:44421]	protein_coding
ENSG00000148843	-1.13157	6.00559	22.5368	0.000553171	0.00807699	PDCD11	10	programmed cell death 11 [Source:HGNC Symbol;Acc:HGNC:13408]	protein_coding
ENSG00000090238	1.27382	5.89345	22.4925	0.000557432	0.0081001	YPEL3	16	yippee like 3 [Source:HGNC Symbol;Acc:HGNC:18327]	protein_coding
ENSG00000114631	-2.46822	3.13384	22.4325	0.00056328	0.00817631	PODXL2	3	podocalyxin like 2 [Source:HGNC Symbol;Acc:HGNC:17936]	protein_coding
ENSG00000122965	-0.769106	5.5579	22.4156	0.00056494	0.00819163	RBM19	12	RNA binding motif protein 19 [Source:HGNC Symbol;Acc:HGNC:29098]	protein_coding
ENSG00000100365	1.07077	8.75326	22.4046	0.000566017	0.00819847	NCF4	22	neutrophil cytosolic factor 4 [Source:HGNC Symbol;Acc:HGNC:7662]	protein_coding
ENSG00000168350	-1.51085	2.45435	22.3899	0.000567474	0.00821079	DEGS2	14	delta 4-desaturase, sphingolipid 2 [Source:HGNC Symbol;Acc:HGNC:20113]	protein_coding
ENSG00000181656	2.08833	0.222797	22.3211	0.00057432	0.00830098	GPR88	1	G protein-coupled receptor 88 [Source:HGNC Symbol;Acc:HGNC:4539]	protein_coding
ENSG00000010017	0.817061	5.13697	22.2921	0.000577233	0.00833419	RANBP9	6	RAN binding protein 9 [Source:HGNC Symbol;Acc:HGNC:13727]	protein_coding
ENSG00000005020	0.699663	7.1897	22.2567	0.000580821	0.00834152	SKAP2	7	src kinase associated phosphoprotein 2 [Source:HGNC Symbol;Acc:HGNC:15687]	protein_coding
ENSG00000105072	-1.14661	2.51265	22.2653	0.000579947	0.00834152	C19orf44	19	chromosome 19 open reading frame 44 [Source:HGNC Symbol;Acc:HGNC:26141]	protein_coding
ENSG00000127838	0.724883	7.11762	22.2645	0.000580033	0.00834152	PNKD	2	PNKD metallo-beta-lactamase domain containing [Source:HGNC Symbol;Acc:HGNC:9153]	protein_coding
ENSG00000166483	-1.29244	6.75674	22.2585	0.000580638	0.00834152	WEE1	11	WEE1 G2 checkpoint kinase [Source:HGNC Symbol;Acc:HGNC:12761]	protein_coding
ENSG00000197093	3.0016	-0.154751	22.2607	0.000580415	0.00834152	GAL3ST4	7	galactose-3-O-sulfotransferase 4 [Source:HGNC Symbol;Acc:HGNC:24145]	protein_coding
ENSG00000100399	1.983	1.10755	22.2171	0.000584862	0.00837292	CHADL	22	chondroadherin like [Source:HGNC Symbol;Acc:HGNC:25165]	protein_coding
ENSG00000111186	-2.70083	2.69785	22.2215	0.000584406	0.00837292	WNT5B	12	Wnt family member 5B [Source:HGNC Symbol;Acc:HGNC:16265]	protein_coding
ENSG00000118855	0.951132	8.70041	22.2176	0.000584813	0.00837292	MFSD1	3	major facilitator superfamily domain containing 1 [Source:HGNC Symbol;Acc:HGNC:25874]	protein_coding
ENSG00000107819	1.24731	5.137	22.2031	0.0005863	0.00837659	SFXN3	10	sideroflexin 3 [Source:HGNC Symbol;Acc:HGNC:16087]	protein_coding
ENSG00000164331	1.24606	4.6941	22.1984	0.000586778	0.00837659	ANKRA2	5	ankyrin repeat family A member 2 [Source:HGNC Symbol;Acc:HGNC:13208]	protein_coding
ENSG00000277639	3.29087	-0.428123	22.1965	0.000586974	0.00837659		16	novel protein	protein_coding
ENSG00000185338	1.69286	3.54084	22.1011	0.000596887	0.00850909	SOCS1	16	suppressor of cytokine signaling 1 [Source:HGNC Symbol;Acc:HGNC:19383]	protein_coding
ENSG00000156650	-0.664059	5.69779	22.0753	0.000599604	0.00853885	KAT6B	10	lysine acetyltransferase 6B [Source:HGNC Symbol;Acc:HGNC:17582]	protein_coding
ENSG00000059588	-1.04397	6.08887	22.0172	0.000605767	0.00860894	TARBP1	1	TAR (HIV-1) RNA binding protein 1 [Source:HGNC Symbol;Acc:HGNC:11568]	protein_coding
ENSG00000107771	0.876988	5.15923	22.0169	0.000605798	0.00860894	CCSER2	10	coiled-coil serine rich protein 2 [Source:HGNC Symbol;Acc:HGNC:29197]	protein_coding
ENSG00000077348	-0.994447	5.10858	21.9302	0.000615138	0.00872337	EXOSC5	19	exosome component 5 [Source:HGNC Symbol;Acc:HGNC:24662]	protein_coding
ENSG00000125772	0.784419	5.65816	21.9347	0.000614652	0.00872337	GPCPD1	20	glycerophosphocholine phosphodiesterase 1 [Source:HGNC Symbol;Acc:HGNC:26957]	protein_coding
ENSG00000132436	-1.213	5.61981	21.9225	0.000615978	0.00872615	FIGNL1	7	fidgetin like 1 [Source:HGNC Symbol;Acc:HGNC:13286]	protein_coding
ENSG00000213965	1.0148	4.10909	21.895	0.000618979	0.00875949	NUDT19	19	nudix hydrolase 19 [Source:HGNC Symbol;Acc:HGNC:32036]	protein_coding
ENSG00000198759	2.24273	0.856662	21.8866	0.000619903	0.00876341	EGFL6	X	EGF like domain multiple 6 [Source:HGNC Symbol;Acc:HGNC:3235]	protein_coding
ENSG00000134594	1.11433	5.56028	21.8698	0.000621742	0.0087711	RAB33A	X	RAB33A, member RAS oncogene family [Source:HGNC Symbol;Acc:HGNC:9773]	protein_coding
ENSG00000183726	1.19347	8.10928	21.8721	0.000621499	0.0087711	TMEM50A	1	transmembrane protein 50A [Source:HGNC Symbol;Acc:HGNC:30590]	protein_coding
ENSG00000181638	-1.47354	2.71654	21.8502	0.00062391	0.00879252	ZFP41	8	ZFP41 zinc finger protein [Source:HGNC Symbol;Acc:HGNC:26786]	protein_coding
ENSG00000127586	-2.18453	5.42277	21.8305	0.00062609	0.00881407	CHTF18	16	chromosome transmission fidelity factor 18 [Source:HGNC Symbol;Acc:HGNC:18435]	protein_coding
ENSG00000153707	-2.9616	1.74401	21.7923	0.000630349	0.00885561	PTPRD	9	protein tyrosine phosphatase receptor type D [Source:HGNC Symbol;Acc:HGNC:9668]	protein_coding
ENSG00000169946	2.71611	1.22766	21.795	0.000630045	0.00885561	ZFPM2	8	zinc finger protein, FOG family member 2 [Source:HGNC Symbol;Acc:HGNC:16700]	protein_coding
ENSG00000130810	-1.16033	2.48246	21.7831	0.000631379	0.00886089	PPAN	19	peter pan homolog [Source:HGNC Symbol;Acc:HGNC:9227]	protein_coding
ENSG00000102038	-1.0686	2.78249	21.7581	0.00063419	0.0088737	SMARCA1	X	SWI/SNF related, matrix associated, actin dependent regulator of chromatin, subfamily a, member 1 [Source:HGNC Symbol;Acc:HGNC:11097]	protein_coding
ENSG00000136940	0.627304	5.61814	21.7575	0.000634257	0.0088737	PDCL	9	phosducin like [Source:HGNC Symbol;Acc:HGNC:8770]	protein_coding
ENSG00000142583	-1.67122	5.83915	21.7612	0.000633841	0.0088737	SLC2A5	1	solute carrier family 2 member 5 [Source:HGNC Symbol;Acc:HGNC:11010]	protein_coding
ENSG00000130956	1.49374	2.75048	21.7028	0.000640452	0.00892475	HABP4	9	hyaluronan binding protein 4 [Source:HGNC Symbol;Acc:HGNC:17062]	protein_coding
ENSG00000164292	1.07714	5.92863	21.7077	0.000639895	0.00892475	RHOBTB3	5	Rho related BTB domain containing 3 [Source:HGNC Symbol;Acc:HGNC:18757]	protein_coding
ENSG00000175832	-3.08255	2.15403	21.7115	0.00063947	0.00892475	ETV4	17	ETS variant transcription factor 4 [Source:HGNC Symbol;Acc:HGNC:3493]	protein_coding
ENSG00000213024	-0.688208	6.75336	21.702	0.000640542	0.00892475	NUP62	19	nucleoporin 62 [Source:HGNC Symbol;Acc:HGNC:8066]	protein_coding
ENSG00000155393	-1.12816	4.49916	21.6462	0.000646942	0.00900467	HEATR3	16	HEAT repeat containing 3 [Source:HGNC Symbol;Acc:HGNC:26087]	protein_coding
ENSG00000139531	0.743518	5.17237	21.626	0.000649288	0.00902803	SUOX	12	sulfite oxidase [Source:HGNC Symbol;Acc:HGNC:11460]	protein_coding
ENSG00000147394	1.85946	4.35471	21.6092	0.000651233	0.0090458	ZNF185	X	zinc finger protein 185 with LIM domain [Source:HGNC Symbol;Acc:HGNC:12976]	protein_coding
ENSG00000165526	-0.950638	5.14294	21.5881	0.000653686	0.00907056	RPUSD4	11	RNA pseudouridine synthase D4 [Source:HGNC Symbol;Acc:HGNC:25898]	protein_coding
ENSG00000151835	-1.11612	4.62428	21.5805	0.00065458	0.00907367	SACS	13	sacsin molecular chaperone [Source:HGNC Symbol;Acc:HGNC:10519]	protein_coding
ENSG00000111802	0.763955	5.8419	21.5705	0.000655755	0.00908067	TDP2	6	tyrosyl-DNA phosphodiesterase 2 [Source:HGNC Symbol;Acc:HGNC:17768]	protein_coding
ENSG00000166275	1.60666	4.77427	21.532	0.000660278	0.00913396	BORCS7	10	BLOC-1 related complex subunit 7 [Source:HGNC Symbol;Acc:HGNC:23516]	protein_coding
ENSG00000171735	1.85524	6.43058	21.5197	0.000661733	0.00914475	CAMTA1	1	calmodulin binding transcription activator 1 [Source:HGNC Symbol;Acc:HGNC:18806]	protein_coding
ENSG00000133794	0.869589	3.49609	21.5104	0.000662845	0.00915077	ARNTL	11	aryl hydrocarbon receptor nuclear translocator like [Source:HGNC Symbol;Acc:HGNC:701]	protein_coding
ENSG00000086065	0.983902	6.47587	21.4864	0.000665692	0.00918072	CHMP5	9	charged multivesicular body protein 5 [Source:HGNC Symbol;Acc:HGNC:26942]	protein_coding
ENSG00000076641	0.842196	4.60238	21.4482	0.000670273	0.00923449	PAG1	8	phosphoprotein membrane anchor with glycosphingolipid microdomains 1 [Source:HGNC Symbol;Acc:HGNC:30043]	protein_coding
ENSG00000206053	-1.19807	6.24816	21.4419	0.000671026	0.00923547	JPT2	16	Jupiter microtubule associated homolog 2 [Source:HGNC Symbol;Acc:HGNC:14137]	protein_coding
ENSG00000109756	0.961713	4.88692	21.408	0.000675123	0.00927301	RAPGEF2	4	Rap guanine nucleotide exchange factor 2 [Source:HGNC Symbol;Acc:HGNC:16854]	protein_coding
ENSG00000125968	-1.09488	2.75969	21.4126	0.000674573	0.00927301	ID1	20	inhibitor of DNA binding 1, HLH protein [Source:HGNC Symbol;Acc:HGNC:5360]	protein_coding
ENSG00000164951	0.792827	4.46951	21.3916	0.000677118	0.00929099	PDP1	8	pyruvate dehyrogenase phosphatase catalytic subunit 1 [Source:HGNC Symbol;Acc:HGNC:9279]	protein_coding
ENSG00000197956	1.53798	8.58095	21.3742	0.000679248	0.00931079	S100A6	1	S100 calcium binding protein A6 [Source:HGNC Symbol;Acc:HGNC:10496]	protein_coding
ENSG00000183828	0.919837	4.1083	21.3298	0.0006847	0.00937604	NUDT14	14	nudix hydrolase 14 [Source:HGNC Symbol;Acc:HGNC:20141]	protein_coding
ENSG00000175294	2.28919	3.07509	21.3218	0.000685685	0.00938003	CATSPER1	11	cation channel sperm associated 1 [Source:HGNC Symbol;Acc:HGNC:17116]	protein_coding
ENSG00000175054	-0.824635	5.2349	21.3142	0.000686623	0.00938339	ATR	3	ATR serine/threonine kinase [Source:HGNC Symbol;Acc:HGNC:882]	protein_coding
ENSG00000176928	1.82089	2.15904	21.2946	0.000689046	0.009403	GCNT4	5	glucosaminyl (N-acetyl) transferase 4 [Source:HGNC Symbol;Acc:HGNC:17973]	protein_coding
ENSG00000185862	1.84522	5.43139	21.2914	0.000689447	0.009403	EVI2B	17	ecotropic viral integration site 2B [Source:HGNC Symbol;Acc:HGNC:3500]	protein_coding
ENSG00000172339	-1.05705	3.31363	21.2601	0.000693353	0.00944676	ALG14	1	ALG14 UDP-N-acetylglucosaminyltransferase subunit [Source:HGNC Symbol;Acc:HGNC:28287]	protein_coding
ENSG00000275793	-4.3791	0.667785	21.2291	0.000697246	0.00949025	RIMBP3	22	RIMS binding protein 3 [Source:HGNC Symbol;Acc:HGNC:29344]	protein_coding
ENSG00000089327	0.673218	7.98162	21.211	0.000699534	0.00951183	FXYD5	19	FXYD domain containing ion transport regulator 5 [Source:HGNC Symbol;Acc:HGNC:4029]	protein_coding
ENSG00000159720	1.11879	7.99313	21.201	0.000700799	0.00951948	ATP6V0D1	16	ATPase H+ transporting V0 subunit d1 [Source:HGNC Symbol;Acc:HGNC:13724]	protein_coding
ENSG00000081041	3.41605	4.87568	21.1564	0.00070648	0.00958703	CXCL2	4	C-X-C motif chemokine ligand 2 [Source:HGNC Symbol;Acc:HGNC:4603]	protein_coding
ENSG00000097033	0.608573	7.19821	21.1477	0.000707598	0.0095926	SH3GLB1	1	SH3 domain containing GRB2 like, endophilin B1 [Source:HGNC Symbol;Acc:HGNC:10833]	protein_coding
ENSG00000105369	-1.63331	1.57695	21.0868	0.000715452	0.00967003	CD79A	19	CD79a molecule [Source:HGNC Symbol;Acc:HGNC:1698]	protein_coding
ENSG00000186310	1.28217	3.68669	21.0926	0.000714704	0.00967003	NAP1L3	X	nucleosome assembly protein 1 like 3 [Source:HGNC Symbol;Acc:HGNC:7639]	protein_coding
ENSG00000204386	1.32413	7.0593	21.0879	0.000715307	0.00967003	NEU1	6	neuraminidase 1 [Source:HGNC Symbol;Acc:HGNC:7758]	protein_coding
ENSG00000182718	1.68253	8.18782	21.0773	0.000716692	0.00967713	ANXA2	15	annexin A2 [Source:HGNC Symbol;Acc:HGNC:537]	protein_coding
ENSG00000220205	1.1589	4.7064	21.0658	0.000718185	0.00968763	VAMP2	17	vesicle associated membrane protein 2 [Source:HGNC Symbol;Acc:HGNC:12643]	protein_coding
ENSG00000096060	-0.627562	8.19381	21.0523	0.00071995	0.00969213	FKBP5	6	FKBP prolyl isomerase 5 [Source:HGNC Symbol;Acc:HGNC:3721]	protein_coding
ENSG00000122376	-0.645416	5.67264	21.057	0.000719334	0.00969213	SHLD2	10	shieldin complex subunit 2 [Source:HGNC Symbol;Acc:HGNC:28773]	protein_coding
ENSG00000136490	0.708681	6.84848	21.0355	0.000722151	0.0097121	LIMD2	17	LIM domain containing 2 [Source:HGNC Symbol;Acc:HGNC:28142]	protein_coding
ENSG00000082996	0.854702	6.56981	21.0092	0.000725622	0.00974911	RNF13	3	ring finger protein 13 [Source:HGNC Symbol;Acc:HGNC:10057]	protein_coding
ENSG00000041802	-0.758635	6.01707	20.9642	0.000731597	0.00977652	LSG1	3	large 60S subunit nuclear export GTPase 1 [Source:HGNC Symbol;Acc:HGNC:25652]	protein_coding
ENSG00000076321	0.7507	4.93089	20.9569	0.000732571	0.00977652	KLHL20	1	kelch like family member 20 [Source:HGNC Symbol;Acc:HGNC:25056]	protein_coding
ENSG00000088448	0.661668	7.01636	20.9523	0.000733177	0.00977652	ANKRD10	13	ankyrin repeat domain 10 [Source:HGNC Symbol;Acc:HGNC:20265]	protein_coding
ENSG00000106635	0.904866	6.16001	20.9702	0.000730786	0.00977652	BCL7B	7	BAF chromatin remodeling complex subunit BCL7B [Source:HGNC Symbol;Acc:HGNC:1005]	protein_coding
ENSG00000120256	-2.72052	0.907074	20.9504	0.000733437	0.00977652	LRP11	6	LDL receptor related protein 11 [Source:HGNC Symbol;Acc:HGNC:16936]	protein_coding
ENSG00000151693	1.55536	4.30704	20.9784	0.000729704	0.00977652	ASAP2	2	ArfGAP with SH3 domain, ankyrin repeat and PH domain 2 [Source:HGNC Symbol;Acc:HGNC:2721]	protein_coding
ENSG00000156502	-1.03988	5.52047	20.9716	0.000730601	0.00977652	SUPV3L1	10	Suv3 like RNA helicase [Source:HGNC Symbol;Acc:HGNC:11471]	protein_coding
ENSG00000203879	1.31897	5.43634	20.969	0.000730949	0.00977652	GDI1	X	GDP dissociation inhibitor 1 [Source:HGNC Symbol;Acc:HGNC:4226]	protein_coding
ENSG00000101452	-1.01607	4.18404	20.9232	0.00073709	0.00981554	DHX35	20	DEAH-box helicase 35 [Source:HGNC Symbol;Acc:HGNC:15861]	protein_coding
ENSG00000182782	4.98498	-1.21711	20.9093	0.000738961	0.0098308	HCAR2	12	hydroxycarboxylic acid receptor 2 [Source:HGNC Symbol;Acc:HGNC:24827]	protein_coding
ENSG00000124588	0.651946	6.39616	20.8688	0.000744443	0.00987462	NQO2	6	N-ribosyldihydronicotinamide:quinone reductase 2 [Source:HGNC Symbol;Acc:HGNC:7856]	protein_coding
ENSG00000139410	1.31007	4.22358	20.8692	0.000744395	0.00987462	SDSL	12	serine dehydratase like [Source:HGNC Symbol;Acc:HGNC:30404]	protein_coding
ENSG00000154767	0.961732	6.04617	20.869	0.000744418	0.00987462	XPC	3	XPC complex subunit, DNA damage recognition and repair factor [Source:HGNC Symbol;Acc:HGNC:12816]	protein_coding
ENSG00000049860	1.30821	8.03377	20.8599	0.000745656	0.00988103	HEXB	5	hexosaminidase subunit beta [Source:HGNC Symbol;Acc:HGNC:4879]	protein_coding
ENSG00000127463	-0.679503	6.57539	20.841	0.000748247	0.00990568	EMC1	1	ER membrane protein complex subunit 1 [Source:HGNC Symbol;Acc:HGNC:28957]	protein_coding
ENSG00000129292	0.709992	6.53074	20.8294	0.00074983	0.00990979	PHF20L1	8	PHD finger protein 20 like 1 [Source:HGNC Symbol;Acc:HGNC:24280]	protein_coding
ENSG00000167880	-5.16672	-0.34801	20.8227	0.000750753	0.00990979	EVPL	17	envoplakin [Source:HGNC Symbol;Acc:HGNC:3503]	protein_coding
ENSG00000197380	3.57162	-0.970842	20.8248	0.000750467	0.00990979	DACT3	19	dishevelled binding antagonist of beta catenin 3 [Source:HGNC Symbol;Acc:HGNC:30745]	protein_coding
ENSG00000166166	-1.17413	3.97303	20.8083	0.00075274	0.00992635	TRMT61A	14	tRNA methyltransferase 61A [Source:HGNC Symbol;Acc:HGNC:23790]	protein_coding
ENSG00000108691	3.17255	5.13511	20.7817	0.000756422	0.00996503	CCL2	17	C-C motif chemokine ligand 2 [Source:HGNC Symbol;Acc:HGNC:10618]	protein_coding
ENSG00000196954	0.865597	6.04591	20.7764	0.000757145	0.00996503	CASP4	11	caspase 4 [Source:HGNC Symbol;Acc:HGNC:1505]	protein_coding
ENSG00000087086	2.49315	13.4438	20.7692	0.00075815	0.00996857	FTL	19	ferritin light chain [Source:HGNC Symbol;Acc:HGNC:3999]	protein_coding
ENSG00000115738	1.64001	6.32425	20.7585	0.000759639	0.00997845	ID2	2	inhibitor of DNA binding 2 [Source:HGNC Symbol;Acc:HGNC:5361]	protein_coding
ENSG00000170855	1.13943	6.43162	20.7477	0.000761154	0.00998867	TRIAP1	12	TP53 regulated inhibitor of apoptosis 1 [Source:HGNC Symbol;Acc:HGNC:26937]	protein_coding
ENSG00000149218	1.9346	6.4672	20.6516	0.000774712	0.0101567	ENDOD1	11	endonuclease domain containing 1 [Source:HGNC Symbol;Acc:HGNC:29129]	protein_coding
ENSG00000142224	5.40876	-0.276859	20.6182	0.000779496	0.0101708	IL19	1	interleukin 19 [Source:HGNC Symbol;Acc:HGNC:5990]	protein_coding
ENSG00000149557	2.38539	1.01319	20.6171	0.000779653	0.0101708	FEZ1	11	fasciculation and elongation protein zeta 1 [Source:HGNC Symbol;Acc:HGNC:3659]	protein_coding
ENSG00000150054	1.80831	6.30821	20.6127	0.00078029	0.0101708	MPP7	10	membrane palmitoylated protein 7 [Source:HGNC Symbol;Acc:HGNC:26542]	protein_coding
ENSG00000163823	1.5183	3.9195	20.6384	0.000776601	0.0101708	CCR1	3	C-C motif chemokine receptor 1 [Source:HGNC Symbol;Acc:HGNC:1602]	protein_coding
ENSG00000177733	-1.00068	6.12428	20.6201	0.000779221	0.0101708	HNRNPA0	5	heterogeneous nuclear ribonucleoprotein A0 [Source:HGNC Symbol;Acc:HGNC:5030]	protein_coding
ENSG00000257987	4.90614	-0.0379735	20.6148	0.000779991	0.0101708	TEX49	12	testis expressed 49 [Source:HGNC Symbol;Acc:HGNC:48628]	protein_coding
ENSG00000156509	-1.18265	3.44173	20.5701	0.000786447	0.0102412	FBXO43	8	F-box protein 43 [Source:HGNC Symbol;Acc:HGNC:28521]	protein_coding
ENSG00000067369	-0.682831	6.3874	20.5448	0.000790135	0.0102596	TP53BP1	15	tumor protein p53 binding protein 1 [Source:HGNC Symbol;Acc:HGNC:11999]	protein_coding
ENSG00000071553	0.875994	8.78267	20.5545	0.000788719	0.0102596	ATP6AP1	X	ATPase H+ transporting accessory protein 1 [Source:HGNC Symbol;Acc:HGNC:868]	protein_coding
ENSG00000143797	0.748955	7.03366	20.5474	0.000789754	0.0102596	MBOAT2	2	membrane bound O-acyltransferase domain containing 2 [Source:HGNC Symbol;Acc:HGNC:25193]	protein_coding
ENSG00000123405	0.870865	9.15271	20.5337	0.000791756	0.0102708	NFE2	12	nuclear factor, erythroid 2 [Source:HGNC Symbol;Acc:HGNC:7780]	protein_coding
ENSG00000115145	1.05007	5.05344	20.5238	0.000793201	0.0102797	STAM2	2	signal transducing adaptor molecule 2 [Source:HGNC Symbol;Acc:HGNC:11358]	protein_coding
ENSG00000110080	0.810783	7.66818	20.4974	0.000797098	0.0102908	ST3GAL4	11	ST3 beta-galactoside alpha-2,3-sialyltransferase 4 [Source:HGNC Symbol;Acc:HGNC:10864]	protein_coding
ENSG00000132182	-1.84891	8.11592	20.5033	0.000796217	0.0102908	NUP210	3	nucleoporin 210 [Source:HGNC Symbol;Acc:HGNC:30052]	protein_coding
ENSG00000149582	-1.17794	3.2499	20.5006	0.000796614	0.0102908	TMEM25	11	transmembrane protein 25 [Source:HGNC Symbol;Acc:HGNC:25890]	protein_coding
ENSG00000196072	1.72347	6.71186	20.5038	0.000796147	0.0102908	BLOC1S2	10	biogenesis of lysosomal organelles complex 1 subunit 2 [Source:HGNC Symbol;Acc:HGNC:20984]	protein_coding
ENSG00000111790	0.812287	6.94406	20.4554	0.000803318	0.0103613	FGFR1OP2	12	FGFR1 oncogene partner 2 [Source:HGNC Symbol;Acc:HGNC:23098]	protein_coding
ENSG00000070814	-1.90031	6.44696	20.4492	0.000804239	0.0103633	TCOF1	5	treacle ribosome biogenesis factor 1 [Source:HGNC Symbol;Acc:HGNC:11654]	protein_coding
ENSG00000198700	-0.713765	7.3141	20.4282	0.000807387	0.010394	IPO9	1	importin 9 [Source:HGNC Symbol;Acc:HGNC:19425]	protein_coding
ENSG00000169902	1.50869	5.15914	20.3962	0.000812185	0.0104458	TPST1	7	tyrosylprotein sulfotransferase 1 [Source:HGNC Symbol;Acc:HGNC:12020]	protein_coding
ENSG00000105926	-1.59369	3.5514	20.3741	0.000815527	0.0104536	MPP6	7	membrane palmitoylated protein 6 [Source:HGNC Symbol;Acc:HGNC:18167]	protein_coding
ENSG00000111110	-0.795867	6.30864	20.3813	0.000814436	0.0104536	PPM1H	12	protein phosphatase, Mg2+/Mn2+ dependent 1H [Source:HGNC Symbol;Acc:HGNC:18583]	protein_coding
ENSG00000113013	-0.741906	8.88237	20.3739	0.000815562	0.0104536	HSPA9	5	heat shock protein family A (Hsp70) member 9 [Source:HGNC Symbol;Acc:HGNC:5244]	protein_coding
ENSG00000113645	-3.48557	-0.538772	20.3718	0.000815882	0.0104536	WWC1	5	WW and C2 domain containing 1 [Source:HGNC Symbol;Acc:HGNC:29435]	protein_coding
ENSG00000150347	1.43758	6.14048	20.3581	0.000817966	0.0104704	ARID5B	10	AT-rich interaction domain 5B [Source:HGNC Symbol;Acc:HGNC:17362]	protein_coding
ENSG00000150764	-1.35704	2.54438	20.3448	0.00081998	0.0104863	DIXDC1	11	DIX domain containing 1 [Source:HGNC Symbol;Acc:HGNC:23695]	protein_coding
ENSG00000186193	-1.97056	4.75545	20.336	0.000821325	0.0104936	SAPCD2	9	suppressor APC domain containing 2 [Source:HGNC Symbol;Acc:HGNC:28055]	protein_coding
ENSG00000119242	0.780465	5.3433	20.329	0.000822402	0.0104974	CCDC92	12	coiled-coil domain containing 92 [Source:HGNC Symbol;Acc:HGNC:29563]	protein_coding
ENSG00000130429	1.34474	5.73811	20.2948	0.000827659	0.0105348	ARPC1B	7	actin related protein 2/3 complex subunit 1B [Source:HGNC Symbol;Acc:HGNC:704]	protein_coding
ENSG00000170515	-0.667127	7.51512	20.2958	0.000827501	0.0105348	PA2G4	12	proliferation-associated 2G4 [Source:HGNC Symbol;Acc:HGNC:8550]	protein_coding
ENSG00000197451	-0.9214	7.37163	20.298	0.00082717	0.0105348	HNRNPAB	5	heterogeneous nuclear ribonucleoprotein A/B [Source:HGNC Symbol;Acc:HGNC:5034]	protein_coding
ENSG00000228716	-0.872264	5.59192	20.2871	0.000828852	0.01054	DHFR	5	dihydrofolate reductase [Source:HGNC Symbol;Acc:HGNC:2861]	protein_coding
ENSG00000022277	0.732185	7.07406	20.2696	0.00083155	0.0105569	RTF2	20	replication termination factor 2 [Source:HGNC Symbol;Acc:HGNC:15890]	protein_coding
ENSG00000108960	1.20134	4.6112	20.2584	0.000833294	0.0105569	MMD	17	monocyte to macrophage differentiation associated [Source:HGNC Symbol;Acc:HGNC:7153]	protein_coding
ENSG00000116127	-0.998007	4.15525	20.2613	0.000832846	0.0105569	ALMS1	2	ALMS1 centrosome and basal body associated protein [Source:HGNC Symbol;Acc:HGNC:428]	protein_coding
ENSG00000166261	-0.940815	4.32681	20.2653	0.000832221	0.0105569	ZNF202	11	zinc finger protein 202 [Source:HGNC Symbol;Acc:HGNC:12994]	protein_coding
ENSG00000121897	-0.84437	4.10546	20.2386	0.000836378	0.0105663	LIAS	4	lipoic acid synthetase [Source:HGNC Symbol;Acc:HGNC:16429]	protein_coding
ENSG00000125735	1.40257	2.4964	20.2465	0.000835152	0.0105663	TNFSF14	19	TNF superfamily member 14 [Source:HGNC Symbol;Acc:HGNC:11930]	protein_coding
ENSG00000144554	-1.2499	5.77233	20.2421	0.000835831	0.0105663	FANCD2	3	FA complementation group D2 [Source:HGNC Symbol;Acc:HGNC:3585]	protein_coding
ENSG00000165030	0.911783	5.11836	20.2284	0.000837973	0.0105766	NFIL3	9	nuclear factor, interleukin 3 regulated [Source:HGNC Symbol;Acc:HGNC:7787]	protein_coding
ENSG00000187109	0.745682	8.09056	20.2108	0.000840739	0.0106016	NAP1L1	12	nucleosome assembly protein 1 like 1 [Source:HGNC Symbol;Acc:HGNC:7637]	protein_coding
ENSG00000196787	1.45718	3.38011	20.194	0.000843383	0.0106251	H2AC11	6	H2A clustered histone 11 [Source:HGNC Symbol;Acc:HGNC:4737]	protein_coding
ENSG00000143674	-1.86116	3.19916	20.1836	0.000845014	0.0106258	MAP3K21	1	mitogen-activated protein kinase kinase kinase 21 [Source:HGNC Symbol;Acc:HGNC:29798]	protein_coding
ENSG00000179630	1.46258	4.09797	20.1847	0.000844849	0.0106258	LACC1	13	laccase domain containing 1 [Source:HGNC Symbol;Acc:HGNC:26789]	protein_coding
ENSG00000111846	-0.982727	4.63073	20.1771	0.000846052	0.010629	GCNT2	6	glucosaminyl (N-acetyl) transferase 2 (I blood group) [Source:HGNC Symbol;Acc:HGNC:4204]	protein_coding
ENSG00000139651	-0.986991	3.24556	20.1546	0.000849613	0.0106529	ZNF740	12	zinc finger protein 740 [Source:HGNC Symbol;Acc:HGNC:27465]	protein_coding
ENSG00000160111	1.56233	2.51485	20.1502	0.000850316	0.0106529	CPAMD8	19	C3 and PZP like alpha-2-macroglobulin domain containing 8 [Source:HGNC Symbol;Acc:HGNC:23228]	protein_coding
ENSG00000170043	1.20265	6.72244	20.151	0.000850192	0.0106529	TRAPPC1	17	trafficking protein particle complex 1 [Source:HGNC Symbol;Acc:HGNC:19894]	protein_coding
ENSG00000169679	-0.927516	7.365	20.1214	0.000854927	0.0107008	BUB1	2	BUB1 mitotic checkpoint serine/threonine kinase [Source:HGNC Symbol;Acc:HGNC:1148]	protein_coding
ENSG00000147862	1.6507	5.03971	20.1096	0.000856807	0.0107046	NFIB	9	nuclear factor I B [Source:HGNC Symbol;Acc:HGNC:7785]	protein_coding
ENSG00000183696	1.45192	4.09257	20.1098	0.000856774	0.0107046	UPP1	7	uridine phosphorylase 1 [Source:HGNC Symbol;Acc:HGNC:12576]	protein_coding
ENSG00000036054	0.930029	6.5842	20.0962	0.000858965	0.0107132	TBC1D23	3	TBC1 domain family member 23 [Source:HGNC Symbol;Acc:HGNC:25622]	protein_coding
ENSG00000102760	3.22502	6.61574	20.0955	0.000859084	0.0107132	RGCC	13	regulator of cell cycle [Source:HGNC Symbol;Acc:HGNC:20369]	protein_coding
ENSG00000100629	-1.5445	4.93099	20.0408	0.00086795	0.0107863	CEP128	14	centrosomal protein 128 [Source:HGNC Symbol;Acc:HGNC:20359]	protein_coding
ENSG00000114487	4.16169	-0.106708	20.0455	0.00086719	0.0107863	MORC1	3	MORC family CW-type zinc finger 1 [Source:HGNC Symbol;Acc:HGNC:7198]	protein_coding
ENSG00000138796	-0.934013	6.93119	20.0471	0.000866918	0.0107863	HADH	4	hydroxyacyl-CoA dehydrogenase [Source:HGNC Symbol;Acc:HGNC:4799]	protein_coding
ENSG00000276085	4.32313	-0.830155	23.098	0.000868126	0.0107863	CCL3L3	17	C-C motif chemokine ligand 3 like 3 [Source:HGNC Symbol;Acc:HGNC:30554]	protein_coding
ENSG00000144746	1.78904	8.76143	20.0282	0.00087001	0.0107998	ARL6IP5	3	ADP ribosylation factor like GTPase 6 interacting protein 5 [Source:HGNC Symbol;Acc:HGNC:16937]	protein_coding
ENSG00000103496	0.815881	5.33031	20.0168	0.000871869	0.0108129	STX4	16	syntaxin 4 [Source:HGNC Symbol;Acc:HGNC:11439]	protein_coding
ENSG00000118564	0.908912	6.71195	20.0042	0.000873939	0.0108287	FBXL5	4	F-box and leucine rich repeat protein 5 [Source:HGNC Symbol;Acc:HGNC:13602]	protein_coding
ENSG00000238243	1.16079	3.46493	19.9787	0.000878152	0.010861	OR2W3	1	olfactory receptor family 2 subfamily W member 3 [Source:HGNC Symbol;Acc:HGNC:15021]	protein_coding
ENSG00000273802	2.79922	1.8217	19.9814	0.000877707	0.010861	H2BC8	6	H2B clustered histone 8 [Source:HGNC Symbol;Acc:HGNC:4746]	protein_coding
ENSG00000163743	1.34437	6.11837	19.9546	0.000882146	0.0109005	RCHY1	4	ring finger and CHY zinc finger domain containing 1 [Source:HGNC Symbol;Acc:HGNC:17479]	protein_coding
ENSG00000173473	-0.917431	7.6345	19.9476	0.000883315	0.010905	SMARCC1	3	SWI/SNF related, matrix associated, actin dependent regulator of chromatin subfamily c member 1 [Source:HGNC Symbol;Acc:HGNC:11104]	protein_coding
ENSG00000127947	0.921013	5.03024	19.9304	0.000886177	0.0109303	PTPN12	7	protein tyrosine phosphatase non-receptor type 12 [Source:HGNC Symbol;Acc:HGNC:9645]	protein_coding
ENSG00000134987	-0.927226	6.51922	19.9112	0.000889396	0.01096	WDR36	5	WD repeat domain 36 [Source:HGNC Symbol;Acc:HGNC:30696]	protein_coding
ENSG00000116747	0.834514	7.44915	19.9051	0.000890422	0.0109627	RO60	1	Ro60, Y RNA binding protein [Source:HGNC Symbol;Acc:HGNC:11313]	protein_coding
ENSG00000088325	-0.801751	7.60742	19.8803	0.000894612	0.0109943	TPX2	20	TPX2 microtubule nucleation factor [Source:HGNC Symbol;Acc:HGNC:1249]	protein_coding
ENSG00000142192	-2.04938	6.47351	19.8803	0.000894604	0.0109943	APP	21	amyloid beta precursor protein [Source:HGNC Symbol;Acc:HGNC:620]	protein_coding
ENSG00000175970	-1.00306	4.77524	19.8608	0.000897902	0.0110247	UNC119B	12	unc-119 lipid binding chaperone B [Source:HGNC Symbol;Acc:HGNC:16488]	protein_coding
ENSG00000116254	-6.66567	-1.20296	22.8639	0.000899033	0.0110286	CHD5	1	chromodomain helicase DNA binding protein 5 [Source:HGNC Symbol;Acc:HGNC:16816]	protein_coding
ENSG00000055118	-1.43221	6.96213	19.8346	0.000902377	0.0110596	KCNH2	7	potassium voltage-gated channel subfamily H member 2 [Source:HGNC Symbol;Acc:HGNC:6251]	protein_coding
ENSG00000017483	-1.23131	5.62963	19.8284	0.000903435	0.0110626	SLC38A5	X	solute carrier family 38 member 5 [Source:HGNC Symbol;Acc:HGNC:18070]	protein_coding
ENSG00000009954	-0.791751	6.48948	19.7678	0.000913864	0.0111398	BAZ1B	7	bromodomain adjacent to zinc finger domain 1B [Source:HGNC Symbol;Acc:HGNC:961]	protein_coding
ENSG00000105971	1.57686	4.39791	19.7584	0.000915495	0.0111398	CAV2	7	caveolin 2 [Source:HGNC Symbol;Acc:HGNC:1528]	protein_coding
ENSG00000122862	1.60935	12.7091	19.779	0.000911931	0.0111398	SRGN	10	serglycin [Source:HGNC Symbol;Acc:HGNC:9361]	protein_coding
ENSG00000136003	1.91852	7.336	19.764	0.000914523	0.0111398	ISCU	12	iron-sulfur cluster assembly enzyme [Source:HGNC Symbol;Acc:HGNC:29882]	protein_coding
ENSG00000138363	-0.784871	7.35167	19.7744	0.000912725	0.0111398	ATIC	2	5-aminoimidazole-4-carboxamide ribonucleotide formyltransferase/IMP cyclohydrolase [Source:HGNC Symbol;Acc:HGNC:794]	protein_coding
ENSG00000158856	2.02606	4.87795	19.7626	0.000914764	0.0111398	DMTN	8	dematin actin binding protein [Source:HGNC Symbol;Acc:HGNC:3382]	protein_coding
ENSG00000246705	1.02807	5.19274	19.7732	0.000912923	0.0111398	H2AJ	12	H2A.J histone [Source:HGNC Symbol;Acc:HGNC:14456]	protein_coding
ENSG00000124688	1.84925	6.3973	19.732	0.0009201	0.0111857	MAD2L1BP	6	MAD2L1 binding protein [Source:HGNC Symbol;Acc:HGNC:21059]	protein_coding
ENSG00000115756	0.987951	6.33639	19.7085	0.000924212	0.0112257	HPCAL1	2	hippocalcin like 1 [Source:HGNC Symbol;Acc:HGNC:5145]	protein_coding
ENSG00000073910	0.864947	5.64396	19.6936	0.000926835	0.0112474	FRY	13	FRY microtubule binding protein [Source:HGNC Symbol;Acc:HGNC:20367]	protein_coding
ENSG00000164125	1.37377	3.35119	19.6808	0.000929089	0.0112647	GASK1B	4	golgi associated kinase 1B [Source:HGNC Symbol;Acc:HGNC:25312]	protein_coding
ENSG00000011422	3.01706	6.66499	19.6623	0.000932375	0.0112944	PLAUR	19	plasminogen activator, urokinase receptor [Source:HGNC Symbol;Acc:HGNC:9053]	protein_coding
ENSG00000183605	-0.926225	5.66596	19.6484	0.000934853	0.0113143	SFXN4	10	sideroflexin 4 [Source:HGNC Symbol;Acc:HGNC:16088]	protein_coding
ENSG00000076003	-0.949744	7.74325	19.6214	0.000939671	0.0113523	MCM6	2	minichromosome maintenance complex component 6 [Source:HGNC Symbol;Acc:HGNC:6949]	protein_coding
ENSG00000131844	-0.752908	6.75173	19.6242	0.000939171	0.0113523	MCCC2	5	methylcrotonoyl-CoA carboxylase 2 [Source:HGNC Symbol;Acc:HGNC:6937]	protein_coding
ENSG00000005379	-2.17106	5.15206	19.5813	0.000946885	0.0113844	TSPOAP1	17	TSPO associated protein 1 [Source:HGNC Symbol;Acc:HGNC:16831]	protein_coding
ENSG00000104343	0.665621	5.55018	19.5895	0.0009454	0.0113844	UBE2W	8	ubiquitin conjugating enzyme E2 W [Source:HGNC Symbol;Acc:HGNC:25616]	protein_coding
ENSG00000136732	-0.981265	7.55212	19.5773	0.000947607	0.0113844	GYPC	2	glycophorin C (Gerbich blood group) [Source:HGNC Symbol;Acc:HGNC:4704]	protein_coding
ENSG00000138593	0.771806	4.30906	19.5927	0.000944833	0.0113844	SECISBP2L	15	SECIS binding protein 2 like [Source:HGNC Symbol;Acc:HGNC:28997]	protein_coding
ENSG00000148840	-1.6558	6.2645	19.6011	0.000943311	0.0113844	PPRC1	10	PPARG related coactivator 1 [Source:HGNC Symbol;Acc:HGNC:30025]	protein_coding
ENSG00000170412	2.04363	2.08579	19.5727	0.000948437	0.0113844	GPRC5C	17	G protein-coupled receptor class C group 5 member C [Source:HGNC Symbol;Acc:HGNC:13309]	protein_coding
ENSG00000243244	1.28316	4.85227	19.5693	0.000949048	0.0113844	STON1	2	stonin 1 [Source:HGNC Symbol;Acc:HGNC:17003]	protein_coding
ENSG00000282608	2.18578	1.40104	19.5813	0.000946885	0.0113844	ADORA3	1	adenosine A3 receptor [Source:HGNC Symbol;Acc:HGNC:268]	protein_coding
ENSG00000105993	1.56646	8.09328	19.5367	0.00095499	0.0114455	DNAJB6	7	DnaJ heat shock protein family (Hsp40) member B6 [Source:HGNC Symbol;Acc:HGNC:14888]	protein_coding
ENSG00000136689	2.91885	2.61843	19.5263	0.000956891	0.0114582	IL1RN	2	interleukin 1 receptor antagonist [Source:HGNC Symbol;Acc:HGNC:6000]	protein_coding
ENSG00000125971	0.808624	4.89672	19.5198	0.000958084	0.0114623	DYNLRB1	20	dynein light chain roadblock-type 1 [Source:HGNC Symbol;Acc:HGNC:15468]	protein_coding
ENSG00000063241	-0.840035	5.76257	19.5116	0.000959576	0.01147	ISOC2	19	isochorismatase domain containing 2 [Source:HGNC Symbol;Acc:HGNC:26278]	protein_coding
ENSG00000188243	1.0272	6.85276	19.4999	0.000961728	0.0114856	COMMD6	13	COMM domain containing 6 [Source:HGNC Symbol;Acc:HGNC:24015]	protein_coding
ENSG00000124608	-1.37904	5.00801	19.4854	0.000964414	0.0114974	AARS2	6	alanyl-tRNA synthetase 2, mitochondrial [Source:HGNC Symbol;Acc:HGNC:21022]	protein_coding
ENSG00000197852	1.83164	3.15502	19.4896	0.000963627	0.0114974	INKA2	1	inka box actin regulator 2 [Source:HGNC Symbol;Acc:HGNC:28045]	protein_coding
ENSG00000010803	-1.42868	5.08987	19.4691	0.000967427	0.0115232	SCMH1	1	Scm polycomb group protein homolog 1 [Source:HGNC Symbol;Acc:HGNC:19003]	protein_coding
ENSG00000113649	-0.696215	7.13675	19.4548	0.000970074	0.0115437	TCERG1	5	transcription elongation regulator 1 [Source:HGNC Symbol;Acc:HGNC:15630]	protein_coding
ENSG00000174788	1.97581	-0.652389	19.4506	0.000970854	0.0115437	PCP2	19	Purkinje cell protein 2 [Source:HGNC Symbol;Acc:HGNC:30209]	protein_coding
ENSG00000171033	1.36423	4.82854	19.4402	0.0009728	0.0115466	PKIA	8	cAMP-dependent protein kinase inhibitor alpha [Source:HGNC Symbol;Acc:HGNC:9017]	protein_coding
ENSG00000205339	-0.880345	5.12023	19.4412	0.000972619	0.0115466	IPO7	11	importin 7 [Source:HGNC Symbol;Acc:HGNC:9852]	protein_coding
ENSG00000100106	0.771695	6.05735	19.4327	0.000974207	0.0115531	TRIOBP	22	TRIO and F-actin binding protein [Source:HGNC Symbol;Acc:HGNC:17009]	protein_coding
ENSG00000123836	0.851815	3.93323	19.4239	0.000975845	0.0115624	PFKFB2	1	6-phosphofructo-2-kinase/fructose-2,6-biphosphatase 2 [Source:HGNC Symbol;Acc:HGNC:8873]	protein_coding
ENSG00000256229	-1.84378	3.29385	19.3987	0.000980578	0.0116084	ZNF486	19	zinc finger protein 486 [Source:HGNC Symbol;Acc:HGNC:20807]	protein_coding
ENSG00000197312	-0.795598	4.73411	19.3508	0.00098966	0.0116954	DDI2	1	DNA damage inducible 1 homolog 2 [Source:HGNC Symbol;Acc:HGNC:24578]	protein_coding
ENSG00000197776	1.32237	2.91931	19.3538	0.000989086	0.0116954	KLHDC1	14	kelch domain containing 1 [Source:HGNC Symbol;Acc:HGNC:19836]	protein_coding
ENSG00000048028	-1.36398	4.7807	19.3442	0.000990914	0.0117	USP28	11	ubiquitin specific peptidase 28 [Source:HGNC Symbol;Acc:HGNC:12625]	protein_coding
ENSG00000131355	2.58917	2.54088	19.3198	0.000995573	0.0117448	ADGRE3	19	adhesion G protein-coupled receptor E3 [Source:HGNC Symbol;Acc:HGNC:23647]	protein_coding
ENSG00000151689	0.638618	4.83034	19.3	0.00099939	0.0117765	INPP1	2	inositol polyphosphate-1-phosphatase [Source:HGNC Symbol;Acc:HGNC:6071]	protein_coding
ENSG00000181649	2.44105	2.14606	19.2968	0.000999995	0.0117765	PHLDA2	11	pleckstrin homology like domain family A member 2 [Source:HGNC Symbol;Acc:HGNC:12385]	protein_coding
ENSG00000220201	2.59331	1.82344	19.2594	0.00100724	0.0118514	ZGLP1	19	zinc finger GATA like protein 1 [Source:HGNC Symbol;Acc:HGNC:37245]	protein_coding
ENSG00000140995	1.13178	5.09222	19.2499	0.00100909	0.0118527	DEF8	16	differentially expressed in FDCP 8 homolog [Source:HGNC Symbol;Acc:HGNC:25969]	protein_coding
ENSG00000172009	-0.772174	5.94557	19.2519	0.0010087	0.0118527	THOP1	19	thimet oligopeptidase 1 [Source:HGNC Symbol;Acc:HGNC:11793]	protein_coding
ENSG00000147138	-0.85346	4.30374	19.2371	0.00101158	0.0118716	GPR174	X	G protein-coupled receptor 174 [Source:HGNC Symbol;Acc:HGNC:30245]	protein_coding
ENSG00000173894	-1.34259	4.95502	19.2217	0.00101459	0.0118966	CBX2	17	chromobox 2 [Source:HGNC Symbol;Acc:HGNC:1552]	protein_coding
ENSG00000079482	1.17533	2.6744	19.1967	0.00101951	0.0119337	OPHN1	X	oligophrenin 1 [Source:HGNC Symbol;Acc:HGNC:8148]	protein_coding
ENSG00000143119	0.903472	7.47004	19.2012	0.00101864	0.0119337	CD53	1	CD53 molecule [Source:HGNC Symbol;Acc:HGNC:1686]	protein_coding
ENSG00000137699	-3.35286	0.863445	19.1895	0.00102095	0.0119401	TRIM29	11	tripartite motif containing 29 [Source:HGNC Symbol;Acc:HGNC:17274]	protein_coding
ENSG00000170542	1.22264	5.42093	19.1656	0.00102568	0.0119851	SERPINB9	6	serpin family B member 9 [Source:HGNC Symbol;Acc:HGNC:8955]	protein_coding
ENSG00000141564	-1.27944	4.02685	19.1591	0.00102696	0.0119898	RPTOR	17	regulatory associated protein of MTOR complex 1 [Source:HGNC Symbol;Acc:HGNC:30287]	protein_coding
ENSG00000111653	0.885305	5.92816	19.1099	0.00103681	0.012086	ING4	12	inhibitor of growth family member 4 [Source:HGNC Symbol;Acc:HGNC:19423]	protein_coding
ENSG00000131966	1.02319	6.51422	19.109	0.00103699	0.012086	ACTR10	14	actin related protein 10 [Source:HGNC Symbol;Acc:HGNC:17372]	protein_coding
ENSG00000162367	1.07816	6.04547	19.0851	0.00104182	0.0121319	TAL1	1	TAL bHLH transcription factor 1, erythroid differentiation factor [Source:HGNC Symbol;Acc:HGNC:11556]	protein_coding
ENSG00000123473	-0.773902	5.83489	19.0779	0.00104328	0.0121384	STIL	1	STIL centriolar assembly protein [Source:HGNC Symbol;Acc:HGNC:10879]	protein_coding
ENSG00000109220	0.85853	5.07132	19.0514	0.00104865	0.01218	CHIC2	4	cysteine rich hydrophobic domain 2 [Source:HGNC Symbol;Acc:HGNC:1935]	protein_coding
ENSG00000127804	-1.20655	4.89481	19.0553	0.00104786	0.01218	METTL16	17	methyltransferase like 16 [Source:HGNC Symbol;Acc:HGNC:28484]	protein_coding
ENSG00000077684	-1.21268	6.30688	19.0283	0.00105338	0.0122142	JADE1	4	jade family PHD finger 1 [Source:HGNC Symbol;Acc:HGNC:30027]	protein_coding
ENSG00000109534	-1.17432	5.1247	19.0268	0.00105369	0.0122142	GAR1	4	GAR1 ribonucleoprotein [Source:HGNC Symbol;Acc:HGNC:14264]	protein_coding
ENSG00000144118	1.18805	7.58239	19.0167	0.00105577	0.0122142	RALB	2	RAS like proto-oncogene B [Source:HGNC Symbol;Acc:HGNC:9840]	protein_coding
ENSG00000177225	-1.36492	4.8396	19.0205	0.00105499	0.0122142	GATD1	11	glutamine amidotransferase like class 1 domain containing 1 [Source:HGNC Symbol;Acc:HGNC:26616]	protein_coding
ENSG00000249115	-0.74383	5.33624	19.0106	0.00105701	0.0122142	HAUS5	19	HAUS augmin like complex subunit 5 [Source:HGNC Symbol;Acc:HGNC:29130]	protein_coding
ENSG00000269028	2.55691	0.377101	19.0109	0.00105696	0.0122142	MTRNR2L12	3	MT-RNR2 like 12 [Source:HGNC Symbol;Acc:HGNC:37169]	protein_coding
ENSG00000092201	-0.671106	8.26756	18.9907	0.00106112	0.0122358	SUPT16H	14	SPT16 homolog, facilitates chromatin remodeling subunit [Source:HGNC Symbol;Acc:HGNC:11465]	protein_coding
ENSG00000155561	-1.11969	6.71318	18.9918	0.0010609	0.0122358	NUP205	7	nucleoporin 205 [Source:HGNC Symbol;Acc:HGNC:18658]	protein_coding
ENSG00000171408	-3.49513	-0.264285	18.9877	0.00106173	0.0122358	PDE7B	6	phosphodiesterase 7B [Source:HGNC Symbol;Acc:HGNC:8792]	protein_coding
ENSG00000196670	-1.11607	4.90964	18.9841	0.00106249	0.0122358	ZFP62	5	ZFP62 zinc finger protein [Source:HGNC Symbol;Acc:HGNC:23241]	protein_coding
ENSG00000100439	1.08299	6.51869	18.9667	0.00106609	0.0122429	ABHD4	14	abhydrolase domain containing 4, N-acyl phospholipase B [Source:HGNC Symbol;Acc:HGNC:20154]	protein_coding
ENSG00000101363	0.814522	4.54474	18.9637	0.00106672	0.0122429	MANBAL	20	mannosidase beta like [Source:HGNC Symbol;Acc:HGNC:15799]	protein_coding
ENSG00000109854	1.67563	5.51028	18.971	0.0010652	0.0122429	HTATIP2	11	HIV-1 Tat interactive protein 2 [Source:HGNC Symbol;Acc:HGNC:16637]	protein_coding
ENSG00000136450	-0.924806	6.82524	18.9713	0.00106513	0.0122429	SRSF1	17	serine and arginine rich splicing factor 1 [Source:HGNC Symbol;Acc:HGNC:10780]	protein_coding
ENSG00000110900	3.68698	-0.286789	18.9338	0.00107297	0.0123042	TSPAN11	12	tetraspanin 11 [Source:HGNC Symbol;Acc:HGNC:30795]	protein_coding
ENSG00000085415	-0.791954	6.80811	18.9126	0.00107741	0.0123293	SEH1L	18	SEH1 like nucleoporin [Source:HGNC Symbol;Acc:HGNC:30379]	protein_coding
ENSG00000140284	-0.723126	6.68581	18.9103	0.00107789	0.0123293	SLC27A2	15	solute carrier family 27 member 2 [Source:HGNC Symbol;Acc:HGNC:10996]	protein_coding
ENSG00000167461	0.895893	7.31159	18.9189	0.0010761	0.0123293	RAB8A	19	RAB8A, member RAS oncogene family [Source:HGNC Symbol;Acc:HGNC:7007]	protein_coding
ENSG00000184178	0.982916	5.66877	18.8778	0.00108476	0.0123974	SCFD2	4	sec1 family domain containing 2 [Source:HGNC Symbol;Acc:HGNC:30676]	protein_coding
ENSG00000178057	1.18521	6.81469	18.8694	0.00108655	0.0124073	NDUFAF3	3	NADH:ubiquinone oxidoreductase complex assembly factor 3 [Source:HGNC Symbol;Acc:HGNC:29918]	protein_coding
ENSG00000164938	1.56133	6.64586	18.8527	0.00109011	0.0124376	TP53INP1	8	tumor protein p53 inducible nuclear protein 1 [Source:HGNC Symbol;Acc:HGNC:18022]	protein_coding
ENSG00000157036	-0.756893	4.32114	18.8408	0.00109265	0.012456	EXOG	3	exo/endonuclease G [Source:HGNC Symbol;Acc:HGNC:3347]	protein_coding
ENSG00000128805	-1.27862	4.77185	18.8258	0.00109587	0.0124717	ARHGAP22	10	Rho GTPase activating protein 22 [Source:HGNC Symbol;Acc:HGNC:30320]	protein_coding
ENSG00000146197	-2.12226	0.778418	18.8272	0.00109556	0.0124717	SCUBE3	6	signal peptide, CUB domain and EGF like domain containing 3 [Source:HGNC Symbol;Acc:HGNC:13655]	protein_coding
ENSG00000163121	5.32804	-0.699225	18.8169	0.00109779	0.0124831	NEURL3	2	neuralized E3 ubiquitin protein ligase 3 [Source:HGNC Symbol;Acc:HGNC:25162]	protein_coding
ENSG00000112699	-0.75987	5.02943	18.7863	0.00110439	0.0125413	GMDS	6	GDP-mannose 4,6-dehydratase [Source:HGNC Symbol;Acc:HGNC:4369]	protein_coding
ENSG00000123342	2.92866	1.77499	18.7846	0.00110476	0.0125413	MMP19	12	matrix metallopeptidase 19 [Source:HGNC Symbol;Acc:HGNC:7165]	protein_coding
ENSG00000142089	1.14276	7.92656	18.742	0.00111404	0.012636	IFITM3	11	interferon induced transmembrane protein 3 [Source:HGNC Symbol;Acc:HGNC:5414]	protein_coding
ENSG00000153574	-0.772322	6.07299	18.7035	0.00112251	0.0127048	RPIA	2	ribose 5-phosphate isomerase A [Source:HGNC Symbol;Acc:HGNC:10297]	protein_coding
ENSG00000167261	0.943399	4.87435	18.7099	0.00112109	0.0127048	DPEP2	16	dipeptidase 2 [Source:HGNC Symbol;Acc:HGNC:23028]	protein_coding
ENSG00000168872	-0.865337	4.41801	18.7017	0.00112292	0.0127048	DDX19A	16	DEAD-box helicase 19A [Source:HGNC Symbol;Acc:HGNC:25628]	protein_coding
ENSG00000163659	1.19497	4.66209	18.6947	0.00112445	0.0127116	TIPARP	3	TCDD inducible poly(ADP-ribose) polymerase [Source:HGNC Symbol;Acc:HGNC:23696]	protein_coding
ENSG00000180190	2.87187	0.674988	18.6702	0.0011299	0.0127625	TDRP	8	testis development related protein [Source:HGNC Symbol;Acc:HGNC:26951]	protein_coding
ENSG00000161996	-1.97863	4.71085	18.6566	0.00113293	0.0127861	WDR90	16	WD repeat domain 90 [Source:HGNC Symbol;Acc:HGNC:26960]	protein_coding
ENSG00000100632	-1.13216	6.56898	18.6372	0.00113727	0.0128244	ERH	14	ERH mRNA splicing and mitosis factor [Source:HGNC Symbol;Acc:HGNC:3447]	protein_coding
ENSG00000110852	1.07352	5.49234	18.6281	0.00113932	0.0128368	CLEC2B	12	C-type lectin domain family 2 member B [Source:HGNC Symbol;Acc:HGNC:2053]	protein_coding
ENSG00000169683	-1.1668	3.96718	18.6201	0.00114112	0.0128463	LRRC45	17	leucine rich repeat containing 45 [Source:HGNC Symbol;Acc:HGNC:28302]	protein_coding
ENSG00000105443	0.767129	5.88894	18.5778	0.00115068	0.0129325	CYTH2	19	cytohesin 2 [Source:HGNC Symbol;Acc:HGNC:9502]	protein_coding
ENSG00000205639	1.65754	4.76257	18.5813	0.00114989	0.0129325	MFSD2B	2	major facilitator superfamily domain containing 2B [Source:HGNC Symbol;Acc:HGNC:37207]	protein_coding
ENSG00000056558	2.39123	1.49884	18.534	0.00116072	0.0130189	TRAF1	9	TNF receptor associated factor 1 [Source:HGNC Symbol;Acc:HGNC:12031]	protein_coding
ENSG00000106009	-1.46554	6.15918	18.5316	0.00116125	0.0130189	BRAT1	7	BRCA1 associated ATM activator 1 [Source:HGNC Symbol;Acc:HGNC:21701]	protein_coding
ENSG00000108947	-5.80183	-1.24309	21.2068	0.00116083	0.0130189	EFNB3	17	ephrin B3 [Source:HGNC Symbol;Acc:HGNC:3228]	protein_coding
ENSG00000127616	-0.950942	7.09028	18.5181	0.00116437	0.0130431	SMARCA4	19	SWI/SNF related, matrix associated, actin dependent regulator of chromatin, subfamily a, member 4 [Source:HGNC Symbol;Acc:HGNC:11100]	protein_coding
ENSG00000141401	-0.644226	5.98384	18.5068	0.00116698	0.0130615	IMPA2	18	inositol monophosphatase 2 [Source:HGNC Symbol;Acc:HGNC:6051]	protein_coding
ENSG00000186185	-1.4767	4.57474	18.4964	0.00116938	0.0130775	KIF18B	17	kinesin family member 18B [Source:HGNC Symbol;Acc:HGNC:27102]	protein_coding
ENSG00000112335	1.22698	8.50202	18.4839	0.00117229	0.0130993	SNX3	6	sorting nexin 3 [Source:HGNC Symbol;Acc:HGNC:11174]	protein_coding
ENSG00000115275	-1.28136	6.94273	18.4775	0.00117379	0.0131052	MOGS	2	mannosyl-oligosaccharide glucosidase [Source:HGNC Symbol;Acc:HGNC:24862]	protein_coding
ENSG00000058600	-0.748402	5.29269	18.469	0.00117575	0.0131094	POLR3E	16	RNA polymerase III subunit E [Source:HGNC Symbol;Acc:HGNC:30347]	protein_coding
ENSG00000113368	-2.2334	6.9682	18.4664	0.00117637	0.0131094	LMNB1	5	lamin B1 [Source:HGNC Symbol;Acc:HGNC:6637]	protein_coding
ENSG00000120658	-4.01071	-0.0106088	18.4512	0.00117993	0.0131094	ENOX1	13	ecto-NOX disulfide-thiol exchanger 1 [Source:HGNC Symbol;Acc:HGNC:25474]	protein_coding
ENSG00000125868	0.695604	7.66096	18.4558	0.00117886	0.0131094	DSTN	20	destrin, actin depolymerizing factor [Source:HGNC Symbol;Acc:HGNC:15750]	protein_coding
ENSG00000178033	3.55527	1.16747	18.4541	0.00117925	0.0131094	CALHM5	6	calcium homeostasis modulator family member 5 [Source:HGNC Symbol;Acc:HGNC:21568]	protein_coding
ENSG00000188610	-0.921444	3.23302	18.451	0.00117997	0.0131094	FAM72B	1	family with sequence similarity 72 member B [Source:HGNC Symbol;Acc:HGNC:24805]	protein_coding
ENSG00000103502	0.599724	6.33893	18.4436	0.0011817	0.0131179	CDIPT	16	CDP-diacylglycerol--inositol 3-phosphatidyltransferase [Source:HGNC Symbol;Acc:HGNC:1769]	protein_coding
ENSG00000106809	-2.43191	2.03707	18.434	0.00118397	0.0131323	OGN	9	osteoglycin [Source:HGNC Symbol;Acc:HGNC:8126]	protein_coding
ENSG00000173040	-1.56047	2.41843	18.4278	0.00118542	0.0131376	EVC2	4	EvC ciliary complex subunit 2 [Source:HGNC Symbol;Acc:HGNC:19747]	protein_coding
ENSG00000104375	0.692064	5.18934	18.4215	0.00118691	0.0131434	STK3	8	serine/threonine kinase 3 [Source:HGNC Symbol;Acc:HGNC:11406]	protein_coding
ENSG00000156968	-1.52255	3.62212	18.408	0.0011901	0.0131679	MPV17L	16	MPV17 mitochondrial inner membrane protein like [Source:HGNC Symbol;Acc:HGNC:26827]	protein_coding
ENSG00000134986	-0.874858	4.60957	18.3896	0.00119447	0.0132055	NREP	5	neuronal regeneration related protein [Source:HGNC Symbol;Acc:HGNC:16834]	protein_coding
ENSG00000078018	3.0021	0.0975304	18.3746	0.00119802	0.013234	MAP2	2	microtubule associated protein 2 [Source:HGNC Symbol;Acc:HGNC:6839]	protein_coding
ENSG00000196083	0.946253	5.30181	18.3669	0.00119987	0.0132435	IL1RAP	3	interleukin 1 receptor accessory protein [Source:HGNC Symbol;Acc:HGNC:5995]	protein_coding
ENSG00000101096	-1.66148	4.89776	18.3547	0.0012028	0.0132651	NFATC2	20	nuclear factor of activated T cells 2 [Source:HGNC Symbol;Acc:HGNC:7776]	protein_coding
ENSG00000138658	-1.18103	4.90479	18.3465	0.00120476	0.0132759	ZGRF1	4	zinc finger GRF-type containing 1 [Source:HGNC Symbol;Acc:HGNC:25654]	protein_coding
ENSG00000179431	-3.47168	-0.393187	18.2997	0.00121607	0.0133896	FJX1	11	four-jointed box kinase 1 [Source:HGNC Symbol;Acc:HGNC:17166]	protein_coding
ENSG00000157680	3.40382	2.79485	18.2909	0.00121819	0.0134021	DGKI	7	diacylglycerol kinase iota [Source:HGNC Symbol;Acc:HGNC:2855]	protein_coding
ENSG00000188883	-6.12738	-0.943694	20.8911	0.00122075	0.0134193	KLRG2	7	killer cell lectin like receptor G2 [Source:HGNC Symbol;Acc:HGNC:24778]	protein_coding
ENSG00000148516	-0.859984	4.32517	18.2732	0.00122251	0.0134278	ZEB1	10	zinc finger E-box binding homeobox 1 [Source:HGNC Symbol;Acc:HGNC:11642]	protein_coding
ENSG00000107968	1.17926	5.6016	18.2565	0.0012266	0.0134618	MAP3K8	10	mitogen-activated protein kinase kinase kinase 8 [Source:HGNC Symbol;Acc:HGNC:6860]	protein_coding
ENSG00000138092	-0.779936	4.31667	18.2397	0.00123073	0.013466	CENPO	2	centromere protein O [Source:HGNC Symbol;Acc:HGNC:28152]	protein_coding
ENSG00000162571	1.7517	0.666586	18.2445	0.00122955	0.013466	TTLL10	1	tubulin tyrosine ligase like 10 [Source:HGNC Symbol;Acc:HGNC:26693]	protein_coding
ENSG00000164627	-4.64078	-0.974817	18.2448	0.00122948	0.013466	KIF6	6	kinesin family member 6 [Source:HGNC Symbol;Acc:HGNC:21202]	protein_coding
ENSG00000244482	2.18415	0.506931	18.2388	0.00123096	0.013466	LILRA6	19	leukocyte immunoglobulin like receptor A6 [Source:HGNC Symbol;Acc:HGNC:15495]	protein_coding
ENSG00000145349	2.60001	0.695026	18.2222	0.00123504	0.0134967	CAMK2D	4	calcium/calmodulin dependent protein kinase II delta [Source:HGNC Symbol;Acc:HGNC:1462]	protein_coding
ENSG00000271605	1.67274	4.38545	18.2193	0.00123576	0.0134967	MILR1	17	mast cell immunoglobulin like receptor 1 [Source:HGNC Symbol;Acc:HGNC:27570]	protein_coding
ENSG00000196459	1.11553	5.24247	18.2112	0.00123779	0.0135079	TRAPPC2	X	trafficking protein particle complex 2 [Source:HGNC Symbol;Acc:HGNC:23068]	protein_coding
ENSG00000072682	2.14339	1.97737	18.1672	0.00124874	0.0136165	P4HA2	5	prolyl 4-hydroxylase subunit alpha 2 [Source:HGNC Symbol;Acc:HGNC:8547]	protein_coding
ENSG00000089693	0.556749	7.52236	18.149	0.00125331	0.0136295	MLF2	12	myeloid leukemia factor 2 [Source:HGNC Symbol;Acc:HGNC:7126]	protein_coding
ENSG00000100319	1.63605	5.42371	18.1521	0.00125254	0.0136295	ZMAT5	22	zinc finger matrin-type 5 [Source:HGNC Symbol;Acc:HGNC:28046]	protein_coding
ENSG00000128641	-3.6174	2.00664	18.1424	0.00125496	0.0136295	MYO1B	2	myosin IB [Source:HGNC Symbol;Acc:HGNC:7596]	protein_coding
ENSG00000174371	-1.00705	5.6394	18.1518	0.00125261	0.0136295	EXO1	1	exonuclease 1 [Source:HGNC Symbol;Acc:HGNC:3511]	protein_coding
ENSG00000196220	-1.78419	3.90643	18.1458	0.00125411	0.0136295	SRGAP3	3	SLIT-ROBO Rho GTPase activating protein 3 [Source:HGNC Symbol;Acc:HGNC:19744]	protein_coding
ENSG00000135913	-0.920366	5.37287	18.1147	0.00126199	0.0136948	USP37	2	ubiquitin specific peptidase 37 [Source:HGNC Symbol;Acc:HGNC:20063]	protein_coding
ENSG00000135452	1.58602	5.72902	18.1024	0.00126511	0.0137177	TSPAN31	12	tetraspanin 31 [Source:HGNC Symbol;Acc:HGNC:10539]	protein_coding
ENSG00000101367	0.936728	7.6192	18.0814	0.00127045	0.0137645	MAPRE1	20	microtubule associated protein RP/EB family member 1 [Source:HGNC Symbol;Acc:HGNC:6890]	protein_coding
ENSG00000140030	1.03238	5.23796	18.058	0.00127645	0.0138185	GPR65	14	G protein-coupled receptor 65 [Source:HGNC Symbol;Acc:HGNC:4517]	protein_coding
ENSG00000133943	-0.873967	6.54947	18.0472	0.00127924	0.0138377	DGLUCY	14	D-glutamate cyclase [Source:HGNC Symbol;Acc:HGNC:20498]	protein_coding
ENSG00000099810	-0.705144	5.51238	18.0372	0.00128181	0.0138544	MTAP	9	methylthioadenosine phosphorylase [Source:HGNC Symbol;Acc:HGNC:7413]	protein_coding
ENSG00000102780	1.40204	2.42488	18.0292	0.00128389	0.0138658	DGKH	13	diacylglycerol kinase eta [Source:HGNC Symbol;Acc:HGNC:2854]	protein_coding
ENSG00000165733	-0.629488	6.48312	18.0199	0.00128629	0.0138807	BMS1	10	BMS1 ribosome biogenesis factor [Source:HGNC Symbol;Acc:HGNC:23505]	protein_coding
ENSG00000144647	-1.74672	4.76049	18.0157	0.00128738	0.0138813	POMGNT2	3	protein O-linked mannose N-acetylglucosaminyltransferase 2 (beta 1,4-) [Source:HGNC Symbol;Acc:HGNC:25902]	protein_coding
ENSG00000136560	1.15925	6.47533	18.0107	0.00128869	0.0138844	TANK	2	TRAF family member associated NFKB activator [Source:HGNC Symbol;Acc:HGNC:11562]	protein_coding
ENSG00000084774	-2.54364	6.43624	18.0022	0.0012909	0.0138972	CAD	2	carbamoyl-phosphate synthetase 2, aspartate transcarbamylase, and dihydroorotase [Source:HGNC Symbol;Acc:HGNC:1424]	protein_coding
ENSG00000175895	0.787237	6.60042	17.991	0.00129382	0.0139176	PLEKHF2	8	pleckstrin homology and FYVE domain containing 2 [Source:HGNC Symbol;Acc:HGNC:20757]	protein_coding
ENSG00000158321	-1.63033	3.57685	17.9747	0.00129808	0.0139192	AUTS2	7	activator of transcription and developmental regulator AUTS2 [Source:HGNC Symbol;Acc:HGNC:14262]	protein_coding
ENSG00000163947	1.74249	6.19835	17.9818	0.00129623	0.0139192	ARHGEF3	3	Rho guanine nucleotide exchange factor 3 [Source:HGNC Symbol;Acc:HGNC:683]	protein_coding
ENSG00000175489	2.29365	2.81181	17.9748	0.00129806	0.0139192	LRRC25	19	leucine rich repeat containing 25 [Source:HGNC Symbol;Acc:HGNC:29806]	protein_coding
ENSG00000196503	-3.08885	-0.490629	17.9806	0.00129654	0.0139192	ARL9	4	ADP ribosylation factor like GTPase 9 [Source:HGNC Symbol;Acc:HGNC:23592]	protein_coding
ENSG00000129951	-2.32935	4.45662	17.9684	0.00129974	0.0139259	PLPPR3	19	phospholipid phosphatase related 3 [Source:HGNC Symbol;Acc:HGNC:23497]	protein_coding
ENSG00000151327	1.57403	5.7006	17.9479	0.00130513	0.0139726	FAM177A1	14	family with sequence similarity 177 member A1 [Source:HGNC Symbol;Acc:HGNC:19829]	protein_coding
ENSG00000167468	0.617776	8.345	17.94	0.00130721	0.0139839	GPX4	19	glutathione peroxidase 4 [Source:HGNC Symbol;Acc:HGNC:4556]	protein_coding
ENSG00000184979	1.89439	2.85889	17.8955	0.00131905	0.0140994	USP18	22	ubiquitin specific peptidase 18 [Source:HGNC Symbol;Acc:HGNC:12616]	protein_coding
ENSG00000168916	-1.55819	2.10439	17.8863	0.00132152	0.0141146	ZNF608	5	zinc finger protein 608 [Source:HGNC Symbol;Acc:HGNC:29238]	protein_coding
ENSG00000185432	1.40984	6.89558	17.8794	0.00132336	0.0141232	METTL7A	12	methyltransferase like 7A [Source:HGNC Symbol;Acc:HGNC:24550]	protein_coding
ENSG00000163636	1.29243	7.57302	17.8631	0.00132774	0.0141587	PSMD6	3	proteasome 26S subunit, non-ATPase 6 [Source:HGNC Symbol;Acc:HGNC:9564]	protein_coding
ENSG00000121057	-1.40588	5.74622	17.8518	0.0013308	0.0141719	AKAP1	17	A-kinase anchoring protein 1 [Source:HGNC Symbol;Acc:HGNC:367]	protein_coding
ENSG00000173614	0.819925	4.43041	17.8508	0.00133107	0.0141719	NMNAT1	1	nicotinamide nucleotide adenylyltransferase 1 [Source:HGNC Symbol;Acc:HGNC:17877]	protein_coding
ENSG00000067248	0.855603	6.23258	17.8433	0.00133309	0.0141823	DHX29	5	DExH-box helicase 29 [Source:HGNC Symbol;Acc:HGNC:15815]	protein_coding
ENSG00000041515	-6.97973	0.0531214	20.2897	0.00134567	0.0143033	MYO16	13	myosin XVI [Source:HGNC Symbol;Acc:HGNC:29822]	protein_coding
ENSG00000089199	-5.92929	-1.29182	20.2827	0.00134721	0.0143033	CHGB	20	chromogranin B [Source:HGNC Symbol;Acc:HGNC:1930]	protein_coding
ENSG00000126264	0.753124	5.93103	17.7899	0.00134763	0.0143033	HCST	19	hematopoietic cell signal transducer [Source:HGNC Symbol;Acc:HGNC:16977]	protein_coding
ENSG00000005156	-1.05667	5.56993	17.7658	0.00135425	0.014344	LIG3	17	DNA ligase 3 [Source:HGNC Symbol;Acc:HGNC:6600]	protein_coding
ENSG00000023171	-1.04935	3.47082	17.7671	0.00135389	0.014344	GRAMD1B	11	GRAM domain containing 1B [Source:HGNC Symbol;Acc:HGNC:29214]	protein_coding
ENSG00000141101	-1.10738	5.31231	17.7575	0.00135656	0.014344	NOB1	16	NIN1 (RPN12) binding protein 1 homolog [Source:HGNC Symbol;Acc:HGNC:29540]	protein_coding
ENSG00000160948	0.621711	6.67575	17.7603	0.00135577	0.014344	VPS28	8	VPS28 subunit of ESCRT-I [Source:HGNC Symbol;Acc:HGNC:18178]	protein_coding
ENSG00000235750	-1.60987	4.3134	17.7567	0.00135677	0.014344	KIAA0040	1	KIAA0040 [Source:HGNC Symbol;Acc:HGNC:28950]	protein_coding
ENSG00000067704	-0.809693	6.98373	17.7394	0.00136155	0.014361	IARS2	1	isoleucyl-tRNA synthetase 2, mitochondrial [Source:HGNC Symbol;Acc:HGNC:29685]	protein_coding
ENSG00000141753	-2.45605	1.83793	17.7408	0.00136116	0.014361	IGFBP4	17	insulin like growth factor binding protein 4 [Source:HGNC Symbol;Acc:HGNC:5473]	protein_coding
ENSG00000196776	1.25086	8.6198	17.7412	0.00136107	0.014361	CD47	3	CD47 molecule [Source:HGNC Symbol;Acc:HGNC:1682]	protein_coding
ENSG00000284753	-1.08693	3.28949	17.7178	0.00136758	0.0144134	EEF1AKMT4	3	EEF1A lysine methyltransferase 4 [Source:HGNC Symbol;Acc:HGNC:53611]	protein_coding
ENSG00000172725	0.835928	5.88242	17.7101	0.00136974	0.0144248	CORO1B	11	coronin 1B [Source:HGNC Symbol;Acc:HGNC:2253]	protein_coding
ENSG00000166503	0.752648	5.6946	17.6957	0.00137375	0.0144559	HDGFL3	15	HDGF like 3 [Source:HGNC Symbol;Acc:HGNC:24937]	protein_coding
ENSG00000110583	-1.05805	5.70224	17.6753	0.00137949	0.0144825	NAA40	11	N-alpha-acetyltransferase 40, NatD catalytic subunit [Source:HGNC Symbol;Acc:HGNC:25845]	protein_coding
ENSG00000159958	-3.00955	-0.54473	17.6772	0.00137895	0.0144825	TNFRSF13C	22	TNF receptor superfamily member 13C [Source:HGNC Symbol;Acc:HGNC:17755]	protein_coding
ENSG00000175482	0.95259	3.59618	17.6788	0.00137851	0.0144825	POLD4	11	DNA polymerase delta 4, accessory subunit [Source:HGNC Symbol;Acc:HGNC:14106]	protein_coding
ENSG00000068903	1.41094	6.16716	17.6414	0.00138909	0.014527	SIRT2	19	sirtuin 2 [Source:HGNC Symbol;Acc:HGNC:10886]	protein_coding
ENSG00000107863	1.38684	5.17483	17.6521	0.00138603	0.014527	ARHGAP21	10	Rho GTPase activating protein 21 [Source:HGNC Symbol;Acc:HGNC:23725]	protein_coding
ENSG00000118193	-0.728166	5.45626	17.6454	0.00138793	0.014527	KIF14	1	kinesin family member 14 [Source:HGNC Symbol;Acc:HGNC:19181]	protein_coding
ENSG00000188056	2.18451	0.628432	17.653	0.00138579	0.014527	TREML4	6	triggering receptor expressed on myeloid cells like 4 [Source:HGNC Symbol;Acc:HGNC:30807]	protein_coding
ENSG00000222009	1.48739	2.11599	17.6418	0.00138897	0.014527	BTBD19	1	BTB domain containing 19 [Source:HGNC Symbol;Acc:HGNC:27145]	protein_coding
ENSG00000016864	1.57104	7.33534	17.6363	0.00139052	0.0145308	GLT8D1	3	glycosyltransferase 8 domain containing 1 [Source:HGNC Symbol;Acc:HGNC:24870]	protein_coding
ENSG00000110330	0.604989	6.12342	17.6224	0.00139448	0.0145608	BIRC2	11	baculoviral IAP repeat containing 2 [Source:HGNC Symbol;Acc:HGNC:590]	protein_coding
ENSG00000153071	2.15265	6.15505	17.6145	0.00139676	0.0145734	DAB2	5	DAB adaptor protein 2 [Source:HGNC Symbol;Acc:HGNC:2662]	protein_coding
ENSG00000103275	-0.554894	7.2168	17.5792	0.00140687	0.0146324	UBE2I	16	ubiquitin conjugating enzyme E2 I [Source:HGNC Symbol;Acc:HGNC:12485]	protein_coding
ENSG00000108592	-1.05003	6.15551	17.5604	0.0014123	0.0146324	FTSJ3	17	FtsJ RNA 2'-O-methyltransferase 3 [Source:HGNC Symbol;Acc:HGNC:17136]	protein_coding
ENSG00000124207	-0.688518	7.85473	17.5868	0.0014047	0.0146324	CSE1L	20	chromosome segregation 1 like [Source:HGNC Symbol;Acc:HGNC:2431]	protein_coding
ENSG00000125869	3.54575	0.50794	17.5476	0.00141603	0.0146324	LAMP5	20	lysosomal associated membrane protein family member 5 [Source:HGNC Symbol;Acc:HGNC:16097]	protein_coding
ENSG00000130299	-0.819007	4.19386	17.5499	0.00141536	0.0146324	GTPBP3	19	GTP binding protein 3, mitochondrial [Source:HGNC Symbol;Acc:HGNC:14880]	protein_coding
ENSG00000132329	4.00958	4.66954	17.5499	0.00141536	0.0146324	RAMP1	2	receptor activity modifying protein 1 [Source:HGNC Symbol;Acc:HGNC:9843]	protein_coding
ENSG00000136383	-4.45483	-1.3087	17.5495	0.00141548	0.0146324	ALPK3	15	alpha kinase 3 [Source:HGNC Symbol;Acc:HGNC:17574]	protein_coding
ENSG00000143627	-3.57316	2.99347	17.5769	0.00140755	0.0146324	PKLR	1	pyruvate kinase L/R [Source:HGNC Symbol;Acc:HGNC:9020]	protein_coding
ENSG00000177576	1.6479	3.37805	17.5424	0.00141754	0.0146324	C18orf32	18	chromosome 18 open reading frame 32 [Source:HGNC Symbol;Acc:HGNC:31690]	protein_coding
ENSG00000184497	2.20618	1.37682	17.569	0.00140983	0.0146324	TMEM255B	13	transmembrane protein 255B [Source:HGNC Symbol;Acc:HGNC:28297]	protein_coding
ENSG00000184967	-0.617246	5.13117	17.5709	0.00140928	0.0146324	NOC4L	12	nucleolar complex associated 4 homolog [Source:HGNC Symbol;Acc:HGNC:28461]	protein_coding
ENSG00000213020	-1.33214	4.76142	17.5427	0.00141745	0.0146324	ZNF611	19	zinc finger protein 611 [Source:HGNC Symbol;Acc:HGNC:28766]	protein_coding
ENSG00000221926	0.996168	4.54603	17.5425	0.00141751	0.0146324	TRIM16	17	tripartite motif containing 16 [Source:HGNC Symbol;Acc:HGNC:17241]	protein_coding
ENSG00000237765	1.22001	4.91782	17.5576	0.00141313	0.0146324	FAM200B	4	family with sequence similarity 200 member B [Source:HGNC Symbol;Acc:HGNC:27740]	protein_coding
ENSG00000175582	0.643646	7.3714	17.5348	0.00141976	0.0146442	RAB6A	11	RAB6A, member RAS oncogene family [Source:HGNC Symbol;Acc:HGNC:9786]	protein_coding
ENSG00000171657	3.18357	0.300697	17.5298	0.00142122	0.0146481	GPR82	X	G protein-coupled receptor 82 [Source:HGNC Symbol;Acc:HGNC:4533]	protein_coding
ENSG00000076555	-1.32657	3.13305	17.5109	0.00142674	0.0146826	ACACB	12	acetyl-CoA carboxylase beta [Source:HGNC Symbol;Acc:HGNC:85]	protein_coding
ENSG00000104369	2.02252	1.06094	17.5124	0.00142631	0.0146826	JPH1	8	junctophilin 1 [Source:HGNC Symbol;Acc:HGNC:14201]	protein_coding
ENSG00000154914	-1.72584	1.68802	17.498	0.00143052	0.0147104	USP43	17	ubiquitin specific peptidase 43 [Source:HGNC Symbol;Acc:HGNC:20072]	protein_coding
ENSG00000196628	-0.586937	5.881	17.4921	0.00143227	0.0147171	TCF4	18	transcription factor 4 [Source:HGNC Symbol;Acc:HGNC:11634]	protein_coding
ENSG00000132975	-2.7625	1.3407	17.4298	0.00145075	0.0148732	GPR12	13	G protein-coupled receptor 12 [Source:HGNC Symbol;Acc:HGNC:4466]	protein_coding
ENSG00000141682	1.34762	4.87233	17.4303	0.00145061	0.0148732	PMAIP1	18	phorbol-12-myristate-13-acetate-induced protein 1 [Source:HGNC Symbol;Acc:HGNC:9108]	protein_coding
ENSG00000166889	-0.980309	4.37661	17.4358	0.00144896	0.0148732	PATL1	11	PAT1 homolog 1, processing body mRNA decay factor [Source:HGNC Symbol;Acc:HGNC:26721]	protein_coding
ENSG00000125733	1.34501	4.22562	17.4211	0.00145337	0.0148805	TRIP10	19	thyroid hormone receptor interactor 10 [Source:HGNC Symbol;Acc:HGNC:12304]	protein_coding
ENSG00000137494	0.852515	3.78337	17.4164	0.00145476	0.0148805	ANKRD42	11	ankyrin repeat domain 42 [Source:HGNC Symbol;Acc:HGNC:26752]	protein_coding
ENSG00000163751	1.28607	10.3356	17.4197	0.00145377	0.0148805	CPA3	3	carboxypeptidase A3 [Source:HGNC Symbol;Acc:HGNC:2298]	protein_coding
ENSG00000075218	-0.94589	5.25018	17.4079	0.00145733	0.0148955	GTSE1	22	G2 and S-phase expressed 1 [Source:HGNC Symbol;Acc:HGNC:13698]	protein_coding
ENSG00000111817	0.956407	4.82134	17.3922	0.00146204	0.0149033	DSE	6	dermatan sulfate epimerase [Source:HGNC Symbol;Acc:HGNC:21144]	protein_coding
ENSG00000130787	-1.53286	3.44752	17.3878	0.00146338	0.0149033	HIP1R	12	huntingtin interacting protein 1 related [Source:HGNC Symbol;Acc:HGNC:18415]	protein_coding
ENSG00000171951	2.07857	2.04745	17.3953	0.00146112	0.0149033	SCG2	2	secretogranin II [Source:HGNC Symbol;Acc:HGNC:10575]	protein_coding
ENSG00000181458	1.75232	4.39855	17.4011	0.00145937	0.0149033	TMEM45A	3	transmembrane protein 45A [Source:HGNC Symbol;Acc:HGNC:25480]	protein_coding
ENSG00000198042	-1.05884	5.19286	17.3871	0.00146359	0.0149033	MAK16	8	MAK16 homolog [Source:HGNC Symbol;Acc:HGNC:13703]	protein_coding
ENSG00000158122	0.948963	4.81803	17.3628	0.00147094	0.0149669	PRXL2C	9	peroxiredoxin like 2C [Source:HGNC Symbol;Acc:HGNC:16881]	protein_coding
ENSG00000126903	1.15214	5.34023	17.3582	0.00147234	0.0149699	SLC10A3	X	solute carrier family 10 member 3 [Source:HGNC Symbol;Acc:HGNC:22979]	protein_coding
ENSG00000143369	1.34671	2.91829	17.3416	0.0014774	0.0150101	ECM1	1	extracellular matrix protein 1 [Source:HGNC Symbol;Acc:HGNC:3153]	protein_coding
ENSG00000105048	1.3098	3.83019	17.336	0.00147913	0.0150164	TNNT1	19	troponin T1, slow skeletal type [Source:HGNC Symbol;Acc:HGNC:11948]	protein_coding
ENSG00000134028	3.01139	2.63024	17.3144	0.00148575	0.0150706	ADAMDEC1	8	ADAM like decysin 1 [Source:HGNC Symbol;Acc:HGNC:16299]	protein_coding
ENSG00000262406	3.7619	1.05681	19.6875	0.0014867	0.0150706	MMP12	11	matrix metallopeptidase 12 [Source:HGNC Symbol;Acc:HGNC:7158]	protein_coding
ENSG00000162078	1.31169	1.98252	17.284	0.00149513	0.0151447	ZG16B	16	zymogen granule protein 16B [Source:HGNC Symbol;Acc:HGNC:30456]	protein_coding
ENSG00000128791	0.868807	6.67793	17.2781	0.00149697	0.0151521	TWSG1	18	twisted gastrulation BMP signaling modulator 1 [Source:HGNC Symbol;Acc:HGNC:12429]	protein_coding
ENSG00000133393	0.855184	6.98761	17.2596	0.00150271	0.0151988	CEP20	16	centrosomal protein 20 [Source:HGNC Symbol;Acc:HGNC:26435]	protein_coding
ENSG00000010671	0.745937	8.11097	17.2529	0.00150479	0.0152085	BTK	X	Bruton tyrosine kinase [Source:HGNC Symbol;Acc:HGNC:1133]	protein_coding
ENSG00000160570	1.03309	4.98649	17.2196	0.00151524	0.0153027	DEDD2	19	death effector domain containing 2 [Source:HGNC Symbol;Acc:HGNC:24450]	protein_coding
ENSG00000140678	1.84401	3.79175	17.2048	0.00151992	0.0153385	ITGAX	16	integrin subunit alpha X [Source:HGNC Symbol;Acc:HGNC:6152]	protein_coding
ENSG00000011465	3.85723	-0.305237	17.1631	0.00153314	0.0154604	DCN	12	decorin [Source:HGNC Symbol;Acc:HGNC:2705]	protein_coding
ENSG00000067113	2.26913	6.36823	17.1489	0.00153769	0.0154832	PLPP1	5	phospholipid phosphatase 1 [Source:HGNC Symbol;Acc:HGNC:9228]	protein_coding
ENSG00000119632	2.13221	4.64199	17.1512	0.00153695	0.0154832	IFI27L2	14	interferon alpha inducible protein 27 like 2 [Source:HGNC Symbol;Acc:HGNC:19753]	protein_coding
ENSG00000004864	-0.683682	5.38453	17.1337	0.00154257	0.0154981	SLC25A13	7	solute carrier family 25 member 13 [Source:HGNC Symbol;Acc:HGNC:10983]	protein_coding
ENSG00000100154	-0.99757	3.13176	17.1265	0.00154489	0.0154981	TTC28	22	tetratricopeptide repeat domain 28 [Source:HGNC Symbol;Acc:HGNC:29179]	protein_coding
ENSG00000102898	-0.617654	7.23073	17.1341	0.00154245	0.0154981	NUTF2	16	nuclear transport factor 2 [Source:HGNC Symbol;Acc:HGNC:13722]	protein_coding
ENSG00000171723	-1.00706	4.0917	17.1281	0.00154438	0.0154981	GPHN	14	gephyrin [Source:HGNC Symbol;Acc:HGNC:15465]	protein_coding
ENSG00000173535	1.9312	1.10388	17.1336	0.00154262	0.0154981	TNFRSF10C	8	TNF receptor superfamily member 10c [Source:HGNC Symbol;Acc:HGNC:11906]	protein_coding
ENSG00000134363	1.94793	4.42495	17.1224	0.00154622	0.0154999	FST	5	follistatin [Source:HGNC Symbol;Acc:HGNC:3971]	protein_coding
ENSG00000104888	5.83717	0.121328	17.1158	0.00154833	0.0155096	SLC17A7	19	solute carrier family 17 member 7 [Source:HGNC Symbol;Acc:HGNC:16704]	protein_coding
ENSG00000066185	1.40815	1.57996	17.1061	0.00155147	0.0155297	ZMYND12	1	zinc finger MYND-type containing 12 [Source:HGNC Symbol;Acc:HGNC:21192]	protein_coding
ENSG00000276410	2.54301	-0.179556	17.1016	0.00155292	0.0155327	H2BC3	6	H2B clustered histone 3 [Source:HGNC Symbol;Acc:HGNC:4751]	protein_coding
ENSG00000177084	-1.34983	6.1338	17.0793	0.00156018	0.0155937	POLE	12	DNA polymerase epsilon, catalytic subunit [Source:HGNC Symbol;Acc:HGNC:9177]	protein_coding
ENSG00000087842	1.21572	4.75525	17.0439	0.00157176	0.0156929	PIR	X	pirin [Source:HGNC Symbol;Acc:HGNC:30048]	protein_coding
ENSG00000171208	-1.04688	4.63752	17.0419	0.00157241	0.0156929	NETO2	16	neuropilin and tolloid like 2 [Source:HGNC Symbol;Acc:HGNC:14644]	protein_coding
ENSG00000099246	1.46678	6.95323	17.0123	0.00158219	0.0157788	RAB18	10	RAB18, member RAS oncogene family [Source:HGNC Symbol;Acc:HGNC:14244]	protein_coding
ENSG00000136888	1.54154	7.59933	16.9989	0.00158664	0.0158047	ATP6V1G1	9	ATPase H+ transporting V1 subunit G1 [Source:HGNC Symbol;Acc:HGNC:864]	protein_coding
ENSG00000171793	-1.33135	6.27855	16.9974	0.00158712	0.0158047	CTPS1	1	CTP synthase 1 [Source:HGNC Symbol;Acc:HGNC:2519]	protein_coding
ENSG00000175324	1.30156	5.32637	16.9795	0.00159309	0.0158408	LSM1	8	LSM1 homolog, mRNA degradation associated [Source:HGNC Symbol;Acc:HGNC:20472]	protein_coding
ENSG00000180549	-2.04703	4.07443	16.98	0.00159294	0.0158408	FUT7	9	fucosyltransferase 7 [Source:HGNC Symbol;Acc:HGNC:4018]	protein_coding
ENSG00000134369	-0.962988	4.07865	16.952	0.0016023	0.0159208	NAV1	1	neuron navigator 1 [Source:HGNC Symbol;Acc:HGNC:15989]	protein_coding
ENSG00000170006	1.16187	6.8269	16.9354	0.00160789	0.0159529	TMEM154	4	transmembrane protein 154 [Source:HGNC Symbol;Acc:HGNC:26489]	protein_coding
ENSG00000196365	-1.30942	6.59034	16.9378	0.00160708	0.0159529	LONP1	19	lon peptidase 1, mitochondrial [Source:HGNC Symbol;Acc:HGNC:9479]	protein_coding
ENSG00000170921	-0.7645	3.62254	16.9112	0.0016161	0.0160226	TANC2	17	tetratricopeptide repeat, ankyrin repeat and coiled-coil containing 2 [Source:HGNC Symbol;Acc:HGNC:30212]	protein_coding
ENSG00000196502	0.728422	6.74027	16.8933	0.0016222	0.0160713	SULT1A1	16	sulfotransferase family 1A member 1 [Source:HGNC Symbol;Acc:HGNC:11453]	protein_coding
ENSG00000113048	-0.919072	7.01628	16.8883	0.0016239	0.0160764	MRPS27	5	mitochondrial ribosomal protein S27 [Source:HGNC Symbol;Acc:HGNC:14512]	protein_coding
ENSG00000105447	-0.573348	6.28785	16.874	0.00162878	0.0161129	GRWD1	19	glutamate rich WD repeat containing 1 [Source:HGNC Symbol;Acc:HGNC:21270]	protein_coding
ENSG00000083093	-0.609978	5.06249	16.8553	0.0016352	0.0161538	PALB2	16	partner and localizer of BRCA2 [Source:HGNC Symbol;Acc:HGNC:26144]	protein_coding
ENSG00000117594	3.86255	0.00545251	23.4479	0.0016353	0.0161538	HSD11B1	1	hydroxysteroid 11-beta dehydrogenase 1 [Source:HGNC Symbol;Acc:HGNC:5208]	protein_coding
ENSG00000051825	-0.8945	6.28726	16.8355	0.00164205	0.0161733	MPHOSPH9	12	M-phase phosphoprotein 9 [Source:HGNC Symbol;Acc:HGNC:7215]	protein_coding
ENSG00000108557	-1.11319	4.4033	16.8357	0.00164197	0.0161733	RAI1	17	retinoic acid induced 1 [Source:HGNC Symbol;Acc:HGNC:9834]	protein_coding
ENSG00000158691	-0.937294	3.89139	16.8411	0.00164011	0.0161733	ZSCAN12	6	zinc finger and SCAN domain containing 12 [Source:HGNC Symbol;Acc:HGNC:13172]	protein_coding
ENSG00000162407	1.80402	2.27031	16.8429	0.00163951	0.0161733	PLPP3	1	phospholipid phosphatase 3 [Source:HGNC Symbol;Acc:HGNC:9229]	protein_coding
ENSG00000169083	5.31855	0.749844	16.8235	0.00164621	0.0162025	AR	X	androgen receptor [Source:HGNC Symbol;Acc:HGNC:644]	protein_coding
ENSG00000171631	2.19574	1.45447	16.7995	0.00165456	0.0162729	P2RY6	11	pyrimidinergic receptor P2Y6 [Source:HGNC Symbol;Acc:HGNC:8543]	protein_coding
ENSG00000143799	-0.798332	8.63314	16.7876	0.00165873	0.016302	PARP1	1	poly(ADP-ribose) polymerase 1 [Source:HGNC Symbol;Acc:HGNC:270]	protein_coding
ENSG00000100241	-1.296	5.41649	16.7628	0.00166745	0.0163522	SBF1	22	SET binding factor 1 [Source:HGNC Symbol;Acc:HGNC:10542]	protein_coding
ENSG00000160883	2.0277	1.50391	16.7681	0.00166556	0.0163522	HK3	5	hexokinase 3 [Source:HGNC Symbol;Acc:HGNC:4925]	protein_coding
ENSG00000163071	5.83284	-0.173929	16.7636	0.00166715	0.0163522	SPATA18	4	spermatogenesis associated 18 [Source:HGNC Symbol;Acc:HGNC:29579]	protein_coding
ENSG00000062822	-1.55909	6.49044	16.7294	0.00167925	0.0164343	POLD1	19	DNA polymerase delta 1, catalytic subunit [Source:HGNC Symbol;Acc:HGNC:9175]	protein_coding
ENSG00000154589	1.55937	2.73408	16.7349	0.00167729	0.0164343	LY96	8	lymphocyte antigen 96 [Source:HGNC Symbol;Acc:HGNC:17156]	protein_coding
ENSG00000155926	1.51653	6.95842	16.7258	0.00168053	0.0164343	SLA	8	Src like adaptor [Source:HGNC Symbol;Acc:HGNC:10902]	protein_coding
ENSG00000169891	1.29027	2.74033	16.7254	0.00168068	0.0164343	REPS2	X	RALBP1 associated Eps domain containing 2 [Source:HGNC Symbol;Acc:HGNC:9963]	protein_coding
ENSG00000134759	-0.589679	6.21824	16.7067	0.00168733	0.0164874	ELP2	18	elongator acetyltransferase complex subunit 2 [Source:HGNC Symbol;Acc:HGNC:18248]	protein_coding
ENSG00000180071	-1.31474	2.75772	16.6892	0.00169361	0.0165369	ANKRD18A	9	ankyrin repeat domain 18A [Source:HGNC Symbol;Acc:HGNC:23643]	protein_coding
ENSG00000117525	-1.33767	2.46101	16.6821	0.00169615	0.0165497	F3	1	coagulation factor III, tissue factor [Source:HGNC Symbol;Acc:HGNC:3541]	protein_coding
ENSG00000136044	1.07334	4.94899	16.6594	0.00170436	0.0166178	APPL2	12	adaptor protein, phosphotyrosine interacting with PH domain and leucine zipper 2 [Source:HGNC Symbol;Acc:HGNC:18242]	protein_coding
ENSG00000128731	0.900058	6.43285	16.6474	0.00170871	0.0166483	HERC2	15	HECT and RLD domain containing E3 ubiquitin protein ligase 2 [Source:HGNC Symbol;Acc:HGNC:4868]	protein_coding
ENSG00000114316	0.522333	6.87887	16.6413	0.00171093	0.0166578	USP4	3	ubiquitin specific peptidase 4 [Source:HGNC Symbol;Acc:HGNC:12627]	protein_coding
ENSG00000168209	1.72117	4.44847	16.6374	0.00171234	0.0166597	DDIT4	10	DNA damage inducible transcript 4 [Source:HGNC Symbol;Acc:HGNC:24944]	protein_coding
ENSG00000162433	-0.647653	4.85453	16.625	0.00171686	0.0166878	AK4	1	adenylate kinase 4 [Source:HGNC Symbol;Acc:HGNC:363]	protein_coding
ENSG00000170271	1.7374	5.55324	16.6227	0.00171769	0.0166878	FAXDC2	5	fatty acid hydroxylase domain containing 2 [Source:HGNC Symbol;Acc:HGNC:1334]	protein_coding
ENSG00000161944	2.40116	2.10931	16.6184	0.00171927	0.0166911	ASGR2	17	asialoglycoprotein receptor 2 [Source:HGNC Symbol;Acc:HGNC:743]	protein_coding
ENSG00000100726	-1.74989	5.67525	16.6096	0.00172247	0.0167102	TELO2	16	telomere maintenance 2 [Source:HGNC Symbol;Acc:HGNC:29099]	protein_coding
ENSG00000235863	1.42754	3.30124	16.6057	0.0017239	0.0167121	B3GALT4	6	beta-1,3-galactosyltransferase 4 [Source:HGNC Symbol;Acc:HGNC:919]	protein_coding
ENSG00000173992	0.65	5.56613	16.5988	0.00172642	0.0167246	CCS	11	copper chaperone for superoxide dismutase [Source:HGNC Symbol;Acc:HGNC:1613]	protein_coding
ENSG00000148985	-1.00156	4.97988	16.573	0.00173595	0.0168049	PGAP2	11	post-GPI attachment to proteins 2 [Source:HGNC Symbol;Acc:HGNC:17893]	protein_coding
ENSG00000104980	-0.773085	5.34952	16.5607	0.0017405	0.0168368	TIMM44	19	translocase of inner mitochondrial membrane 44 [Source:HGNC Symbol;Acc:HGNC:17316]	protein_coding
ENSG00000037280	-4.54072	-0.522593	16.5515	0.00174392	0.0168397	FLT4	5	fms related receptor tyrosine kinase 4 [Source:HGNC Symbol;Acc:HGNC:3767]	protein_coding
ENSG00000135426	1.05316	7.71366	16.5547	0.0017427	0.0168397	TESPA1	12	thymocyte expressed, positive selection associated 1 [Source:HGNC Symbol;Acc:HGNC:29109]	protein_coding
ENSG00000258227	1.47822	4.96737	16.5498	0.00174452	0.0168397	CLEC5A	7	C-type lectin domain containing 5A [Source:HGNC Symbol;Acc:HGNC:2054]	protein_coding
ENSG00000112031	0.876181	3.7595	16.5454	0.00174619	0.0168438	MTRF1L	6	mitochondrial translational release factor 1 like [Source:HGNC Symbol;Acc:HGNC:21051]	protein_coding
ENSG00000116711	0.995893	6.15164	16.5328	0.00175088	0.016877	PLA2G4A	1	phospholipase A2 group IVA [Source:HGNC Symbol;Acc:HGNC:9035]	protein_coding
ENSG00000198898	1.34684	8.52125	16.5285	0.00175248	0.0168804	CAPZA2	7	capping actin protein of muscle Z-line subunit alpha 2 [Source:HGNC Symbol;Acc:HGNC:1490]	protein_coding
ENSG00000130311	0.625543	4.83499	16.5198	0.00175574	0.0168997	DDA1	19	DET1 and DDB1 associated 1 [Source:HGNC Symbol;Acc:HGNC:28360]	protein_coding
ENSG00000095794	1.17964	4.00307	16.4952	0.00176496	0.0169765	CREM	10	cAMP responsive element modulator [Source:HGNC Symbol;Acc:HGNC:2352]	protein_coding
ENSG00000198467	1.70832	2.43338	16.4817	0.00177008	0.0170137	TPM2	9	tropomyosin 2 [Source:HGNC Symbol;Acc:HGNC:12011]	protein_coding
ENSG00000163739	4.07712	1.615	16.4782	0.00177137	0.017014	CXCL1	4	C-X-C motif chemokine ligand 1 [Source:HGNC Symbol;Acc:HGNC:4602]	protein_coding
ENSG00000069702	4.86028	0.752718	16.4634	0.001777	0.017024	TGFBR3	1	transforming growth factor beta receptor 3 [Source:HGNC Symbol;Acc:HGNC:11774]	protein_coding
ENSG00000181704	1.34582	5.88122	16.4622	0.00177744	0.017024	YIPF6	X	Yip1 domain family member 6 [Source:HGNC Symbol;Acc:HGNC:28304]	protein_coding
ENSG00000185730	-1.12272	3.26453	16.4677	0.00177537	0.017024	ZNF696	8	zinc finger protein 696 [Source:HGNC Symbol;Acc:HGNC:25872]	protein_coding
ENSG00000247596	0.651474	6.30593	16.465	0.00177638	0.017024	TWF2	3	twinfilin actin binding protein 2 [Source:HGNC Symbol;Acc:HGNC:9621]	protein_coding
ENSG00000112742	1.13585	6.94956	16.4451	0.00178398	0.0170625	TTK	6	TTK protein kinase [Source:HGNC Symbol;Acc:HGNC:12401]	protein_coding
ENSG00000262814	-0.785647	3.92681	16.4479	0.00178289	0.0170625	MRPL12	17	mitochondrial ribosomal protein L12 [Source:HGNC Symbol;Acc:HGNC:10378]	protein_coding
ENSG00000074621	-1.47835	3.16554	16.4323	0.00178888	0.0170939	SLC24A1	15	solute carrier family 24 member 1 [Source:HGNC Symbol;Acc:HGNC:10975]	protein_coding
ENSG00000163935	-0.937325	3.13818	16.4299	0.00178979	0.0170939	SFMBT1	3	Scm like with four mbt domains 1 [Source:HGNC Symbol;Acc:HGNC:20255]	protein_coding
ENSG00000121577	2.20798	1.68658	16.4182	0.00179429	0.0171247	POPDC2	3	popeye domain containing 2 [Source:HGNC Symbol;Acc:HGNC:17648]	protein_coding
ENSG00000213719	1.52134	9.74196	16.4098	0.0017975	0.0171433	CLIC1	6	chloride intracellular channel 1 [Source:HGNC Symbol;Acc:HGNC:2062]	protein_coding
ENSG00000143375	-3.5993	0.191285	16.4008	0.00180097	0.0171643	CGN	1	cingulin [Source:HGNC Symbol;Acc:HGNC:17429]	protein_coding
ENSG00000128524	1.15049	7.50236	16.3864	0.00180655	0.0172054	ATP6V1F	7	ATPase H+ transporting V1 subunit F [Source:HGNC Symbol;Acc:HGNC:16832]	protein_coding
ENSG00000089820	-1.49503	6.52681	16.3814	0.00180848	0.0172117	ARHGAP4	X	Rho GTPase activating protein 4 [Source:HGNC Symbol;Acc:HGNC:674]	protein_coding
ENSG00000115761	-0.799663	5.53668	16.3648	0.00181494	0.0172326	NOL10	2	nucleolar protein 10 [Source:HGNC Symbol;Acc:HGNC:25862]	protein_coding
ENSG00000162366	2.13467	-0.166144	16.3637	0.00181538	0.0172326	PDZK1IP1	1	PDZK1 interacting protein 1 [Source:HGNC Symbol;Acc:HGNC:16887]	protein_coding
ENSG00000165138	-1.04931	3.27568	16.3627	0.00181577	0.0172326	ANKS6	9	ankyrin repeat and sterile alpha motif domain containing 6 [Source:HGNC Symbol;Acc:HGNC:26724]	protein_coding
ENSG00000171219	-2.42314	0.193103	16.3635	0.00181545	0.0172326	CDC42BPG	11	CDC42 binding protein kinase gamma [Source:HGNC Symbol;Acc:HGNC:29829]	protein_coding
ENSG00000166920	5.37955	-0.305783	18.5019	0.00182086	0.0172594	C15orf48	15	chromosome 15 open reading frame 48 [Source:HGNC Symbol;Acc:HGNC:29898]	protein_coding
ENSG00000175104	0.969089	4.87814	16.3489	0.00182114	0.0172594	TRAF6	11	TNF receptor associated factor 6 [Source:HGNC Symbol;Acc:HGNC:12036]	protein_coding
ENSG00000104904	0.999931	10.0346	16.3331	0.00182733	0.0172755	OAZ1	19	ornithine decarboxylase antizyme 1 [Source:HGNC Symbol;Acc:HGNC:8095]	protein_coding
ENSG00000126775	-0.78463	4.36629	16.3398	0.00182469	0.0172755	ATG14	14	autophagy related 14 [Source:HGNC Symbol;Acc:HGNC:19962]	protein_coding
ENSG00000144645	2.26108	-0.34557	16.325	0.00183049	0.0172755	OSBPL10	3	oxysterol binding protein like 10 [Source:HGNC Symbol;Acc:HGNC:16395]	protein_coding
ENSG00000163362	-2.78707	0.485492	16.3291	0.0018289	0.0172755	INAVA	1	innate immunity activator [Source:HGNC Symbol;Acc:HGNC:25599]	protein_coding
ENSG00000163864	-1.56776	4.95708	16.336	0.00182619	0.0172755	NMNAT3	3	nicotinamide nucleotide adenylyltransferase 3 [Source:HGNC Symbol;Acc:HGNC:20989]	protein_coding
ENSG00000170153	-4.20351	-0.625933	16.327	0.00182974	0.0172755	RNF150	4	ring finger protein 150 [Source:HGNC Symbol;Acc:HGNC:23138]	protein_coding
ENSG00000136052	2.68773	0.615551	16.3004	0.00184022	0.0173552	SLC41A2	12	solute carrier family 41 member 2 [Source:HGNC Symbol;Acc:HGNC:31045]	protein_coding
ENSG00000213967	-0.947695	3.37099	16.297	0.00184157	0.0173559	ZNF726	19	zinc finger protein 726 [Source:HGNC Symbol;Acc:HGNC:32462]	protein_coding
ENSG00000106993	1.39026	4.7964	16.2711	0.00185184	0.0174043	CDC37L1	9	cell division cycle 37 like 1 [Source:HGNC Symbol;Acc:HGNC:17179]	protein_coding
ENSG00000145703	0.598897	8.39331	16.272	0.00185152	0.0174043	IQGAP2	5	IQ motif containing GTPase activating protein 2 [Source:HGNC Symbol;Acc:HGNC:6111]	protein_coding
ENSG00000162368	0.616345	7.64405	16.2713	0.00185179	0.0174043	CMPK1	1	cytidine/uridine monophosphate kinase 1 [Source:HGNC Symbol;Acc:HGNC:18170]	protein_coding
ENSG00000170759	0.844044	7.58919	16.2744	0.00185056	0.0174043	KIF5B	10	kinesin family member 5B [Source:HGNC Symbol;Acc:HGNC:6324]	protein_coding
ENSG00000109667	0.709897	3.73553	16.241	0.00186392	0.0175056	SLC2A9	4	solute carrier family 2 member 9 [Source:HGNC Symbol;Acc:HGNC:13446]	protein_coding
ENSG00000129472	0.735191	4.27615	16.2337	0.00186687	0.017517	RAB2B	14	RAB2B, member RAS oncogene family [Source:HGNC Symbol;Acc:HGNC:20246]	protein_coding
ENSG00000158270	4.84152	2.00548	16.2316	0.00186772	0.017517	COLEC12	18	collectin subfamily member 12 [Source:HGNC Symbol;Acc:HGNC:16016]	protein_coding
ENSG00000158481	4.2335	-0.563409	22.3814	0.00186924	0.0175191	CD1C	1	CD1c molecule [Source:HGNC Symbol;Acc:HGNC:1636]	protein_coding
ENSG00000188042	1.09185	5.16275	16.222	0.00187157	0.0175288	ARL4C	2	ADP ribosylation factor like GTPase 4C [Source:HGNC Symbol;Acc:HGNC:698]	protein_coding
ENSG00000140092	-3.3977	0.77271	16.2077	0.00187735	0.0175708	FBLN5	14	fibulin 5 [Source:HGNC Symbol;Acc:HGNC:3602]	protein_coding
ENSG00000119318	-1.19668	6.039	16.1954	0.00188234	0.0175994	RAD23B	9	RAD23 homolog B, nucleotide excision repair protein [Source:HGNC Symbol;Acc:HGNC:9813]	protein_coding
ENSG00000130726	-0.982732	7.9494	16.1938	0.00188301	0.0175994	TRIM28	19	tripartite motif containing 28 [Source:HGNC Symbol;Acc:HGNC:16384]	protein_coding
ENSG00000110077	2.34816	3.10618	16.1845	0.00188679	0.0176139	MS4A6A	11	membrane spanning 4-domains A6A [Source:HGNC Symbol;Acc:HGNC:13375]	protein_coding
ENSG00000128923	1.06199	5.04619	16.1836	0.00188715	0.0176139	MINDY2	15	MINDY lysine 48 deubiquitinase 2 [Source:HGNC Symbol;Acc:HGNC:26954]	protein_coding
ENSG00000156787	-0.613543	4.73578	16.1799	0.00188865	0.0176157	TBC1D31	8	TBC1 domain family member 31 [Source:HGNC Symbol;Acc:HGNC:30888]	protein_coding
ENSG00000160352	-1.19306	5.87269	16.1753	0.00189053	0.0176211	ZNF714	19	zinc finger protein 714 [Source:HGNC Symbol;Acc:HGNC:27124]	protein_coding
ENSG00000121988	-0.759157	4.3638	16.1669	0.00189398	0.0176411	ZRANB3	2	zinc finger RANBP2-type containing 3 [Source:HGNC Symbol;Acc:HGNC:25249]	protein_coding
ENSG00000006831	0.849784	4.67292	16.1488	0.00190143	0.0176983	ADIPOR2	12	adiponectin receptor 2 [Source:HGNC Symbol;Acc:HGNC:24041]	protein_coding
ENSG00000106609	0.631669	7.79827	16.1425	0.00190399	0.01771	TMEM248	7	transmembrane protein 248 [Source:HGNC Symbol;Acc:HGNC:25476]	protein_coding
ENSG00000168421	0.637262	6.08908	16.1286	0.00190976	0.0177515	RHOH	4	ras homolog family member H [Source:HGNC Symbol;Acc:HGNC:686]	protein_coding
ENSG00000109743	1.58094	6.05421	16.1068	0.0019188	0.017811	BST1	4	bone marrow stromal cell antigen 1 [Source:HGNC Symbol;Acc:HGNC:1118]	protein_coding
ENSG00000122547	1.34607	3.46934	16.1099	0.00191752	0.017811	EEPD1	7	endonuclease/exonuclease/phosphatase family domain containing 1 [Source:HGNC Symbol;Acc:HGNC:22223]	protein_coding
ENSG00000040633	0.651332	5.52119	16.0853	0.00192774	0.0178686	PHF23	17	PHD finger protein 23 [Source:HGNC Symbol;Acc:HGNC:28428]	protein_coding
ENSG00000177854	0.937835	3.22578	16.0828	0.0019288	0.0178686	TMEM187	X	transmembrane protein 187 [Source:HGNC Symbol;Acc:HGNC:13705]	protein_coding
ENSG00000214456	-2.12945	1.69649	16.0793	0.00193027	0.0178686	PLIN5	19	perilipin 5 [Source:HGNC Symbol;Acc:HGNC:33196]	protein_coding
ENSG00000215193	-1.35133	3.61828	16.0818	0.0019292	0.0178686	PEX26	22	peroxisomal biogenesis factor 26 [Source:HGNC Symbol;Acc:HGNC:22965]	protein_coding
ENSG00000213585	-0.572023	7.99801	16.0714	0.00193356	0.0178746	VDAC1	5	voltage dependent anion channel 1 [Source:HGNC Symbol;Acc:HGNC:12669]	protein_coding
ENSG00000254999	0.989482	7.7216	16.0717	0.00193346	0.0178746	BRK1	3	BRICK1 subunit of SCAR/WAVE actin nucleating complex [Source:HGNC Symbol;Acc:HGNC:23057]	protein_coding
ENSG00000105289	-3.0402	-0.870777	16.0578	0.00193931	0.0179154	TJP3	19	tight junction protein 3 [Source:HGNC Symbol;Acc:HGNC:11829]	protein_coding
ENSG00000137312	1.07397	7.45175	16.0421	0.00194593	0.0179523	FLOT1	6	flotillin 1 [Source:HGNC Symbol;Acc:HGNC:3757]	protein_coding
ENSG00000157538	0.615888	7.06308	16.042	0.00194594	0.0179523	VPS26C	21	VPS26 endosomal protein sorting factor C [Source:HGNC Symbol;Acc:HGNC:3044]	protein_coding
ENSG00000118655	-0.960144	4.71079	16.0348	0.00194899	0.0179681	DCLRE1B	1	DNA cross-link repair 1B [Source:HGNC Symbol;Acc:HGNC:17641]	protein_coding
ENSG00000104549	0.629574	9.05794	16.0297	0.00195118	0.017976	SQLE	8	squalene epoxidase [Source:HGNC Symbol;Acc:HGNC:11279]	protein_coding
ENSG00000048991	-0.710328	6.08404	16.0236	0.00195376	0.0179876	R3HDM1	2	R3H domain containing 1 [Source:HGNC Symbol;Acc:HGNC:9757]	protein_coding
ENSG00000089876	-0.601639	5.91255	16.0035	0.00196232	0.017993	DHX32	10	DEAH-box helicase 32 (putative) [Source:HGNC Symbol;Acc:HGNC:16717]	protein_coding
ENSG00000091106	1.74958	1.03863	16.0056	0.00196144	0.017993	NLRC4	2	NLR family CARD domain containing 4 [Source:HGNC Symbol;Acc:HGNC:16412]	protein_coding
ENSG00000108773	-1.10156	5.01519	16.0062	0.00196119	0.017993	KAT2A	17	lysine acetyltransferase 2A [Source:HGNC Symbol;Acc:HGNC:4201]	protein_coding
ENSG00000121858	1.32173	5.36189	16.0086	0.00196015	0.017993	TNFSF10	3	TNF superfamily member 10 [Source:HGNC Symbol;Acc:HGNC:11925]	protein_coding
ENSG00000155097	0.705341	6.72016	16.0096	0.00195973	0.017993	ATP6V1C1	8	ATPase H+ transporting V1 subunit C1 [Source:HGNC Symbol;Acc:HGNC:856]	protein_coding
ENSG00000215883	-0.737113	4.04733	16.0054	0.00196153	0.017993	CYB5RL	1	cytochrome b5 reductase like [Source:HGNC Symbol;Acc:HGNC:32220]	protein_coding
ENSG00000149311	-0.682474	5.5548	15.9971	0.00196507	0.018006	ATM	11	ATM serine/threonine kinase [Source:HGNC Symbol;Acc:HGNC:795]	protein_coding
ENSG00000086589	0.560298	6.62471	15.9854	0.00197006	0.0180336	RBM22	5	RNA binding motif protein 22 [Source:HGNC Symbol;Acc:HGNC:25503]	protein_coding
ENSG00000124772	3.08186	0.696418	15.9814	0.00197177	0.0180336	CPNE5	6	copine 5 [Source:HGNC Symbol;Acc:HGNC:2318]	protein_coding
ENSG00000239900	-0.720125	4.01998	15.9807	0.00197207	0.0180336	ADSL	22	adenylosuccinate lyase [Source:HGNC Symbol;Acc:HGNC:291]	protein_coding
ENSG00000136875	-0.561475	6.30715	15.9467	0.00198676	0.0181544	PRPF4	9	pre-mRNA processing factor 4 [Source:HGNC Symbol;Acc:HGNC:17349]	protein_coding
ENSG00000176454	-0.864052	4.4056	15.9439	0.00198796	0.0181544	LPCAT4	15	lysophosphatidylcholine acyltransferase 4 [Source:HGNC Symbol;Acc:HGNC:30059]	protein_coding
ENSG00000079277	0.610248	5.66185	15.9296	0.00199418	0.0181973	MKNK1	1	MAPK interacting serine/threonine kinase 1 [Source:HGNC Symbol;Acc:HGNC:7110]	protein_coding
ENSG00000099377	1.06322	3.79227	15.9269	0.00199535	0.0181973	HSD3B7	16	hydroxy-delta-5-steroid dehydrogenase, 3 beta- and steroid delta-isomerase 7 [Source:HGNC Symbol;Acc:HGNC:18324]	protein_coding
ENSG00000107625	-0.528556	6.11282	15.9117	0.00200202	0.0182409	DDX50	10	DExD-box helicase 50 [Source:HGNC Symbol;Acc:HGNC:17906]	protein_coding
ENSG00000166592	4.73238	-0.805914	15.9098	0.00200282	0.0182409	RRAD	16	RRAD, Ras related glycolysis inhibitor and calcium channel regulator [Source:HGNC Symbol;Acc:HGNC:10446]	protein_coding
ENSG00000102362	1.13941	4.99703	15.8833	0.00201445	0.0182913	SYTL4	X	synaptotagmin like 4 [Source:HGNC Symbol;Acc:HGNC:15588]	protein_coding
ENSG00000106615	1.41966	7.35045	15.8826	0.00201476	0.0182913	RHEB	7	Ras homolog, mTORC1 binding [Source:HGNC Symbol;Acc:HGNC:10011]	protein_coding
ENSG00000140740	0.8568	8.42469	15.8818	0.0020151	0.0182913	UQCRC2	16	ubiquinol-cytochrome c reductase core protein 2 [Source:HGNC Symbol;Acc:HGNC:12586]	protein_coding
ENSG00000152284	2.85644	-0.685993	15.8887	0.00201208	0.0182913	TCF7L1	2	transcription factor 7 like 1 [Source:HGNC Symbol;Acc:HGNC:11640]	protein_coding
ENSG00000176225	-1.30372	4.23189	15.8938	0.00200984	0.0182913	RTTN	18	rotatin [Source:HGNC Symbol;Acc:HGNC:18654]	protein_coding
ENSG00000095917	3.08699	7.79003	15.8708	0.00201996	0.0183231	TPSD1	16	tryptase delta 1 [Source:HGNC Symbol;Acc:HGNC:14118]	protein_coding
ENSG00000182810	-0.79223	5.23182	15.8509	0.0020288	0.018391	DDX28	16	DEAD-box helicase 28 [Source:HGNC Symbol;Acc:HGNC:17330]	protein_coding
ENSG00000276023	1.01397	5.26869	15.8438	0.00203197	0.0184073	DUSP14	17	dual specificity phosphatase 14 [Source:HGNC Symbol;Acc:HGNC:17007]	protein_coding
ENSG00000155966	-0.904443	3.51715	15.837	0.00203499	0.0184224	AFF2	X	AF4/FMR2 family member 2 [Source:HGNC Symbol;Acc:HGNC:3776]	protein_coding
ENSG00000239713	1.4765	5.07242	15.819	0.00204304	0.0184829	APOBEC3G	22	apolipoprotein B mRNA editing enzyme catalytic subunit 3G [Source:HGNC Symbol;Acc:HGNC:17357]	protein_coding
ENSG00000102409	1.14565	7.49355	15.8037	0.00204989	0.0185325	BEX4	X	brain expressed X-linked 4 [Source:HGNC Symbol;Acc:HGNC:25475]	protein_coding
ENSG00000109270	1.20911	6.47431	15.796	0.00205334	0.0185387	LAMTOR3	4	late endosomal/lysosomal adaptor, MAPK and MTOR activator 3 [Source:HGNC Symbol;Acc:HGNC:15606]	protein_coding
ENSG00000130204	-0.66359	6.58589	15.7922	0.00205508	0.0185387	TOMM40	19	translocase of outer mitochondrial membrane 40 [Source:HGNC Symbol;Acc:HGNC:18001]	protein_coding
ENSG00000143458	-0.886261	3.68686	15.79	0.00205605	0.0185387	GABPB2	1	GA binding protein transcription factor subunit beta 2 [Source:HGNC Symbol;Acc:HGNC:28441]	protein_coding
ENSG00000149679	-1.12904	4.17055	15.7948	0.00205389	0.0185387	CABLES2	20	Cdk5 and Abl enzyme substrate 2 [Source:HGNC Symbol;Acc:HGNC:16143]	protein_coding
ENSG00000123595	1.02919	5.33914	15.7791	0.00206101	0.018571	RAB9A	X	RAB9A, member RAS oncogene family [Source:HGNC Symbol;Acc:HGNC:9792]	protein_coding
ENSG00000164070	-0.652018	5.3239	15.7731	0.00206371	0.018583	HSPA4L	4	heat shock protein family A (Hsp70) member 4 like [Source:HGNC Symbol;Acc:HGNC:17041]	protein_coding
ENSG00000005100	-0.806453	3.68865	15.7456	0.0020762	0.018683	DHX33	17	DEAH-box helicase 33 [Source:HGNC Symbol;Acc:HGNC:16718]	protein_coding
ENSG00000012779	1.14859	6.18968	15.7295	0.00208357	0.0187081	ALOX5	10	arachidonate 5-lipoxygenase [Source:HGNC Symbol;Acc:HGNC:435]	protein_coding
ENSG00000166436	-1.17011	2.87461	15.734	0.0020815	0.0187081	TRIM66	11	tripartite motif containing 66 [Source:HGNC Symbol;Acc:HGNC:29005]	protein_coding
ENSG00000214029	-1.34384	3.23213	15.7275	0.00208451	0.0187081	ZNF891	12	zinc finger protein 891 [Source:HGNC Symbol;Acc:HGNC:38709]	protein_coding
ENSG00000255587	-0.70826	4.97081	15.7309	0.00208296	0.0187081	RAB44	6	RAB44, member RAS oncogene family [Source:HGNC Symbol;Acc:HGNC:21068]	protein_coding
ENSG00000103037	-1.02795	3.78818	15.6969	0.00209857	0.0188218	SETD6	16	SET domain containing 6, protein lysine methyltransferase [Source:HGNC Symbol;Acc:HGNC:26116]	protein_coding
ENSG00000178852	0.887765	2.98154	15.6901	0.00210172	0.0188376	EFCAB13	17	EF-hand calcium binding domain 13 [Source:HGNC Symbol;Acc:HGNC:26864]	protein_coding
ENSG00000153347	2.6242	0.538113	15.6754	0.00210857	0.0188865	FAM81B	5	family with sequence similarity 81 member B [Source:HGNC Symbol;Acc:HGNC:26335]	protein_coding
ENSG00000197746	0.875872	10.367	15.6684	0.00211179	0.0189028	PSAP	10	prosaposin [Source:HGNC Symbol;Acc:HGNC:9498]	protein_coding
ENSG00000013364	1.25419	5.34362	15.6588	0.0021163	0.0189182	MVP	16	major vault protein [Source:HGNC Symbol;Acc:HGNC:7531]	protein_coding
ENSG00000137767	1.13701	5.26807	15.6602	0.00211565	0.0189182	SQOR	15	sulfide quinone oxidoreductase [Source:HGNC Symbol;Acc:HGNC:20390]	protein_coding
ENSG00000092068	2.51821	3.82489	15.6509	0.00212	0.0189388	SLC7A8	14	solute carrier family 7 member 8 [Source:HGNC Symbol;Acc:HGNC:11066]	protein_coding
ENSG00000075340	-3.15636	3.79432	15.6386	0.00212573	0.0189774	ADD2	2	adducin 2 [Source:HGNC Symbol;Acc:HGNC:244]	protein_coding
ENSG00000142168	0.865496	8.58851	15.6326	0.00212857	0.0189777	SOD1	21	superoxide dismutase 1 [Source:HGNC Symbol;Acc:HGNC:11179]	protein_coding
ENSG00000153029	1.04988	6.04602	15.6333	0.00212822	0.0189777	MR1	1	major histocompatibility complex, class I-related [Source:HGNC Symbol;Acc:HGNC:4975]	protein_coding
ENSG00000171659	2.41238	4.89612	15.6284	0.00213054	0.0189828	GPR34	X	G protein-coupled receptor 34 [Source:HGNC Symbol;Acc:HGNC:4490]	protein_coding
ENSG00000099337	1.22371	6.10339	15.6208	0.00213413	0.0190023	KCNK6	19	potassium two pore domain channel subfamily K member 6 [Source:HGNC Symbol;Acc:HGNC:6281]	protein_coding
ENSG00000198478	1.99607	5.62594	15.6079	0.00214019	0.0190438	SH3BGRL2	6	SH3 domain binding glutamate rich protein like 2 [Source:HGNC Symbol;Acc:HGNC:15567]	protein_coding
ENSG00000185015	1.26144	2.98476	15.5861	0.00215054	0.0191233	CA13	8	carbonic anhydrase 13 [Source:HGNC Symbol;Acc:HGNC:14914]	protein_coding
ENSG00000162923	0.688549	4.90842	15.5741	0.00215628	0.0191617	WDR26	1	WD repeat domain 26 [Source:HGNC Symbol;Acc:HGNC:21208]	protein_coding
ENSG00000100614	0.799608	5.44829	15.5679	0.00215926	0.0191628	PPM1A	14	protein phosphatase, Mg2+/Mn2+ dependent 1A [Source:HGNC Symbol;Acc:HGNC:9275]	protein_coding
ENSG00000101745	1.40561	6.94343	15.5688	0.00215879	0.0191628	ANKRD12	18	ankyrin repeat domain 12 [Source:HGNC Symbol;Acc:HGNC:29135]	protein_coding
ENSG00000113583	0.708513	6.54713	15.565	0.00216064	0.0191628	C5orf15	5	chromosome 5 open reading frame 15 [Source:HGNC Symbol;Acc:HGNC:20656]	protein_coding
ENSG00000146143	-0.713938	4.95876	15.5571	0.00216443	0.0191838	PRIM2	6	DNA primase subunit 2 [Source:HGNC Symbol;Acc:HGNC:9370]	protein_coding
ENSG00000136193	-0.898947	6.87785	15.5453	0.00217006	0.0192211	SCRN1	7	secernin 1 [Source:HGNC Symbol;Acc:HGNC:22192]	protein_coding
ENSG00000161800	-0.686049	7.2665	15.5212	0.00218171	0.0193026	RACGAP1	12	Rac GTPase activating protein 1 [Source:HGNC Symbol;Acc:HGNC:9804]	protein_coding
ENSG00000196839	0.889147	7.18854	15.5204	0.00218211	0.0193026	ADA	20	adenosine deaminase [Source:HGNC Symbol;Acc:HGNC:186]	protein_coding
ENSG00000133816	-1.18312	5.00136	15.5065	0.00218884	0.0193369	MICAL2	11	microtubule associated monooxygenase, calponin and LIM domain containing 2 [Source:HGNC Symbol;Acc:HGNC:24693]	protein_coding
ENSG00000172967	1.41398	0.687019	15.5072	0.00218848	0.0193369	XKR3	22	XK related 3 [Source:HGNC Symbol;Acc:HGNC:28778]	protein_coding
ENSG00000131969	1.59557	2.07556	15.4925	0.00219564	0.0193844	ABHD12B	14	abhydrolase domain containing 12B [Source:HGNC Symbol;Acc:HGNC:19837]	protein_coding
ENSG00000079435	-1.10006	2.08678	15.4889	0.00219739	0.0193872	LIPE	19	lipase E, hormone sensitive type [Source:HGNC Symbol;Acc:HGNC:6621]	protein_coding
ENSG00000101194	-1.83956	5.73919	15.4716	0.00220586	0.0194492	SLC17A9	20	solute carrier family 17 member 9 [Source:HGNC Symbol;Acc:HGNC:16192]	protein_coding
ENSG00000162062	-0.819694	4.27621	15.458	0.00221255	0.0194955	TEDC2	16	tubulin epsilon and delta complex 2 [Source:HGNC Symbol;Acc:HGNC:25849]	protein_coding
ENSG00000048392	1.0325	6.05535	15.4424	0.00222023	0.0195377	RRM2B	8	ribonucleotide reductase regulatory TP53 inducible subunit M2B [Source:HGNC Symbol;Acc:HGNC:17296]	protein_coding
ENSG00000103932	-1.20411	5.47461	15.4438	0.00221956	0.0195377	RPAP1	15	RNA polymerase II associated protein 1 [Source:HGNC Symbol;Acc:HGNC:24567]	protein_coding
ENSG00000168003	0.888769	8.23892	15.436	0.0022234	0.019553	SLC3A2	11	solute carrier family 3 member 2 [Source:HGNC Symbol;Acc:HGNC:11026]	protein_coding
ENSG00000187608	1.66014	4.38971	15.4105	0.00223609	0.0196517	ISG15	1	ISG15 ubiquitin like modifier [Source:HGNC Symbol;Acc:HGNC:4053]	protein_coding
ENSG00000114209	1.80186	7.43	15.4068	0.00223791	0.019655	PDCD10	3	programmed cell death 10 [Source:HGNC Symbol;Acc:HGNC:8761]	protein_coding
ENSG00000110880	0.999924	8.19774	15.3985	0.00224205	0.0196786	CORO1C	12	coronin 1C [Source:HGNC Symbol;Acc:HGNC:2254]	protein_coding
ENSG00000123933	0.892334	6.30851	15.3934	0.00224462	0.0196884	MXD4	4	MAX dimerization protein 4 [Source:HGNC Symbol;Acc:HGNC:13906]	protein_coding
ENSG00000054148	2.31062	7.93011	15.386	0.00224834	0.0197065	PHPT1	9	phosphohistidine phosphatase 1 [Source:HGNC Symbol;Acc:HGNC:30033]	protein_coding
ENSG00000134013	1.62145	-0.427571	15.3835	0.00224959	0.0197065	LOXL2	8	lysyl oxidase like 2 [Source:HGNC Symbol;Acc:HGNC:6666]	protein_coding
ENSG00000121895	-1.10283	3.70832	15.3723	0.00225519	0.0197427	TMEM156	4	transmembrane protein 156 [Source:HGNC Symbol;Acc:HGNC:26260]	protein_coding
ENSG00000085276	-0.979801	4.66651	15.3661	0.00225834	0.0197576	MECOM	3	MDS1 and EVI1 complex locus [Source:HGNC Symbol;Acc:HGNC:3498]	protein_coding
ENSG00000115306	-1.0261	6.45108	15.3288	0.00227721	0.0198644	SPTBN1	2	spectrin beta, non-erythrocytic 1 [Source:HGNC Symbol;Acc:HGNC:11275]	protein_coding
ENSG00000125730	4.23816	0.391183	15.3275	0.00227789	0.0198644	C3	19	complement C3 [Source:HGNC Symbol;Acc:HGNC:1318]	protein_coding
ENSG00000138050	1.08166	5.30077	15.3275	0.00227788	0.0198644	THUMPD2	2	THUMP domain containing 2 [Source:HGNC Symbol;Acc:HGNC:14890]	protein_coding
ENSG00000160949	-1.07826	5.24465	15.3296	0.00227681	0.0198644	TONSL	8	tonsoku like, DNA repair protein [Source:HGNC Symbol;Acc:HGNC:7801]	protein_coding
ENSG00000197928	0.699835	4.12593	15.3382	0.00227243	0.0198644	ZNF677	19	zinc finger protein 677 [Source:HGNC Symbol;Acc:HGNC:28730]	protein_coding
ENSG00000133112	0.587361	9.20902	15.3178	0.00228285	0.0198948	TPT1	13	tumor protein, translationally-controlled 1 [Source:HGNC Symbol;Acc:HGNC:12022]	protein_coding
ENSG00000170385	2.06437	3.8813	15.2811	0.00230167	0.020046	SLC30A1	1	solute carrier family 30 member 1 [Source:HGNC Symbol;Acc:HGNC:11012]	protein_coding
ENSG00000117151	0.581764	4.99061	15.2664	0.00230924	0.0200861	CTBS	1	chitobiase [Source:HGNC Symbol;Acc:HGNC:2496]	protein_coding
ENSG00000164081	0.676392	5.91486	15.269	0.00230794	0.0200861	TEX264	3	testis expressed 264, ER-phagy receptor [Source:HGNC Symbol;Acc:HGNC:30247]	protein_coding
ENSG00000249471	-1.43774	1.69816	15.2585	0.00231335	0.020109	ZNF324B	19	zinc finger protein 324B [Source:HGNC Symbol;Acc:HGNC:33107]	protein_coding
ENSG00000102471	1.75282	5.73125	15.2501	0.00231769	0.0201338	NDFIP2	13	Nedd4 family interacting protein 2 [Source:HGNC Symbol;Acc:HGNC:18537]	protein_coding
ENSG00000129116	1.66666	2.63111	15.2414	0.00232222	0.0201532	PALLD	4	palladin, cytoskeletal associated protein [Source:HGNC Symbol;Acc:HGNC:17068]	protein_coding
ENSG00000160188	1.85495	1.28725	15.2401	0.00232291	0.0201532	RSPH1	21	radial spoke head component 1 [Source:HGNC Symbol;Acc:HGNC:12371]	protein_coding
ENSG00000122877	3.56453	0.260088	15.2311	0.00232764	0.0201555	EGR2	10	early growth response 2 [Source:HGNC Symbol;Acc:HGNC:3239]	protein_coding
ENSG00000148175	1.67051	9.32956	15.2361	0.00232501	0.0201555	STOM	9	stomatin [Source:HGNC Symbol;Acc:HGNC:3383]	protein_coding
ENSG00000171860	2.2191	6.59891	15.2321	0.00232708	0.0201555	C3AR1	12	complement C3a receptor 1 [Source:HGNC Symbol;Acc:HGNC:1319]	protein_coding
ENSG00000198960	0.725123	4.63469	15.2128	0.00233721	0.0202254	ARMCX6	X	armadillo repeat containing X-linked 6 [Source:HGNC Symbol;Acc:HGNC:26094]	protein_coding
ENSG00000114346	-0.988611	5.54531	15.2065	0.00234051	0.0202281	ECT2	3	epithelial cell transforming 2 [Source:HGNC Symbol;Acc:HGNC:3155]	protein_coding
ENSG00000178409	-1.68614	1.95053	15.2066	0.00234046	0.0202281	BEND3	6	BEN domain containing 3 [Source:HGNC Symbol;Acc:HGNC:23040]	protein_coding
ENSG00000258289	0.745939	5.37799	15.1978	0.00234507	0.0202546	CHURC1	14	churchill domain containing 1 [Source:HGNC Symbol;Acc:HGNC:20099]	protein_coding
ENSG00000166831	1.82786	4.31367	15.1923	0.002348	0.0202671	RBPMS2	15	RNA binding protein, mRNA processing factor 2 [Source:HGNC Symbol;Acc:HGNC:19098]	protein_coding
ENSG00000160307	2.29738	3.04621	15.1619	0.00236411	0.0203931	S100B	21	S100 calcium binding protein B [Source:HGNC Symbol;Acc:HGNC:10500]	protein_coding
ENSG00000100644	0.647291	6.93571	15.1374	0.00237718	0.0204927	HIF1A	14	hypoxia inducible factor 1 subunit alpha [Source:HGNC Symbol;Acc:HGNC:4910]	protein_coding
ENSG00000154813	0.802648	5.4723	15.1307	0.00238076	0.0204975	DPH3	3	diphthamide biosynthesis 3 [Source:HGNC Symbol;Acc:HGNC:27717]	protein_coding
ENSG00000205238	-1.08874	1.52482	15.1329	0.00237962	0.0204975	SPDYE2	7	speedy/RINGO cell cycle regulator family member E2 [Source:HGNC Symbol;Acc:HGNC:33841]	protein_coding
ENSG00000058272	1.09038	7.61419	15.126	0.00238329	0.0205063	PPP1R12A	12	protein phosphatase 1 regulatory subunit 12A [Source:HGNC Symbol;Acc:HGNC:7618]	protein_coding
ENSG00000133706	-0.665101	8.11045	15.1097	0.0023921	0.0205691	LARS1	5	leucyl-tRNA synthetase 1 [Source:HGNC Symbol;Acc:HGNC:6512]	protein_coding
ENSG00000185559	3.1865	-0.913147	15.09	0.00240275	0.0206475	DLK1	14	delta like non-canonical Notch ligand 1 [Source:HGNC Symbol;Acc:HGNC:2907]	protein_coding
ENSG00000181045	2.56986	1.21593	15.0637	0.00241703	0.020757	SLC26A11	17	solute carrier family 26 member 11 [Source:HGNC Symbol;Acc:HGNC:14471]	protein_coding
ENSG00000007923	-0.570674	5.70682	15.0506	0.00242421	0.0208055	DNAJC11	1	DnaJ heat shock protein family (Hsp40) member C11 [Source:HGNC Symbol;Acc:HGNC:25570]	protein_coding
ENSG00000130816	-0.51971	7.71348	15.0338	0.00243346	0.0208679	DNMT1	19	DNA methyltransferase 1 [Source:HGNC Symbol;Acc:HGNC:2976]	protein_coding
ENSG00000134684	-0.603795	8.30118	15.0318	0.00243457	0.0208679	YARS1	1	tyrosyl-tRNA synthetase 1 [Source:HGNC Symbol;Acc:HGNC:12840]	protein_coding
ENSG00000187098	0.921722	4.57072	15.0233	0.00243922	0.0208946	MITF	3	melanocyte inducing transcription factor [Source:HGNC Symbol;Acc:HGNC:7105]	protein_coding
ENSG00000169116	6.60564	-0.394345	16.8776	0.002441	0.0208966	PARM1	4	prostate androgen-regulated mucin-like protein 1 [Source:HGNC Symbol;Acc:HGNC:24536]	protein_coding
ENSG00000154710	1.1455	2.78527	15.0063	0.00244865	0.0209489	RABGEF1	7	RAB guanine nucleotide exchange factor 1 [Source:HGNC Symbol;Acc:HGNC:17676]	protein_coding
ENSG00000119685	-0.914195	6.00464	14.9981	0.00245323	0.0209748	TTLL5	14	tubulin tyrosine ligase like 5 [Source:HGNC Symbol;Acc:HGNC:19963]	protein_coding
ENSG00000144535	-1.17056	4.68718	14.9928	0.00245616	0.0209866	DIS3L2	2	DIS3 like 3'-5' exoribonuclease 2 [Source:HGNC Symbol;Acc:HGNC:28648]	protein_coding
ENSG00000080822	1.72136	6.9556	14.9863	0.00245976	0.0209909	CLDND1	3	claudin domain containing 1 [Source:HGNC Symbol;Acc:HGNC:1322]	protein_coding
ENSG00000196605	0.966454	3.33783	14.9887	0.00245845	0.0209909	ZNF846	19	zinc finger protein 846 [Source:HGNC Symbol;Acc:HGNC:27260]	protein_coding
ENSG00000154240	-1.31695	1.06487	14.9716	0.00246797	0.0210344	CEP112	17	centrosomal protein 112 [Source:HGNC Symbol;Acc:HGNC:28514]	protein_coding
ENSG00000170619	0.865851	5.67879	14.9744	0.00246644	0.0210344	COMMD5	8	COMM domain containing 5 [Source:HGNC Symbol;Acc:HGNC:17902]	protein_coding
ENSG00000186522	5.90092	-0.271936	14.966	0.00247115	0.0210483	SEPTIN10	2	septin 10 [Source:HGNC Symbol;Acc:HGNC:14349]	protein_coding
ENSG00000116266	1.22975	6.80222	14.9545	0.00247756	0.0210896	STXBP3	1	syntaxin binding protein 3 [Source:HGNC Symbol;Acc:HGNC:11446]	protein_coding
ENSG00000101470	2.92491	-1.08601	14.9399	0.00248581	0.0211466	TNNC2	20	troponin C2, fast skeletal type [Source:HGNC Symbol;Acc:HGNC:11944]	protein_coding
ENSG00000004487	-0.582521	7.6444	14.9215	0.00249624	0.021222	KDM1A	1	lysine demethylase 1A [Source:HGNC Symbol;Acc:HGNC:29079]	protein_coding
ENSG00000072274	-1.5819	9.98525	14.9151	0.00249985	0.0212393	TFRC	3	transferrin receptor [Source:HGNC Symbol;Acc:HGNC:11763]	protein_coding
ENSG00000172086	1.27038	5.79592	14.8892	0.00251465	0.0213383	KRCC1	2	lysine rich coiled-coil 1 [Source:HGNC Symbol;Acc:HGNC:28039]	protein_coding
ENSG00000235169	1.61145	2.43912	14.8902	0.00251409	0.0213383	SMIM1	1	small integral membrane protein 1 (Vel blood group) [Source:HGNC Symbol;Acc:HGNC:44204]	protein_coding
ENSG00000100678	-1.20685	2.84944	14.879	0.00252046	0.0213537	SLC8A3	14	solute carrier family 8 member A3 [Source:HGNC Symbol;Acc:HGNC:11070]	protein_coding
ENSG00000113369	1.2838	5.34176	14.8804	0.00251966	0.0213537	ARRDC3	5	arrestin domain containing 3 [Source:HGNC Symbol;Acc:HGNC:29263]	protein_coding
ENSG00000124786	0.635778	5.02982	14.8778	0.0025212	0.0213537	SLC35B3	6	solute carrier family 35 member B3 [Source:HGNC Symbol;Acc:HGNC:21601]	protein_coding
ENSG00000116237	-1.0021	6.02961	14.8723	0.00252433	0.0213669	ICMT	1	isoprenylcysteine carboxyl methyltransferase [Source:HGNC Symbol;Acc:HGNC:5350]	protein_coding
ENSG00000104427	2.31105	3.51475	14.8685	0.0025265	0.0213719	ZC2HC1A	8	zinc finger C2HC-type containing 1A [Source:HGNC Symbol;Acc:HGNC:24277]	protein_coding
ENSG00000154269	0.783746	5.76796	14.8652	0.00252841	0.0213747	ENPP3	6	ectonucleotide pyrophosphatase/phosphodiesterase 3 [Source:HGNC Symbol;Acc:HGNC:3358]	protein_coding
ENSG00000173530	1.74164	4.47114	14.8433	0.00254109	0.0214684	TNFRSF10D	8	TNF receptor superfamily member 10d [Source:HGNC Symbol;Acc:HGNC:11907]	protein_coding
ENSG00000172322	0.825556	7.39606	14.8389	0.00254363	0.0214685	CLEC12A	12	C-type lectin domain family 12 member A [Source:HGNC Symbol;Acc:HGNC:31713]	protein_coding
ENSG00000205133	0.77898	5.09801	14.8378	0.00254426	0.0214685	TRIQK	8	triple QxxK/R motif containing [Source:HGNC Symbol;Acc:HGNC:27828]	protein_coding
ENSG00000177034	-0.932117	3.1815	14.826	0.00255114	0.0215132	MTX3	5	metaxin 3 [Source:HGNC Symbol;Acc:HGNC:24812]	protein_coding
ENSG00000255374	-3.47442	-0.935153	14.8148	0.00255764	0.0215545	TAS2R43	12	taste 2 receptor member 43 [Source:HGNC Symbol;Acc:HGNC:18875]	protein_coding
ENSG00000169860	1.34943	5.41714	14.784	0.00257572	0.0216831	P2RY1	3	purinergic receptor P2Y1 [Source:HGNC Symbol;Acc:HGNC:8539]	protein_coding
ENSG00000173372	4.06281	0.872103	14.7833	0.0025761	0.0216831	C1QA	1	complement C1q A chain [Source:HGNC Symbol;Acc:HGNC:1241]	protein_coding
ENSG00000087245	1.60267	7.3691	14.7767	0.00258004	0.0216902	MMP2	16	matrix metallopeptidase 2 [Source:HGNC Symbol;Acc:HGNC:7166]	protein_coding
ENSG00000153162	3.00613	0.633369	14.7765	0.00258015	0.0216902	BMP6	6	bone morphogenetic protein 6 [Source:HGNC Symbol;Acc:HGNC:1073]	protein_coding
ENSG00000093167	0.819094	6.96677	14.7599	0.00258996	0.0217426	LRRFIP2	3	LRR binding FLII interacting protein 2 [Source:HGNC Symbol;Acc:HGNC:6703]	protein_coding
ENSG00000110848	2.33556	5.9454	14.7578	0.00259119	0.0217426	CD69	12	CD69 molecule [Source:HGNC Symbol;Acc:HGNC:1694]	protein_coding
ENSG00000121005	-0.867071	4.68663	14.758	0.00259109	0.0217426	CRISPLD1	8	cysteine rich secretory protein LCCL domain containing 1 [Source:HGNC Symbol;Acc:HGNC:18206]	protein_coding
ENSG00000056277	-1.41825	3.91963	14.7492	0.00259628	0.0217479	ZNF280C	X	zinc finger protein 280C [Source:HGNC Symbol;Acc:HGNC:25955]	protein_coding
ENSG00000100097	1.7248	9.24093	14.752	0.00259465	0.0217479	LGALS1	22	galectin 1 [Source:HGNC Symbol;Acc:HGNC:6561]	protein_coding
ENSG00000164604	-1.49823	2.36975	14.7486	0.00259665	0.0217479	GPR85	7	G protein-coupled receptor 85 [Source:HGNC Symbol;Acc:HGNC:4536]	protein_coding
ENSG00000087088	0.661551	7.15148	14.7404	0.00260153	0.0217754	BAX	19	BCL2 associated X, apoptosis regulator [Source:HGNC Symbol;Acc:HGNC:959]	protein_coding
ENSG00000107186	-1.34006	2.08482	14.7362	0.00260405	0.021783	MPDZ	9	multiple PDZ domain crumbs cell polarity complex component [Source:HGNC Symbol;Acc:HGNC:7208]	protein_coding
ENSG00000018280	1.28711	2.84707	14.7238	0.00261143	0.0218043	SLC11A1	2	solute carrier family 11 member 1 [Source:HGNC Symbol;Acc:HGNC:10907]	protein_coding
ENSG00000049130	4.24019	1.31308	14.7238	0.00261143	0.0218043	KITLG	12	KIT ligand [Source:HGNC Symbol;Acc:HGNC:6343]	protein_coding
ENSG00000157191	0.687603	6.58201	14.7264	0.00260987	0.0218043	NECAP2	1	NECAP endocytosis associated 2 [Source:HGNC Symbol;Acc:HGNC:25528]	protein_coding
ENSG00000152056	-1.39995	1.33085	14.721	0.00261313	0.021805	AP1S3	2	adaptor related protein complex 1 subunit sigma 3 [Source:HGNC Symbol;Acc:HGNC:18971]	protein_coding
ENSG00000148219	1.35721	1.81486	14.7099	0.00261977	0.0218336	ASTN2	9	astrotactin 2 [Source:HGNC Symbol;Acc:HGNC:17021]	protein_coding
ENSG00000163191	1.97752	8.64712	14.7125	0.00261823	0.0218336	S100A11	1	S100 calcium binding protein A11 [Source:HGNC Symbol;Acc:HGNC:10488]	protein_coding
ENSG00000071564	-1.37404	5.76168	14.6482	0.00265716	0.0221171	TCF3	19	transcription factor 3 [Source:HGNC Symbol;Acc:HGNC:11633]	protein_coding
ENSG00000106244	-0.912322	5.59157	14.6457	0.00265869	0.0221171	PDAP1	7	PDGFA associated protein 1 [Source:HGNC Symbol;Acc:HGNC:14634]	protein_coding
ENSG00000122188	0.914473	5.34117	14.6469	0.00265797	0.0221171	LAX1	1	lymphocyte transmembrane adaptor 1 [Source:HGNC Symbol;Acc:HGNC:26005]	protein_coding
ENSG00000010361	-0.986399	3.60799	14.635	0.00266526	0.0221501	FUZ	19	fuzzy planar cell polarity protein [Source:HGNC Symbol;Acc:HGNC:26219]	protein_coding
ENSG00000178980	0.664025	6.60633	14.6339	0.00266593	0.0221501	SELENOW	19	selenoprotein W [Source:HGNC Symbol;Acc:HGNC:10752]	protein_coding
ENSG00000169241	0.937367	7.04208	14.6217	0.00267339	0.0221985	SLC50A1	1	solute carrier family 50 member 1 [Source:HGNC Symbol;Acc:HGNC:30657]	protein_coding
ENSG00000121797	1.27285	4.87813	14.6155	0.00267723	0.0222168	CCRL2	3	C-C motif chemokine receptor like 2 [Source:HGNC Symbol;Acc:HGNC:1612]	protein_coding
ENSG00000149357	0.615924	7.27718	14.6128	0.00267888	0.0222168	LAMTOR1	11	late endosomal/lysosomal adaptor, MAPK and MTOR activator 1 [Source:HGNC Symbol;Acc:HGNC:26068]	protein_coding
ENSG00000105856	1.17587	6.18105	14.6086	0.00268149	0.0222188	HBP1	7	HMG-box transcription factor 1 [Source:HGNC Symbol;Acc:HGNC:23200]	protein_coding
ENSG00000154783	-1.40302	3.21025	14.6071	0.0026824	0.0222188	FGD5	3	FYVE, RhoGEF and PH domain containing 5 [Source:HGNC Symbol;Acc:HGNC:19117]	protein_coding
ENSG00000027001	-0.961598	4.96279	14.5977	0.00268824	0.0222444	MIPEP	13	mitochondrial intermediate peptidase [Source:HGNC Symbol;Acc:HGNC:7104]	protein_coding
ENSG00000110002	1.56715	7.90579	14.5911	0.00269231	0.0222444	VWA5A	11	von Willebrand factor A domain containing 5A [Source:HGNC Symbol;Acc:HGNC:6658]	protein_coding
ENSG00000113732	1.62593	8.32202	14.5935	0.00269083	0.0222444	ATP6V0E1	5	ATPase H+ transporting V0 subunit e1 [Source:HGNC Symbol;Acc:HGNC:863]	protein_coding
ENSG00000124767	0.728075	8.28698	14.5889	0.00269371	0.0222444	GLO1	6	glyoxalase I [Source:HGNC Symbol;Acc:HGNC:4323]	protein_coding
ENSG00000140939	2.15361	0.32451	14.5902	0.0026929	0.0222444	NOL3	16	nucleolar protein 3 [Source:HGNC Symbol;Acc:HGNC:7869]	protein_coding
ENSG00000105372	1.08273	10.6052	14.5851	0.00269607	0.0222504	RPS19	19	ribosomal protein S19 [Source:HGNC Symbol;Acc:HGNC:10402]	protein_coding
ENSG00000088882	-1.32178	7.54111	14.5808	0.00269874	0.0222588	CPXM1	20	carboxypeptidase X, M14 family member 1 [Source:HGNC Symbol;Acc:HGNC:15771]	protein_coding
ENSG00000033122	-2.16551	1.54826	14.5756	0.00270198	0.022272	LRRC7	1	leucine rich repeat containing 7 [Source:HGNC Symbol;Acc:HGNC:18531]	protein_coding
ENSG00000170425	1.09897	5.34746	14.5516	0.00271695	0.0223818	ADORA2B	17	adenosine A2b receptor [Source:HGNC Symbol;Acc:HGNC:264]	protein_coding
ENSG00000089154	-1.15036	6.94527	14.5296	0.00273081	0.0224823	GCN1	12	GCN1 activator of EIF2AK4 [Source:HGNC Symbol;Acc:HGNC:4199]	protein_coding
ENSG00000186767	-0.95178	5.84736	14.5256	0.00273335	0.0224895	SPIN4	X	spindlin family member 4 [Source:HGNC Symbol;Acc:HGNC:27040]	protein_coding
ENSG00000167635	-0.717591	7.03457	14.5199	0.00273695	0.0225054	ZNF146	19	zinc finger protein 146 [Source:HGNC Symbol;Acc:HGNC:12931]	protein_coding
ENSG00000011028	-1.82521	4.93227	14.4908	0.00275541	0.0225774	MRC2	17	mannose receptor C type 2 [Source:HGNC Symbol;Acc:HGNC:16875]	protein_coding
ENSG00000067064	0.952348	9.22495	14.5025	0.00274797	0.0225774	IDI1	10	isopentenyl-diphosphate delta isomerase 1 [Source:HGNC Symbol;Acc:HGNC:5387]	protein_coding
ENSG00000100916	0.890762	3.43421	14.4943	0.00275321	0.0225774	BRMS1L	14	BRMS1 like transcriptional repressor [Source:HGNC Symbol;Acc:HGNC:20512]	protein_coding
ENSG00000130590	-1.45693	3.76315	14.4904	0.0027557	0.0225774	SAMD10	20	sterile alpha motif domain containing 10 [Source:HGNC Symbol;Acc:HGNC:16129]	protein_coding
ENSG00000149294	-2.63034	0.577743	14.4971	0.00275139	0.0225774	NCAM1	11	neural cell adhesion molecule 1 [Source:HGNC Symbol;Acc:HGNC:7656]	protein_coding
ENSG00000196104	3.51346	-0.0968293	14.4945	0.00275308	0.0225774	SPOCK3	4	SPARC (osteonectin), cwcv and kazal like domains proteoglycan 3 [Source:HGNC Symbol;Acc:HGNC:13565]	protein_coding
ENSG00000010270	0.864154	6.9232	14.4854	0.00275889	0.0225899	STARD3NL	7	STARD3 N-terminal like [Source:HGNC Symbol;Acc:HGNC:19169]	protein_coding
ENSG00000114450	-0.600907	6.36991	14.4711	0.00276798	0.022637	GNB4	3	G protein subunit beta 4 [Source:HGNC Symbol;Acc:HGNC:20731]	protein_coding
ENSG00000148835	-0.756751	4.40394	14.4714	0.00276782	0.022637	TAF5	10	TATA-box binding protein associated factor 5 [Source:HGNC Symbol;Acc:HGNC:11539]	protein_coding
ENSG00000177646	-0.54034	6.09645	14.4588	0.0027759	0.0226757	ACAD9	3	acyl-CoA dehydrogenase family member 9 [Source:HGNC Symbol;Acc:HGNC:21497]	protein_coding
ENSG00000185414	-0.591228	5.75929	14.4586	0.00277607	0.0226757	MRPL30	2	mitochondrial ribosomal protein L30 [Source:HGNC Symbol;Acc:HGNC:14036]	protein_coding
ENSG00000049245	0.690714	6.30054	14.4342	0.00279177	0.0227444	VAMP3	1	vesicle associated membrane protein 3 [Source:HGNC Symbol;Acc:HGNC:12644]	protein_coding
ENSG00000148229	-0.546952	7.85324	14.4348	0.0027914	0.0227444	POLE3	9	DNA polymerase epsilon 3, accessory subunit [Source:HGNC Symbol;Acc:HGNC:13546]	protein_coding
ENSG00000164946	-1.31853	5.39137	14.4362	0.0027905	0.0227444	FREM1	9	FRAS1 related extracellular matrix 1 [Source:HGNC Symbol;Acc:HGNC:23399]	protein_coding
ENSG00000184445	-0.946857	6.05895	14.4325	0.00279287	0.0227444	KNTC1	12	kinetochore associated 1 [Source:HGNC Symbol;Acc:HGNC:17255]	protein_coding
ENSG00000225526	-2.48653	-0.782066	14.4335	0.00279226	0.0227444	MKRN2OS	3	MKRN2 opposite strand [Source:HGNC Symbol;Acc:HGNC:40375]	protein_coding
ENSG00000197872	1.31786	2.01834	14.4263	0.00279691	0.0227635	CYRIA	2	CYFIP related Rac1 interactor A [Source:HGNC Symbol;Acc:HGNC:25373]	protein_coding
ENSG00000170242	0.509264	7.1324	14.4129	0.00280562	0.0228207	USP47	11	ubiquitin specific peptidase 47 [Source:HGNC Symbol;Acc:HGNC:20076]	protein_coding
ENSG00000090971	-1.52177	3.26218	14.4065	0.00280981	0.0228284	NAT14	19	N-acetyltransferase 14 (putative) [Source:HGNC Symbol;Acc:HGNC:28918]	protein_coding
ENSG00000182809	2.74885	-0.0799019	14.4063	0.00280994	0.0228284	CRIP2	14	cysteine rich protein 2 [Source:HGNC Symbol;Acc:HGNC:2361]	protein_coding
ENSG00000197766	1.2575	7.19058	14.3711	0.00283301	0.0230021	CFD	19	complement factor D [Source:HGNC Symbol;Acc:HGNC:2771]	protein_coding
ENSG00000196998	0.752507	5.28553	14.3636	0.00283798	0.0230286	WDR45	X	WD repeat domain 45 [Source:HGNC Symbol;Acc:HGNC:28912]	protein_coding
ENSG00000067167	0.901534	9.00388	14.3521	0.00284554	0.0230761	TRAM1	8	translocation associated membrane protein 1 [Source:HGNC Symbol;Acc:HGNC:20568]	protein_coding
ENSG00000175591	-1.09438	5.13238	14.3424	0.00285197	0.0231144	P2RY2	11	purinergic receptor P2Y2 [Source:HGNC Symbol;Acc:HGNC:8541]	protein_coding
ENSG00000171848	-0.862442	7.76355	14.3379	0.00285497	0.0231249	RRM2	2	ribonucleotide reductase regulatory subunit M2 [Source:HGNC Symbol;Acc:HGNC:10452]	protein_coding
ENSG00000182389	1.74655	1.83658	14.3349	0.00285701	0.0231276	CACNB4	2	calcium voltage-gated channel auxiliary subunit beta 4 [Source:HGNC Symbol;Acc:HGNC:1404]	protein_coding
ENSG00000107537	0.69564	5.56909	14.3316	0.00285921	0.0231316	PHYH	10	phytanoyl-CoA 2-hydroxylase [Source:HGNC Symbol;Acc:HGNC:8940]	protein_coding
ENSG00000118707	-1.0073	5.52043	14.3227	0.00286509	0.0231653	TGIF2	20	TGFB induced factor homeobox 2 [Source:HGNC Symbol;Acc:HGNC:15764]	protein_coding
ENSG00000132581	1.10624	6.00346	14.3196	0.00286718	0.0231684	SDF2	17	stromal cell derived factor 2 [Source:HGNC Symbol;Acc:HGNC:10675]	protein_coding
ENSG00000156804	1.22799	2.14448	14.3104	0.00287333	0.0232042	FBXO32	8	F-box protein 32 [Source:HGNC Symbol;Acc:HGNC:16731]	protein_coding
ENSG00000101160	-0.89343	3.19892	14.3049	0.00287702	0.0232063	CTSZ	20	cathepsin Z [Source:HGNC Symbol;Acc:HGNC:2547]	protein_coding
ENSG00000125629	0.839305	5.69559	14.3059	0.00287634	0.0232063	INSIG2	2	insulin induced gene 2 [Source:HGNC Symbol;Acc:HGNC:20452]	protein_coding
ENSG00000107758	0.600078	4.2807	14.3008	0.0028798	0.0232133	PPP3CB	10	protein phosphatase 3 catalytic subunit beta [Source:HGNC Symbol;Acc:HGNC:9315]	protein_coding
ENSG00000116044	0.944576	7.28138	14.2985	0.00288131	0.0232133	NFE2L2	2	nuclear factor, erythroid 2 like 2 [Source:HGNC Symbol;Acc:HGNC:7782]	protein_coding
ENSG00000270885	-2.87181	0.537657	14.2933	0.00288486	0.0232281	RASL10B	17	RAS like family 10 member B [Source:HGNC Symbol;Acc:HGNC:30295]	protein_coding
ENSG00000138600	0.893033	6.58551	14.2871	0.00288901	0.0232365	SPPL2A	15	signal peptide peptidase like 2A [Source:HGNC Symbol;Acc:HGNC:30227]	protein_coding
ENSG00000198668	1.03397	8.63568	14.2841	0.00289105	0.0232365	CALM1	14	calmodulin 1 [Source:HGNC Symbol;Acc:HGNC:1442]	protein_coding
ENSG00000198826	-0.985312	5.99868	14.2843	0.00289087	0.0232365	ARHGAP11A	15	Rho GTPase activating protein 11A [Source:HGNC Symbol;Acc:HGNC:15783]	protein_coding
ENSG00000144395	-2.08149	2.90779	14.2525	0.00291247	0.0233948	CCDC150	2	coiled-coil domain containing 150 [Source:HGNC Symbol;Acc:HGNC:26834]	protein_coding
ENSG00000136514	1.62522	1.43366	14.241	0.00292027	0.0234296	RTP4	3	receptor transporter protein 4 [Source:HGNC Symbol;Acc:HGNC:23992]	protein_coding
ENSG00000160213	0.843058	7.83806	14.2419	0.00291969	0.0234296	CSTB	21	cystatin B [Source:HGNC Symbol;Acc:HGNC:2482]	protein_coding
ENSG00000173145	-0.781775	5.2568	14.2316	0.00292675	0.0234539	NOC3L	10	NOC3 like DNA replication regulator [Source:HGNC Symbol;Acc:HGNC:24034]	protein_coding
ENSG00000186399	-1.67167	0.501496	14.2325	0.00292613	0.0234539	GOLGA8R	15	golgin A8 family member R [Source:HGNC Symbol;Acc:HGNC:44407]	protein_coding
ENSG00000129515	0.815853	6.86509	14.2278	0.00292933	0.0234606	SNX6	14	sorting nexin 6 [Source:HGNC Symbol;Acc:HGNC:14970]	protein_coding
ENSG00000214787	1.71031	1.10063	14.2227	0.00293282	0.0234747	MS4A4E	11	membrane spanning 4-domains A4E [Source:HGNC Symbol;Acc:HGNC:14284]	protein_coding
ENSG00000139437	-0.751682	5.05701	14.1977	0.00295007	0.0235988	TCHP	12	trichoplein keratin filament binding [Source:HGNC Symbol;Acc:HGNC:28135]	protein_coding
ENSG00000092964	0.897562	6.84647	14.19	0.00295537	0.0236272	DPYSL2	8	dihydropyrimidinase like 2 [Source:HGNC Symbol;Acc:HGNC:3014]	protein_coding
ENSG00000077097	-0.634269	8.78612	14.1521	0.00298177	0.0237585	TOP2B	3	DNA topoisomerase II beta [Source:HGNC Symbol;Acc:HGNC:11990]	protein_coding
ENSG00000087157	0.524439	6.37455	14.1625	0.00297451	0.0237585	PGS1	17	phosphatidylglycerophosphate synthase 1 [Source:HGNC Symbol;Acc:HGNC:30029]	protein_coding
ENSG00000101109	0.548762	7.26544	14.1589	0.00297705	0.0237585	STK4	20	serine/threonine kinase 4 [Source:HGNC Symbol;Acc:HGNC:11408]	protein_coding
ENSG00000137269	-0.735973	3.07813	14.1541	0.00298034	0.0237585	LRRC1	6	leucine rich repeat containing 1 [Source:HGNC Symbol;Acc:HGNC:14307]	protein_coding
ENSG00000137449	1.34024	2.40895	14.1513	0.00298232	0.0237585	CPEB2	4	cytoplasmic polyadenylation element binding protein 2 [Source:HGNC Symbol;Acc:HGNC:21745]	protein_coding
ENSG00000179178	2.29933	-0.0457532	14.1543	0.00298021	0.0237585	TMEM125	1	transmembrane protein 125 [Source:HGNC Symbol;Acc:HGNC:28275]	protein_coding
ENSG00000139289	2.37223	1.05895	14.1293	0.0029978	0.0238678	PHLDA1	12	pleckstrin homology like domain family A member 1 [Source:HGNC Symbol;Acc:HGNC:8933]	protein_coding
ENSG00000265763	-2.15585	0.801355	14.1235	0.0030019	0.0238864	ZNF488	10	zinc finger protein 488 [Source:HGNC Symbol;Acc:HGNC:23535]	protein_coding
ENSG00000035720	1.0384	5.53954	14.1058	0.0030144	0.0239437	STAP1	4	signal transducing adaptor family member 1 [Source:HGNC Symbol;Acc:HGNC:24133]	protein_coding
ENSG00000160298	-1.03057	5.42858	14.1074	0.00301324	0.0239437	C21orf58	21	chromosome 21 open reading frame 58 [Source:HGNC Symbol;Acc:HGNC:1300]	protein_coding
ENSG00000162892	5.9062	0.240774	15.7756	0.00301155	0.0239437	IL24	1	interleukin 24 [Source:HGNC Symbol;Acc:HGNC:11346]	protein_coding
ENSG00000072858	1.61443	3.22131	14.0923	0.00302398	0.0239917	SIDT1	3	SID1 transmembrane family member 1 [Source:HGNC Symbol;Acc:HGNC:25967]	protein_coding
ENSG00000174456	1.10348	4.76798	14.0928	0.00302363	0.0239917	C12orf76	12	chromosome 12 open reading frame 76 [Source:HGNC Symbol;Acc:HGNC:33790]	protein_coding
ENSG00000188352	-1.16763	6.30935	14.0875	0.00302741	0.0240048	FOCAD	9	focadhesin [Source:HGNC Symbol;Acc:HGNC:23377]	protein_coding
ENSG00000186523	-2.90378	-0.011648	14.0723	0.00303825	0.0240767	FAM86B1	8	family with sequence similarity 86 member B1 [Source:HGNC Symbol;Acc:HGNC:28268]	protein_coding
ENSG00000081154	1.17248	7.73266	14.057	0.00304922	0.0241353	PCNP	3	PEST proteolytic signal containing nuclear protein [Source:HGNC Symbol;Acc:HGNC:30023]	protein_coding
ENSG00000167595	-0.974061	3.30881	14.0588	0.00304795	0.0241353	PROSER3	19	proline and serine rich 3 [Source:HGNC Symbol;Acc:HGNC:25204]	protein_coding
ENSG00000118508	1.46519	8.45854	14.0375	0.00306327	0.0242324	RAB32	6	RAB32, member RAS oncogene family [Source:HGNC Symbol;Acc:HGNC:9772]	protein_coding
ENSG00000128165	-3.16279	1.36709	14.0252	0.00307216	0.0242886	ADM2	22	adrenomedullin 2 [Source:HGNC Symbol;Acc:HGNC:28898]	protein_coding
ENSG00000005483	0.959152	7.12373	14.0142	0.00308017	0.0243234	KMT2E	7	lysine methyltransferase 2E (inactive) [Source:HGNC Symbol;Acc:HGNC:18541]	protein_coding
ENSG00000164935	2.88909	-0.213764	14.015	0.0030796	0.0243234	DCSTAMP	8	dendrocyte expressed seven transmembrane protein [Source:HGNC Symbol;Acc:HGNC:18549]	protein_coding
ENSG00000127863	-2.37565	2.22957	14.004	0.0030876	0.0243395	TNFRSF19	13	TNF receptor superfamily member 19 [Source:HGNC Symbol;Acc:HGNC:11915]	protein_coding
ENSG00000130723	-0.948229	5.67417	14.0058	0.00308633	0.0243395	PRRC2B	9	proline rich coiled-coil 2B [Source:HGNC Symbol;Acc:HGNC:28121]	protein_coding
ENSG00000141655	1.80491	3.68544	14.0069	0.00308547	0.0243395	TNFRSF11A	18	TNF receptor superfamily member 11a [Source:HGNC Symbol;Acc:HGNC:11908]	protein_coding
ENSG00000082438	-1.08489	3.70574	13.9999	0.00309059	0.0243489	COBLL1	2	cordon-bleu WH2 repeat protein like 1 [Source:HGNC Symbol;Acc:HGNC:23571]	protein_coding
ENSG00000105552	-0.83031	5.12463	13.9923	0.00309614	0.0243785	BCAT2	19	branched chain amino acid transaminase 2 [Source:HGNC Symbol;Acc:HGNC:977]	protein_coding
ENSG00000119048	1.03034	5.92873	13.9729	0.00311037	0.0244763	UBE2B	5	ubiquitin conjugating enzyme E2 B [Source:HGNC Symbol;Acc:HGNC:12473]	protein_coding
ENSG00000168995	2.13373	0.385159	13.9549	0.00312366	0.0245666	SIGLEC7	19	sialic acid binding Ig like lectin 7 [Source:HGNC Symbol;Acc:HGNC:10876]	protein_coding
ENSG00000063046	-0.555662	7.82673	13.9477	0.00312902	0.0245945	EIF4B	12	eukaryotic translation initiation factor 4B [Source:HGNC Symbol;Acc:HGNC:3285]	protein_coding
ENSG00000163466	1.44532	9.91866	13.942	0.00313326	0.0246116	ARPC2	2	actin related protein 2/3 complex subunit 2 [Source:HGNC Symbol;Acc:HGNC:705]	protein_coding
ENSG00000258405	1.06475	2.03229	13.9399	0.00313483	0.0246116	ZNF578	19	zinc finger protein 578 [Source:HGNC Symbol;Acc:HGNC:26449]	protein_coding
ENSG00000118596	0.710963	4.64461	13.9355	0.00313809	0.0246229	SLC16A7	12	solute carrier family 16 member 7 [Source:HGNC Symbol;Acc:HGNC:10928]	protein_coding
ENSG00000187837	0.932786	5.80947	13.932	0.00314064	0.0246287	H1-2	6	H1.2 linker histone, cluster member [Source:HGNC Symbol;Acc:HGNC:4716]	protein_coding
ENSG00000165244	-1.24397	4.65303	13.9261	0.00314506	0.024649	ZNF367	9	zinc finger protein 367 [Source:HGNC Symbol;Acc:HGNC:18320]	protein_coding
ENSG00000130724	1.01659	6.89207	13.9193	0.00315011	0.0246744	CHMP2A	19	charged multivesicular body protein 2A [Source:HGNC Symbol;Acc:HGNC:30216]	protein_coding
ENSG00000124209	0.755447	5.62921	13.9038	0.00316173	0.0247481	RAB22A	20	RAB22A, member RAS oncogene family [Source:HGNC Symbol;Acc:HGNC:9764]	protein_coding
ENSG00000186889	1.17598	2.74911	13.9019	0.00316318	0.0247481	TMEM17	2	transmembrane protein 17 [Source:HGNC Symbol;Acc:HGNC:26623]	protein_coding
ENSG00000130300	-3.15331	0.40071	13.879	0.00318042	0.0248686	PLVAP	19	plasmalemma vesicle associated protein [Source:HGNC Symbol;Acc:HGNC:13635]	protein_coding
ENSG00000123374	-0.702307	6.08021	13.87	0.00318722	0.0249074	CDK2	12	cyclin dependent kinase 2 [Source:HGNC Symbol;Acc:HGNC:1771]	protein_coding
ENSG00000249437	1.27848	2.596	13.8545	0.00319902	0.0249852	NAIP	5	NLR family apoptosis inhibitory protein [Source:HGNC Symbol;Acc:HGNC:7634]	protein_coding
ENSG00000108702	2.94148	-0.608672	13.8472	0.00320458	0.0249998	CCL1	17	C-C motif chemokine ligand 1 [Source:HGNC Symbol;Acc:HGNC:10609]	protein_coding
ENSG00000179409	-1.45579	6.37737	13.8481	0.00320383	0.0249998	GEMIN4	17	gem nuclear organelle associated protein 4 [Source:HGNC Symbol;Acc:HGNC:15717]	protein_coding
ENSG00000120253	-0.886031	5.27648	13.835	0.00321388	0.0250538	NUP43	6	nucleoporin 43 [Source:HGNC Symbol;Acc:HGNC:21182]	protein_coding
ENSG00000151657	0.948297	4.94426	13.8332	0.00321521	0.0250538	KIN	10	Kin17 DNA and RNA binding protein [Source:HGNC Symbol;Acc:HGNC:6327]	protein_coding
ENSG00000168685	3.39714	3.24373	13.827	0.00321999	0.0250767	IL7R	5	interleukin 7 receptor [Source:HGNC Symbol;Acc:HGNC:6024]	protein_coding
ENSG00000169057	0.558606	4.93659	13.815	0.00322919	0.0251339	MECP2	X	methyl-CpG binding protein 2 [Source:HGNC Symbol;Acc:HGNC:6990]	protein_coding
ENSG00000137942	1.1975	5.34061	13.8016	0.00323951	0.0251997	FNBP1L	1	formin binding protein 1 like [Source:HGNC Symbol;Acc:HGNC:20851]	protein_coding
ENSG00000139117	0.596465	4.67806	13.7967	0.00324334	0.025215	CPNE8	12	copine 8 [Source:HGNC Symbol;Acc:HGNC:23498]	protein_coding
ENSG00000137265	4.50265	0.0912667	13.794	0.00324544	0.0252169	IRF4	6	interferon regulatory factor 4 [Source:HGNC Symbol;Acc:HGNC:6119]	protein_coding
ENSG00000107175	1.35812	5.68523	13.7801	0.00325616	0.0252758	CREB3	9	cAMP responsive element binding protein 3 [Source:HGNC Symbol;Acc:HGNC:2347]	protein_coding
ENSG00000260314	2.28696	4.48332	13.7794	0.00325676	0.0252758	MRC1	10	mannose receptor C-type 1 [Source:HGNC Symbol;Acc:HGNC:7228]	protein_coding
ENSG00000135828	0.568275	5.00976	13.7716	0.0032628	0.0253082	RNASEL	1	ribonuclease L [Source:HGNC Symbol;Acc:HGNC:10050]	protein_coding
ENSG00000198399	0.623382	6.94336	13.7653	0.00326772	0.0253319	ITSN2	2	intersectin 2 [Source:HGNC Symbol;Acc:HGNC:6184]	protein_coding
ENSG00000164111	1.31688	7.16568	13.7598	0.003272	0.0253412	ANXA5	4	annexin A5 [Source:HGNC Symbol;Acc:HGNC:543]	protein_coding
ENSG00000172239	0.992013	6.12958	13.7589	0.00327267	0.0253412	PAIP1	5	poly(A) binding protein interacting protein 1 [Source:HGNC Symbol;Acc:HGNC:16945]	protein_coding
ENSG00000104983	-0.768951	3.32269	13.7561	0.00327487	0.0253437	CCDC61	19	coiled-coil domain containing 61 [Source:HGNC Symbol;Acc:HGNC:33629]	protein_coding
ENSG00000157796	-0.904429	4.35836	13.7374	0.00328954	0.0254282	WDR19	4	WD repeat domain 19 [Source:HGNC Symbol;Acc:HGNC:18340]	protein_coding
ENSG00000164609	0.768198	6.70458	13.7392	0.00328816	0.0254282	SLU7	5	SLU7 homolog, splicing factor [Source:HGNC Symbol;Acc:HGNC:16939]	protein_coding
ENSG00000107719	-1.63095	3.29818	13.7348	0.00329157	0.0254294	PALD1	10	phosphatase domain containing paladin 1 [Source:HGNC Symbol;Acc:HGNC:23530]	protein_coding
ENSG00000181061	1.76653	6.72303	13.732	0.00329382	0.0254323	HIGD1A	3	HIG1 hypoxia inducible domain family member 1A [Source:HGNC Symbol;Acc:HGNC:29527]	protein_coding
ENSG00000130396	1.17759	2.2711	13.7258	0.00329871	0.0254432	AFDN	6	afadin, adherens junction formation factor [Source:HGNC Symbol;Acc:HGNC:7137]	protein_coding
ENSG00000134996	0.603157	6.21244	13.7254	0.003299	0.0254432	OSTF1	9	osteoclast stimulating factor 1 [Source:HGNC Symbol;Acc:HGNC:8510]	protein_coding
ENSG00000169621	1.03521	4.23067	13.7085	0.00331234	0.0255171	APLF	2	aprataxin and PNKP like factor [Source:HGNC Symbol;Acc:HGNC:28724]	protein_coding
ENSG00000214063	0.655216	5.67736	13.7102	0.00331101	0.0255171	TSPAN4	11	tetraspanin 4 [Source:HGNC Symbol;Acc:HGNC:11859]	protein_coding
ENSG00000132965	2.5466	9.19135	13.6992	0.00331973	0.0255566	ALOX5AP	13	arachidonate 5-lipoxygenase activating protein [Source:HGNC Symbol;Acc:HGNC:436]	protein_coding
ENSG00000188626	-1.35544	1.26694	13.6973	0.00332125	0.0255566	GOLGA8M	15	golgin A8 family member M [Source:HGNC Symbol;Acc:HGNC:44404]	protein_coding
ENSG00000139974	1.54167	4.83291	13.6908	0.00332643	0.025582	SLC38A6	14	solute carrier family 38 member 6 [Source:HGNC Symbol;Acc:HGNC:19863]	protein_coding
ENSG00000142227	1.24554	7.72095	13.6856	0.00333055	0.0255991	EMP3	19	epithelial membrane protein 3 [Source:HGNC Symbol;Acc:HGNC:3335]	protein_coding
ENSG00000174197	-0.706897	6.2759	13.6756	0.00333859	0.0256464	MGA	15	MAX dimerization protein MGA [Source:HGNC Symbol;Acc:HGNC:14010]	protein_coding
ENSG00000077549	0.666831	7.84167	13.6606	0.00335056	0.0256806	CAPZB	1	capping actin protein of muscle Z-line subunit beta [Source:HGNC Symbol;Acc:HGNC:1491]	protein_coding
ENSG00000166343	-1.43146	2.01219	13.6674	0.00334513	0.0256806	MSS51	10	MSS51 mitochondrial translational activator [Source:HGNC Symbol;Acc:HGNC:21000]	protein_coding
ENSG00000198121	1.74313	1.09166	13.665	0.00334706	0.0256806	LPAR1	9	lysophosphatidic acid receptor 1 [Source:HGNC Symbol;Acc:HGNC:3166]	protein_coding
ENSG00000211695	2.56343	1.27531	13.6606	0.00335063	0.0256806	TRGV9	7	T cell receptor gamma variable 9 [Source:HGNC Symbol;Acc:HGNC:12295]	TR_V_gene
ENSG00000182621	-0.913339	4.11622	13.6485	0.00336037	0.0257407	PLCB1	20	phospholipase C beta 1 [Source:HGNC Symbol;Acc:HGNC:15917]	protein_coding
ENSG00000010292	-1.17142	7.55988	13.6274	0.00337744	0.0258568	NCAPD2	12	non-SMC condensin I complex subunit D2 [Source:HGNC Symbol;Acc:HGNC:24305]	protein_coding
ENSG00000110104	-0.814391	4.79675	13.618	0.003385	0.0259001	CCDC86	11	coiled-coil domain containing 86 [Source:HGNC Symbol;Acc:HGNC:28359]	protein_coding
ENSG00000108370	1.94954	0.520969	13.6094	0.00339201	0.025939	RGS9	17	regulator of G protein signaling 9 [Source:HGNC Symbol;Acc:HGNC:10004]	protein_coding
ENSG00000113119	-0.680707	3.52883	13.5966	0.00340252	0.0260036	TMCO6	5	transmembrane and coiled-coil domains 6 [Source:HGNC Symbol;Acc:HGNC:28814]	protein_coding
ENSG00000122641	2.95021	-0.490588	13.5944	0.0034043	0.0260036	INHBA	7	inhibin subunit beta A [Source:HGNC Symbol;Acc:HGNC:6066]	protein_coding
ENSG00000165650	-1.11483	6.74976	13.5878	0.00340972	0.0260304	PDZD8	10	PDZ domain containing 8 [Source:HGNC Symbol;Acc:HGNC:26974]	protein_coding
ENSG00000105997	-2.04808	0.254095	13.5844	0.00341246	0.0260366	HOXA3	7	homeobox A3 [Source:HGNC Symbol;Acc:HGNC:5104]	protein_coding
ENSG00000168495	-0.601825	4.84997	13.5773	0.00341831	0.0260666	POLR3D	8	RNA polymerase III subunit D [Source:HGNC Symbol;Acc:HGNC:1080]	protein_coding
ENSG00000159200	0.680149	5.48237	13.5674	0.00342646	0.026114	RCAN1	21	regulator of calcineurin 1 [Source:HGNC Symbol;Acc:HGNC:3040]	protein_coding
ENSG00000157693	-1.66674	3.41088	13.5619	0.00343105	0.0261343	TMEM268	9	transmembrane protein 268 [Source:HGNC Symbol;Acc:HGNC:24513]	protein_coding
ENSG00000146281	-1.66527	6.16424	13.5501	0.00344077	0.0261789	PM20D2	6	peptidase M20 domain containing 2 [Source:HGNC Symbol;Acc:HGNC:21408]	protein_coding
ENSG00000167740	0.861367	4.19343	13.5513	0.00343982	0.0261789	CYB5D2	17	cytochrome b5 domain containing 2 [Source:HGNC Symbol;Acc:HGNC:28471]	protein_coding
ENSG00000079739	-0.552681	6.63944	13.5345	0.00345373	0.0262627	PGM1	1	phosphoglucomutase 1 [Source:HGNC Symbol;Acc:HGNC:8905]	protein_coding
ENSG00000182544	0.636885	5.76758	13.5025	0.00348057	0.0264519	MFSD5	12	major facilitator superfamily domain containing 5 [Source:HGNC Symbol;Acc:HGNC:28156]	protein_coding
ENSG00000169375	-0.607073	5.83789	13.4906	0.00349051	0.0264978	SIN3A	15	SIN3 transcription regulator family member A [Source:HGNC Symbol;Acc:HGNC:19353]	protein_coding
ENSG00000204394	-1.75073	6.76972	13.4926	0.00348884	0.0264978	VARS1	6	valyl-tRNA synthetase 1 [Source:HGNC Symbol;Acc:HGNC:12651]	protein_coding
ENSG00000075886	-2.38208	0.155036	13.48	0.00349951	0.0265512	TUBA3D	2	tubulin alpha 3d [Source:HGNC Symbol;Acc:HGNC:24071]	protein_coding
ENSG00000123607	-0.789118	4.84295	13.4748	0.00350392	0.0265698	TTC21B	2	tetratricopeptide repeat domain 21B [Source:HGNC Symbol;Acc:HGNC:25660]	protein_coding
ENSG00000126602	-0.859449	5.62313	13.4693	0.00350858	0.0265902	TRAP1	16	TNF receptor associated protein 1 [Source:HGNC Symbol;Acc:HGNC:16264]	protein_coding
ENSG00000162408	-0.770502	5.09733	13.4599	0.00351651	0.0266354	NOL9	1	nucleolar protein 9 [Source:HGNC Symbol;Acc:HGNC:26265]	protein_coding
ENSG00000150471	4.49269	-1.23045	13.4521	0.00352316	0.0266708	ADGRL3	4	adhesion G protein-coupled receptor L3 [Source:HGNC Symbol;Acc:HGNC:20974]	protein_coding
ENSG00000106266	1.17304	4.74306	13.4423	0.00353159	0.0267198	SNX8	7	sorting nexin 8 [Source:HGNC Symbol;Acc:HGNC:14972]	protein_coding
ENSG00000134827	2.79613	4.24884	13.4379	0.00353533	0.0267209	TCN1	11	transcobalamin 1 [Source:HGNC Symbol;Acc:HGNC:11652]	protein_coding
ENSG00000183283	1.32097	9.28353	13.4375	0.00353569	0.0267209	DAZAP2	12	DAZ associated protein 2 [Source:HGNC Symbol;Acc:HGNC:2684]	protein_coding
ENSG00000163956	2.02541	9.56739	13.4295	0.00354255	0.0267578	LRPAP1	4	LDL receptor related protein associated protein 1 [Source:HGNC Symbol;Acc:HGNC:6701]	protein_coding
ENSG00000258102	1.22647	0.655207	13.4245	0.00354679	0.0267749	MAP1LC3B2	12	microtubule associated protein 1 light chain 3 beta 2 [Source:HGNC Symbol;Acc:HGNC:34390]	protein_coding
ENSG00000120942	-0.690856	5.18565	13.4201	0.0035506	0.0267887	UBIAD1	1	UbiA prenyltransferase domain containing 1 [Source:HGNC Symbol;Acc:HGNC:30791]	protein_coding
ENSG00000153404	-3.45725	-0.305611	13.4153	0.00355469	0.0268047	PLEKHG4B	5	pleckstrin homology and RhoGEF domain containing G4B [Source:HGNC Symbol;Acc:HGNC:29399]	protein_coding
ENSG00000138160	-0.987249	6.98337	13.4029	0.00356542	0.0268556	KIF11	10	kinesin family member 11 [Source:HGNC Symbol;Acc:HGNC:6388]	protein_coding
ENSG00000149932	0.871984	7.00646	13.4043	0.00356423	0.0268556	TMEM219	16	transmembrane protein 219 [Source:HGNC Symbol;Acc:HGNC:25201]	protein_coding
ENSG00000135968	1.18678	6.4745	13.3845	0.00358142	0.0269462	GCC2	2	GRIP and coiled-coil domain containing 2 [Source:HGNC Symbol;Acc:HGNC:23218]	protein_coding
ENSG00000160310	0.787155	7.23408	13.3861	0.00358004	0.0269462	PRMT2	21	protein arginine methyltransferase 2 [Source:HGNC Symbol;Acc:HGNC:5186]	protein_coding
ENSG00000164048	-0.812306	4.43046	13.3804	0.00358492	0.0269576	ZNF589	3	zinc finger protein 589 [Source:HGNC Symbol;Acc:HGNC:16747]	protein_coding
ENSG00000187051	1.11117	6.76615	13.3779	0.0035871	0.026959	RPS19BP1	22	ribosomal protein S19 binding protein 1 [Source:HGNC Symbol;Acc:HGNC:28749]	protein_coding
ENSG00000145740	0.649977	7.36648	13.3589	0.00360376	0.0270692	SLC30A5	5	solute carrier family 30 member 5 [Source:HGNC Symbol;Acc:HGNC:19089]	protein_coding
ENSG00000068654	-1.39683	5.01377	13.3506	0.003611	0.0270773	POLR1A	2	RNA polymerase I subunit A [Source:HGNC Symbol;Acc:HGNC:17264]	protein_coding
ENSG00000106789	-0.867352	5.65268	13.3502	0.00361139	0.0270773	CORO2A	9	coronin 2A [Source:HGNC Symbol;Acc:HGNC:2255]	protein_coding
ENSG00000107104	-1.78096	5.28851	13.3543	0.00360772	0.0270773	KANK1	9	KN motif and ankyrin repeat domains 1 [Source:HGNC Symbol;Acc:HGNC:19309]	protein_coding
ENSG00000203883	-2.91898	0.109764	13.3485	0.00361284	0.0270773	SOX18	20	SRY-box transcription factor 18 [Source:HGNC Symbol;Acc:HGNC:11194]	protein_coding
ENSG00000137656	-1.23365	5.09925	13.3459	0.00361518	0.0270798	BUD13	11	BUD13 homolog [Source:HGNC Symbol;Acc:HGNC:28199]	protein_coding
ENSG00000172638	0.951946	2.87542	13.3414	0.00361907	0.027094	EFEMP2	11	EGF containing fibulin extracellular matrix protein 2 [Source:HGNC Symbol;Acc:HGNC:3219]	protein_coding
ENSG00000116815	1.17695	6.0851	13.3366	0.00362335	0.0271111	CD58	1	CD58 molecule [Source:HGNC Symbol;Acc:HGNC:1688]	protein_coding
ENSG00000115053	-1.12545	9.92646	13.3272	0.00363165	0.0271582	NCL	2	nucleolin [Source:HGNC Symbol;Acc:HGNC:7667]	protein_coding
ENSG00000162819	1.14132	6.10928	13.3198	0.00363819	0.027192	BROX	1	BRO1 domain and CAAX motif containing [Source:HGNC Symbol;Acc:HGNC:26512]	protein_coding
ENSG00000141741	1.21005	6.01199	13.3119	0.00364514	0.027229	MIEN1	17	migration and invasion enhancer 1 [Source:HGNC Symbol;Acc:HGNC:28230]	protein_coding
ENSG00000071655	-1.08942	5.6862	13.3066	0.00364987	0.0272342	MBD3	19	methyl-CpG binding domain protein 3 [Source:HGNC Symbol;Acc:HGNC:6918]	protein_coding
ENSG00000138433	1.18419	5.4582	13.3076	0.00364903	0.0272342	CIR1	2	corepressor interacting with RBPJ, CIR1 [Source:HGNC Symbol;Acc:HGNC:24217]	protein_coding
ENSG00000132305	-0.556083	7.52448	13.283	0.0036709	0.0273611	IMMT	2	inner membrane mitochondrial protein [Source:HGNC Symbol;Acc:HGNC:6047]	protein_coding
ENSG00000158373	1.3757	2.51524	13.283	0.00367089	0.0273611	H2BC5	6	H2B clustered histone 5 [Source:HGNC Symbol;Acc:HGNC:4747]	protein_coding
ENSG00000124571	-1.23724	6.32341	13.2777	0.00367565	0.0273814	XPO5	6	exportin 5 [Source:HGNC Symbol;Acc:HGNC:17675]	protein_coding
ENSG00000166452	1.30037	5.34086	13.2592	0.0036923	0.0274903	AKIP1	11	A-kinase interacting protein 1 [Source:HGNC Symbol;Acc:HGNC:1170]	protein_coding
ENSG00000163703	0.602889	4.61973	13.2546	0.00369648	0.0275063	CRELD1	3	cysteine rich with EGF like domains 1 [Source:HGNC Symbol;Acc:HGNC:14630]	protein_coding
ENSG00000103494	-1.65772	3.21336	13.2418	0.00370805	0.0275737	RPGRIP1L	16	RPGRIP1 like [Source:HGNC Symbol;Acc:HGNC:29168]	protein_coding
ENSG00000154654	-2.36179	0.921727	13.2401	0.00370961	0.0275737	NCAM2	21	neural cell adhesion molecule 2 [Source:HGNC Symbol;Acc:HGNC:7657]	protein_coding
ENSG00000184110	-0.975567	4.58382	13.2287	0.00371996	0.0276354	EIF3C	16	eukaryotic translation initiation factor 3 subunit C [Source:HGNC Symbol;Acc:HGNC:3279]	protein_coding
ENSG00000100055	0.923216	3.85465	13.2259	0.00372244	0.0276387	CYTH4	22	cytohesin 4 [Source:HGNC Symbol;Acc:HGNC:9505]	protein_coding
ENSG00000134318	0.74543	6.43749	13.2205	0.00372734	0.0276448	ROCK2	2	Rho associated coiled-coil containing protein kinase 2 [Source:HGNC Symbol;Acc:HGNC:10252]	protein_coding
ENSG00000178773	-1.41757	1.68762	13.2221	0.00372594	0.0276448	CPNE7	16	copine 7 [Source:HGNC Symbol;Acc:HGNC:2320]	protein_coding
ENSG00000206557	-2.77108	0.773103	13.2156	0.00373187	0.0276632	TRIM71	3	tripartite motif containing 71 [Source:HGNC Symbol;Acc:HGNC:32669]	protein_coding
ENSG00000197119	-1.25179	5.61534	13.2103	0.00373668	0.0276837	SLC25A29	14	solute carrier family 25 member 29 [Source:HGNC Symbol;Acc:HGNC:20116]	protein_coding
ENSG00000101639	-0.803249	5.3953	13.201	0.00374524	0.0277319	CEP192	18	centrosomal protein 192 [Source:HGNC Symbol;Acc:HGNC:25515]	protein_coding
ENSG00000106733	1.09514	4.17501	13.1975	0.00374845	0.0277406	NMRK1	9	nicotinamide riboside kinase 1 [Source:HGNC Symbol;Acc:HGNC:26057]	protein_coding
ENSG00000172236	2.68207	10.3197	13.1932	0.00375233	0.0277541	TPSAB1	16	tryptase alpha/beta 1 [Source:HGNC Symbol;Acc:HGNC:12019]	protein_coding
ENSG00000164096	0.986533	7.48823	13.1889	0.00375632	0.0277684	C4orf3	4	chromosome 4 open reading frame 3 [Source:HGNC Symbol;Acc:HGNC:19225]	protein_coding
ENSG00000066926	-0.781965	6.81934	13.1841	0.00376072	0.0277707	FECH	18	ferrochelatase [Source:HGNC Symbol;Acc:HGNC:3647]	protein_coding
ENSG00000167850	2.09381	3.39013	13.1851	0.0037598	0.0277707	CD300C	17	CD300c molecule [Source:HGNC Symbol;Acc:HGNC:19320]	protein_coding
ENSG00000137710	0.589319	5.96058	13.1748	0.00376928	0.0278187	RDX	11	radixin [Source:HGNC Symbol;Acc:HGNC:9944]	protein_coding
ENSG00000124570	1.09676	7.35795	13.1713	0.00377255	0.0278277	SERPINB6	6	serpin family B member 6 [Source:HGNC Symbol;Acc:HGNC:8950]	protein_coding
ENSG00000055211	0.706807	5.34441	13.1658	0.0037776	0.0278498	GINM1	6	glycoprotein integral membrane 1 [Source:HGNC Symbol;Acc:HGNC:21074]	protein_coding
ENSG00000166947	-2.04311	2.88593	13.1611	0.00378199	0.027867	EPB42	15	erythrocyte membrane protein band 4.2 [Source:HGNC Symbol;Acc:HGNC:3381]	protein_coding
ENSG00000130779	0.600028	6.08408	13.1569	0.00378584	0.0278802	CLIP1	12	CAP-Gly domain containing linker protein 1 [Source:HGNC Symbol;Acc:HGNC:10461]	protein_coding
ENSG00000125755	-0.979895	5.35046	13.1116	0.00382818	0.0281767	SYMPK	19	symplekin [Source:HGNC Symbol;Acc:HGNC:22935]	protein_coding
ENSG00000078589	1.13713	2.2467	13.1066	0.00383295	0.0281935	P2RY10	X	P2Y receptor family member 10 [Source:HGNC Symbol;Acc:HGNC:19906]	protein_coding
ENSG00000090889	-0.740933	5.54212	13.1048	0.00383464	0.0281935	KIF4A	X	kinesin family member 4A [Source:HGNC Symbol;Acc:HGNC:13339]	protein_coding
ENSG00000071051	1.42017	6.03979	13.1011	0.0038381	0.0282037	NCK2	2	NCK adaptor protein 2 [Source:HGNC Symbol;Acc:HGNC:7665]	protein_coding
ENSG00000165689	-0.77921	4.30417	13.0987	0.00384032	0.0282047	ENTR1	9	endosome associated trafficking regulator 1 [Source:HGNC Symbol;Acc:HGNC:10667]	protein_coding
ENSG00000106105	-0.599963	7.61329	13.0959	0.003843	0.0282091	GARS1	7	glycyl-tRNA synthetase 1 [Source:HGNC Symbol;Acc:HGNC:4162]	protein_coding
ENSG00000122824	-2.65411	0.481129	13.0805	0.00385762	0.028301	NUDT10	X	nudix hydrolase 10 [Source:HGNC Symbol;Acc:HGNC:17621]	protein_coding
ENSG00000115170	1.19363	4.51351	13.0756	0.00386224	0.0283043	ACVR1	2	activin A receptor type 1 [Source:HGNC Symbol;Acc:HGNC:171]	protein_coding
ENSG00000169248	3.64431	-0.759032	13.0775	0.00386045	0.0283043	CXCL11	4	C-X-C motif chemokine ligand 11 [Source:HGNC Symbol;Acc:HGNC:10638]	protein_coding
ENSG00000088992	0.580476	7.18013	13.0698	0.00386781	0.0283298	TESC	12	tescalcin [Source:HGNC Symbol;Acc:HGNC:26065]	protein_coding
ENSG00000133731	0.691165	5.68635	13.067	0.00387047	0.028334	IMPA1	8	inositol monophosphatase 1 [Source:HGNC Symbol;Acc:HGNC:6050]	protein_coding
ENSG00000137941	0.65136	5.6729	13.0596	0.00387747	0.0283699	TTLL7	1	tubulin tyrosine ligase like 7 [Source:HGNC Symbol;Acc:HGNC:26242]	protein_coding
ENSG00000116199	-0.62782	5.90118	13.0506	0.00388606	0.0284174	FAM20B	1	FAM20B glycosaminoglycan xylosylkinase [Source:HGNC Symbol;Acc:HGNC:23017]	protein_coding
ENSG00000101003	-1.84996	5.74798	13.0466	0.00388994	0.0284249	GINS1	20	GINS complex subunit 1 [Source:HGNC Symbol;Acc:HGNC:28980]	protein_coding
ENSG00000121851	1.52995	5.5083	13.043	0.00389339	0.0284249	POLR3GL	1	RNA polymerase III subunit G like [Source:HGNC Symbol;Acc:HGNC:28466]	protein_coding
ENSG00000182220	0.822588	8.56439	13.0438	0.00389266	0.0284249	ATP6AP2	X	ATPase H+ transporting accessory protein 2 [Source:HGNC Symbol;Acc:HGNC:18305]	protein_coding
ENSG00000156042	1.31851	0.461453	13.0287	0.00390709	0.0285095	CFAP70	10	cilia and flagella associated protein 70 [Source:HGNC Symbol;Acc:HGNC:30726]	protein_coding
ENSG00000117595	-2.79168	2.35903	13.0251	0.0039106	0.0285198	IRF6	1	interferon regulatory factor 6 [Source:HGNC Symbol;Acc:HGNC:6121]	protein_coding
ENSG00000086758	-0.609554	6.54912	13.02	0.00391549	0.0285401	HUWE1	X	HECT, UBA and WWE domain containing E3 ubiquitin protein ligase 1 [Source:HGNC Symbol;Acc:HGNC:30892]	protein_coding
ENSG00000095585	3.94082	-0.787559	13.0116	0.0039237	0.0285845	BLNK	10	B cell linker [Source:HGNC Symbol;Acc:HGNC:14211]	protein_coding
ENSG00000042286	1.16319	2.32003	13.0012	0.00393372	0.0286421	AIFM2	10	apoptosis inducing factor mitochondria associated 2 [Source:HGNC Symbol;Acc:HGNC:21411]	protein_coding
ENSG00000090432	0.692684	5.67372	12.9909	0.00394373	0.0286783	MUL1	1	mitochondrial E3 ubiquitin protein ligase 1 [Source:HGNC Symbol;Acc:HGNC:25762]	protein_coding
ENSG00000107331	-1.17405	4.94131	12.9924	0.00394225	0.0286783	ABCA2	9	ATP binding cassette subfamily A member 2 [Source:HGNC Symbol;Acc:HGNC:32]	protein_coding
ENSG00000167701	-3.25926	-0.603247	12.987	0.00394753	0.0286783	GPT	8	glutamic--pyruvic transaminase [Source:HGNC Symbol;Acc:HGNC:4552]	protein_coding
ENSG00000167780	-4.43029	-1.38074	12.9889	0.00394571	0.0286783	SOAT2	12	sterol O-acyltransferase 2 [Source:HGNC Symbol;Acc:HGNC:11178]	protein_coding
ENSG00000167965	-0.530771	5.82046	12.9852	0.00394928	0.0286783	MLST8	16	MTOR associated protein, LST8 homolog [Source:HGNC Symbol;Acc:HGNC:24825]	protein_coding
ENSG00000103091	-0.628807	5.69364	12.9785	0.00395588	0.028697	WDR59	16	WD repeat domain 59 [Source:HGNC Symbol;Acc:HGNC:25706]	protein_coding
ENSG00000244005	-0.556636	4.89773	12.9783	0.00395609	0.028697	NFS1	20	NFS1 cysteine desulfurase [Source:HGNC Symbol;Acc:HGNC:15910]	protein_coding
ENSG00000083720	-0.854969	6.54694	12.9731	0.00396113	0.0287028	OXCT1	5	3-oxoacid CoA-transferase 1 [Source:HGNC Symbol;Acc:HGNC:8527]	protein_coding
ENSG00000147894	0.794192	4.09759	12.9741	0.00396016	0.0287028	C9orf72	9	C9orf72-SMCR8 complex subunit [Source:HGNC Symbol;Acc:HGNC:28337]	protein_coding
ENSG00000137726	1.85953	0.184002	12.9698	0.00396442	0.0287113	FXYD6	11	FXYD domain containing ion transport regulator 6 [Source:HGNC Symbol;Acc:HGNC:4030]	protein_coding
ENSG00000105281	-1.40311	7.13284	12.9588	0.00397517	0.0287738	SLC1A5	19	solute carrier family 1 member 5 [Source:HGNC Symbol;Acc:HGNC:10943]	protein_coding
ENSG00000134853	2.746	-0.468909	12.9421	0.0039916	0.0288618	PDGFRA	4	platelet derived growth factor receptor alpha [Source:HGNC Symbol;Acc:HGNC:8803]	protein_coding
ENSG00000263465	0.569611	6.63696	12.9432	0.00399055	0.0288618	SRSF8	11	serine and arginine rich splicing factor 8 [Source:HGNC Symbol;Acc:HGNC:16988]	protein_coding
ENSG00000143442	-0.689078	5.28901	12.9343	0.00399938	0.0288918	POGZ	1	pogo transposable element derived with ZNF domain [Source:HGNC Symbol;Acc:HGNC:18801]	protein_coding
ENSG00000179152	0.543856	5.37997	12.9336	0.00400001	0.0288918	TCAIM	3	T cell activation inhibitor, mitochondrial [Source:HGNC Symbol;Acc:HGNC:25241]	protein_coding
ENSG00000132109	1.11451	5.88242	12.9294	0.00400421	0.0289067	TRIM21	11	tripartite motif containing 21 [Source:HGNC Symbol;Acc:HGNC:11312]	protein_coding
ENSG00000083844	-0.633997	3.68966	12.9238	0.00400982	0.0289314	ZNF264	19	zinc finger protein 264 [Source:HGNC Symbol;Acc:HGNC:13057]	protein_coding
ENSG00000188807	-1.35069	4.10685	12.9195	0.00401403	0.0289314	TMEM201	1	transmembrane protein 201 [Source:HGNC Symbol;Acc:HGNC:33719]	protein_coding
ENSG00000215012	-0.543184	4.68335	12.9206	0.00401293	0.0289314	RTL10	22	retrotransposon Gag like 10 [Source:HGNC Symbol;Acc:HGNC:26112]	protein_coding
ENSG00000168938	3.79462	0.61872	12.9166	0.00401695	0.028937	PPIC	5	peptidylprolyl isomerase C [Source:HGNC Symbol;Acc:HGNC:9256]	protein_coding
ENSG00000169193	1.24876	4.72414	12.9015	0.00403203	0.0290302	CCDC126	7	coiled-coil domain containing 126 [Source:HGNC Symbol;Acc:HGNC:22398]	protein_coding
ENSG00000116128	-1.01581	2.81254	12.8954	0.00403811	0.0290585	BCL9	1	BCL9 transcription coactivator [Source:HGNC Symbol;Acc:HGNC:1008]	protein_coding
ENSG00000168806	-0.782349	4.10424	12.8914	0.00404217	0.0290723	LCMT2	15	leucine carboxyl methyltransferase 2 [Source:HGNC Symbol;Acc:HGNC:17558]	protein_coding
ENSG00000196569	2.45807	-0.869032	12.8847	0.00404889	0.0291052	LAMA2	6	laminin subunit alpha 2 [Source:HGNC Symbol;Acc:HGNC:6482]	protein_coding
ENSG00000197785	-1.39262	5.2184	12.8733	0.00406034	0.029172	ATAD3A	1	ATPase family AAA domain containing 3A [Source:HGNC Symbol;Acc:HGNC:25567]	protein_coding
ENSG00000111344	2.5491	0.880609	12.8658	0.00406785	0.0292104	RASAL1	12	RAS protein activator like 1 [Source:HGNC Symbol;Acc:HGNC:9873]	protein_coding
ENSG00000120265	1.2783	8.48254	12.8577	0.00407606	0.0292539	PCMT1	6	protein-L-isoaspartate (D-aspartate) O-methyltransferase [Source:HGNC Symbol;Acc:HGNC:8728]	protein_coding
ENSG00000149600	1.44775	7.44191	12.8506	0.00408325	0.02929	COMMD7	20	COMM domain containing 7 [Source:HGNC Symbol;Acc:HGNC:16223]	protein_coding
ENSG00000184730	1.0178	3.43711	12.8438	0.00409024	0.0293246	APOBR	16	apolipoprotein B receptor [Source:HGNC Symbol;Acc:HGNC:24087]	protein_coding
ENSG00000089280	-0.974235	8.04778	12.833	0.00410121	0.0293877	FUS	16	FUS RNA binding protein [Source:HGNC Symbol;Acc:HGNC:4010]	protein_coding
ENSG00000051341	-0.935996	5.90622	12.8252	0.00410913	0.0294133	POLQ	3	DNA polymerase theta [Source:HGNC Symbol;Acc:HGNC:9186]	protein_coding
ENSG00000135241	0.549963	6.01368	12.8257	0.00410866	0.0294133	PNPLA8	7	patatin like phospholipase domain containing 8 [Source:HGNC Symbol;Acc:HGNC:28900]	protein_coding
ENSG00000135077	0.864274	4.03948	12.8221	0.00411239	0.0294211	HAVCR2	5	hepatitis A virus cellular receptor 2 [Source:HGNC Symbol;Acc:HGNC:18437]	protein_coding
ENSG00000099991	-1.09383	4.57106	12.8163	0.00411824	0.0294474	CABIN1	22	calcineurin binding protein 1 [Source:HGNC Symbol;Acc:HGNC:24187]	protein_coding
ENSG00000143612	0.599372	7.99218	12.7949	0.00414026	0.0295892	C1orf43	1	chromosome 1 open reading frame 43 [Source:HGNC Symbol;Acc:HGNC:29876]	protein_coding
ENSG00000186496	1.56914	2.02335	12.7891	0.00414624	0.0296163	ZNF396	18	zinc finger protein 396 [Source:HGNC Symbol;Acc:HGNC:18824]	protein_coding
ENSG00000102401	0.619342	6.98195	12.7824	0.00415318	0.0296502	ARMCX3	X	armadillo repeat containing X-linked 3 [Source:HGNC Symbol;Acc:HGNC:24065]	protein_coding
ENSG00000122545	0.913015	8.57063	12.7703	0.00416579	0.0296933	SEPTIN7	7	septin 7 [Source:HGNC Symbol;Acc:HGNC:1717]	protein_coding
ENSG00000164713	0.890262	4.13205	12.7717	0.00416435	0.0296933	BRI3	7	brain protein I3 [Source:HGNC Symbol;Acc:HGNC:1109]	protein_coding
ENSG00000186073	-0.813459	3.50441	12.7733	0.00416267	0.0296933	C15orf41	15	chromosome 15 open reading frame 41 [Source:HGNC Symbol;Acc:HGNC:26929]	protein_coding
ENSG00000157570	2.46999	0.914219	12.7595	0.00417707	0.029758	TSPAN18	11	tetraspanin 18 [Source:HGNC Symbol;Acc:HGNC:20660]	protein_coding
ENSG00000086712	-0.58399	5.19489	12.752	0.00418481	0.0297975	TXLNG	X	taxilin gamma [Source:HGNC Symbol;Acc:HGNC:18578]	protein_coding
ENSG00000184357	-0.920583	3.75411	12.7273	0.00421072	0.0299663	H1-5	6	H1.5 linker histone, cluster member [Source:HGNC Symbol;Acc:HGNC:4719]	protein_coding
ENSG00000167325	-0.620596	7.72569	12.707	0.00423217	0.0301031	RRM1	11	ribonucleotide reductase catalytic subunit M1 [Source:HGNC Symbol;Acc:HGNC:10451]	protein_coding
ENSG00000102554	1.14181	3.28814	12.6928	0.00424724	0.0301944	KLF5	13	Kruppel like factor 5 [Source:HGNC Symbol;Acc:HGNC:6349]	protein_coding
ENSG00000123349	1.08304	7.91796	12.6888	0.00425149	0.0301996	PFDN5	12	prefoldin subunit 5 [Source:HGNC Symbol;Acc:HGNC:8869]	protein_coding
ENSG00000135763	-1.92331	4.50745	12.6869	0.00425356	0.0301996	URB2	1	URB2 ribosome biogenesis homolog [Source:HGNC Symbol;Acc:HGNC:28967]	protein_coding
ENSG00000148700	0.796862	6.97179	12.6859	0.00425466	0.0301996	ADD3	10	adducin 3 [Source:HGNC Symbol;Acc:HGNC:245]	protein_coding
ENSG00000124831	0.485735	7.60869	12.6714	0.00427005	0.030293	LRRFIP1	2	LRR binding FLII interacting protein 1 [Source:HGNC Symbol;Acc:HGNC:6702]	protein_coding
ENSG00000197471	-0.954839	8.25716	12.6636	0.0042784	0.0303364	SPN	16	sialophorin [Source:HGNC Symbol;Acc:HGNC:11249]	protein_coding
ENSG00000135314	-0.831495	3.50301	12.6592	0.0042832	0.0303386	KHDC1	6	KH domain containing 1 [Source:HGNC Symbol;Acc:HGNC:21366]	protein_coding
ENSG00000135723	1.21485	5.00456	12.6596	0.00428277	0.0303386	FHOD1	16	formin homology 2 domain containing 1 [Source:HGNC Symbol;Acc:HGNC:17905]	protein_coding
ENSG00000023318	0.782458	7.76854	12.6543	0.00428848	0.0303601	ERP44	9	endoplasmic reticulum protein 44 [Source:HGNC Symbol;Acc:HGNC:18311]	protein_coding
ENSG00000145386	-0.678398	7.22638	12.6495	0.00429364	0.0303675	CCNA2	4	cyclin A2 [Source:HGNC Symbol;Acc:HGNC:1578]	protein_coding
ENSG00000158769	1.09697	6.02199	12.6491	0.004294	0.0303675	F11R	1	F11 receptor [Source:HGNC Symbol;Acc:HGNC:14685]	protein_coding
ENSG00000065154	-0.557341	7.56929	12.6397	0.0043042	0.0304078	OAT	10	ornithine aminotransferase [Source:HGNC Symbol;Acc:HGNC:8091]	protein_coding
ENSG00000211456	0.775177	7.26642	12.6403	0.00430349	0.0304078	SACM1L	3	SAC1 like phosphatidylinositide phosphatase [Source:HGNC Symbol;Acc:HGNC:17059]	protein_coding
ENSG00000276966	1.28418	2.31552	12.6346	0.00430968	0.0304306	H4C5	6	H4 clustered histone 5 [Source:HGNC Symbol;Acc:HGNC:4790]	protein_coding
ENSG00000162604	1.2397	6.16215	12.6275	0.00431739	0.0304692	TM2D1	1	TM2 domain containing 1 [Source:HGNC Symbol;Acc:HGNC:24142]	protein_coding
ENSG00000134516	-1.14283	7.94065	12.6168	0.00432904	0.0305146	DOCK2	5	dedicator of cytokinesis 2 [Source:HGNC Symbol;Acc:HGNC:2988]	protein_coding
ENSG00000137073	-1.01708	6.04442	12.6172	0.00432863	0.0305146	UBAP2	9	ubiquitin associated protein 2 [Source:HGNC Symbol;Acc:HGNC:14185]	protein_coding
ENSG00000143494	-2.32199	1.00175	12.6154	0.00433058	0.0305146	VASH2	1	vasohibin 2 [Source:HGNC Symbol;Acc:HGNC:25723]	protein_coding
ENSG00000117475	0.943837	5.81403	12.5981	0.0043494	0.0306313	BLZF1	1	basic leucine zipper nuclear factor 1 [Source:HGNC Symbol;Acc:HGNC:1065]	protein_coding
ENSG00000164199	1.95445	-0.150567	12.5911	0.00435712	0.0306697	ADGRV1	5	adhesion G protein-coupled receptor V1 [Source:HGNC Symbol;Acc:HGNC:17416]	protein_coding
ENSG00000140299	0.550463	7.74496	12.5858	0.00436293	0.0306787	BNIP2	15	BCL2 interacting protein 2 [Source:HGNC Symbol;Acc:HGNC:1083]	protein_coding
ENSG00000149054	-1.18679	2.81803	12.5876	0.00436086	0.0306787	ZNF215	11	zinc finger protein 215 [Source:HGNC Symbol;Acc:HGNC:13007]	protein_coding
ENSG00000065883	-0.89069	5.9618	12.5773	0.00437228	0.0307285	CDK13	7	cyclin dependent kinase 13 [Source:HGNC Symbol;Acc:HGNC:1733]	protein_coding
ENSG00000075790	0.795525	6.75867	12.574	0.00437589	0.0307379	BCAP29	7	B cell receptor associated protein 29 [Source:HGNC Symbol;Acc:HGNC:24131]	protein_coding
ENSG00000130703	0.544114	5.38922	12.5535	0.00439852	0.0308648	OSBPL2	20	oxysterol binding protein like 2 [Source:HGNC Symbol;Acc:HGNC:15761]	protein_coding
ENSG00000182208	0.534595	4.1778	12.5553	0.00439653	0.0308648	MOB2	11	MOB kinase activator 2 [Source:HGNC Symbol;Acc:HGNC:24904]	protein_coding
ENSG00000129038	-1.65707	4.25333	12.5457	0.00440715	0.0309094	LOXL1	15	lysyl oxidase like 1 [Source:HGNC Symbol;Acc:HGNC:6665]	protein_coding
ENSG00000118680	0.744322	8.98133	12.5432	0.00440998	0.0309132	MYL12B	18	myosin light chain 12B [Source:HGNC Symbol;Acc:HGNC:29827]	protein_coding
ENSG00000121900	3.60562	-0.192107	12.5388	0.00441486	0.0309314	TMEM54	1	transmembrane protein 54 [Source:HGNC Symbol;Acc:HGNC:24143]	protein_coding
ENSG00000006638	2.73239	3.85885	12.5351	0.00441893	0.0309315	TBXA2R	19	thromboxane A2 receptor [Source:HGNC Symbol;Acc:HGNC:11608]	protein_coding
ENSG00000165669	0.855877	6.14126	12.5347	0.00441944	0.0309315	FAM204A	10	family with sequence similarity 204 member A [Source:HGNC Symbol;Acc:HGNC:25794]	protein_coding
ENSG00000139572	2.43409	0.71648	12.5205	0.00443531	0.0310265	GPR84	12	G protein-coupled receptor 84 [Source:HGNC Symbol;Acc:HGNC:4535]	protein_coding
ENSG00000175899	2.78123	2.7731	12.5145	0.00444198	0.0310572	A2M	12	alpha-2-macroglobulin [Source:HGNC Symbol;Acc:HGNC:7]	protein_coding
ENSG00000119965	0.790416	4.34089	12.5103	0.00444673	0.0310743	C10orf88	10	chromosome 10 open reading frame 88 [Source:HGNC Symbol;Acc:HGNC:25822]	protein_coding
ENSG00000143418	0.51598	7.60513	12.4999	0.00445838	0.0311396	CERS2	1	ceramide synthase 2 [Source:HGNC Symbol;Acc:HGNC:14076]	protein_coding
ENSG00000136273	0.70678	4.50501	12.4784	0.00448271	0.0312807	HUS1	7	HUS1 checkpoint clamp component [Source:HGNC Symbol;Acc:HGNC:5309]	protein_coding
ENSG00000162227	-0.563077	4.82389	12.478	0.00448319	0.0312807	TAF6L	11	TATA-box binding protein associated factor 6 like [Source:HGNC Symbol;Acc:HGNC:17305]	protein_coding
ENSG00000115919	1.59688	3.26454	12.4698	0.00449243	0.0313129	KYNU	2	kynureninase [Source:HGNC Symbol;Acc:HGNC:6469]	protein_coding
ENSG00000183520	0.904849	6.49201	12.4708	0.00449131	0.0313129	UTP11	1	UTP11 small subunit processome component [Source:HGNC Symbol;Acc:HGNC:24329]	protein_coding
ENSG00000125910	-1.11195	6.51853	12.4614	0.00450198	0.031348	S1PR4	19	sphingosine-1-phosphate receptor 4 [Source:HGNC Symbol;Acc:HGNC:3170]	protein_coding
ENSG00000257446	-2.50399	0.536235	12.4613	0.0045021	0.031348	ZNF878	19	zinc finger protein 878 [Source:HGNC Symbol;Acc:HGNC:37246]	protein_coding
ENSG00000128739	1.11571	5.37718	12.4563	0.00450788	0.0313608	SNRPN	15	small nuclear ribonucleoprotein polypeptide N [Source:HGNC Symbol;Acc:HGNC:11164]	protein_coding
ENSG00000160284	-0.86513	5.03428	12.4557	0.00450857	0.0313608	SPATC1L	21	spermatogenesis and centriole associated 1 like [Source:HGNC Symbol;Acc:HGNC:1298]	protein_coding
ENSG00000086730	0.897053	7.95419	12.4442	0.00452165	0.0314357	LAT2	7	linker for activation of T cells family member 2 [Source:HGNC Symbol;Acc:HGNC:12749]	protein_coding
ENSG00000198720	-1.94941	1.87402	12.4363	0.00453074	0.0314827	ANKRD13B	17	ankyrin repeat domain 13B [Source:HGNC Symbol;Acc:HGNC:26363]	protein_coding
ENSG00000169877	-1.90004	4.17606	12.4333	0.00453422	0.0314907	AHSP	16	alpha hemoglobin stabilizing protein [Source:HGNC Symbol;Acc:HGNC:18075]	protein_coding
ENSG00000198060	0.851787	5.96209	12.4296	0.00453849	0.0315043	MARCHF5	10	membrane associated ring-CH-type finger 5 [Source:HGNC Symbol;Acc:HGNC:26025]	protein_coding
ENSG00000027697	1.0207	6.83053	12.4108	0.00456012	0.0316219	IFNGR1	6	interferon gamma receptor 1 [Source:HGNC Symbol;Acc:HGNC:5439]	protein_coding
ENSG00000143774	1.11491	7.40072	12.4115	0.00455936	0.0316219	GUK1	1	guanylate kinase 1 [Source:HGNC Symbol;Acc:HGNC:4693]	protein_coding
ENSG00000103335	-1.72331	7.40582	12.3999	0.00457277	0.0316611	PIEZO1	16	piezo type mechanosensitive ion channel component 1 [Source:HGNC Symbol;Acc:HGNC:28993]	protein_coding
ENSG00000116954	0.629966	3.05977	12.4009	0.0045716	0.0316611	RRAGC	1	Ras related GTP binding C [Source:HGNC Symbol;Acc:HGNC:19902]	protein_coding
ENSG00000121716	-0.909963	3.50162	12.4008	0.00457167	0.0316611	PILRB	7	paired immunoglobin like type 2 receptor beta [Source:HGNC Symbol;Acc:HGNC:18297]	protein_coding
ENSG00000122966	-0.762756	5.04954	12.3952	0.00457825	0.0316828	CIT	12	citron rho-interacting serine/threonine kinase [Source:HGNC Symbol;Acc:HGNC:1985]	protein_coding
ENSG00000136731	-1.07275	6.87225	12.391	0.00458311	0.0317002	UGGT1	2	UDP-glucose glycoprotein glucosyltransferase 1 [Source:HGNC Symbol;Acc:HGNC:15663]	protein_coding
ENSG00000196230	-1.04023	9.48795	12.3877	0.00458696	0.0317107	TUBB	6	tubulin beta class I [Source:HGNC Symbol;Acc:HGNC:20778]	protein_coding
ENSG00000119969	-0.983493	6.56208	12.3793	0.00459676	0.0317622	HELLS	10	helicase, lymphoid specific [Source:HGNC Symbol;Acc:HGNC:4861]	protein_coding
ENSG00000173276	-0.919969	3.81125	12.3703	0.00460732	0.0318189	ZBTB21	21	zinc finger and BTB domain containing 21 [Source:HGNC Symbol;Acc:HGNC:13083]	protein_coding
ENSG00000143110	1.41966	6.82687	12.3678	0.00461022	0.0318228	C1orf162	1	chromosome 1 open reading frame 162 [Source:HGNC Symbol;Acc:HGNC:28344]	protein_coding
ENSG00000106392	0.686754	5.19776	12.361	0.00461814	0.0318573	C1GALT1	7	core 1 synthase, glycoprotein-N-acetylgalactosamine 3-beta-galactosyltransferase 1 [Source:HGNC Symbol;Acc:HGNC:24337]	protein_coding
ENSG00000184005	-3.79609	-0.182455	12.3595	0.00461994	0.0318573	ST6GALNAC3	1	ST6 N-acetylgalactosaminide alpha-2,6-sialyltransferase 3 [Source:HGNC Symbol;Acc:HGNC:19343]	protein_coding
ENSG00000146242	0.859707	3.94423	12.357	0.00462287	0.0318613	TPBG	6	trophoblast glycoprotein [Source:HGNC Symbol;Acc:HGNC:12004]	protein_coding
ENSG00000178295	-0.721457	5.12561	12.3508	0.00463011	0.031895	GEN1	2	GEN1 Holliday junction 5' flap endonuclease [Source:HGNC Symbol;Acc:HGNC:26881]	protein_coding
ENSG00000070495	0.968674	5.82807	12.3472	0.00463444	0.0319086	JMJD6	17	jumonji domain containing 6, arginine demethylase and lysine hydroxylase [Source:HGNC Symbol;Acc:HGNC:19355]	protein_coding
ENSG00000050130	1.49065	7.28148	12.3423	0.00464021	0.0319321	JKAMP	14	JNK1/MAPK8 associated membrane protein [Source:HGNC Symbol;Acc:HGNC:20184]	protein_coding
ENSG00000168374	0.975537	8.51022	12.34	0.00464291	0.0319344	ARF4	3	ADP ribosylation factor 4 [Source:HGNC Symbol;Acc:HGNC:655]	protein_coding
ENSG00000108021	-0.952799	5.07442	12.3285	0.00465649	0.0320011	TASOR2	10	transcription activation suppressor family member 2 [Source:HGNC Symbol;Acc:HGNC:23484]	protein_coding
ENSG00000150627	-1.46083	2.29973	12.3278	0.00465733	0.0320011	WDR17	4	WD repeat domain 17 [Source:HGNC Symbol;Acc:HGNC:16661]	protein_coding
ENSG00000165507	2.65008	1.42082	12.3233	0.00466266	0.0320215	DEPP1	10	DEPP1 autophagy regulator [Source:HGNC Symbol;Acc:HGNC:23355]	protein_coding
ENSG00000171928	1.44154	5.90114	12.3206	0.00466589	0.0320275	TVP23B	17	trans-golgi network vesicle protein 23 homolog B [Source:HGNC Symbol;Acc:HGNC:20399]	protein_coding
ENSG00000162607	-0.576729	6.90575	12.3109	0.0046774	0.0320739	USP1	1	ubiquitin specific peptidase 1 [Source:HGNC Symbol;Acc:HGNC:12607]	protein_coding
ENSG00000163220	1.54607	6.70878	12.311	0.00467728	0.0320739	S100A9	1	S100 calcium binding protein A9 [Source:HGNC Symbol;Acc:HGNC:10499]	protein_coding
ENSG00000167123	-1.20613	5.35606	12.3043	0.00468538	0.0321124	CERCAM	9	cerebral endothelial cell adhesion molecule [Source:HGNC Symbol;Acc:HGNC:23723]	protein_coding
ENSG00000122224	2.45993	-0.130591	12.2995	0.00469105	0.0321188	LY9	1	lymphocyte antigen 9 [Source:HGNC Symbol;Acc:HGNC:6730]	protein_coding
ENSG00000198513	0.638873	4.14379	12.2997	0.0046908	0.0321188	ATL1	14	atlastin GTPase 1 [Source:HGNC Symbol;Acc:HGNC:11231]	protein_coding
ENSG00000090316	0.677161	6.41979	12.2763	0.0047189	0.0322786	MAEA	4	macrophage erythroblast attacher, E3 ubiquitin ligase [Source:HGNC Symbol;Acc:HGNC:13731]	protein_coding
ENSG00000235162	1.01268	5.50216	12.2761	0.00471917	0.0322786	C12orf75	12	chromosome 12 open reading frame 75 [Source:HGNC Symbol;Acc:HGNC:35164]	protein_coding
ENSG00000135905	0.583349	5.9129	12.2621	0.00473601	0.0323775	DOCK10	2	dedicator of cytokinesis 10 [Source:HGNC Symbol;Acc:HGNC:23479]	protein_coding
ENSG00000140326	-0.922851	5.15292	12.2552	0.00474438	0.0324183	CDAN1	15	codanin 1 [Source:HGNC Symbol;Acc:HGNC:1713]	protein_coding
ENSG00000128915	-0.590919	6.283	12.2521	0.00474821	0.0324281	ICE2	15	interactor of little elongation complex ELL subunit 2 [Source:HGNC Symbol;Acc:HGNC:29885]	protein_coding
ENSG00000147854	-0.65949	5.89287	12.25	0.00475071	0.0324288	UHRF2	9	ubiquitin like with PHD and ring finger domains 2 [Source:HGNC Symbol;Acc:HGNC:12557]	protein_coding
ENSG00000154582	1.01815	6.51204	12.2465	0.00475502	0.0324365	ELOC	8	elongin C [Source:HGNC Symbol;Acc:HGNC:11617]	protein_coding
ENSG00000171451	1.44939	0.811441	12.2451	0.00475662	0.0324365	DSEL	18	dermatan sulfate epimerase like [Source:HGNC Symbol;Acc:HGNC:18144]	protein_coding
ENSG00000095303	1.48169	8.01086	12.2379	0.00476538	0.0324799	PTGS1	9	prostaglandin-endoperoxide synthase 1 [Source:HGNC Symbol;Acc:HGNC:9604]	protein_coding
ENSG00000119411	-0.741575	5.38323	12.2267	0.00477912	0.0325408	BSPRY	9	B-box and SPRY domain containing [Source:HGNC Symbol;Acc:HGNC:18232]	protein_coding
ENSG00000183682	-1.47168	1.61113	12.2277	0.00477794	0.0325408	BMP8A	1	bone morphogenetic protein 8a [Source:HGNC Symbol;Acc:HGNC:21650]	protein_coding
ENSG00000114520	0.717677	6.36191	12.2214	0.00478558	0.0325684	SNX4	3	sorting nexin 4 [Source:HGNC Symbol;Acc:HGNC:11175]	protein_coding
ENSG00000139835	2.13252	1.68515	12.2155	0.0047928	0.0325848	GRTP1	13	growth hormone regulated TBC protein 1 [Source:HGNC Symbol;Acc:HGNC:20310]	protein_coding
ENSG00000144566	0.536347	6.26653	12.2155	0.0047928	0.0325848	RAB5A	3	RAB5A, member RAS oncogene family [Source:HGNC Symbol;Acc:HGNC:9783]	protein_coding
ENSG00000134070	2.4026	3.29937	12.2063	0.00480414	0.0326455	IRAK2	3	interleukin 1 receptor associated kinase 2 [Source:HGNC Symbol;Acc:HGNC:6113]	protein_coding
ENSG00000221923	1.19374	4.10715	12.1967	0.00481601	0.0326934	ZNF880	19	zinc finger protein 880 [Source:HGNC Symbol;Acc:HGNC:37249]	protein_coding
ENSG00000260916	0.756602	4.20654	12.1986	0.00481366	0.0326934	CCPG1	15	cell cycle progression 1 [Source:HGNC Symbol;Acc:HGNC:24227]	protein_coding
ENSG00000103264	-1.31397	3.63183	12.1925	0.00482111	0.0327115	FBXO31	16	F-box protein 31 [Source:HGNC Symbol;Acc:HGNC:16510]	protein_coding
ENSG00000150977	0.493158	6.88604	12.186	0.00482919	0.03275	RILPL2	12	Rab interacting lysosomal protein like 2 [Source:HGNC Symbol;Acc:HGNC:28787]	protein_coding
ENSG00000011485	-1.00007	5.74731	12.1839	0.00483173	0.0327508	PPP5C	19	protein phosphatase 5 catalytic subunit [Source:HGNC Symbol;Acc:HGNC:9322]	protein_coding
ENSG00000198915	-1.65327	2.08803	12.1686	0.00485074	0.0328632	RASGEF1A	10	RasGEF domain family member 1A [Source:HGNC Symbol;Acc:HGNC:24246]	protein_coding
[truncated: 1,790 more rows]

## Sheet: Table S6 - RNAseq_GO_DEG
geneid	logFC	logCPM	F	PValue	FDR	hgnc_symbol	chromosome_name	description	gene_biotype
ENSG00000124762	3.84507	7.14847	341.427	6.59253e-11	8.85971e-07	CDKN1A	6	cyclin dependent kinase inhibitor 1A [Source:HGNC Symbol;Acc:HGNC:1784]	protein_coding
ENSG00000080546	1.57598	6.15454	238.119	6.62705e-10	4.05592e-06	SESN1	6	sestrin 1 [Source:HGNC Symbol;Acc:HGNC:21595]	protein_coding
ENSG00000134574	1.32262	6.57134	217.031	1.19278e-09	4.05592e-06	DDB2	11	damage specific DNA binding protein 2 [Source:HGNC Symbol;Acc:HGNC:2718]	protein_coding
ENSG00000172667	1.88109	5.50201	216.619	1.20721e-09	4.05592e-06	ZMAT3	3	zinc finger matrin-type 3 [Source:HGNC Symbol;Acc:HGNC:29983]	protein_coding
ENSG00000130513	4.03669	2.50014	199.245	2.04551e-09	4.98308e-06	GDF15	19	growth differentiation factor 15 [Source:HGNC Symbol;Acc:HGNC:30142]	protein_coding
ENSG00000161513	2.33019	4.93953	196.601	2.22475e-09	4.98308e-06	FDXR	17	ferredoxin reductase [Source:HGNC Symbol;Acc:HGNC:3642]	protein_coding
ENSG00000154767	1.14008	6.01646	190.842	2.68165e-09	5.14838e-06	XPC	3	XPC complex subunit, DNA damage recognition and repair factor [Source:HGNC Symbol;Acc:HGNC:12816]	protein_coding
ENSG00000185432	1.30427	6.75409	180.357	3.82069e-09	6.41828e-06	METTL7A	12	methyltransferase like 7A [Source:HGNC Symbol;Acc:HGNC:24550]	protein_coding
ENSG00000107796	2.21917	3.68737	176.406	4.388e-09	6.55226e-06	ACTA2	10	actin alpha 2, smooth muscle [Source:HGNC Symbol;Acc:HGNC:130]	protein_coding
ENSG00000145632	2.50529	3.74845	171.747	5.1855e-09	6.96879e-06	PLK2	5	polo like kinase 2 [Source:HGNC Symbol;Acc:HGNC:19699]	protein_coding
ENSG00000196576	1.36772	6.30208	168.12	5.92297e-09	7.23626e-06	PLXNB2	22	plexin B2 [Source:HGNC Symbol;Acc:HGNC:9104]	protein_coding
ENSG00000135679	1.83941	6.18039	155.554	9.59347e-09	1.07439e-05	MDM2	12	MDM2 proto-oncogene [Source:HGNC Symbol;Acc:HGNC:6973]	protein_coding
ENSG00000087088	1.0699	7.14762	147.172	1.35076e-08	1.39638e-05	BAX	19	BCL2 associated X, apoptosis regulator [Source:HGNC Symbol;Acc:HGNC:959]	protein_coding
ENSG00000169224	1.19102	7.88494	128.388	3.11987e-08	2.99485e-05	GCSAML	1	germinal center associated signaling and motility like [Source:HGNC Symbol;Acc:HGNC:29583]	protein_coding
ENSG00000120889	1.73493	6.19525	121.141	4.44155e-08	3.97933e-05	TNFRSF10B	8	TNF receptor superfamily member 10b [Source:HGNC Symbol;Acc:HGNC:11905]	protein_coding
ENSG00000151967	1.98194	3.82884	111.485	7.33567e-08	6.1615e-05	SCHIP1	3	schwannomin interacting protein 1 [Source:HGNC Symbol;Acc:HGNC:15678]	protein_coding
ENSG00000174307	2.75185	4.59578	109.322	8.25213e-08	6.52355e-05	PHLDA3	1	pleckstrin homology like domain family A member 3 [Source:HGNC Symbol;Acc:HGNC:8934]	protein_coding
ENSG00000117586	1.93424	3.50412	105.081	1.04598e-07	7.80941e-05	TNFSF4	1	TNF superfamily member 4 [Source:HGNC Symbol;Acc:HGNC:11934]	protein_coding
ENSG00000167992	1.85842	4.02847	102.963	1.18122e-07	8.35499e-05	VWCE	11	von Willebrand factor C and EGF domains [Source:HGNC Symbol;Acc:HGNC:26487]	protein_coding
ENSG00000181026	1.10304	5.93901	100.518	1.36315e-07	8.72348e-05	AEN	15	apoptosis enhancing nuclease [Source:HGNC Symbol;Acc:HGNC:25722]	protein_coding
ENSG00000254415	1.66762	4.21128	100.934	1.33002e-07	8.72348e-05	SIGLEC14	19	sialic acid binding Ig like lectin 14 [Source:HGNC Symbol;Acc:HGNC:32926]	protein_coding
ENSG00000159388	1.34812	5.98825	97.0668	1.67746e-07	0.00010247	BTG2	1	BTG anti-proliferation factor 2 [Source:HGNC Symbol;Acc:HGNC:1131]	protein_coding
ENSG00000184500	1.32342	6.01036	96.0126	1.78958e-07	0.000104566	PROS1	3	protein S [Source:HGNC Symbol;Acc:HGNC:9456]	protein_coding
ENSG00000087245	1.01843	7.1712	93.1144	2.14498e-07	0.000115306	MMP2	16	matrix metallopeptidase 2 [Source:HGNC Symbol;Acc:HGNC:7166]	protein_coding
ENSG00000173083	1.59527	6.02279	93.39	2.1079e-07	0.000115306	HPSE	4	heparanase [Source:HGNC Symbol;Acc:HGNC:5164]	protein_coding
ENSG00000055118	-0.909452	7.23523	88.0993	2.97041e-07	0.000153536	KCNH2	7	potassium voltage-gated channel subfamily H member 2 [Source:HGNC Symbol;Acc:HGNC:6251]	protein_coding
ENSG00000054148	0.822563	7.12862	86.6077	3.28273e-07	0.000159803	PHPT1	9	phosphohistidine phosphatase 1 [Source:HGNC Symbol;Acc:HGNC:30033]	protein_coding
ENSG00000164938	1.11012	6.45037	86.3986	3.32947e-07	0.000159803	TP53INP1	8	tumor protein p53 inducible nuclear protein 1 [Source:HGNC Symbol;Acc:HGNC:18022]	protein_coding
ENSG00000138678	1.03844	5.60043	85.8679	3.45156e-07	0.00015995	GPAT3	4	glycerol-3-phosphate acyltransferase 3 [Source:HGNC Symbol;Acc:HGNC:28157]	protein_coding
ENSG00000048392	0.993554	5.99564	84.911	3.68492e-07	0.000165072	RRM2B	8	ribonucleotide reductase regulatory TP53 inducible subunit M2B [Source:HGNC Symbol;Acc:HGNC:17296]	protein_coding
ENSG00000100298	3.25106	1.80184	84.3823	3.82162e-07	0.000165673	APOBEC3H	22	apolipoprotein B mRNA editing enzyme catalytic subunit 3H [Source:HGNC Symbol;Acc:HGNC:24100]	protein_coding
ENSG00000162783	0.811601	5.78654	82.3231	4.41265e-07	0.000185317	IER5	1	immediate early response 5 [Source:HGNC Symbol;Acc:HGNC:5393]	protein_coding
ENSG00000173530	1.84398	4.32354	81.4168	4.7056e-07	0.000191632	TNFRSF10D	8	TNF receptor superfamily member 10d [Source:HGNC Symbol;Acc:HGNC:11907]	protein_coding
ENSG00000059804	0.946902	7.64932	79.6316	5.35066e-07	0.000211493	SLC2A3	12	solute carrier family 2 member 3 [Source:HGNC Symbol;Acc:HGNC:11007]	protein_coding
ENSG00000168754	-3.62001	2.90924	78.9148	5.63786e-07	0.000216478	FAM178B	2	family with sequence similarity 178 member B [Source:HGNC Symbol;Acc:HGNC:28036]	protein_coding
ENSG00000196352	0.850551	7.47381	78.3248	5.88763e-07	0.000219788	CD55	1	CD55 molecule (Cromer blood group) [Source:HGNC Symbol;Acc:HGNC:2665]	protein_coding
ENSG00000125726	3.71228	1.38949	75.5391	7.25284e-07	0.000243677	CD70	19	CD70 molecule [Source:HGNC Symbol;Acc:HGNC:11937]	protein_coding
ENSG00000131080	3.02888	4.34761	75.6958	7.16703e-07	0.000243677	EDA2R	X	ectodysplasin A2 receptor [Source:HGNC Symbol;Acc:HGNC:17756]	protein_coding
ENSG00000132274	1.30107	6.65847	76.0299	6.98788e-07	0.000243677	TRIM22	11	tripartite motif containing 22 [Source:HGNC Symbol;Acc:HGNC:16379]	protein_coding
ENSG00000180071	-1.87479	2.90939	75.8215	7.09898e-07	0.000243677	ANKRD18A	9	ankyrin repeat domain 18A [Source:HGNC Symbol;Acc:HGNC:23643]	protein_coding
ENSG00000071575	-2.45561	3.19522	71.9489	9.58451e-07	0.000299549	TRIB2	2	tribbles pseudokinase 2 [Source:HGNC Symbol;Acc:HGNC:30809]	protein_coding
ENSG00000174233	1.20592	5.86302	72.3118	9.31326e-07	0.000299549	ADCY6	12	adenylate cyclase 6 [Source:HGNC Symbol;Acc:HGNC:237]	protein_coding
ENSG00000185088	1.32536	8.06913	72.0919	9.47656e-07	0.000299549	RPS27L	15	ribosomal protein S27 like [Source:HGNC Symbol;Acc:HGNC:18476]	protein_coding
ENSG00000026103	1.1808	4.67618	69.9263	1.12737e-06	0.000336681	FAS	10	Fas cell surface death receptor [Source:HGNC Symbol;Acc:HGNC:11920]	protein_coding
ENSG00000154188	1.04387	5.99151	70.0045	1.12023e-06	0.000336681	ANGPT1	8	angiopoietin 1 [Source:HGNC Symbol;Acc:HGNC:484]	protein_coding
ENSG00000075340	-2.18634	4.15241	67.6677	1.35791e-06	0.000375759	ADD2	2	adducin 2 [Source:HGNC Symbol;Acc:HGNC:244]	protein_coding
ENSG00000100234	0.930904	7.48861	67.8684	1.33536e-06	0.000375759	TIMP3	22	TIMP metallopeptidase inhibitor 3 [Source:HGNC Symbol;Acc:HGNC:11822]	protein_coding
ENSG00000102524	-0.891104	5.60843	67.0843	1.42598e-06	0.000375759	TNFSF13B	13	TNF superfamily member 13b [Source:HGNC Symbol;Acc:HGNC:11929]	protein_coding
ENSG00000125657	2.49063	1.70024	67.5471	1.37167e-06	0.000375759	TNFSF9	19	TNF superfamily member 9 [Source:HGNC Symbol;Acc:HGNC:11939]	protein_coding
ENSG00000128322	-1.33407	7.76694	67.2097	1.41102e-06	0.000375759	IGLL1	22	immunoglobulin lambda like polypeptide 1 [Source:HGNC Symbol;Acc:HGNC:5870]	protein_coding
ENSG00000271503	1.70443	3.44201	67.4099	1.38751e-06	0.000375759	CCL5	17	C-C motif chemokine ligand 5 [Source:HGNC Symbol;Acc:HGNC:10632]	protein_coding
ENSG00000169756	1.02129	7.95082	66.5765	1.48844e-06	0.000384677	LIMS1	2	LIM zinc finger domain containing 1 [Source:HGNC Symbol;Acc:HGNC:6616]	protein_coding
ENSG00000103522	2.00327	3.68911	65.5792	1.6205e-06	0.000404405	IL21R	16	interleukin 21 receptor [Source:HGNC Symbol;Acc:HGNC:6006]	protein_coding
ENSG00000170855	0.870602	6.24751	65.5471	1.62496e-06	0.000404405	TRIAP1	12	TP53 regulated inhibitor of apoptosis 1 [Source:HGNC Symbol;Acc:HGNC:26937]	protein_coding
ENSG00000162777	1.03875	4.89583	65.2482	1.66727e-06	0.000405261	DENND2D	1	DENN domain containing 2D [Source:HGNC Symbol;Acc:HGNC:26192]	protein_coding
ENSG00000185052	0.782598	5.31302	65.1	1.68871e-06	0.000405261	SLC24A3	20	solute carrier family 24 member 3 [Source:HGNC Symbol;Acc:HGNC:10977]	protein_coding
ENSG00000133101	1.25778	5.97737	64.0784	1.84545e-06	0.000435106	CCNA1	13	cyclin A1 [Source:HGNC Symbol;Acc:HGNC:1577]	protein_coding
ENSG00000153071	0.981292	5.62298	62.9583	2.03689e-06	0.000471962	DAB2	5	DAB adaptor protein 2 [Source:HGNC Symbol;Acc:HGNC:2662]	protein_coding
ENSG00000137801	1.66637	8.87372	62.2093	2.17766e-06	0.000496028	THBS1	15	thrombospondin 1 [Source:HGNC Symbol;Acc:HGNC:11785]	protein_coding
ENSG00000106366	1.92507	2.0671	61.7047	2.27881e-06	0.000509086	SERPINE1	7	serpin family E member 1 [Source:HGNC Symbol;Acc:HGNC:8583]	protein_coding
ENSG00000147872	1.15129	9.27213	61.5506	2.31076e-06	0.000509086	PLIN2	9	perilipin 2 [Source:HGNC Symbol;Acc:HGNC:248]	protein_coding
ENSG00000164741	0.642276	6.95505	60.3982	2.56678e-06	0.00054732	DLC1	8	DLC1 Rho GTPase activating protein [Source:HGNC Symbol;Acc:HGNC:2897]	protein_coding
ENSG00000168497	0.947801	7.47598	60.2726	2.59662e-06	0.00054732	CAVIN2	2	caveolae associated protein 2 [Source:HGNC Symbol;Acc:HGNC:10690]	protein_coding
ENSG00000173846	1.19596	3.96043	60.2314	2.60648e-06	0.00054732	PLK3	1	polo like kinase 3 [Source:HGNC Symbol;Acc:HGNC:2154]	protein_coding
ENSG00000023171	-1.23838	3.61855	59.9975	2.66334e-06	0.000550656	GRAMD1B	11	GRAM domain containing 1B [Source:HGNC Symbol;Acc:HGNC:29214]	protein_coding
ENSG00000011422	0.693346	5.41883	59.5381	2.77923e-06	0.000557464	PLAUR	19	plasminogen activator, urokinase receptor [Source:HGNC Symbol;Acc:HGNC:9053]	protein_coding
ENSG00000197959	1.24988	4.70344	59.5614	2.7732e-06	0.000557464	DNM3	1	dynamin 3 [Source:HGNC Symbol;Acc:HGNC:29125]	protein_coding
ENSG00000163737	1.4877	9.31198	59.1436	2.88338e-06	0.00056985	PF4	4	platelet factor 4 [Source:HGNC Symbol;Acc:HGNC:8861]	protein_coding
ENSG00000026508	0.83642	7.61238	58.3972	3.09297e-06	0.000602413	CD44	11	CD44 molecule (Indian blood group) [Source:HGNC Symbol;Acc:HGNC:1681]	protein_coding
ENSG00000100448	-1.44349	10.4442	58.2363	3.14044e-06	0.00060292	CTSG	14	cathepsin G [Source:HGNC Symbol;Acc:HGNC:2532]	protein_coding
ENSG00000183943	0.690045	6.32475	57.9819	3.21717e-06	0.000608952	PRKX	X	protein kinase X-linked [Source:HGNC Symbol;Acc:HGNC:9441]	protein_coding
ENSG00000135218	1.13277	8.11105	57.7096	3.30172e-06	0.000616275	CD36	7	CD36 molecule [Source:HGNC Symbol;Acc:HGNC:1663]	protein_coding
ENSG00000085733	1.37915	4.79875	57.163	3.47923e-06	0.000640512	CTTN	11	cortactin [Source:HGNC Symbol;Acc:HGNC:3338]	protein_coding
ENSG00000259207	1.91051	6.50401	56.0119	3.89023e-06	0.000706497	ITGB3	17	integrin subunit beta 3 [Source:HGNC Symbol;Acc:HGNC:6156]	protein_coding
ENSG00000196839	0.598839	7.05645	55.8167	3.96532e-06	0.000710532	ADA	20	adenosine deaminase [Source:HGNC Symbol;Acc:HGNC:186]	protein_coding
ENSG00000088826	1.00609	4.52843	55.1059	4.25324e-06	0.000752097	SMOX	20	spermine oxidase [Source:HGNC Symbol;Acc:HGNC:15862]	protein_coding
ENSG00000112249	0.817635	6.45155	54.5077	4.51429e-06	0.000777789	ASCC3	6	activating signal cointegrator 1 complex subunit 3 [Source:HGNC Symbol;Acc:HGNC:18697]	protein_coding
ENSG00000116717	0.88155	6.08373	54.5324	4.50317e-06	0.000777789	GADD45A	1	growth arrest and DNA damage inducible alpha [Source:HGNC Symbol;Acc:HGNC:4095]	protein_coding
ENSG00000102096	1.08503	6.45287	54.2761	4.6203e-06	0.000785978	PIM2	X	Pim-2 proto-oncogene, serine/threonine kinase [Source:HGNC Symbol;Acc:HGNC:8987]	protein_coding
ENSG00000182557	-1.44608	6.32004	53.9619	4.76868e-06	0.000801078	SPNS3	17	sphingolipid transporter 3 (putative) [Source:HGNC Symbol;Acc:HGNC:28433]	protein_coding
ENSG00000105327	1.69646	3.56849	53.4026	5.04661e-06	0.000817125	BBC3	19	BCL2 binding component 3 [Source:HGNC Symbol;Acc:HGNC:17868]	protein_coding
ENSG00000119862	1.60422	5.31918	53.5348	4.97929e-06	0.000817125	LGALSL	2	galectin like [Source:HGNC Symbol;Acc:HGNC:25012]	protein_coding
ENSG00000170542	0.930851	5.40905	53.424	5.03561e-06	0.000817125	SERPINB9	6	serpin family B member 9 [Source:HGNC Symbol;Acc:HGNC:8955]	protein_coding
ENSG00000148219	2.00816	1.74597	52.642	5.455e-06	0.000852439	ASTN2	9	astrotactin 2 [Source:HGNC Symbol;Acc:HGNC:17021]	protein_coding
ENSG00000158517	1.60522	2.96114	52.6989	5.42314e-06	0.000852439	NCF1	7	neutrophil cytosolic factor 1 [Source:HGNC Symbol;Acc:HGNC:7660]	protein_coding
ENSG00000163736	1.86536	9.35028	52.7656	5.38613e-06	0.000852439	PPBP	4	pro-platelet basic protein [Source:HGNC Symbol;Acc:HGNC:9240]	protein_coding
ENSG00000106327	-0.677237	6.81881	52.2604	5.67412e-06	0.000868779	TFR2	7	transferrin receptor 2 [Source:HGNC Symbol;Acc:HGNC:11762]	protein_coding
ENSG00000143416	-2.81178	1.4708	52.2298	5.6921e-06	0.000868779	SELENBP1	1	selenium binding protein 1 [Source:HGNC Symbol;Acc:HGNC:10719]	protein_coding
ENSG00000166482	-1.9816	4.83485	52.1263	5.75351e-06	0.000868779	MFAP4	17	microfibril associated protein 4 [Source:HGNC Symbol;Acc:HGNC:7035]	protein_coding
ENSG00000128294	0.703343	7.16144	51.7355	5.99228e-06	0.00089478	TPST2	22	tyrosylprotein sulfotransferase 2 [Source:HGNC Symbol;Acc:HGNC:12021]	protein_coding
ENSG00000185630	0.855112	4.42767	51.4797	6.15476e-06	0.000908944	PBX1	1	PBX homeobox 1 [Source:HGNC Symbol;Acc:HGNC:8632]	protein_coding
ENSG00000135926	0.645797	8.11278	51.2135	6.32921e-06	0.000924547	TMBIM1	2	transmembrane BAX inhibitor motif containing 1 [Source:HGNC Symbol;Acc:HGNC:23410]	protein_coding
ENSG00000130766	0.923699	5.10534	50.7276	6.66257e-06	0.000962778	SESN2	1	sestrin 2 [Source:HGNC Symbol;Acc:HGNC:20746]	protein_coding
ENSG00000144668	0.879418	4.97641	50.3531	6.93326e-06	0.000991235	ITGA9	3	integrin subunit alpha 9 [Source:HGNC Symbol;Acc:HGNC:6145]	protein_coding
ENSG00000016864	0.611065	6.99742	50.1723	7.06851e-06	0.000996634	GLT8D1	3	glycosyltransferase 8 domain containing 1 [Source:HGNC Symbol;Acc:HGNC:24870]	protein_coding
ENSG00000163171	0.778829	5.68254	50.1054	7.11935e-06	0.000996634	CDC42EP3	2	CDC42 effector protein 3 [Source:HGNC Symbol;Acc:HGNC:16943]	protein_coding
ENSG00000039068	-2.55635	4.48384	49.7025	7.43429e-06	0.00101061	CDH1	16	cadherin 1 [Source:HGNC Symbol;Acc:HGNC:1748]	protein_coding
ENSG00000077063	0.932738	5.20735	49.5962	7.52e-06	0.00101061	CTTNBP2	7	cortactin binding protein 2 [Source:HGNC Symbol;Acc:HGNC:15679]	protein_coding
ENSG00000088053	1.35593	4.87804	49.6527	7.47432e-06	0.00101061	GP6	19	glycoprotein VI platelet [Source:HGNC Symbol;Acc:HGNC:14388]	protein_coding
ENSG00000159339	1.24566	4.39218	49.6566	7.4712e-06	0.00101061	PADI4	1	peptidyl arginine deiminase 4 [Source:HGNC Symbol;Acc:HGNC:18368]	protein_coding
ENSG00000137672	1.41388	4.05093	49.135	7.90551e-06	0.0010519	TRPC6	11	transient receptor potential cation channel subfamily C member 6 [Source:HGNC Symbol;Acc:HGNC:12338]	protein_coding
ENSG00000000971	0.863915	5.80916	48.8648	8.14195e-06	0.00105211	CFH	1	complement factor H [Source:HGNC Symbol;Acc:HGNC:4883]	protein_coding
ENSG00000163947	0.983352	5.8315	48.8894	8.12007e-06	0.00105211	ARHGEF3	3	Rho guanine nucleotide exchange factor 3 [Source:HGNC Symbol;Acc:HGNC:683]	protein_coding
ENSG00000174175	1.40861	6.52694	48.8775	8.13064e-06	0.00105211	SELP	1	selectin P [Source:HGNC Symbol;Acc:HGNC:10721]	protein_coding
ENSG00000166091	1.13831	5.84201	48.7254	8.26708e-06	0.00105811	CMTM5	14	CKLF like MARVEL transmembrane domain containing 5 [Source:HGNC Symbol;Acc:HGNC:19176]	protein_coding
ENSG00000196072	0.556684	6.29424	48.5162	8.45894e-06	0.00107245	BLOC1S2	10	biogenesis of lysosomal organelles complex 1 subunit 2 [Source:HGNC Symbol;Acc:HGNC:20984]	protein_coding
ENSG00000184182	0.744512	5.536	48.3168	8.64669e-06	0.00108601	UBE2F	2	ubiquitin conjugating enzyme E2 F (putative) [Source:HGNC Symbol;Acc:HGNC:12480]	protein_coding
ENSG00000112576	0.824143	8.642	48.2219	8.73773e-06	0.00108606	CCND3	6	cyclin D3 [Source:HGNC Symbol;Acc:HGNC:1585]	protein_coding
ENSG00000197122	1.28702	4.58256	48.1487	8.80876e-06	0.00108606	SRC	20	SRC proto-oncogene, non-receptor tyrosine kinase [Source:HGNC Symbol;Acc:HGNC:11283]	protein_coding
ENSG00000010278	1.0293	7.38092	47.7744	9.18218e-06	0.00112181	CD9	12	CD9 molecule [Source:HGNC Symbol;Acc:HGNC:1709]	protein_coding
ENSG00000185245	1.3301	6.17534	47.5746	9.38897e-06	0.00113674	GP1BA	17	glycoprotein Ib platelet subunit alpha [Source:HGNC Symbol;Acc:HGNC:4439]	protein_coding
ENSG00000005469	1.1605	4.90841	47.41	9.56335e-06	0.00114752	CROT	7	carnitine O-octanoyltransferase [Source:HGNC Symbol;Acc:HGNC:2366]	protein_coding
ENSG00000065534	1.27782	5.64265	46.4164	1.06985e-05	0.00127237	MYLK	3	myosin light chain kinase [Source:HGNC Symbol;Acc:HGNC:7590]	protein_coding
ENSG00000134548	1.2139	4.06586	46.1129	1.10757e-05	0.00130567	SPX	12	spexin hormone [Source:HGNC Symbol;Acc:HGNC:28139]	protein_coding
ENSG00000181104	1.02656	7.54085	45.7471	1.15508e-05	0.00134983	F2R	5	coagulation factor II thrombin receptor [Source:HGNC Symbol;Acc:HGNC:3537]	protein_coding
ENSG00000113328	0.569103	8.4846	45.1808	1.23333e-05	0.00142885	CCNG1	5	cyclin G1 [Source:HGNC Symbol;Acc:HGNC:1592]	protein_coding
ENSG00000100439	0.764326	6.39169	45.0559	1.2514e-05	0.00143326	ABHD4	14	abhydrolase domain containing 4, N-acyl phospholipase B [Source:HGNC Symbol;Acc:HGNC:20154]	protein_coding
ENSG00000120594	0.892838	6.02147	45.0076	1.25846e-05	0.00143326	PLXDC2	10	plexin domain containing 2 [Source:HGNC Symbol;Acc:HGNC:21013]	protein_coding
ENSG00000162645	1.38655	3.87935	44.3171	1.3647e-05	0.0015412	GBP2	1	guanylate binding protein 2 [Source:HGNC Symbol;Acc:HGNC:4183]	protein_coding
ENSG00000146376	0.768888	5.89446	44.2154	1.38121e-05	0.00154684	ARHGAP18	6	Rho GTPase activating protein 18 [Source:HGNC Symbol;Acc:HGNC:21035]	protein_coding
ENSG00000146416	-0.790241	6.1099	43.8825	1.43687e-05	0.00159587	AIG1	6	androgen induced 1 [Source:HGNC Symbol;Acc:HGNC:21607]	protein_coding
ENSG00000110799	1.45759	6.72666	43.647	1.4778e-05	0.00162788	VWF	12	von Willebrand factor [Source:HGNC Symbol;Acc:HGNC:12726]	protein_coding
ENSG00000140859	0.932106	4.65045	43.4173	1.51902e-05	0.00165968	KIFC3	16	kinesin family member C3 [Source:HGNC Symbol;Acc:HGNC:6326]	protein_coding
ENSG00000101162	1.58715	6.15857	43.145	1.56961e-05	0.00170112	TUBB1	20	tubulin beta 1 class VI [Source:HGNC Symbol;Acc:HGNC:16257]	protein_coding
ENSG00000115129	0.876308	4.21873	42.6875	1.65903e-05	0.00173283	TP53I3	2	tumor protein p53 inducible protein 3 [Source:HGNC Symbol;Acc:HGNC:19373]	protein_coding
ENSG00000130208	-1.40931	4.23069	42.6662	1.66334e-05	0.00173283	APOC1	19	apolipoprotein C1 [Source:HGNC Symbol;Acc:HGNC:607]	protein_coding
ENSG00000169704	1.17209	6.10951	42.8448	1.62764e-05	0.00173283	GP9	3	glycoprotein IX platelet [Source:HGNC Symbol;Acc:HGNC:4444]	protein_coding
ENSG00000169877	-2.49518	4.44253	42.7174	1.65299e-05	0.00173283	AHSP	16	alpha hemoglobin stabilizing protein [Source:HGNC Symbol;Acc:HGNC:18075]	protein_coding
ENSG00000197852	1.60953	2.91364	42.8727	1.62214e-05	0.00173283	INKA2	1	inka box actin regulator 2 [Source:HGNC Symbol;Acc:HGNC:28045]	protein_coding
ENSG00000164181	0.792405	5.45269	42.5795	1.68098e-05	0.00173775	ELOVL7	5	ELOVL fatty acid elongase 7 [Source:HGNC Symbol;Acc:HGNC:26292]	protein_coding
ENSG00000170836	0.716741	5.35645	42.4262	1.71272e-05	0.00175704	PPM1D	17	protein phosphatase, Mg2+/Mn2+ dependent 1D [Source:HGNC Symbol;Acc:HGNC:9277]	protein_coding
ENSG00000026025	0.527212	7.90057	42.1586	1.7698e-05	0.00176274	VIM	10	vimentin [Source:HGNC Symbol;Acc:HGNC:12692]	protein_coding
ENSG00000077782	-1.28844	4.38419	42.2859	1.74237e-05	0.00176274	FGFR1	8	fibroblast growth factor receptor 1 [Source:HGNC Symbol;Acc:HGNC:3688]	protein_coding
ENSG00000164543	0.714976	5.9663	42.2737	1.74499e-05	0.00176274	STK17A	7	serine/threonine kinase 17a [Source:HGNC Symbol;Acc:HGNC:11395]	protein_coding
ENSG00000170734	0.742255	5.57718	42.1543	1.77074e-05	0.00176274	POLH	6	DNA polymerase eta [Source:HGNC Symbol;Acc:HGNC:9181]	protein_coding
ENSG00000075035	-1.64199	2.50018	42.0587	1.79165e-05	0.00176593	WSCD2	12	WSC domain containing 2 [Source:HGNC Symbol;Acc:HGNC:29117]	protein_coding
ENSG00000125730	3.1678	-0.557363	41.9773	1.8097e-05	0.00176593	C3	19	complement C3 [Source:HGNC Symbol;Acc:HGNC:1318]	protein_coding
ENSG00000143627	-2.38076	3.35415	41.9609	1.81336e-05	0.00176593	PKLR	1	pyruvate kinase L/R [Source:HGNC Symbol;Acc:HGNC:9020]	protein_coding
ENSG00000154217	0.935306	5.70425	41.6698	1.8798e-05	0.00181745	PITPNC1	17	phosphatidylinositol transfer protein cytoplasmic 1 [Source:HGNC Symbol;Acc:HGNC:21045]	protein_coding
ENSG00000143409	0.830707	5.13428	41.393	1.94555e-05	0.00186759	MINDY1	1	MINDY lysine 48 deubiquitinase 1 [Source:HGNC Symbol;Acc:HGNC:25648]	protein_coding
ENSG00000155366	0.747713	4.70528	41.3019	1.96778e-05	0.00187553	RHOC	1	ras homolog family member C [Source:HGNC Symbol;Acc:HGNC:669]	protein_coding
ENSG00000092621	-0.872448	7.28916	40.9406	2.05884e-05	0.00193824	PHGDH	1	phosphoglycerate dehydrogenase [Source:HGNC Symbol;Acc:HGNC:8923]	protein_coding
ENSG00000151065	0.633721	5.09094	40.9268	2.06242e-05	0.00193824	DCP1B	12	decapping mRNA 1B [Source:HGNC Symbol;Acc:HGNC:24451]	protein_coding
ENSG00000088836	2.81668	1.68694	40.6966	2.12307e-05	0.00195424	SLC4A11	20	solute carrier family 4 member 11 [Source:HGNC Symbol;Acc:HGNC:16438]	protein_coding
ENSG00000154127	0.747945	5.92401	40.7215	2.11642e-05	0.00195424	UBASH3B	11	ubiquitin associated and SH3 domain containing B [Source:HGNC Symbol;Acc:HGNC:29884]	protein_coding
ENSG00000196371	-0.961622	5.88057	40.775	2.10219e-05	0.00195424	FUT4	11	fucosyltransferase 4 [Source:HGNC Symbol;Acc:HGNC:4015]	protein_coding
ENSG00000105223	0.684319	7.6277	40.5495	2.1629e-05	0.00196511	PLD3	19	phospholipase D family member 3 [Source:HGNC Symbol;Acc:HGNC:17158]	protein_coding
ENSG00000113296	-1.73215	2.97672	40.4919	2.17874e-05	0.00196511	THBS4	5	thrombospondin 4 [Source:HGNC Symbol;Acc:HGNC:11788]	protein_coding
ENSG00000165682	1.11241	5.20608	40.5087	2.17411e-05	0.00196511	CLEC1B	12	C-type lectin domain family 1 member B [Source:HGNC Symbol;Acc:HGNC:24356]	protein_coding
ENSG00000160445	0.74744	6.09411	40.3644	2.21426e-05	0.00198287	ZER1	9	zyg-11 related cell cycle regulator [Source:HGNC Symbol;Acc:HGNC:30960]	protein_coding
ENSG00000164220	1.19246	4.04434	40.316	2.22794e-05	0.00198287	F2RL2	5	coagulation factor II thrombin receptor like 2 [Source:HGNC Symbol;Acc:HGNC:3539]	protein_coding
ENSG00000138722	1.23551	7.63281	40.2144	2.25692e-05	0.00199417	MMRN1	4	multimerin 1 [Source:HGNC Symbol;Acc:HGNC:7178]	protein_coding
ENSG00000142173	1.67881	2.87412	40.0393	2.3079e-05	0.00199417	COL6A2	21	collagen type VI alpha 2 chain [Source:HGNC Symbol;Acc:HGNC:2212]	protein_coding
ENSG00000167703	1.12103	3.53481	40.0571	2.30265e-05	0.00199417	SLC43A2	17	solute carrier family 43 member 2 [Source:HGNC Symbol;Acc:HGNC:23087]	protein_coding
ENSG00000198730	0.493843	7.63055	40.0159	2.31483e-05	0.00199417	CTR9	11	CTR9 homolog, Paf1/RNA polymerase II complex component [Source:HGNC Symbol;Acc:HGNC:16850]	protein_coding
ENSG00000198959	-1.91846	2.77164	40.0471	2.30562e-05	0.00199417	TGM2	20	transglutaminase 2 [Source:HGNC Symbol;Acc:HGNC:11778]	protein_coding
ENSG00000166123	-0.796129	6.38944	39.856	2.36273e-05	0.00202246	GPT2	16	glutamic--pyruvic transaminase 2 [Source:HGNC Symbol;Acc:HGNC:18062]	protein_coding
ENSG00000168685	1.7448	1.74043	39.7933	2.38181e-05	0.00202589	IL7R	5	interleukin 7 receptor [Source:HGNC Symbol;Acc:HGNC:6024]	protein_coding
ENSG00000124491	1.56018	8.22619	39.3912	2.50853e-05	0.00209378	F13A1	6	coagulation factor XIII A chain [Source:HGNC Symbol;Acc:HGNC:3531]	protein_coding
ENSG00000170476	-1.39781	5.98666	39.46	2.48628e-05	0.00209378	MZB1	5	marginal zone B and B1 cell specific protein [Source:HGNC Symbol;Acc:HGNC:30125]	protein_coding
ENSG00000172572	1.26204	4.05821	39.3439	2.52394e-05	0.00209378	PDE3A	12	phosphodiesterase 3A [Source:HGNC Symbol;Acc:HGNC:8778]	protein_coding
ENSG00000180530	0.630304	7.1471	39.3845	2.51068e-05	0.00209378	NRIP1	21	nuclear receptor interacting protein 1 [Source:HGNC Symbol;Acc:HGNC:8001]	protein_coding
ENSG00000111885	-1.01687	5.59746	39.1773	2.57907e-05	0.00212639	MAN1A1	6	mannosidase alpha class 1A member 1 [Source:HGNC Symbol;Acc:HGNC:6821]	protein_coding
ENSG00000136960	1.46864	6.5434	38.9549	2.65487e-05	0.00217553	ENPP2	8	ectonucleotide pyrophosphatase/phosphodiesterase 2 [Source:HGNC Symbol;Acc:HGNC:3357]	protein_coding
ENSG00000085514	0.79546	3.9869	38.8948	2.67581e-05	0.0021794	PILRA	7	paired immunoglobin like type 2 receptor alpha [Source:HGNC Symbol;Acc:HGNC:20396]	protein_coding
ENSG00000041353	1.09934	7.23161	38.7656	2.72142e-05	0.00219653	RAB27B	18	RAB27B, member RAS oncogene family [Source:HGNC Symbol;Acc:HGNC:9767]	protein_coding
ENSG00000142669	0.567447	9.35698	38.7246	2.73608e-05	0.00219653	SH3BGRL3	1	SH3 domain binding glutamate rich protein like 3 [Source:HGNC Symbol;Acc:HGNC:15568]	protein_coding
ENSG00000203710	1.36745	5.02012	38.6974	2.74586e-05	0.00219653	CR1	1	complement C3b/C4b receptor 1 (Knops blood group) [Source:HGNC Symbol;Acc:HGNC:2334]	protein_coding
ENSG00000070882	0.65538	5.96312	37.9182	3.04379e-05	0.00239213	OSBPL3	7	oxysterol binding protein like 3 [Source:HGNC Symbol;Acc:HGNC:16370]	protein_coding
ENSG00000119630	3.16468	1.1249	37.9438	3.03342e-05	0.00239213	PGF	14	placental growth factor [Source:HGNC Symbol;Acc:HGNC:8893]	protein_coding
ENSG00000160284	-0.647501	5.1904	38.0049	3.00888e-05	0.00239213	SPATC1L	21	spermatogenesis and centriole associated 1 like [Source:HGNC Symbol;Acc:HGNC:1298]	protein_coding
ENSG00000061918	0.870152	6.98737	37.8403	3.07558e-05	0.00239596	GUCY1B1	4	guanylate cyclase 1 soluble subunit beta 1 [Source:HGNC Symbol;Acc:HGNC:4687]	protein_coding
ENSG00000129038	-0.972205	4.48121	37.8052	3.09003e-05	0.00239596	LOXL1	15	lysyl oxidase like 1 [Source:HGNC Symbol;Acc:HGNC:6665]	protein_coding
ENSG00000155629	0.485154	7.65211	37.7759	3.10214e-05	0.00239596	PIK3AP1	10	phosphoinositide-3-kinase adaptor protein 1 [Source:HGNC Symbol;Acc:HGNC:30034]	protein_coding
ENSG00000076356	1.7579	2.83083	37.5401	3.20167e-05	0.0024587	PLXNA2	1	plexin A2 [Source:HGNC Symbol;Acc:HGNC:9100]	protein_coding
ENSG00000254087	0.462307	7.6544	37.4476	3.24172e-05	0.00247531	LYN	8	LYN proto-oncogene, Src family tyrosine kinase [Source:HGNC Symbol;Acc:HGNC:6735]	protein_coding
ENSG00000132256	0.707333	6.06818	37.3974	3.26368e-05	0.002478	TRIM5	11	tripartite motif containing 5 [Source:HGNC Symbol;Acc:HGNC:16276]	protein_coding
ENSG00000113924	1.59003	3.096	37.3277	3.29448e-05	0.00248733	HGD	3	homogentisate 1,2-dioxygenase [Source:HGNC Symbol;Acc:HGNC:4892]	protein_coding
ENSG00000160013	1.02115	3.37727	37.1902	3.35624e-05	0.0025198	PTGIR	19	prostaglandin I2 receptor [Source:HGNC Symbol;Acc:HGNC:9602]	protein_coding
ENSG00000196562	2.60056	3.40521	36.9711	3.45734e-05	0.00258129	SULF2	20	sulfatase 2 [Source:HGNC Symbol;Acc:HGNC:20392]	protein_coding
ENSG00000125257	0.784428	8.51594	36.8231	3.52768e-05	0.00261926	ABCC4	13	ATP binding cassette subfamily C member 4 [Source:HGNC Symbol;Acc:HGNC:55]	protein_coding
ENSG00000006638	1.7881	3.31493	36.6514	3.61128e-05	0.00263761	TBXA2R	19	thromboxane A2 receptor [Source:HGNC Symbol;Acc:HGNC:11608]	protein_coding
ENSG00000127533	0.811443	4.99292	36.6975	3.5886e-05	0.00263761	F2RL3	19	F2R like thrombin or trypsin receptor 3 [Source:HGNC Symbol;Acc:HGNC:3540]	protein_coding
ENSG00000137473	3.14274	0.717195	36.6722	3.60106e-05	0.00263761	TTC29	4	tetratricopeptide repeat domain 29 [Source:HGNC Symbol;Acc:HGNC:29936]	protein_coding
ENSG00000162599	-0.58511	5.63974	36.5572	3.65815e-05	0.0026574	NFIA	1	nuclear factor I A [Source:HGNC Symbol;Acc:HGNC:7784]	protein_coding
ENSG00000187513	1.59721	2.44052	36.4871	3.69346e-05	0.00266862	GJA4	1	gap junction protein alpha 4 [Source:HGNC Symbol;Acc:HGNC:4278]	protein_coding
ENSG00000135069	-1.67062	6.99617	36.3232	3.77759e-05	0.00271481	PSAT1	9	phosphoserine aminotransferase 1 [Source:HGNC Symbol;Acc:HGNC:19129]	protein_coding
ENSG00000184574	0.882935	5.68185	36.1283	3.88052e-05	0.00277395	LPAR5	12	lysophosphatidic acid receptor 5 [Source:HGNC Symbol;Acc:HGNC:13307]	protein_coding
ENSG00000115165	0.857669	4.11278	36.0282	3.93461e-05	0.00279774	CYTIP	2	cytohesin 1 interacting protein [Source:HGNC Symbol;Acc:HGNC:9506]	protein_coding
ENSG00000122786	1.42432	5.35124	35.6077	4.1716e-05	0.00295064	CALD1	7	caldesmon 1 [Source:HGNC Symbol;Acc:HGNC:1441]	protein_coding
ENSG00000117595	-2.08273	2.69164	35.3294	4.3375e-05	0.00304563	IRF6	1	interferon regulatory factor 6 [Source:HGNC Symbol;Acc:HGNC:6121]	protein_coding
ENSG00000197147	0.641326	5.45312	35.3069	4.35122e-05	0.00304563	LRRC8B	1	leucine rich repeat containing 8 VRAC subunit B [Source:HGNC Symbol;Acc:HGNC:30692]	protein_coding
ENSG00000093072	0.987608	5.87313	35.1697	4.43614e-05	0.00307306	ADA2	22	adenosine deaminase 2 [Source:HGNC Symbol;Acc:HGNC:1839]	protein_coding
ENSG00000171067	0.676442	5.26005	35.186	4.42592e-05	0.00307306	C11orf24	11	chromosome 11 open reading frame 24 [Source:HGNC Symbol;Acc:HGNC:1174]	protein_coding
ENSG00000160789	0.813693	7.90252	35.0478	4.51311e-05	0.00307876	LMNA	1	lamin A/C [Source:HGNC Symbol;Acc:HGNC:6636]	protein_coding
ENSG00000163071	5.14605	-1.06954	35.0977	4.48144e-05	0.00307876	SPATA18	4	spermatogenesis associated 18 [Source:HGNC Symbol;Acc:HGNC:29579]	protein_coding
ENSG00000196735	0.807373	4.5807	35.0571	4.50723e-05	0.00307876	HLA-DQA1	6	major histocompatibility complex, class II, DQ alpha 1 [Source:HGNC Symbol;Acc:HGNC:4942]	protein_coding
ENSG00000142875	0.558142	7.83996	34.8415	4.64701e-05	0.0031541	PRKACB	1	protein kinase cAMP-activated catalytic subunit beta [Source:HGNC Symbol;Acc:HGNC:9381]	protein_coding
ENSG00000101445	1.71144	3.07093	34.8009	4.67385e-05	0.00315638	PPP1R16B	20	protein phosphatase 1 regulatory subunit 16B [Source:HGNC Symbol;Acc:HGNC:15850]	protein_coding
ENSG00000131236	0.458509	8.0401	34.5573	4.83893e-05	0.00325152	CAP1	1	cyclase associated actin cytoskeleton regulatory protein 1 [Source:HGNC Symbol;Acc:HGNC:20040]	protein_coding
ENSG00000136732	-0.762308	7.74334	34.4643	4.90373e-05	0.00327867	GYPC	2	glycophorin C (Gerbich blood group) [Source:HGNC Symbol;Acc:HGNC:4704]	protein_coding
ENSG00000196188	-3.19701	-0.0785792	34.3607	4.97713e-05	0.00331127	CTSE	1	cathepsin E [Source:HGNC Symbol;Acc:HGNC:2530]	protein_coding
ENSG00000114541	0.75441	5.72704	34.1732	5.11306e-05	0.00338494	FRMD4B	3	FERM domain containing 4B [Source:HGNC Symbol;Acc:HGNC:24886]	protein_coding
ENSG00000077238	0.740235	5.69002	33.8928	5.3245e-05	0.00350764	IL4R	16	interleukin 4 receptor [Source:HGNC Symbol;Acc:HGNC:6015]	protein_coding
ENSG00000095303	0.765353	7.74648	33.6259	5.53519e-05	0.00362865	PTGS1	9	prostaglandin-endoperoxide synthase 1 [Source:HGNC Symbol;Acc:HGNC:9604]	protein_coding
ENSG00000130066	0.595582	8.36552	33.558	5.59028e-05	0.00363214	SAT1	X	spermidine/spermine N1-acetyltransferase 1 [Source:HGNC Symbol;Acc:HGNC:10540]	protein_coding
ENSG00000152689	0.817176	6.14963	33.5527	5.59457e-05	0.00363214	RASGRP3	2	RAS guanyl releasing protein 3 [Source:HGNC Symbol;Acc:HGNC:14545]	protein_coding
ENSG00000110031	0.560929	6.24788	33.3666	5.749e-05	0.00371446	LPXN	11	leupaxin [Source:HGNC Symbol;Acc:HGNC:14061]	protein_coding
ENSG00000027869	1.86156	2.73277	33.2521	5.84647e-05	0.00375936	SH2D2A	1	SH2 domain containing 2A [Source:HGNC Symbol;Acc:HGNC:10821]	protein_coding
ENSG00000128266	1.45079	3.21538	33.0002	6.06764e-05	0.0038729	GNAZ	22	G protein subunit alpha z [Source:HGNC Symbol;Acc:HGNC:4395]	protein_coding
ENSG00000142583	-1.10746	6.06842	32.9857	6.08067e-05	0.0038729	SLC2A5	1	solute carrier family 2 member 5 [Source:HGNC Symbol;Acc:HGNC:11010]	protein_coding
ENSG00000100321	-0.55866	6.9545	32.8777	6.17869e-05	0.00389837	SYNGR1	22	synaptogyrin 1 [Source:HGNC Symbol;Acc:HGNC:11498]	protein_coding
ENSG00000196586	2.15771	1.59821	32.8933	6.16438e-05	0.00389837	MYO6	6	myosin VI [Source:HGNC Symbol;Acc:HGNC:7605]	protein_coding
ENSG00000145246	0.626079	6.19837	32.7687	6.27945e-05	0.00394343	ATP10D	4	ATPase phospholipid transporting 10D (putative) [Source:HGNC Symbol;Acc:HGNC:13549]	protein_coding
ENSG00000127920	1.45417	4.65627	32.647	6.39423e-05	0.00398561	GNG11	7	G protein subunit gamma 11 [Source:HGNC Symbol;Acc:HGNC:4403]	protein_coding
ENSG00000148600	1.44657	3.69991	32.6347	6.40592e-05	0.00398561	CDHR1	10	cadherin related family member 1 [Source:HGNC Symbol;Acc:HGNC:14550]	protein_coding
ENSG00000155307	0.657304	7.09259	32.5315	6.50534e-05	0.00399202	SAMSN1	21	SAM domain, SH3 domain and nuclear localization signals 1 [Source:HGNC Symbol;Acc:HGNC:10528]	protein_coding
ENSG00000155966	-0.834631	3.71604	32.535	6.50193e-05	0.00399202	AFF2	X	AF4/FMR2 family member 2 [Source:HGNC Symbol;Acc:HGNC:3776]	protein_coding
ENSG00000162852	0.768448	6.94098	32.5678	6.47017e-05	0.00399202	CNST	1	consortin, connexin sorting protein [Source:HGNC Symbol;Acc:HGNC:26486]	protein_coding
ENSG00000158856	1.01888	4.46386	32.2363	6.79957e-05	0.00415361	DMTN	8	dematin actin binding protein [Source:HGNC Symbol;Acc:HGNC:3382]	protein_coding
ENSG00000144749	-1.02974	3.83409	32.144	6.89474e-05	0.00419269	LRIG1	3	leucine rich repeats and immunoglobulin like domains 1 [Source:HGNC Symbol;Acc:HGNC:17360]	protein_coding
ENSG00000110900	3.49154	-0.544435	32.083	6.95843e-05	0.00421236	TSPAN11	12	tetraspanin 11 [Source:HGNC Symbol;Acc:HGNC:30795]	protein_coding
ENSG00000047644	0.53586	5.21246	31.8942	7.15999e-05	0.00427744	WWC3	X	WWC family member 3 [Source:HGNC Symbol;Acc:HGNC:29237]	protein_coding
ENSG00000147650	0.753899	5.05532	31.9259	7.12568e-05	0.00427744	LRP12	8	LDL receptor related protein 12 [Source:HGNC Symbol;Acc:HGNC:31708]	protein_coding
ENSG00000178209	1.06208	4.52651	31.8929	7.16143e-05	0.00427744	PLEC	8	plectin [Source:HGNC Symbol;Acc:HGNC:9069]	protein_coding
ENSG00000105610	-0.629737	6.61892	31.7736	7.29231e-05	0.00433635	KLF1	19	Kruppel like factor 1 [Source:HGNC Symbol;Acc:HGNC:6345]	protein_coding
ENSG00000071054	0.556979	7.06	31.6399	7.44215e-05	0.00434848	MAP4K4	2	mitogen-activated protein kinase kinase kinase kinase 4 [Source:HGNC Symbol;Acc:HGNC:6866]	protein_coding
ENSG00000073849	0.537811	5.85362	31.6972	7.37749e-05	0.00434848	ST6GAL1	3	ST6 beta-galactoside alpha-2,6-sialyltransferase 1 [Source:HGNC Symbol;Acc:HGNC:10860]	protein_coding
ENSG00000138735	0.978621	4.36843	31.6612	7.41812e-05	0.00434848	PDE5A	4	phosphodiesterase 5A [Source:HGNC Symbol;Acc:HGNC:8784]	protein_coding
ENSG00000171236	-1.32975	4.75585	31.6408	7.44124e-05	0.00434848	LRG1	19	leucine rich alpha-2-glycoprotein 1 [Source:HGNC Symbol;Acc:HGNC:29480]	protein_coding
ENSG00000167460	0.607752	9.55114	31.4922	7.61193e-05	0.00442843	TPM4	19	tropomyosin 4 [Source:HGNC Symbol;Acc:HGNC:12013]	protein_coding
ENSG00000160145	1.17489	5.63074	31.3697	7.75617e-05	0.0044929	KALRN	3	kalirin RhoGEF kinase [Source:HGNC Symbol;Acc:HGNC:4814]	protein_coding
ENSG00000069966	0.983381	6.06729	31.28	7.86374e-05	0.00453566	GNB5	15	G protein subunit beta 5 [Source:HGNC Symbol;Acc:HGNC:4401]	protein_coding
ENSG00000239713	0.59047	4.80707	31.2164	7.941e-05	0.00456064	APOBEC3G	22	apolipoprotein B mRNA editing enzyme catalytic subunit 3G [Source:HGNC Symbol;Acc:HGNC:17357]	protein_coding
ENSG00000085721	0.488645	7.1496	30.955	8.26818e-05	0.00471384	RRN3	16	RRN3 homolog, RNA polymerase I transcription factor [Source:HGNC Symbol;Acc:HGNC:30346]	protein_coding
ENSG00000115904	0.598501	7.23176	30.9206	8.31231e-05	0.00471384	SOS1	2	SOS Ras/Rac guanine nucleotide exchange factor 1 [Source:HGNC Symbol;Acc:HGNC:11187]	protein_coding
ENSG00000163993	-1.34326	4.25866	30.9201	8.31297e-05	0.00471384	S100P	4	S100 calcium binding protein P [Source:HGNC Symbol;Acc:HGNC:10504]	protein_coding
ENSG00000150637	1.32623	3.87223	30.7251	8.56871e-05	0.00483844	CD226	18	CD226 molecule [Source:HGNC Symbol;Acc:HGNC:16961]	protein_coding
ENSG00000115956	0.86213	10.0078	30.6368	8.68741e-05	0.00488494	PLEK	2	pleckstrin [Source:HGNC Symbol;Acc:HGNC:9070]	protein_coding
ENSG00000171476	0.791438	4.56199	30.6007	8.73656e-05	0.00489211	HOPX	4	HOP homeobox [Source:HGNC Symbol;Acc:HGNC:24961]	protein_coding
ENSG00000198948	1.06898	3.84146	30.5475	8.80946e-05	0.00491246	MFAP3L	4	microfibril associated protein 3 like [Source:HGNC Symbol;Acc:HGNC:29083]	protein_coding
ENSG00000143226	0.744274	6.30458	30.3642	9.06613e-05	0.0050347	FCGR2A	1	Fc fragment of IgG receptor IIa [Source:HGNC Symbol;Acc:HGNC:3616]	protein_coding
ENSG00000129355	0.739144	5.61163	30.3078	9.14686e-05	0.00505863	CDKN2D	19	cyclin dependent kinase inhibitor 2D [Source:HGNC Symbol;Acc:HGNC:1790]	protein_coding
ENSG00000134247	1.43982	2.53449	30.064	9.50544e-05	0.00521111	PTGFRN	1	prostaglandin F2 receptor inhibitor [Source:HGNC Symbol;Acc:HGNC:9601]	protein_coding
ENSG00000159674	-1.24123	3.46738	30.0883	9.46906e-05	0.00521111	SPON2	4	spondin 2 [Source:HGNC Symbol;Acc:HGNC:11253]	protein_coding
ENSG00000184489	0.985627	3.81005	30.0418	9.5389e-05	0.00521111	PTP4A3	8	protein tyrosine phosphatase 4A3 [Source:HGNC Symbol;Acc:HGNC:9636]	protein_coding
ENSG00000198018	-0.882823	6.27971	29.9643	9.65669e-05	0.0052541	ENTPD7	10	ectonucleoside triphosphate diphosphohydrolase 7 [Source:HGNC Symbol;Acc:HGNC:19745]	protein_coding
ENSG00000179163	0.624734	6.5151	29.8364	9.85496e-05	0.00534035	FUCA1	1	alpha-L-fucosidase 1 [Source:HGNC Symbol;Acc:HGNC:4006]	protein_coding
ENSG00000129951	-1.44216	4.71852	29.7122	0.000100518	0.00542517	PLPPR3	19	phospholipid phosphatase related 3 [Source:HGNC Symbol;Acc:HGNC:23497]	protein_coding
ENSG00000108839	1.17664	5.04698	29.6405	0.000101675	0.00546565	ALOX12	17	arachidonate 12-lipoxygenase, 12S type [Source:HGNC Symbol;Acc:HGNC:429]	protein_coding
ENSG00000127955	0.97748	4.3103	29.6101	0.000102171	0.0054704	GNAI1	7	G protein subunit alpha i1 [Source:HGNC Symbol;Acc:HGNC:4384]	protein_coding
ENSG00000070526	-2.18483	1.49797	29.5048	0.000103908	0.00554135	ST6GALNAC1	17	ST6 N-acetylgalactosaminide alpha-2,6-sialyltransferase 1 [Source:HGNC Symbol;Acc:HGNC:23614]	protein_coding
ENSG00000164821	-1.48531	4.35814	29.4522	0.000104789	0.00556622	DEFA4	8	defensin alpha 4 [Source:HGNC Symbol;Acc:HGNC:2763]	protein_coding
ENSG00000151690	0.592141	5.82029	29.3595	0.000106362	0.00560738	MFSD6	2	major facilitator superfamily domain containing 6 [Source:HGNC Symbol;Acc:HGNC:24711]	protein_coding
ENSG00000167196	0.553297	6.05647	29.3573	0.000106398	0.00560738	FBXO22	15	F-box protein 22 [Source:HGNC Symbol;Acc:HGNC:13593]	protein_coding
ENSG00000043462	0.494761	7.31294	29.3014	0.00010736	0.00563601	LCP2	5	lymphocyte cytosolic protein 2 [Source:HGNC Symbol;Acc:HGNC:6529]	protein_coding
ENSG00000137500	0.442083	6.27614	29.2648	0.000107996	0.00564729	CCDC90B	11	coiled-coil domain containing 90B [Source:HGNC Symbol;Acc:HGNC:28108]	protein_coding
ENSG00000159788	0.826759	4.25676	29.2274	0.00010865	0.0056595	RGS12	4	regulator of G protein signaling 12 [Source:HGNC Symbol;Acc:HGNC:9994]	protein_coding
ENSG00000008394	-0.556139	8.5913	29.1332	0.000110315	0.00568019	MGST1	12	microsomal glutathione S-transferase 1 [Source:HGNC Symbol;Acc:HGNC:7061]	protein_coding
ENSG00000092067	-1.48518	4.70477	29.169	0.000109679	0.00568019	CEBPE	14	CCAAT enhancer binding protein epsilon [Source:HGNC Symbol;Acc:HGNC:1836]	protein_coding
ENSG00000135709	1.2706	3.52805	29.1339	0.000110303	0.00568019	KIAA0513	16	KIAA0513 [Source:HGNC Symbol;Acc:HGNC:29058]	protein_coding
ENSG00000124151	0.512644	5.821	29.0181	0.000112393	0.00574784	NCOA3	20	nuclear receptor coactivator 3 [Source:HGNC Symbol;Acc:HGNC:7670]	protein_coding
ENSG00000165929	1.04322	4.65895	29.013	0.000112485	0.00574784	TC2N	14	tandem C2 domains, nuclear [Source:HGNC Symbol;Acc:HGNC:19859]	protein_coding
ENSG00000137507	1.53868	4.48977	28.901	0.000114551	0.00580925	LRRC32	11	leucine rich repeat containing 32 [Source:HGNC Symbol;Acc:HGNC:4161]	protein_coding
ENSG00000149564	0.904741	5.88054	28.904	0.000114496	0.00580925	ESAM	11	endothelial cell adhesion molecule [Source:HGNC Symbol;Acc:HGNC:17474]	protein_coding
ENSG00000182747	1.55207	1.6623	28.79	0.000116641	0.005893	SLC35D3	6	solute carrier family 35 member D3 [Source:HGNC Symbol;Acc:HGNC:15621]	protein_coding
ENSG00000099337	0.675906	5.91116	28.5256	0.0001218	0.00610441	KCNK6	19	potassium two pore domain channel subfamily K member 6 [Source:HGNC Symbol;Acc:HGNC:6281]	protein_coding
ENSG00000173706	0.811787	4.04528	28.5162	0.000121988	0.00610441	HEG1	3	heart development protein with EGF like domains 1 [Source:HGNC Symbol;Acc:HGNC:29227]	protein_coding
ENSG00000185499	-1.21233	2.35049	28.5062	0.000122188	0.00610441	MUC1	1	mucin 1, cell surface associated [Source:HGNC Symbol;Acc:HGNC:7508]	protein_coding
ENSG00000067113	1.57346	5.75751	28.4151	0.000124033	0.00617361	PLPP1	5	phospholipid phosphatase 1 [Source:HGNC Symbol;Acc:HGNC:9228]	protein_coding
ENSG00000170439	-1.54333	2.62342	28.3911	0.000124525	0.00617523	METTL7B	12	methyltransferase like 7B [Source:HGNC Symbol;Acc:HGNC:28276]	protein_coding
ENSG00000005961	0.791077	9.42979	28.2198	0.000128098	0.00630589	ITGA2B	17	integrin subunit alpha 2b [Source:HGNC Symbol;Acc:HGNC:6138]	protein_coding
ENSG00000180773	-0.541297	6.02271	28.2394	0.000127684	0.00630589	SLC36A4	11	solute carrier family 36 member 4 [Source:HGNC Symbol;Acc:HGNC:19660]	protein_coding
ENSG00000072858	1.01036	3.03736	28.063	0.000131471	0.0064483	SIDT1	3	SID1 transmembrane family member 1 [Source:HGNC Symbol;Acc:HGNC:25967]	protein_coding
ENSG00000087589	1.09686	3.98	28.024	0.000132327	0.00646668	CASS4	20	Cas scaffold protein family member 4 [Source:HGNC Symbol;Acc:HGNC:15878]	protein_coding
ENSG00000116514	0.790005	4.13369	27.9632	0.000133671	0.00648712	RNF19B	1	ring finger protein 19B [Source:HGNC Symbol;Acc:HGNC:26886]	protein_coding
ENSG00000125384	-0.727254	5.46541	27.9615	0.00013371	0.00648712	PTGER2	14	prostaglandin E receptor 2 [Source:HGNC Symbol;Acc:HGNC:9594]	protein_coding
ENSG00000115602	0.741339	6.90784	27.8992	0.000135105	0.00650781	IL1RL1	2	interleukin 1 receptor like 1 [Source:HGNC Symbol;Acc:HGNC:5998]	protein_coding
ENSG00000131370	1.28937	3.47791	27.9031	0.000135019	0.00650781	SH3BP5	3	SH3 domain binding protein 5 [Source:HGNC Symbol;Acc:HGNC:10827]	protein_coding
ENSG00000196975	0.437322	6.4938	27.8684	0.000135802	0.00651799	ANXA4	2	annexin A4 [Source:HGNC Symbol;Acc:HGNC:542]	protein_coding
ENSG00000179165	3.72232	-0.643655	27.7196	0.000139224	0.00665846	PXT1	6	peroxisomal testis enriched protein 1 [Source:HGNC Symbol;Acc:HGNC:18312]	protein_coding
ENSG00000113749	-0.888591	5.08469	27.653	0.000140788	0.0067094	HRH2	5	histamine receptor H2 [Source:HGNC Symbol;Acc:HGNC:5183]	protein_coding
ENSG00000091317	0.40878	8.09871	27.5116	0.000144175	0.00684651	CMTM6	3	CKLF like MARVEL transmembrane domain containing 6 [Source:HGNC Symbol;Acc:HGNC:19177]	protein_coding
ENSG00000147443	0.747322	4.79047	27.4632	0.000145357	0.00687838	DOK2	8	docking protein 2 [Source:HGNC Symbol;Acc:HGNC:2991]	protein_coding
ENSG00000134873	-0.81637	4.26628	27.3992	0.000146934	0.00690438	CLDN10	13	claudin 10 [Source:HGNC Symbol;Acc:HGNC:2033]	protein_coding
ENSG00000172986	-1.13787	2.64	27.4111	0.000146639	0.00690438	GXYLT2	3	glucoside xylosyltransferase 2 [Source:HGNC Symbol;Acc:HGNC:33383]	protein_coding
ENSG00000010404	0.622426	4.15281	27.2094	0.000151734	0.0069124	IDS	X	iduronate 2-sulfatase [Source:HGNC Symbol;Acc:HGNC:5389]	protein_coding
ENSG00000047648	1.30152	4.18307	27.2259	0.000151311	0.0069124	ARHGAP6	X	Rho GTPase activating protein 6 [Source:HGNC Symbol;Acc:HGNC:676]	protein_coding
ENSG00000106868	0.416634	7.01535	27.3691	0.000147683	0.0069124	SUSD1	9	sushi domain containing 1 [Source:HGNC Symbol;Acc:HGNC:25413]	protein_coding
ENSG00000109674	-0.504442	5.37089	27.2464	0.000150786	0.0069124	NEIL3	4	nei like DNA glycosylase 3 [Source:HGNC Symbol;Acc:HGNC:24573]	protein_coding
ENSG00000110934	0.485341	7.95078	27.2916	0.000149635	0.0069124	BIN2	12	bridging integrator 2 [Source:HGNC Symbol;Acc:HGNC:1053]	protein_coding
ENSG00000146112	0.497002	5.46908	27.2929	0.000149602	0.0069124	PPP1R18	6	protein phosphatase 1 regulatory subunit 18 [Source:HGNC Symbol;Acc:HGNC:29413]	protein_coding
ENSG00000156575	-2.69748	5.49318	27.2374	0.000151015	0.0069124	PRG3	11	proteoglycan 3, pro eosinophil major basic protein 2 [Source:HGNC Symbol;Acc:HGNC:9363]	protein_coding
ENSG00000205978	0.815927	5.29881	27.2576	0.000150499	0.0069124	NYNRIN	14	NYN domain and retroviral integrase containing [Source:HGNC Symbol;Acc:HGNC:20165]	protein_coding
ENSG00000286169	0.756561	4.44535	27.3249	0.000148793	0.0069124	PDCD6-AHRR	5	PDCD6-AHRR readthrough (NMD candidate) [Source:HGNC Symbol;Acc:HGNC:54724]	protein_coding
ENSG00000121053	-2.25849	10.7003	27.1854	0.000152353	0.00691715	EPX	17	eosinophil peroxidase [Source:HGNC Symbol;Acc:HGNC:3423]	protein_coding
ENSG00000178732	1.35926	4.66468	27.1309	0.000153771	0.00695802	GP5	3	glycoprotein V platelet [Source:HGNC Symbol;Acc:HGNC:4443]	protein_coding
ENSG00000108840	0.517467	5.66519	27.0746	0.000155254	0.00700153	HDAC5	17	histone deacetylase 5 [Source:HGNC Symbol;Acc:HGNC:14068]	protein_coding
ENSG00000121807	-1.4113	3.04878	26.9973	0.000157313	0.00707066	CCR2	3	C-C motif chemokine receptor 2 [Source:HGNC Symbol;Acc:HGNC:1603]	protein_coding
ENSG00000180354	0.582536	5.91766	26.9108	0.000159655	0.00715202	MTURN	7	maturin, neural progenitor differentiation regulator homolog [Source:HGNC Symbol;Acc:HGNC:25457]	protein_coding
ENSG00000143333	1.49158	2.53392	26.8757	0.000160617	0.00716865	RGS16	1	regulator of G protein signaling 16 [Source:HGNC Symbol;Acc:HGNC:9997]	protein_coding
ENSG00000263264	-0.893096	3.5513	26.8584	0.000161093	0.00716865		19	novel protein	protein_coding
ENSG00000184785	-0.788521	4.21616	26.8322	0.000161819	0.00717718	SMIM10	X	small integral membrane protein 10 [Source:HGNC Symbol;Acc:HGNC:41913]	protein_coding
ENSG00000149115	-0.980858	3.19472	26.761	0.000163808	0.00724152	TNKS1BP1	11	tankyrase 1 binding protein 1 [Source:HGNC Symbol;Acc:HGNC:19081]	protein_coding
ENSG00000115461	-1.89566	2.63612	26.7353	0.000164534	0.00724977	IGFBP5	2	insulin like growth factor binding protein 5 [Source:HGNC Symbol;Acc:HGNC:5474]	protein_coding
ENSG00000136997	-0.584553	8.60598	26.6955	0.000165663	0.00727566	MYC	8	MYC proto-oncogene, bHLH transcription factor [Source:HGNC Symbol;Acc:HGNC:7553]	protein_coding
ENSG00000049130	4.40687	0.762142	26.6331	0.000167451	0.00731237	KITLG	12	KIT ligand [Source:HGNC Symbol;Acc:HGNC:6343]	protein_coding
ENSG00000152518	-0.543695	9.1351	26.6284	0.000167588	0.00731237	ZFP36L2	2	ZFP36 ring finger protein like 2 [Source:HGNC Symbol;Acc:HGNC:1108]	protein_coding
ENSG00000277639	3.14707	-0.768867	26.4897	0.00017165	0.0074654		16	novel protein	protein_coding
ENSG00000177469	0.599717	7.10536	26.4657	0.000172363	0.0074722	CAVIN1	17	caveolae associated protein 1 [Source:HGNC Symbol;Acc:HGNC:9688]	protein_coding
ENSG00000140479	1.10428	3.95233	26.3714	0.000175205	0.00753129	PCSK6	15	proprotein convertase subtilisin/kexin type 6 [Source:HGNC Symbol;Acc:HGNC:8569]	protein_coding
ENSG00000169398	0.818644	4.66817	26.3647	0.000175407	0.00753129	PTK2	8	protein tyrosine kinase 2 [Source:HGNC Symbol;Acc:HGNC:9611]	protein_coding
ENSG00000171401	-2.68032	-0.261899	26.3884	0.000174688	0.00753129	KRT13	17	keratin 13 [Source:HGNC Symbol;Acc:HGNC:6415]	protein_coding
ENSG00000073756	2.10415	3.7421	26.2875	0.000177774	0.00754838	PTGS2	1	prostaglandin-endoperoxide synthase 2 [Source:HGNC Symbol;Acc:HGNC:9605]	protein_coding
ENSG00000083454	-0.742498	3.76891	26.2826	0.000177928	0.00754838	P2RX5	17	purinergic receptor P2X 5 [Source:HGNC Symbol;Acc:HGNC:8536]	protein_coding
ENSG00000134321	0.680957	4.66751	26.3113	0.000177043	0.00754838	RSAD2	2	radical S-adenosyl methionine domain containing 2 [Source:HGNC Symbol;Acc:HGNC:30908]	protein_coding
ENSG00000162614	1.0845	3.32074	26.2786	0.000178052	0.00754838	NEXN	1	nexilin F-actin binding protein [Source:HGNC Symbol;Acc:HGNC:29557]	protein_coding
ENSG00000102265	0.640197	7.53519	26.231	0.000179533	0.00758725	TIMP1	X	TIMP metallopeptidase inhibitor 1 [Source:HGNC Symbol;Acc:HGNC:11820]	protein_coding
ENSG00000168297	-0.596146	7.73713	26.1988	0.000180542	0.00760598	PXK	3	PX domain containing serine/threonine kinase like [Source:HGNC Symbol;Acc:HGNC:23326]	protein_coding
ENSG00000139970	1.12639	4.22312	26.1457	0.000182222	0.00765276	RTN1	14	reticulon 1 [Source:HGNC Symbol;Acc:HGNC:10467]	protein_coding
ENSG00000137845	0.412291	7.82374	26.0583	0.000185026	0.0077463	ADAM10	15	ADAM metallopeptidase domain 10 [Source:HGNC Symbol;Acc:HGNC:188]	protein_coding
ENSG00000095970	2.59196	0.160866	26.0142	0.000186459	0.00778207	TREM2	6	triggering receptor expressed on myeloid cells 2 [Source:HGNC Symbol;Acc:HGNC:17761]	protein_coding
ENSG00000119865	-0.554659	6.32082	25.9716	0.000187857	0.00779478	CNRIP1	2	cannabinoid receptor interacting protein 1 [Source:HGNC Symbol;Acc:HGNC:24546]	protein_coding
ENSG00000198673	0.799973	5.51596	25.9696	0.000187924	0.00779478	TAFA2	12	TAFA chemokine like family member 2 [Source:HGNC Symbol;Acc:HGNC:21589]	protein_coding
ENSG00000196415	-2.073	11.2085	25.8372	0.000192344	0.00795357	PRTN3	19	proteinase 3 [Source:HGNC Symbol;Acc:HGNC:9495]	protein_coding
ENSG00000114446	-0.574938	6.50432	25.7317	0.000195952	0.0080446	IFT57	3	intraflagellar transport 57 [Source:HGNC Symbol;Acc:HGNC:17367]	protein_coding
ENSG00000119979	-0.546617	7.03931	25.7017	0.000196996	0.0080446	DENND10	10	DENN domain containing 10 [Source:HGNC Symbol;Acc:HGNC:31793]	protein_coding
ENSG00000152229	0.525276	8.0092	25.7158	0.000196506	0.0080446	PSTPIP2	18	proline-serine-threonine phosphatase interacting protein 2 [Source:HGNC Symbol;Acc:HGNC:9581]	protein_coding
ENSG00000196730	0.440868	7.01665	25.7154	0.000196518	0.0080446	DAPK1	9	death associated protein kinase 1 [Source:HGNC Symbol;Acc:HGNC:2674]	protein_coding
ENSG00000236320	1.74977	1.01597	25.6861	0.000197538	0.0080446	SLFN14	17	schlafen family member 14 [Source:HGNC Symbol;Acc:HGNC:32689]	protein_coding
ENSG00000007237	1.02226	4.10583	25.6097	0.000200227	0.00812945	GAS7	17	growth arrest specific 7 [Source:HGNC Symbol;Acc:HGNC:4169]	protein_coding
ENSG00000163631	1.68559	2.26996	25.5637	0.000201865	0.00817127	ALB	4	albumin [Source:HGNC Symbol;Acc:HGNC:399]	protein_coding
ENSG00000175591	-0.877531	5.3033	25.5428	0.000202614	0.00817695	P2RY2	11	purinergic receptor P2Y2 [Source:HGNC Symbol;Acc:HGNC:8541]	protein_coding
ENSG00000049323	0.918519	7.59007	25.488	0.000204593	0.00823212	LTBP1	2	latent transforming growth factor beta binding protein 1 [Source:HGNC Symbol;Acc:HGNC:6714]	protein_coding
ENSG00000104518	-0.757276	6.30506	25.4029	0.000207713	0.00827647	GSDMD	8	gasdermin D [Source:HGNC Symbol;Acc:HGNC:25697]	protein_coding
ENSG00000119408	0.474358	6.1427	25.4317	0.000206652	0.00827647	NEK6	9	NIMA related kinase 6 [Source:HGNC Symbol;Acc:HGNC:7749]	protein_coding
ENSG00000196126	0.388787	8.06165	25.3909	0.000208159	0.00827647	HLA-DRB1	6	major histocompatibility complex, class II, DR beta 1 [Source:HGNC Symbol;Acc:HGNC:4948]	protein_coding
ENSG00000214456	-1.67386	1.92002	25.4086	0.000207502	0.00827647	PLIN5	19	perilipin 5 [Source:HGNC Symbol;Acc:HGNC:33196]	protein_coding
ENSG00000173898	-1.80484	1.90415	25.2583	0.000213139	0.00844949	SPTBN2	11	spectrin beta, non-erythrocytic 2 [Source:HGNC Symbol;Acc:HGNC:11276]	protein_coding
ENSG00000153132	-0.5075	4.87491	25.224	0.000214453	0.00847659	CLGN	4	calmegin [Source:HGNC Symbol;Acc:HGNC:2060]	protein_coding
ENSG00000221869	-0.957514	5.13	25.179	0.000216187	0.00852005	CEBPD	8	CCAAT enhancer binding protein delta [Source:HGNC Symbol;Acc:HGNC:1835]	protein_coding
ENSG00000092531	0.469989	6.57449	25.1303	0.000218082	0.00856962	SNAP23	15	synaptosome associated protein 23 [Source:HGNC Symbol;Acc:HGNC:11131]	protein_coding
ENSG00000115884	3.5027	-0.173332	28.2597	0.000220165	0.00860115	SDC1	2	syndecan 1 [Source:HGNC Symbol;Acc:HGNC:10658]	protein_coding
ENSG00000139182	0.820968	4.13749	25.079	0.0002201	0.00860115	CLSTN3	12	calsyntenin 3 [Source:HGNC Symbol;Acc:HGNC:18371]	protein_coding
ENSG00000160190	0.804774	5.50246	25.0174	0.000222547	0.00863072	SLC37A1	21	solute carrier family 37 member 1 [Source:HGNC Symbol;Acc:HGNC:11024]	protein_coding
ENSG00000166743	-0.782283	3.84273	24.997	0.000223368	0.00863072	ACSM1	16	acyl-CoA synthetase medium chain family member 1 [Source:HGNC Symbol;Acc:HGNC:18049]	protein_coding
ENSG00000187840	-0.480561	7.56654	24.9939	0.000223491	0.00863072	EIF4EBP1	8	eukaryotic translation initiation factor 4E binding protein 1 [Source:HGNC Symbol;Acc:HGNC:3288]	protein_coding
ENSG00000203685	2.19663	1.14117	25.0178	0.000222535	0.00863072	STUM	1	stum, mechanosensory transduction mediator homolog [Source:HGNC Symbol;Acc:HGNC:30491]	protein_coding
ENSG00000143622	0.512816	5.43953	24.9696	0.000224473	0.00864383	RIT1	1	Ras like without CAAX 1 [Source:HGNC Symbol;Acc:HGNC:10023]	protein_coding
ENSG00000149516	-0.684324	7.91557	24.9338	0.000225927	0.00867011	MS4A3	11	membrane spanning 4-domains A3 [Source:HGNC Symbol;Acc:HGNC:7317]	protein_coding
ENSG00000196083	0.535808	5.20559	24.921	0.000226446	0.00867011	IL1RAP	3	interleukin 1 receptor accessory protein [Source:HGNC Symbol;Acc:HGNC:5995]	protein_coding
ENSG00000112299	0.81373	3.20855	24.89	0.000227717	0.00869402	VNN1	6	vanin 1 [Source:HGNC Symbol;Acc:HGNC:12705]	protein_coding
ENSG00000143324	0.562509	5.33172	24.8633	0.00022882	0.00871135	XPR1	1	xenotropic and polytropic retrovirus receptor 1 [Source:HGNC Symbol;Acc:HGNC:12827]	protein_coding
ENSG00000256269	-0.537197	6.50781	24.728	0.000234493	0.00890212	HMBS	11	hydroxymethylbilane synthase [Source:HGNC Symbol;Acc:HGNC:4982]	protein_coding
ENSG00000162654	0.696453	4.03677	24.6917	0.000236041	0.00891055	GBP4	1	guanylate binding protein 4 [Source:HGNC Symbol;Acc:HGNC:20480]	protein_coding
ENSG00000163110	0.554726	6.4688	24.699	0.000235726	0.00891055	PDLIM5	4	PDZ and LIM domain 5 [Source:HGNC Symbol;Acc:HGNC:17468]	protein_coding
ENSG00000167419	-1.15567	4.73818	24.5745	0.000241122	0.00907688	LPO	17	lactoperoxidase [Source:HGNC Symbol;Acc:HGNC:6678]	protein_coding
ENSG00000119411	-0.751316	5.53994	24.5346	0.000242882	0.00911757	BSPRY	9	B-box and SPRY domain containing [Source:HGNC Symbol;Acc:HGNC:18232]	protein_coding
ENSG00000165702	0.686955	7.2226	24.4942	0.000244678	0.0091594	GFI1B	9	growth factor independent 1B transcriptional repressor [Source:HGNC Symbol;Acc:HGNC:4238]	protein_coding
ENSG00000154783	0.799035	3.53045	24.439	0.000247159	0.00922659	FGD5	3	FYVE, RhoGEF and PH domain containing 5 [Source:HGNC Symbol;Acc:HGNC:19117]	protein_coding
ENSG00000138646	0.538105	4.94411	24.3452	0.00025144	0.00936039	HERC5	4	HECT and RLD domain containing E3 ubiquitin protein ligase 5 [Source:HGNC Symbol;Acc:HGNC:24368]	protein_coding
ENSG00000204287	0.5026	8.73407	24.2848	0.000254239	0.00943846	HLA-DRA	6	major histocompatibility complex, class II, DR alpha [Source:HGNC Symbol;Acc:HGNC:4947]	protein_coding
ENSG00000129521	1.0113	3.15491	24.137	0.000261246	0.00967185	EGLN3	14	egl-9 family hypoxia inducible factor 3 [Source:HGNC Symbol;Acc:HGNC:14661]	protein_coding
ENSG00000185650	0.743342	4.4527	24.0718	0.000264407	0.00976198	ZFP36L1	14	ZFP36 ring finger protein like 1 [Source:HGNC Symbol;Acc:HGNC:1107]	protein_coding
ENSG00000171051	1.49197	2.33872	24.0287	0.000266522	0.00981314	FPR1	19	formyl peptide receptor 1 [Source:HGNC Symbol;Acc:HGNC:3826]	protein_coding
ENSG00000070081	-0.526359	10.0155	23.9916	0.00026836	0.00985378	NUCB2	11	nucleobindin 2 [Source:HGNC Symbol;Acc:HGNC:8044]	protein_coding
ENSG00000124107	-1.50744	4.23127	23.9036	0.000272772	0.0099885	SLPI	20	secretory leukocyte peptidase inhibitor [Source:HGNC Symbol;Acc:HGNC:11092]	protein_coding
ENSG00000121236	-0.668331	4.94318	23.8708	0.000274436	0.0100221	TRIM6	11	tripartite motif containing 6 [Source:HGNC Symbol;Acc:HGNC:16277]	protein_coding
ENSG00000185989	0.559614	6.13808	23.6921	0.00028372	0.0103331	RASA3	13	RAS p21 protein activator 3 [Source:HGNC Symbol;Acc:HGNC:20331]	protein_coding
ENSG00000145703	0.397148	8.38838	23.5904	0.000289164	0.0104746	IQGAP2	5	IQ motif containing GTPase activating protein 2 [Source:HGNC Symbol;Acc:HGNC:6111]	protein_coding
ENSG00000198598	1.03926	3.25194	23.5952	0.000288903	0.0104746	MMP17	12	matrix metallopeptidase 17 [Source:HGNC Symbol;Acc:HGNC:7163]	protein_coding
ENSG00000126860	0.824207	3.63559	23.5463	0.00029156	0.010533	EVI2A	17	ecotropic viral integration site 2A [Source:HGNC Symbol;Acc:HGNC:3499]	protein_coding
ENSG00000134352	0.677312	5.02811	23.433	0.000297828	0.0106824	IL6ST	5	interleukin 6 signal transducer [Source:HGNC Symbol;Acc:HGNC:6021]	protein_coding
ENSG00000137942	0.701578	5.16481	23.4145	0.00029887	0.0106824	FNBP1L	1	formin binding protein 1 like [Source:HGNC Symbol;Acc:HGNC:20851]	protein_coding
ENSG00000148175	0.682987	8.9048	23.4144	0.000298876	0.0106824	STOM	9	stomatin [Source:HGNC Symbol;Acc:HGNC:3383]	protein_coding
ENSG00000168671	-1.24134	3.56479	23.4248	0.000298288	0.0106824	UGT3A2	5	UDP glycosyltransferase family 3 member A2 [Source:HGNC Symbol;Acc:HGNC:27266]	protein_coding
ENSG00000153283	-0.959246	5.60542	23.3624	0.000301817	0.0107589	CD96	3	CD96 molecule [Source:HGNC Symbol;Acc:HGNC:16892]	protein_coding
ENSG00000064393	0.564868	6.03891	23.3185	0.000304323	0.0108196	HIPK2	7	homeodomain interacting protein kinase 2 [Source:HGNC Symbol;Acc:HGNC:14402]	protein_coding
ENSG00000115271	-0.47911	6.97855	23.2902	0.000305955	0.0108489	GCA	2	grancalcin [Source:HGNC Symbol;Acc:HGNC:15990]	protein_coding
ENSG00000129675	0.374694	8.06071	23.117	0.000316149	0.0111809	ARHGEF6	X	Rac/Cdc42 guanine nucleotide exchange factor 6 [Source:HGNC Symbol;Acc:HGNC:685]	protein_coding
ENSG00000164300	-0.77282	4.6998	23.095	0.000317469	0.0111981	SERINC5	5	serine incorporator 5 [Source:HGNC Symbol;Acc:HGNC:18825]	protein_coding
ENSG00000004399	-0.54706	6.89365	23.0648	0.000319298	0.0112331	PLXND1	3	plexin D1 [Source:HGNC Symbol;Acc:HGNC:9107]	protein_coding
ENSG00000101605	1.30124	3.24133	23.007	0.000322826	0.0112687	MYOM1	18	myomesin 1 [Source:HGNC Symbol;Acc:HGNC:7613]	protein_coding
ENSG00000153162	1.8698	0.254267	23.0148	0.000322346	0.0112687	BMP6	6	bone morphogenetic protein 6 [Source:HGNC Symbol;Acc:HGNC:1073]	protein_coding
ENSG00000159840	0.476173	7.84352	23.0172	0.000322203	0.0112687	ZYX	7	zyxin [Source:HGNC Symbol;Acc:HGNC:13200]	protein_coding
ENSG00000113070	1.47959	1.81333	22.9577	0.00032587	0.0113161	HBEGF	5	heparin binding EGF like growth factor [Source:HGNC Symbol;Acc:HGNC:3059]	protein_coding
ENSG00000135604	0.742507	5.51455	22.9443	0.000326709	0.0113161	STX11	6	syntaxin 11 [Source:HGNC Symbol;Acc:HGNC:11429]	protein_coding
ENSG00000171509	0.705401	5.29121	22.9673	0.000325279	0.0113161	RXFP1	4	relaxin family peptide receptor 1 [Source:HGNC Symbol;Acc:HGNC:19718]	protein_coding
ENSG00000136295	0.573786	5.87468	22.8495	0.000332673	0.011493	TTYH3	7	tweety family member 3 [Source:HGNC Symbol;Acc:HGNC:22222]	protein_coding
ENSG00000162836	-0.529911	4.51828	22.832	0.000333791	0.0115021	ACP6	1	acid phosphatase 6, lysophosphatidic [Source:HGNC Symbol;Acc:HGNC:29609]	protein_coding
ENSG00000105516	-0.703243	3.58674	22.7831	0.000336926	0.0115549	DBP	19	D-box binding PAR bZIP transcription factor [Source:HGNC Symbol;Acc:HGNC:2697]	protein_coding
ENSG00000150594	1.06621	4.62573	22.7813	0.000337043	0.0115549	ADRA2A	10	adrenoceptor alpha 2A [Source:HGNC Symbol;Acc:HGNC:281]	protein_coding
ENSG00000197965	-0.38957	6.87227	22.7377	0.000339874	0.0116223	MPZL1	1	myelin protein zero like 1 [Source:HGNC Symbol;Acc:HGNC:7226]	protein_coding
ENSG00000088726	1.57338	2.83082	22.7104	0.000341661	0.0116538	TMEM40	3	transmembrane protein 40 [Source:HGNC Symbol;Acc:HGNC:25620]	protein_coding
ENSG00000272398	-1.63219	4.89929	22.6548	0.000345333	0.0117195	CD24	6	CD24 molecule [Source:HGNC Symbol;Acc:HGNC:1645]	protein_coding
ENSG00000275832	-0.731358	3.44358	22.6613	0.000344896	0.0117195	ARHGAP23	17	Rho GTPase activating protein 23 [Source:HGNC Symbol;Acc:HGNC:29293]	protein_coding
ENSG00000108846	1.47641	3.49481	22.589	0.000349732	0.0118389	ABCC3	17	ATP binding cassette subfamily C member 3 [Source:HGNC Symbol;Acc:HGNC:54]	protein_coding
ENSG00000169442	0.619942	7.37127	22.5638	0.000351432	0.0118666	CD52	1	CD52 molecule [Source:HGNC Symbol;Acc:HGNC:1804]	protein_coding
ENSG00000169385	-1.02877	11.9082	22.5401	0.000353046	0.0118912	RNASE2	14	ribonuclease A family member 2 [Source:HGNC Symbol;Acc:HGNC:10045]	protein_coding
ENSG00000140009	1.04547	2.8071	22.4856	0.00035678	0.0119869	ESR2	14	estrogen receptor 2 [Source:HGNC Symbol;Acc:HGNC:3468]	protein_coding
ENSG00000100592	0.714765	6.12534	22.3253	0.000368031	0.0122933	DAAM1	14	dishevelled associated activator of morphogenesis 1 [Source:HGNC Symbol;Acc:HGNC:18142]	protein_coding
ENSG00000136603	1.1007	3.66387	22.2914	0.000370463	0.0122933	SKIL	3	SKI like proto-oncogene [Source:HGNC Symbol;Acc:HGNC:10897]	protein_coding
ENSG00000151917	-0.917136	3.3773	22.3017	0.000369726	0.0122933	BEND6	6	BEN domain containing 6 [Source:HGNC Symbol;Acc:HGNC:20871]	protein_coding
ENSG00000157600	0.508555	4.99473	22.2913	0.000370472	0.0122933	TMEM164	X	transmembrane protein 164 [Source:HGNC Symbol;Acc:HGNC:26217]	protein_coding
ENSG00000185305	0.555196	5.33633	22.3107	0.000369081	0.0122933	ARL15	5	ADP ribosylation factor like GTPase 15 [Source:HGNC Symbol;Acc:HGNC:25945]	protein_coding
ENSG00000101608	0.393322	8.83008	22.1827	0.000378385	0.0124942	MYL12A	18	myosin light chain 12A [Source:HGNC Symbol;Acc:HGNC:16701]	protein_coding
ENSG00000113140	0.473574	7.22691	22.1941	0.000377548	0.0124942	SPARC	5	secreted protein acidic and cysteine rich [Source:HGNC Symbol;Acc:HGNC:11219]	protein_coding
ENSG00000150556	2.56788	0.16571	22.1498	0.000380823	0.0125438	LYPD6B	2	LY6/PLAUR domain containing 6B [Source:HGNC Symbol;Acc:HGNC:27018]	protein_coding
ENSG00000072657	1.23769	2.52928	21.9867	0.000393171	0.012856	TRHDE	12	thyrotropin releasing hormone degrading enzyme [Source:HGNC Symbol;Acc:HGNC:30748]	protein_coding
ENSG00000180644	1.36269	1.55058	21.9967	0.000392399	0.012856	PRF1	10	perforin 1 [Source:HGNC Symbol;Acc:HGNC:9360]	protein_coding
ENSG00000185043	-0.47913	6.44789	21.9978	0.000392314	0.012856	CIB1	15	calcium and integrin binding 1 [Source:HGNC Symbol;Acc:HGNC:16920]	protein_coding
ENSG00000185198	-0.615527	10.0001	21.9667	0.000394717	0.0128753	PRSS57	19	serine protease 57 [Source:HGNC Symbol;Acc:HGNC:31397]	protein_coding
ENSG00000005844	0.538008	6.83515	21.9035	0.000399652	0.0129888	ITGAL	16	integrin subunit alpha L [Source:HGNC Symbol;Acc:HGNC:6148]	protein_coding
ENSG00000105329	0.596357	6.67942	21.875	0.000401898	0.0129888	TGFB1	19	transforming growth factor beta 1 [Source:HGNC Symbol;Acc:HGNC:11766]	protein_coding
ENSG00000127314	0.633915	8.45655	21.8393	0.000404732	0.0129888	RAP1B	12	RAP1B, member of RAS oncogene family [Source:HGNC Symbol;Acc:HGNC:9857]	protein_coding
ENSG00000159640	1.07383	2.53516	21.8457	0.000404223	0.0129888	ACE	17	angiotensin I converting enzyme [Source:HGNC Symbol;Acc:HGNC:2707]	protein_coding
ENSG00000160161	-1.61307	4.25407	21.8447	0.000404299	0.0129888	CILP2	19	cartilage intermediate layer protein 2 [Source:HGNC Symbol;Acc:HGNC:24213]	protein_coding
ENSG00000164237	0.710341	5.54385	21.8537	0.000403582	0.0129888	CMBL	5	carboxymethylenebutenolidase homolog [Source:HGNC Symbol;Acc:HGNC:25090]	protein_coding
ENSG00000197993	-0.821787	4.1165	21.8364	0.000404963	0.0129888	KEL	7	Kell metallo-endopeptidase (Kell blood group) [Source:HGNC Symbol;Acc:HGNC:6308]	protein_coding
ENSG00000160593	0.808077	3.9437	21.8192	0.000406336	0.0130018	JAML	11	junction adhesion molecule like [Source:HGNC Symbol;Acc:HGNC:19084]	protein_coding
ENSG00000119866	-0.4733	6.22393	21.7003	0.000415987	0.013279	BCL11A	2	BAF chromatin remodeling complex subunit BCL11A [Source:HGNC Symbol;Acc:HGNC:13221]	protein_coding
ENSG00000171502	0.810776	3.98948	21.6794	0.000417715	0.0133025	COL24A1	1	collagen type XXIV alpha 1 chain [Source:HGNC Symbol;Acc:HGNC:20821]	protein_coding
ENSG00000091490	0.421612	6.51891	21.6583	0.000419466	0.0133061	SEL1L3	4	SEL1L family member 3 [Source:HGNC Symbol;Acc:HGNC:29108]	protein_coding
ENSG00000147852	-1.42085	2.42411	21.6542	0.000419807	0.0133061	VLDLR	9	very low density lipoprotein receptor [Source:HGNC Symbol;Acc:HGNC:12698]	protein_coding
ENSG00000133246	-0.69607	6.25996	21.6411	0.000420894	0.0133091	PRAM1	19	PML-RARA regulated adaptor molecule 1 [Source:HGNC Symbol;Acc:HGNC:30091]	protein_coding
ENSG00000100473	0.767981	5.68398	21.6185	0.000422785	0.0133376	COCH	14	cochlin [Source:HGNC Symbol;Acc:HGNC:2180]	protein_coding
ENSG00000074935	-0.547459	4.76375	21.5681	0.000427037	0.0134139	TUBE1	6	tubulin epsilon 1 [Source:HGNC Symbol;Acc:HGNC:20775]	protein_coding
ENSG00000150681	0.557928	6.91092	21.5661	0.000427201	0.0134139	RGS18	1	regulator of G protein signaling 18 [Source:HGNC Symbol;Acc:HGNC:14261]	protein_coding
ENSG00000165617	1.21747	1.64976	21.5384	0.000429563	0.0134566	DACT1	14	dishevelled binding antagonist of beta catenin 1 [Source:HGNC Symbol;Acc:HGNC:17748]	protein_coding
ENSG00000164116	0.542977	6.41873	21.5157	0.000431507	0.0134861	GUCY1A1	4	guanylate cyclase 1 soluble subunit alpha 1 [Source:HGNC Symbol;Acc:HGNC:4685]	protein_coding
ENSG00000198604	-0.436263	6.98996	21.4996	0.000432889	0.0134979	BAZ1A	14	bromodomain adjacent to zinc finger domain 1A [Source:HGNC Symbol;Acc:HGNC:960]	protein_coding
ENSG00000130203	-1.68513	4.60248	21.4723	0.000435249	0.0135401	APOE	19	apolipoprotein E [Source:HGNC Symbol;Acc:HGNC:613]	protein_coding
ENSG00000167536	-0.765083	4.1475	21.4173	0.000440047	0.0136577	DHRS13	17	dehydrogenase/reductase 13 [Source:HGNC Symbol;Acc:HGNC:28326]	protein_coding
ENSG00000135749	1.25499	2.32485	21.2838	0.000451951	0.0139949	PCNX2	1	pecanex 2 [Source:HGNC Symbol;Acc:HGNC:8736]	protein_coding
ENSG00000136048	0.404854	6.3537	21.2596	0.00045415	0.0140306	DRAM1	12	DNA damage regulated autophagy modulator 1 [Source:HGNC Symbol;Acc:HGNC:25645]	protein_coding
ENSG00000070540	0.523591	5.286	21.2189	0.000457874	0.0140746	WIPI1	17	WD repeat domain, phosphoinositide interacting 1 [Source:HGNC Symbol;Acc:HGNC:25471]	protein_coding
ENSG00000135318	3.52818	-0.778876	21.1984	0.000459764	0.0140746	NT5E	6	5'-nucleotidase ecto [Source:HGNC Symbol;Acc:HGNC:8021]	protein_coding
ENSG00000154146	0.841472	4.50773	21.2199	0.000457779	0.0140746	NRGN	11	neurogranin [Source:HGNC Symbol;Acc:HGNC:8000]	protein_coding
ENSG00000161544	3.85832	-1.06006	21.1999	0.000459627	0.0140746	CYGB	17	cytoglobin [Source:HGNC Symbol;Acc:HGNC:16505]	protein_coding
ENSG00000198561	0.449132	6.6442	21.1221	0.00046687	0.0142597	CTNND1	11	catenin delta 1 [Source:HGNC Symbol;Acc:HGNC:2515]	protein_coding
ENSG00000111186	-1.0045	2.99714	21.0278	0.000475836	0.0145006	WNT5B	12	Wnt family member 5B [Source:HGNC Symbol;Acc:HGNC:16265]	protein_coding
ENSG00000173890	-0.846514	4.98289	20.9892	0.000479556	0.0145809	GPR160	3	G protein-coupled receptor 160 [Source:HGNC Symbol;Acc:HGNC:23693]	protein_coding
ENSG00000120915	1.14147	2.12501	20.9741	0.000481022	0.0145925	EPHX2	8	epoxide hydrolase 2 [Source:HGNC Symbol;Acc:HGNC:3402]	protein_coding
ENSG00000154639	-1.87032	1.51602	20.9086	0.000487446	0.014754	CXADR	21	CXADR Ig-like cell adhesion molecule [Source:HGNC Symbol;Acc:HGNC:2559]	protein_coding
ENSG00000005381	-1.37189	13.3304	20.8906	0.000489226	0.0147709	MPO	17	myeloperoxidase [Source:HGNC Symbol;Acc:HGNC:7218]	protein_coding
ENSG00000092096	1.11035	3.49879	20.8808	0.000490201	0.0147709	SLC22A17	14	solute carrier family 22 member 17 [Source:HGNC Symbol;Acc:HGNC:23095]	protein_coding
ENSG00000133169	-0.84668	6.56974	20.8214	0.000496148	0.0149166	BEX1	X	brain expressed X-linked 1 [Source:HGNC Symbol;Acc:HGNC:1036]	protein_coding
ENSG00000107566	-0.519206	8.03551	20.719	0.000506596	0.0150996	ERLIN1	10	ER lipid raft associated 1 [Source:HGNC Symbol;Acc:HGNC:16947]	protein_coding
ENSG00000125952	0.339716	8.05909	20.7373	0.000504708	0.0150996	MAX	14	MYC associated factor X [Source:HGNC Symbol;Acc:HGNC:6913]	protein_coding
ENSG00000127824	0.700272	6.53138	20.7285	0.000505618	0.0150996	TUBA4A	2	tubulin alpha 4a [Source:HGNC Symbol;Acc:HGNC:12407]	protein_coding
ENSG00000171033	0.774489	4.61711	20.7177	0.000506729	0.0150996	PKIA	8	cAMP-dependent protein kinase inhibitor alpha [Source:HGNC Symbol;Acc:HGNC:9017]	protein_coding
ENSG00000136929	0.689259	5.97355	20.6835	0.000510276	0.0151382	HEMGN	9	hemogen [Source:HGNC Symbol;Acc:HGNC:17509]	protein_coding
ENSG00000186469	-0.769819	4.60454	20.6942	0.000509163	0.0151382	GNG2	14	G protein subunit gamma 2 [Source:HGNC Symbol;Acc:HGNC:4404]	protein_coding
ENSG00000100097	0.489701	8.79265	20.6644	0.000512266	0.0151638	LGALS1	22	galectin 1 [Source:HGNC Symbol;Acc:HGNC:6561]	protein_coding
ENSG00000086548	-1.80127	6.44614	20.6273	0.000516167	0.0151821	CEACAM6	19	CEA cell adhesion molecule 6 [Source:HGNC Symbol;Acc:HGNC:1818]	protein_coding
ENSG00000134627	-0.963098	4.13988	20.6263	0.000516275	0.0151821	PIWIL4	11	piwi like RNA-mediated gene silencing 4 [Source:HGNC Symbol;Acc:HGNC:18444]	protein_coding
ENSG00000184428	-0.5844	6.40612	20.6357	0.000515288	0.0151821	TOP1MT	8	DNA topoisomerase I mitochondrial [Source:HGNC Symbol;Acc:HGNC:29787]	protein_coding
ENSG00000147454	-0.416185	6.14795	20.5546	0.000523905	0.0153728	SLC25A37	8	solute carrier family 25 member 37 [Source:HGNC Symbol;Acc:HGNC:29786]	protein_coding
ENSG00000091972	1.10255	3.1396	20.5203	0.000527601	0.0154476	CD200	3	CD200 molecule [Source:HGNC Symbol;Acc:HGNC:7203]	protein_coding
ENSG00000105472	-0.574559	7.40411	20.4975	0.000530077	0.0154813	CLEC11A	19	C-type lectin domain containing 11A [Source:HGNC Symbol;Acc:HGNC:10576]	protein_coding
ENSG00000259330	0.522103	5.9267	20.4885	0.000531057	0.0154813	INAFM2	15	InaF motif containing 2 [Source:HGNC Symbol;Acc:HGNC:35165]	protein_coding
ENSG00000130529	1.24689	1.63842	20.3879	0.000542159	0.0157367	TRPM4	19	transient receptor potential cation channel subfamily M member 4 [Source:HGNC Symbol;Acc:HGNC:17993]	protein_coding
ENSG00000198046	0.601806	4.30794	20.3978	0.000541056	0.0157367	ZNF667	19	zinc finger protein 667 [Source:HGNC Symbol;Acc:HGNC:28854]	protein_coding
ENSG00000155158	0.66707	3.96219	20.1717	0.000566928	0.0164071	TTC39B	9	tetratricopeptide repeat domain 39B [Source:HGNC Symbol;Acc:HGNC:23704]	protein_coding
ENSG00000181804	0.818087	4.44941	20.1652	0.000567698	0.0164071	SLC9A9	3	solute carrier family 9 member A9 [Source:HGNC Symbol;Acc:HGNC:20653]	protein_coding
ENSG00000136404	0.602321	5.21928	20.1511	0.000569365	0.01642	TM6SF1	15	transmembrane 6 superfamily member 1 [Source:HGNC Symbol;Acc:HGNC:11860]	protein_coding
ENSG00000182199	-0.581572	7.44602	20.1278	0.000572123	0.0164642	SHMT2	12	serine hydroxymethyltransferase 2 [Source:HGNC Symbol;Acc:HGNC:10852]	protein_coding
ENSG00000110315	0.419726	5.76904	20.0708	0.000578936	0.0166246	RNF141	11	ring finger protein 141 [Source:HGNC Symbol;Acc:HGNC:21159]	protein_coding
ENSG00000077984	-0.984927	10.7929	20.06	0.000580247	0.0166267	CST7	20	cystatin F [Source:HGNC Symbol;Acc:HGNC:2479]	protein_coding
ENSG00000181577	0.652649	5.82682	20.0442	0.000582155	0.0166459	C6orf223	6	chromosome 6 open reading frame 223 [Source:HGNC Symbol;Acc:HGNC:28692]	protein_coding
ENSG00000165821	1.18126	3.01266	20.0319	0.000583651	0.0166533	SALL2	14	spalt like transcription factor 2 [Source:HGNC Symbol;Acc:HGNC:10526]	protein_coding
ENSG00000017260	0.458956	8.08196	19.9657	0.000591762	0.0168489	ATP2C1	3	ATPase secretory pathway Ca2+ transporting 1 [Source:HGNC Symbol;Acc:HGNC:13211]	protein_coding
ENSG00000163464	1.28437	1.54961	19.9406	0.000594875	0.0169018	CXCR1	2	C-X-C motif chemokine receptor 1 [Source:HGNC Symbol;Acc:HGNC:6026]	protein_coding
ENSG00000153214	0.499913	5.58318	19.893	0.000600824	0.0170348	TMEM87B	2	transmembrane protein 87B [Source:HGNC Symbol;Acc:HGNC:25913]	protein_coding
ENSG00000107731	1.3799	2.07262	19.8402	0.0006075	0.0171766	UNC5B	10	unc-5 netrin receptor B [Source:HGNC Symbol;Acc:HGNC:12568]	protein_coding
ENSG00000156521	-0.609804	4.20803	19.8232	0.000609662	0.0171766	TYSND1	10	trypsin domain containing 1 [Source:HGNC Symbol;Acc:HGNC:28531]	protein_coding
ENSG00000180694	0.503864	5.27332	19.8319	0.000608553	0.0171766	TMEM64	8	transmembrane protein 64 [Source:HGNC Symbol;Acc:HGNC:25441]	protein_coding
ENSG00000188313	0.372968	6.86579	19.6765	0.000628756	0.0176775	PLSCR1	3	phospholipid scramblase 1 [Source:HGNC Symbol;Acc:HGNC:9092]	protein_coding
ENSG00000144677	0.485394	6.06428	19.6092	0.000637748	0.0178929	CTDSPL	3	CTD small phosphatase like [Source:HGNC Symbol;Acc:HGNC:16890]	protein_coding
ENSG00000153815	0.620185	3.56913	19.5686	0.000643244	0.0180095	CMIP	16	c-Maf inducing protein [Source:HGNC Symbol;Acc:HGNC:24319]	protein_coding
ENSG00000261371	0.642212	8.35057	19.5585	0.000644612	0.0180103	PECAM1	17	platelet and endothelial cell adhesion molecule 1 [Source:HGNC Symbol;Acc:HGNC:8823]	protein_coding
ENSG00000131378	0.467817	6.21523	19.5438	0.00064662	0.0180289	RFTN1	3	raftlin, lipid raft linker 1 [Source:HGNC Symbol;Acc:HGNC:30278]	protein_coding
ENSG00000119535	-0.709002	8.31627	19.5129	0.000650867	0.0181097	CSF3R	1	colony stimulating factor 3 receptor [Source:HGNC Symbol;Acc:HGNC:2439]	protein_coding
ENSG00000214357	0.951021	3.64971	19.495	0.000653343	0.0181411	NEURL1B	5	neuralized E3 ubiquitin protein ligase 1B [Source:HGNC Symbol;Acc:HGNC:35422]	protein_coding
ENSG00000010810	0.51966	6.0867	19.4483	0.000659842	0.0182164	FYN	6	FYN proto-oncogene, Src family tyrosine kinase [Source:HGNC Symbol;Acc:HGNC:4037]	protein_coding
ENSG00000170540	0.386798	8.84796	19.4654	0.000657448	0.0182164	ARL6IP1	16	ADP ribosylation factor like GTPase 6 interacting protein 1 [Source:HGNC Symbol;Acc:HGNC:697]	protein_coding
ENSG00000172578	0.473442	6.13751	19.4463	0.000660123	0.0182164	KLHL6	3	kelch like family member 6 [Source:HGNC Symbol;Acc:HGNC:18653]	protein_coding
ENSG00000100319	0.458031	5.0312	19.426	0.000662968	0.0182574	ZMAT5	22	zinc finger matrin-type 5 [Source:HGNC Symbol;Acc:HGNC:28046]	protein_coding
ENSG00000166503	0.462511	5.64765	19.407	0.00066566	0.0182941	HDGFL3	15	HDGF like 3 [Source:HGNC Symbol;Acc:HGNC:24937]	protein_coding
ENSG00000034510	-0.437307	8.68903	19.3831	0.000669045	0.0183496	TMSB10	2	thymosin beta 10 [Source:HGNC Symbol;Acc:HGNC:11879]	protein_coding
ENSG00000123610	1.86412	1.81363	19.3591	0.000672468	0.0184059	TNFAIP6	2	TNF alpha induced protein 6 [Source:HGNC Symbol;Acc:HGNC:11898]	protein_coding
ENSG00000134470	-0.816673	3.9197	19.3337	0.000676118	0.0184682	IL15RA	10	interleukin 15 receptor subunit alpha [Source:HGNC Symbol;Acc:HGNC:5978]	protein_coding
ENSG00000069702	3.38316	-0.34875	19.307	0.000679978	0.018536	TGFBR3	1	transforming growth factor beta receptor 3 [Source:HGNC Symbol;Acc:HGNC:11774]	protein_coding
ENSG00000081189	0.739265	7.16992	19.2686	0.000685577	0.0186131	MEF2C	5	myocyte enhancer factor 2C [Source:HGNC Symbol;Acc:HGNC:6996]	protein_coding
ENSG00000169397	-1.30903	9.2374	19.2733	0.000684878	0.0186131	RNASE3	14	ribonuclease A family member 3 [Source:HGNC Symbol;Acc:HGNC:10046]	protein_coding
ENSG00000128311	-0.607693	5.31819	19.2156	0.000693384	0.0187871	TST	22	thiosulfate sulfurtransferase [Source:HGNC Symbol;Acc:HGNC:12388]	protein_coding
ENSG00000115828	0.709778	4.07062	19.1903	0.000697136	0.0188507	QPCT	2	glutaminyl-peptide cyclotransferase [Source:HGNC Symbol;Acc:HGNC:9753]	protein_coding
ENSG00000180667	0.553873	5.01526	19.0896	0.000712354	0.0192235	YOD1	1	YOD1 deubiquitinase [Source:HGNC Symbol;Acc:HGNC:25035]	protein_coding
ENSG00000166947	-1.76802	3.16017	19.0592	0.000717029	0.0193109	EPB42	15	erythrocyte membrane protein band 4.2 [Source:HGNC Symbol;Acc:HGNC:3381]	protein_coding
ENSG00000070190	0.759382	5.43893	19.0296	0.000721608	0.0193424	DAPP1	4	dual adaptor of phosphotyrosine and 3-phosphoinositides 1 [Source:HGNC Symbol;Acc:HGNC:16500]	protein_coding
ENSG00000130751	-1.11279	2.17943	19.0237	0.000722514	0.0193424	NPAS1	19	neuronal PAS domain protein 1 [Source:HGNC Symbol;Acc:HGNC:7894]	protein_coding
ENSG00000163710	-1.97001	2.93918	19.0327	0.000721114	0.0193424	PCOLCE2	3	procollagen C-endopeptidase enhancer 2 [Source:HGNC Symbol;Acc:HGNC:8739]	protein_coding
ENSG00000111679	0.521429	8.56543	18.9894	0.000727871	0.01937	PTPN6	12	protein tyrosine phosphatase non-receptor type 6 [Source:HGNC Symbol;Acc:HGNC:9658]	protein_coding
ENSG00000137198	0.459377	7.21919	18.9986	0.000726439	0.01937	GMPR	6	guanosine monophosphate reductase [Source:HGNC Symbol;Acc:HGNC:4376]	protein_coding
ENSG00000148908	0.883858	5.64593	19.002	0.000725902	0.01937	RGS10	10	regulator of G protein signaling 10 [Source:HGNC Symbol;Acc:HGNC:9992]	protein_coding
ENSG00000183255	0.412471	8.64673	18.9627	0.000732078	0.0194435	PTTG1IP	21	PTTG1 interacting protein [Source:HGNC Symbol;Acc:HGNC:13524]	protein_coding
ENSG00000197561	-1.68351	12.1094	18.9446	0.000734935	0.0194808	ELANE	19	elastase, neutrophil expressed [Source:HGNC Symbol;Acc:HGNC:3309]	protein_coding
ENSG00000140740	0.32579	8.31413	18.9069	0.000740946	0.0196015	UQCRC2	16	ubiquinol-cytochrome c reductase core protein 2 [Source:HGNC Symbol;Acc:HGNC:12586]	protein_coding
ENSG00000163536	0.690034	3.94435	18.8618	0.000748201	0.0197546	SERPINI1	3	serpin family I member 1 [Source:HGNC Symbol;Acc:HGNC:8943]	protein_coding
ENSG00000100311	1.78067	0.537598	18.8514	0.00074989	0.0197603	PDGFB	22	platelet derived growth factor subunit B [Source:HGNC Symbol;Acc:HGNC:8800]	protein_coding
ENSG00000069020	0.706092	5.81704	18.8309	0.000753219	0.0198092	MAST4	5	microtubule associated serine/threonine kinase family member 4 [Source:HGNC Symbol;Acc:HGNC:19037]	protein_coding
ENSG00000110880	0.443378	8.06712	18.7612	0.000764689	0.0200325	CORO1C	12	coronin 1C [Source:HGNC Symbol;Acc:HGNC:2254]	protein_coding
ENSG00000138166	1.20066	1.65822	18.7658	0.00076393	0.0200325	DUSP5	10	dual specificity phosphatase 5 [Source:HGNC Symbol;Acc:HGNC:3071]	protein_coding
ENSG00000100823	-0.366263	8.15402	18.7442	0.000767517	0.0200674	APEX1	14	apurinic/apyrimidinic endodeoxyribonuclease 1 [Source:HGNC Symbol;Acc:HGNC:587]	protein_coding
ENSG00000197971	0.336945	7.01704	18.7088	0.000773448	0.0201832	MBP	18	myelin basic protein [Source:HGNC Symbol;Acc:HGNC:6925]	protein_coding
ENSG00000048052	0.777321	3.41009	18.6509	0.000783254	0.0203601	HDAC9	7	histone deacetylase 9 [Source:HGNC Symbol;Acc:HGNC:14065]	protein_coding
ENSG00000100345	0.511887	9.32546	18.6512	0.000783215	0.0203601	MYH9	22	myosin heavy chain 9 [Source:HGNC Symbol;Acc:HGNC:7579]	protein_coding
ENSG00000148400	0.776716	5.20233	18.6171	0.000789047	0.020471	NOTCH1	9	notch receptor 1 [Source:HGNC Symbol;Acc:HGNC:7881]	protein_coding
ENSG00000145365	-0.577967	4.47416	18.5638	0.000798282	0.0206707	TIFA	4	TRAF interacting protein with forkhead associated domain [Source:HGNC Symbol;Acc:HGNC:19075]	protein_coding
ENSG00000105220	-0.512953	8.97026	18.5332	0.000803648	0.0206901	GPI	19	glucose-6-phosphate isomerase [Source:HGNC Symbol;Acc:HGNC:4458]	protein_coding
[truncated: 748 more rows]

## Sheet: Table S7 - RNAseq_CsA_DEG
geneid	logFC	logCPM	F	PValue	FDR	hgnc_symbol	chromosome_name	description	gene_biotype
[truncated: 695 more rows]

[truncated: 3 more sheets: Table S8 - RNAseq_IM_DEG, Table S9 - xCell HSC, Table S10 - xCell Megakaryocyte]
